# Supplementary material for: Comparative Transcriptome Analyses of Deltamethrin-Resistant and -Susceptible Anopheles gambiae Mosquitoes from Kenya by RNA-Seq
Source: PubMed Central journal article supplement (PMC3436877; doi:10.1371/journal.pone.0044607), 2012-09-07
Supplement: pone.0044607.s009.pdf [file pone.0044607.s009.pdf]

File S2.  
**Survey on  
insecticide usage  
in six localities in  
Western Kenya.**

**Study site**

|           | <b>House demography<br/>Adults/kids</b> | <b>Trade name-Insecticide<br/>class<br/>(dosage, % use)</b>                                                                                                                                | <b>Vector control for<br/>animals</b> | <b>IRS<br/>(Insecticide class, %<br/>houses treated)</b> | <b>Bednets<br/>% usage-Type of bed nets<br/>(%<sub>1</sub>),<br/>N. bednets/household</b> |
|-----------|-----------------------------------------|--------------------------------------------------------------------------------------------------------------------------------------------------------------------------------------------|---------------------------------------|----------------------------------------------------------|-------------------------------------------------------------------------------------------|
| Ahero     | 5.1/5.85                                | Dursban-OP (depends on pest, 5%)<br>Furadan 5G-OP (depends on pest, 10%)<br>Tata Umeme-PY 2.5EC (15-20ml/20l, 55%),Ogor 40EC-OP (30-40ml/20l, 45%)<br>Mocap GR10-OP (depends on pest, 45%) | Triatix-PY <sub>2</sub> (55%)         | none                                                     | 95%, ITN (78.95%); LLTN (89.47%), 3.42                                                    |
| Chemelil  | 2.15/2.9                                | Diazol-OP (40-50 ml/20l, 5%)<br>Danadim-OP (400g/l, 5%)                                                                                                                                    | Triatix-PY (65%)                      | Doom-PY (0.03% w/w, 10%)                                 | 95%, ITN (47.37%), LLTN (84.21%), 2.25                                                    |
| Chulaimbo | 4.8/6.75                                | Diazol-OP (40-50 ml/20l, 10%)<br>Danadim-OP (400g/l, 5%)                                                                                                                                   | Triatix-PY (60%)                      | Not known, 5%                                            | 90%, ITN (33.3%), LLTN (88.9%), 3.22                                                      |
| Emutete   | 4/4.7                                   | Diazol-OP (40-50 ml/20l, 15%)<br>Pyrinex 48EC-OP (400g/l, 5%)                                                                                                                              | Triatix-PY (50%)                      | PYs, 80%                                                 | 95%, ITN (10.53%), LLTN (100%), 2.9                                                       |
| Bungoma   | 2.68/4.47                               | Actelic-OP (1.6% w/w, 15%)<br>Skana-OP and PY (50g/90kg; 15.79%) <sub>3</sub>                                                                                                              | Triatix-PY (26.32%)                   | Doom-PY (0.03% w/w, 15.78%)                              | 94.74%, ITN (11.10%), LLTN (88.9%), 2.11                                                  |
| Busia     | 4/6.05                                  | Actelic-OP (1.6% w/w, 15%)<br>Skana-OP and PY (50g/90kg; 5%)                                                                                                                               | Triatix-PY (25%)                      | none                                                     | 90%, ITN (61.11%), LLTN (88.89%), 3.67                                                    |
