# Supplementary material for: Comparative Transcriptome Analyses of Deltamethrin-Resistant and -Susceptible Anopheles gambiae Mosquitoes from Kenya by RNA-Seq
Source: PLOS journal article supplement (doi:10.1371/journal.pone.0044607), 2012-09-07
Supplement: S3 (10.1371/journal.pone.0044607.s003) [file journal.pone.0044607.s003]

**TableS2. Susceptibility to deltamethrin of wild *Anopheles gambiae* s.l. mosquitoes from 6 sites in Western Kenya as determined by the standard WHO tube test.**

| <b>Study site</b> | <b>N. mosquitoes tested</b><br>total (females) | <b>% mortality <math>\pm</math> 95% C.I.</b><br>total (females) | <b>KT50</b><br>min | <b>KT95</b><br>min |
|-------------------|------------------------------------------------|-----------------------------------------------------------------|--------------------|--------------------|
| kisumu strain     | 258 (205)                                      | 100 (100)                                                       | 27.39              | 42.8               |
| Ahero             | 131 (62)                                       | 96.61 $\pm$ 8.71 (93.33 $\pm$ 17.14)                            | 36.26              | *                  |
| Chemelil          | 115 (69)                                       | 92.39 $\pm$ 9.33 (90.49 $\pm$ 11.23)                            | 32.25              | 54.97              |
| Chulaimbo         | 315 (187)                                      | 97.64 $\pm$ 2.36 (97.04 $\pm$ 2.32)                             | 40.57              | *                  |
| Emutete           | 253 (133)                                      | 86.01 $\pm$ 3.24 (80.36 $\pm$ 5.46)                             | 39.57              | *                  |
| Bungoma           | 661 (337)                                      | 78.70 $\pm$ 5.60 (68.97 $\pm$ 7.86)                             | 43.37              | *                  |
| Busia             | 130 (77)                                       | 66.45 $\pm$ 13.73 (51.80 $\pm$ 17.32)                           | 39.04              | *                  |

\* the maximum percentage ( $\pm$  95% CI) of mosquitoes that were knocked down after 60 minutes ( $\pm$  8.70) of exposure was for Ahero 91.34, Chulaimbo 80.92 ( $\pm$  10.91), Emutete 80.11 ( $\pm$  10.51), Bungoma 80.75 ( $\pm$  5.93), and Busia 89.81 ( $\pm$  9.08)

\*\* the maximum percentage ( $\pm$  95% CI) of mosquitoes that were knocked down after 60 minutes ( $\pm$  23.97) of exposure for Emutete was 86.52
