# Supplementary material for: Comparative Transcriptome Analyses of Deltamethrin-Resistant and -Susceptible Anopheles gambiae Mosquitoes from Kenya by RNA-Seq
Source: PLOS journal article supplement (doi:10.1371/journal.pone.0044607), 2012-09-07
Supplement: S6 (10.1371/journal.pone.0044607.s006) [file journal.pone.0044607.s006]

**Table S5.**

P values associated with a hypergeometric test are shown for all significantly differentially accumulated transcripts (A), transcripts accumulated more in resistant than in susceptible (B) or accumulated less in resistant than in susceptible (C) mosquitoes, transcripts with read coverage only in resistant (D) or susceptible (E), respectively.

| Cluster | A        | B     | C     | D | E |
|---------|----------|-------|-------|---|---|
| X       | 0.57     | 1     | 0.999 | 1 | 1 |
| 2R      | 3.33E-08 | 1     | 0.999 | 1 | 1 |
| 2L      | 0.11     | 1     | 0.999 | 1 | 1 |
| 3R      | 0.996    | 1     | 1     | 1 | 1 |
| 3L      | 0.999    | 1     | 0.999 | 1 | 1 |
| UNK     | 0.999    | 0.999 | 1     | 1 | 1 |
