# Supplementary material for: Comparative Transcriptome Analyses of Deltamethrin-Resistant and -Susceptible Anopheles gambiae Mosquitoes from Kenya by RNA-Seq
Source: PLoS One. 2012 Sep 7;7(9):e44607. doi: 10.1371/journal.pone.0044607 (PMC3436877; doi:10.1371/journal.pone.0044607)
Supplement: Table S1 — List of primers used for qRT-PCR and RT-PCR. (XLSX) [file pone.0044607.s002.xlsx]

## Sheet: Sheet1
Table S1. Primer paires used for real-time quantitiative PCR (A) or RT-PCR (B)
A	VectorBase ID	function	forward	reverse	efficency %
	AGAP001198-RA	hypothetical protein, Trypsin*	ACAGCGACGAAATGTTACCC	GATCCAGCGGATGTGAAAGT	98.2
	AGAP003247-RA	Clip-domain Serine Protease family B, CLIPB19	GCAGATGTAGCATGCACGAA	AATTGGCTTCCAATGAGTCG	94.8
	AGAP003691-RA	hypothetical protein, Trypsin*	CCGACCGTGTACACCAAAAT	CCTTCAGCTCCGTTGTCATT	99.9
	AGAP004581-RA	hypothetical protein, hsp70*	ACGCCAACGGTATTCTGAAC	ACAGTACGCCTCGAGCTGAT	86.6
	AGAP004582-RA	hypothetical protein, hsp70*	ATTCAGGCCGATATCAAGCA	CTGCCATAGTCTTGCGTTCTC	90.6
	AGAP005547-RA	hypothetical protein, hsp20*	GGCCAAGAAGAATGGAGAGA	GACGAATAACTTAACGCTTAACAATG	98.6
	AGAP006958-RA	hsp83anoga	ACCGAGGACGAGGAGCTGA	TCCAGCTGGCCCTCCA	97.6
	AGAP006959-RA	hypothetical protein, hsp90*	CCGCGTATAGATCAAAGCTATTC	GTCCTTCCGGCATCTTGATA	92.4
	AGAP007054-RA	hypothetical protein, Na+/dicarboxylate, Na+/tricarboxylate and phosphate transporters**	CTGACGCTGAAGGGCATCTA	GAGCCGGTTTTCGATCACTC	93.1
	AGAP008369-RA	Lipid transport and metabolism	GACGTGCTGTGGAGCGTTA	TTGACCGTCTCGTAGTGCAG	103
	AGAP006009-RA***	CRP30	GAGACGGTACAGCCTCGCCATC	TGGCATTTGAATCTCACTGAGTGTTTG	104
B	Cufflinks gene ID	mapping position	forward	reverse	predicted length	EST coverage
	XLOC_025152	UNKN:30362579-30363863	GCCCTTTTTGCTTCTCTCCT	CCAGAGAAATCCAGGGCATA	1284	no
	XLOC_027065	X:1734440-1746994	TTCACGGGACAACAACAAAA	GTTCGCCCCTGTATCAGTGT	320	yes
	* best match to PFAM database
	** best match to KOG database
	*** primers from Togowa et al., 2008
