# Supplementary material for: Comparative Transcriptome Analyses of Deltamethrin-Resistant and -Susceptible Anopheles gambiae Mosquitoes from Kenya by RNA-Seq
Source: PLoS One. 2012 Sep 7;7(9):e44607. doi: 10.1371/journal.pone.0044607 (PMC3436877; doi:10.1371/journal.pone.0044607)
Supplement: Table S3 — Results of molecular identification of Anopheles gambiae and An. arabiensis and kdr genotype. (XLSX) [file pone.0044607.s004.xlsx]

## Sheet: Sheet1
Table S3. Species identification between An. gambiae and An. arabiensis and kdr genotype.
Study site	Phenotypic status*	Mosquito species identity				Kdr genotype***
		An. gambiae	An. arabiensis	Hybrid**	L1014L	L1014S	S1014S	L1014F
Ahero	RESISTANT		1		1
	SUSCEPTIBLE		1		0.229	0.75	0.021
Chemelil	RESISTANT		1			0.166	0.668	0.166
	SUSCEPTIBLE		1		0.152	0.761	8.7%4
Chulaimbo	RESISTANT	1				0.19	0.81
	SUSCEPTIBLE	0.957	0.043			4.3%, 4.3%	0.915
Emutete	RESISTANT	1				0.161	0.839
	SUSCEPTIBLE	1				0.062	0.938
Bungoma	RESISTANT	1			0.016	0.129	0.855
	SUSCEPTIBLE	0.915	0.064	0.021	0.021	4.3% , 4.3%	87.2% , 2.1%
Busia	RESISTANT	0.872	0.128		0.025	10.3% , 10.3%	0.769
	SUSCEPTIBLE	0.668	0.267	0.067	0.133	6.7% , 8.9%	60%, 4.4%, 6.7%
*Resistance or susceptibility to deltamethrin were determined by a standard WHO test (WHO, 1998). All resistant and a sample of
at least 46 susceptible mosquitoes per site were tested.
**Hybrid between An. gambiae and An. arabiensis.
***kdr genotypes for AG and H are in bold and in italics, respectively
