# Supplementary material for: Comparative Transcriptome Analyses of Deltamethrin-Resistant and -Susceptible Anopheles gambiae Mosquitoes from Kenya by RNA-Seq
Source: PLoS One. 2012 Sep 7;7(9):e44607. doi: 10.1371/journal.pone.0044607 (PMC3436877; doi:10.1371/journal.pone.0044607)
Supplement: Table S6 — List of novel transcriptional events significantly differentially accumulated detected when Cufflinks is run using the An. gambiae genome annotation as a guide for transcript annotation. (XLSX) [file pone.0044607.s007.xlsx]

## Sheet: Sheet2
table S6. List of novel transcriptional events significantly DA that were detected when Cufflinks was run using the An. gambiae genome annotation as a guide of transcript annotation.
test_id	tracking_id	class_code*	gene_id	gene	nearest_ref_id	tss_id	locus	length	coverage	sample_1	sample_2	status	Res_FPKM	Res_conf_lo	Res_conf_hi	Sus_FPKM	Sus_conf_lo	Sus_conf_hi	ln(fold_change)	test_stat	p_value	q_value	significant
TCONS_00005859	TCONS_00005859	p	XLOC_003429	AGAP004828	AGAP004828-RA	-	2L:4158115-4171314	555	-	Res	Sus	OK	3.49603	0.758942	6.23311	0	0	0	-1.79769e+308	-1.79769e+308	0.00531606	0.0278609	yes
TCONS_00005900	TCONS_00005900	p	XLOC_003480	AGAP004879	AGAP004879-RA	-	2L:4870280-4886314	85	-	Res	Sus	OK	1180000	159050	2190000	0	0	0	-1.79769e+308	-1.79769e+308	0.0103719	0.0445432	yes
TCONS_00005920	TCONS_00005920	p	XLOC_003508	AGAP004894	AGAP004894-RA	-	2L:5441312-5441616	304	-	Res	Sus	OK	18.5791	3.71654	33.4416	0	0	0	-1.79769e+308	-1.79769e+308	0.00620753	0.0310997	yes
TCONS_00005994	TCONS_00005994	p	XLOC_003592	AGAP004988	AGAP004988-RA	-	2L:7552109-7584213	1306	-	Res	Sus	OK	2.50946	1.17395	3.84497	0	0	0	-1.79769e+308	-1.79769e+308	8.56226e-05	0.00103875	yes
TCONS_00006017	TCONS_00006017	p	XLOC_003625	AGAP005022	AGAP005022-RA	-	2L:8373026-8373890	269	-	Res	Sus	OK	41.5722	7.62682	75.5177	0	0	0	-1.79769e+308	-1.79769e+308	0.00715556	0.0343515	yes
TCONS_00006028	TCONS_00006028	p	XLOC_003636	AGAP005035	AGAP005035-RA	-	2L:8643748-8650782	1484	-	Res	Sus	OK	3.00619	1.56524	4.44714	0.351639	0	0.75166	-2.14583	3.47657	0.00050788	0.00450346	yes
TCONS_00006034	TCONS_00006034	p	XLOC_003646	AGAP005040	AGAP005040-RA	-	2L:8709187-8712169	954	-	Res	Sus	OK	3.48688	1.58368	5.39008	0.728808	0	1.49783	-1.56535	2.63531	0.00840613	0.0385274	yes
TCONS_00006038	TCONS_00006038	p	XLOC_003651	AGAP005052	AGAP005052-RA	-	2L:8817054-8833988	713	-	Res	Sus	OK	14.6241	8.6426	20.6056	1.94691	0.38677	3.50705	-2.01643	4.48249	7.37765e-06	0.000129536	yes
TCONS_00006043	TCONS_00006043	p	XLOC_003657	AGAP005058	AGAP005058-RA	-	2L:9031428-9031737	309	-	Res	Sus	OK	14.4827	1.9089	27.0564	0	0	0	-1.79769e+308	-1.79769e+308	0.0106217	0.0452505	yes
TCONS_00006094	TCONS_00006094	p	XLOC_003708	AGAP005105	AGAP005105-RA	-	2L:10151548-10153577	494	-	Res	Sus	OK	6.74978	2.45779	11.0418	0.919598	0	2.25982	-1.99333	2.5072	0.0121692	0.0494283	yes
TCONS_00006114	TCONS_00006114	p	XLOC_003730	AGAP005125	AGAP005125-RA	-	2L:10282477-10285106	679	-	Res	Sus	OK	4.28359	1.68219	6.885	0.350858	0	0.931764	-2.50217	2.83767	0.00454444	0.0249582	yes
TCONS_00006123	TCONS_00006123	p	XLOC_003740	AGAP005134	AGAP005134-RA	-	2L:10359472-10369629	2220	-	Res	Sus	OK	1.19535	0.53347	1.85724	0.0811034	0	0.214032	-2.69047	3.11036	0.00186857	0.0128302	yes
TCONS_00006156	TCONS_00006156	p	XLOC_003779	AGAP005165	AGAP005165-RA	-	2L:11130783-11260999	494	-	Res	Sus	OK	6.95208	2.58812	11.316	0	0	0	-1.79769e+308	-1.79769e+308	0.000720942	0.00596925	yes
TCONS_00006169	TCONS_00006169	p	XLOC_003791	AGAP005183	AGAP005183-RA	-	2L:11845070-11956517	1241	-	Res	Sus	OK	1.38421	0.42608	2.34234	0	0	0	-1.79769e+308	-1.79769e+308	0.0019299	0.0131146	yes
TCONS_00006188	TCONS_00006188	p	XLOC_003817	AGAP005207	AGAP005207-RA	-	2L:12236126-12316815	454	-	Res	Sus	OK	8.19014	3.01794	13.3623	0	0	0	-1.79769e+308	-1.79769e+308	0.000770135	0.00629971	yes
TCONS_00006332	TCONS_00006332	p	XLOC_003968	AGAP005356	AGAP005356-RA	-	2L:14607104-14608524	1420	-	Res	Sus	OK	10.0512	6.40177	13.7007	4.27177	2.44605	6.09749	-0.855668	3.0516	0.00227625	0.0149036	yes
TCONS_00006395	TCONS_00006395	p	XLOC_004051	AGAP005492	AGAP005492-RA	-	2L:16199013-16199387	374	-	Res	Sus	OK	24.5714	12.102	37.0407	7.08493	1.41726	12.7526	-1.24361	2.62546	0.00865325	0.0393494	yes
TCONS_00006409	TCONS_00006409	p	XLOC_004068	AGAP005505	AGAP005505-RA	-	2L:16282516-16291143	4564	-	Res	Sus	OK	3.02308	1.94748	4.09868	1.19288	0.684503	1.70126	-0.929902	3.34995	0.000808266	0.00656658	yes
TCONS_00006421	TCONS_00006421	p	XLOC_004084	AGAP005509	AGAP005509-RA	-	2L:16486934-16537376	2067	-	Res	Sus	OK	3.43499	2.00016	4.86982	0.25691	0	0.540371	-2.59304	4.39585	1.1034e-05	0.000182616	yes
TCONS_00006514	TCONS_00006514	p	XLOC_004193	GPRNNA21	AGAP005681-RA	-	2L:18548555-18710890	3922	-	Res	Sus	OK	0.323357	0.0831459	0.563568	0	0	0	-1.79769e+308	-1.79769e+308	0.00354833	0.0208473	yes
TCONS_00006597	TCONS_00006597	p	XLOC_004288	AGAP005771	AGAP005771-RA	-	2L:20411451-20414627	1389	-	Res	Sus	OK	3.90441	2.12171	5.68711	0.685748	0.0938304	1.27767	-1.73935	3.56245	0.000367404	0.0034795	yes
TCONS_00006649	TCONS_00006649	p	XLOC_004347	AGAP005829	AGAP005829-RA	-	2L:22089948-22094334	652	-	Res	Sus	OK	12.8855	7.25293	18.5181	4.90724	2.142	7.67248	-0.965391	2.70732	0.00678286	0.033055	yes
TCONS_00006650	TCONS_00006650	p	XLOC_004348	AGAP005829	AGAP005829-RA	-	2L:22089948-22094334	1008	-	Res	Sus	OK	4.69919	2.41879	6.97959	1.13475	0.202217	2.06728	-1.42098	2.97781	0.00290318	0.0179483	yes
TCONS_00006674	TCONS_00006674	p	XLOC_004377	AGAP005888	AGAP005888-RA	-	2L:23177865-23177957	92	-	Res	Sus	OK	36863	4858.76	68867.2	0	0	0	-1.79769e+308	-1.79769e+308	0.0106217	0.0452417	yes
TCONS_00006682	TCONS_00006682	p	XLOC_004379	AGAP005892	AGAP005892-RA	-	2L:23210960-23218392	553	-	Res	Sus	OK	12.8372	6.755	18.9194	1.71819	0	3.51322	-2.01107	3.50626	0.000454458	0.00412509	yes
TCONS_00006692	TCONS_00006692	p	XLOC_004392	AGAP005911	AGAP005911-RA	-	2L:23611933-23641865	234	-	Res	Sus	OK	85.8154	20.0257	151.605	0	0	0	-1.79769e+308	-1.79769e+308	0.00454331	0.0249551	yes
TCONS_00006702	TCONS_00006702	p	XLOC_004403	AGAP005925	AGAP005925-RA	-	2L:23691105-23741699	216	-	Res	Sus	OK	89.3572	12.4923	166.222	0	0	0	-1.79769e+308	-1.79769e+308	0.0100348	0.0434936	yes
TCONS_00006731	TCONS_00006731	p	XLOC_004440	AGAP005955	AGAP005955-RA	-	2L:24044446-24048146	334	-	Res	Sus	OK	12.3234	2.57397	22.0728	0	0	0	-1.79769e+308	-1.79769e+308	0.00573532	0.0294529	yes
TCONS_00006751	TCONS_00006751	p	XLOC_004454	AGAP005971	AGAP005971-RA	-	2L:24107317-24320310	161	-	Res	Sus	OK	338.901	70.3902	607.411	0	0	0	-1.79769e+308	-1.79769e+308	0.00579643	0.0296735	yes
TCONS_00006785	TCONS_00006785	p	XLOC_004484	AGAP006018	AGAP006018-RA	-	2L:24711234-24845767	103	-	Res	Sus	OK	6853.88	787.458	12920.3	0	0	0	-1.79769e+308	-1.79769e+308	0.0119227	0.0486466	yes
TCONS_00006843	TCONS_00006843	p	XLOC_004561	AGAP006073	AGAP006073-RA	-	2L:26101449-26101698	249	-	Res	Sus	OK	56.5076	8.81248	104.203	3.4304	0	10.2912	-2.8017	2.58125	0.00984441	0.0428833	yes
TCONS_00006846	TCONS_00006846	p	XLOC_004564	AGAP006083	AGAP006083-RA	-	2L:26146382-26156793	540	-	Res	Sus	OK	7.16467	3.01961	11.3097	0	0	0	-1.79769e+308	-1.79769e+308	0.000273142	0.00272174	yes
TCONS_00006869	TCONS_00006869	p	XLOC_004601	AGAP006116	AGAP006116-RA	-	2L:26895943-26902403	1958	-	Res	Sus	OK	0.956406	0.345118	1.56769	0.100533	0	0.262429	-2.25269	2.60041	0.0093112	0.0412695	yes
TCONS_00006879	TCONS_00006879	p	XLOC_004615	AGAP006131	AGAP006131-RA	-	2L:27047672-27070111	831	-	Res	Sus	OK	12.1208	7.22309	17.0185	2.8981	1.16208	4.63412	-1.43087	3.96052	7.47874e-05	0.000931633	yes
TCONS_00006880	TCONS_00006880	p	XLOC_004616	AGAP006131	AGAP006131-RA	-	2L:27047672-27070111	346	-	Res	Sus	OK	22.9724	9.98401	35.9607	2.76816	0	6.53285	-2.11611	2.87351	0.00405941	0.0230105	yes
TCONS_00006925	TCONS_00006925	p	XLOC_004675	AGAP006196	AGAP006196-RA	-	2L:28213428-28222916	639	-	Res	Sus	OK	10.0063	5.26559	14.747	0	0	0	-1.79769e+308	-1.79769e+308	1.21369e-05	0.000198193	yes
TCONS_00006964	TCONS_00006964	p	XLOC_004718	ARR2	AGAP006263-RA	-	2L:28769677-28769876	199	-	Res	Sus	OK	144.574	31.6554	257.492	0	0	0	-1.79769e+308	-1.79769e+308	0.00522342	0.0276214	yes
TCONS_00007029	TCONS_00007029	p	XLOC_004798	AGAP006367	AGAP006367-RA	-	2L:30539023-30541051	714	-	Res	Sus	OK	5.26379	2.38979	8.13779	0	0	0	-1.79769e+308	-1.79769e+308	0.000124621	0.0014179	yes
TCONS_00007051	TCONS_00007051	p	XLOC_004813	AGAP006391	AGAP006391-RA	-	2L:31053880-31054278	398	-	Res	Sus	OK	13.0557	5.2903	20.821	0.895821	0	2.42518	-2.67924	2.96399	0.00303682	0.0185484	yes
TCONS_00007076	TCONS_00007076	p	XLOC_004844	AGAP006412	AGAP006412-RA	-	2L:31601165-31601772	93	-	Res	Sus	OK	28716.9	3309.34	54124.4	0	0	0	-1.79769e+308	-1.79769e+308	0.0118951	0.048588	yes
TCONS_00007094	TCONS_00007094	p	XLOC_004860	AGAP006431	AGAP006431-RA	-	2L:31781293-31797424	508	-	Res	Sus	OK	14.6121	7.63186	21.5923	0.742472	0	1.88547	-2.97962	3.6971	0.000218075	0.0022683	yes
TCONS_00007095	TCONS_00007095	p	XLOC_004861	AGAP006432	AGAP006432-RA	-	2L:31781293-31797424	408	-	Res	Sus	OK	16.7875	7.8797	25.6952	1.0225	0	2.76517	-2.79838	3.13542	0.00171609	0.0119733	yes
TCONS_00007121	TCONS_00007121	p	XLOC_004884	AGAP006453	AGAP006453-RA	-	2L:32298807-32352950	624	-	Res	Sus	OK	8.62261	4.31811	12.9271	1.82449	0.147031	3.50195	-1.55309	2.96901	0.00298757	0.0183313	yes
TCONS_00007122	TCONS_00007122	p	XLOC_004885	AGAP006453	AGAP006453-RA	-	2L:32298807-32352950	451	-	Res	Sus	OK	11.9646	5.40604	18.5232	0	0	0	-1.79769e+308	-1.79769e+308	0.000131866	0.00148997	yes
TCONS_00007173	TCONS_00007173	p	XLOC_004938	AGAP006507	AGAP006507-RA	-	2L:33173807-33175094	948	-	Res	Sus	OK	16.9455	10.8044	23.0866	8.37184	4.928	11.8157	-0.70513	2.5724	0.0100996	0.0436972	yes
TCONS_00007174	TCONS_00007174	p	XLOC_004939	AGAP006507	AGAP006507-RA	-	2L:33175177-33203403	321	-	Res	Sus	OK	16.0564	3.96624	28.1466	0	0	0	-1.79769e+308	-1.79769e+308	0.00395242	0.0225372	yes
TCONS_00007222	TCONS_00007222	p	XLOC_004986	AGAP006570	AGAP006570-RA	-	2L:34170499-34202923	445	-	Res	Sus	OK	15.7345	7.76674	23.7022	0	0	0	-1.79769e+308	-1.79769e+308	3.91488e-05	0.000540645	yes
TCONS_00007233	TCONS_00007233	p	XLOC_004997	AGAP006580	AGAP006580-RA	-	2L:34265813-34272554	85	-	Res	Sus	OK	1220000	182619	2250000	0	0	0	-1.79769e+308	-1.79769e+308	0.00931303	0.0412735	yes
TCONS_00007365	TCONS_00007365	p	XLOC_005137	AGAP006730	AGAP006730-RA	-	2L:37301684-37306159	665	-	Res	Sus	OK	14.1084	8.14284	20.0739	4.81694	2.11715	7.51674	-1.07463	3.06124	0.00220425	0.0145618	yes
TCONS_00007392	TCONS_00007392	p	XLOC_005166	AGAP006741	AGAP006741-RA	-	2L:37673261-37701160	830	-	Res	Sus	OK	0	0	0	1.52646	0.291129	2.76179	1.79769e+308	1.79769e+308	0.00673044	0.0328612	yes
TCONS_00007417	TCONS_00007417	p	XLOC_005197	AGAP006763	AGAP006763-RA	-	2L:38014381-38017690	1024	-	Res	Sus	OK	2.84187	1.23218	4.45156	0	0	0	-1.79769e+308	-1.79769e+308	0.000207031	0.00216773	yes
TCONS_00007459	TCONS_00007459	p	XLOC_005229	AGAP006791	AGAP006791-RA	-	2L:38384950-38385215	265	-	Res	Sus	OK	40.311	5.31323	75.3089	0	0	0	-1.79769e+308	-1.79769e+308	0.0106217	0.0452243	yes
TCONS_00007460	TCONS_00007460	p	XLOC_005230	AGAP006791	AGAP006791-RA	-	2L:38385704-38385987	283	-	Res	Sus	OK	37.1406	10.5219	63.7592	0	0	0	-1.79769e+308	-1.79769e+308	0.00263081	0.0166446	yes
TCONS_00007540	TCONS_00007540	p	XLOC_005331	AGAP006955	AGAP006955-RA	-	2L:40232449-40233597	405	-	Res	Sus	OK	21.2833	10.7218	31.8448	5.31644	0.910178	9.7227	-1.38712	2.87188	0.00408035	0.0230876	yes
TCONS_00007543	TCONS_00007543	p	XLOC_005333	HSP83_ANOGA	AGAP006958-RA	-	2L:40252919-40255455	448	-	Res	Sus	OK	4.20111	0.481508	7.9207	0	0	0	-1.79769e+308	-1.79769e+308	0.0119447	0.0486959	yes
TCONS_00007572	TCONS_00007572	p	XLOC_005365	AGAP007008	AGAP007008-RA	-	2L:40791045-40792013	367	-	Res	Sus	OK	17.6747	7.45173	27.8976	0	0	0	-1.79769e+308	-1.79769e+308	0.000272254	0.00271718	yes
TCONS_00007581	TCONS_00007581	p	XLOC_005376	AGAP007010	AGAP007010-RA	-	2L:40900501-40973291	476	-	Res	Sus	OK	17.9833	9.58442	26.3822	6.26386	2.24429	10.2834	-1.05465	2.65764	0.00786898	0.0366364	yes
TCONS_00007668	TCONS_00007668	p	XLOC_005465	AGAP007085	AGAP007085-RA	-	2L:42287793-42288081	288	-	Res	Sus	OK	27.3892	5.99705	48.7814	0	0	0	-1.79769e+308	-1.79769e+308	0.00522342	0.0276115	yes
TCONS_00007778	TCONS_00007778	p	XLOC_005573	AGAP007185	AGAP007185-RA	-	2L:44058775-44122327	130	-	Res	Sus	OK	1143.1	223.963	2062.24	0	0	0	-1.79769e+308	-1.79769e+308	0.00643528	0.031911	yes
TCONS_00007799	TCONS_00007799	p	XLOC_005595	AGAP007241	AGAP007241-RA	-	2L:44511156-44515421	378	-	Res	Sus	OK	11.6713	3.91979	19.4228	0.90344	0	2.52	-2.55868	2.68117	0.00733643	0.0350179	yes
TCONS_00007887	TCONS_00007887	p	XLOC_005696	AGAP007375	AGAP007375-RA	-	2L:46156158-46178709	1280	-	Res	Sus	OK	1.38952	0.445032	2.334	0	0	0	-1.79769e+308	-1.79769e+308	0.0016285	0.011493	yes
TCONS_00007929	TCONS_00007929	p	XLOC_005746	AGAP007458	AGAP007458-RA	-	2L:46700378-46700657	279	-	Res	Sus	OK	34.8319	7.62667	62.0371	0	0	0	-1.79769e+308	-1.79769e+308	0.00522342	0.0276181	yes
TCONS_00007967	TCONS_00007967	p	XLOC_005789	AGAP007530	AGAP007530-RA	-	2L:47229458-47241165	2028	-	Res	Sus	OK	4.37965	2.64873	6.11056	0.641072	0.182277	1.09987	-1.92158	4.70087	2.59061e-06	5.24578e-05	yes
TCONS_00008002	TCONS_00008002	p	XLOC_005826	AGAP007575	AGAP007575-RA	-	2L:47790471-47790745	274	-	Res	Sus	OK	41.8881	9.9245	73.8517	0	0	0	-1.79769e+308	-1.79769e+308	0.00438377	0.0243058	yes
TCONS_00008007	TCONS_00008007	p	XLOC_005834	AGAP007584	AGAP007584-RA	-	2L:47835146-47933922	1496	-	Res	Sus	OK	11.0327	7.14115	14.9242	4.92393	2.92459	6.92326	-0.806754	2.99989	0.00270076	0.0169752	yes
TCONS_00008050	TCONS_00008050	p	XLOC_005885	AGAP007635	AGAP007635-RA	-	2L:48515946-48516047	101	-	Res	Sus	OK	9969.17	1785.38	18153	0	0	0	-1.79769e+308	-1.79769e+308	0.00741872	0.0352429	yes
TCONS_00010069	TCONS_00010069	p	XLOC_003372	AGAP004768	AGAP004768-RA	-	2L:3286386-3286656	270	-	Res	Sus	OK	0	0	0	36.0298	7.20737	64.8522	1.79769e+308	1.79769e+308	0.00620753	0.0310926	yes
TCONS_00010104	TCONS_00010104	p	XLOC_003452	AGAP004849	AGAP004849-RA	-	2L:4444970-4462188	2641	-	Res	Sus	OK	0.0996107	0	0.249374	1.09781	0.532983	1.66265	2.39981	-3.02037	0.00252469	0.0161491	yes
TCONS_00010223	TCONS_00010223	p	XLOC_003799	AGAP005186	AGAP005186-RA	-	2L:12119829-12138428	314	-	Res	Sus	OK	0.594631	0.571439	0.617823	9.69601	0.620635	18.7714	2.79153	-5.95969	2.52712e-09	1.16029e-07	yes
TCONS_00010286	TCONS_00010286	p	XLOC_003982	AGAP005389	AGAP005389-RA	-	2L:14851871-14852351	480	-	Res	Sus	OK	0	0	0	3.88639	0.77743	6.99536	1.79769e+308	1.79769e+308	0.00620753	0.0311563	yes
TCONS_00010304	TCONS_00010304	p	XLOC_004035	AGAP005468	AGAP005468-RA	-	2L:15987468-15988529	1061	-	Res	Sus	OK	0.015756	0	0.0787802	3.06185	1.46346	4.66024	5.26955	-2.61262	0.00898514	0.0402529	yes
TCONS_00010324	TCONS_00010324	p	XLOC_004088	AGAP005511	AGAP005511-RA	-	2L:16486934-16537376	144	-	Res	Sus	OK	0	0	0	670.144	106.641	1233.65	1.79769e+308	1.79769e+308	0.00869176	0.0395001	yes
TCONS_00010390	TCONS_00010390	p	XLOC_004273	AGAP005755	AGAP005755-RA	-	2L:20213366-20280333	2209	-	Res	Sus	OK	0.594962	0.148967	1.04096	3.66515	2.22969	5.10061	1.81813	-4.29936	1.71292e-05	0.000266124	yes
TCONS_00010400	TCONS_00010400	p	XLOC_004288	AGAP005771	AGAP005771-RA	-	2L:20411451-20414627	1099	-	Res	Sus	OK	0.566873	0	1.21598	3.46572	1.74593	5.18551	1.81054	-2.9016	0.00371264	0.0214893	yes
TCONS_00010565	TCONS_00010565	p	XLOC_004666	ATC1_ANOGA	AGAP006186-RA	-	2L:27929408-27929789	381	-	Res	Sus	OK	0	0	0	5.71178	0.752846	10.6707	1.79769e+308	1.79769e+308	0.0106217	0.0448349	yes
TCONS_00010653	TCONS_00010653	p	XLOC_004862	AGAP006434	AGAP006434-RA	-	2L:31781293-31797424	522	-	Res	Sus	OK	0	0	0	4.95965	1.7049	8.2144	1.79769e+308	1.79769e+308	0.00115324	0.00874753	yes
TCONS_00010658	TCONS_00010658	p	XLOC_004868	AGAP006436	AGAP006436-RA	-	2L:31873855-31873971	116	-	Res	Sus	OK	0	0	0	3065.09	548.929	5581.25	1.79769e+308	1.79769e+308	0.00741872	0.0351861	yes
TCONS_00010707	TCONS_00010707	p	XLOC_004982	AGAP006541	AGAP006541-RA	-	2L:34084254-34084395	141	-	Res	Sus	OK	0	0	0	834.452	166.923	1501.98	1.79769e+308	1.79769e+308	0.00620753	0.0311634	yes
TCONS_00010786	TCONS_00010786	p	XLOC_005197	AGAP006763	AGAP006763-RA	-	2L:38014381-38017690	647	-	Res	Sus	OK	0.636241	0	1.56823	4.81017	2.06617	7.55416	2.02291	-2.57369	0.010062	0.04359	yes
TCONS_00010915	TCONS_00010915	p	XLOC_005442	AGAP007053	AGAP007053-RA	-	2L:41882542-41887644	1265	-	Res	Sus	OK	0	0	0	7.72084	4.75571	10.686	1.79769e+308	1.79769e+308	9.5569e-08	2.8415e-06	yes
TCONS_00010918	TCONS_00010918	p	XLOC_005449	IFA	AGAP007056-RA	-	2L:41904857-41910306	793	-	Res	Sus	OK	0	0	0	1.6342	0.314687	2.95372	1.79769e+308	1.79769e+308	0.00662509	0.0324799	yes
TCONS_00010920	TCONS_00010920	p	XLOC_005451	AGAP007058	AGAP007058-RA	-	2L:42003200-42005317	2117	-	Res	Sus	OK	3.31471	1.92737	4.70205	6.75144	4.37385	9.12903	0.711386	-2.60111	0.00929214	0.0411933	yes
TCONS_00010924	TCONS_00010924	p	XLOC_005464	AGAP007081	AGAP007081-RA	-	2L:42227583-42268020	541	-	Res	Sus	OK	0	0	0	2.59238	0.328598	4.85616	1.79769e+308	1.79769e+308	0.0110017	0.0459251	yes
TCONS_00010977	TCONS_00010977	p	XLOC_005607	AGAP007254	AGAP007254-RA	-	2L:44665739-44695102	948	-	Res	Sus	OK	0	0	0	1.90964	0.641575	3.17771	1.79769e+308	1.79769e+308	0.00129812	0.00962477	yes
TCONS_00011003	TCONS_00011003	p	XLOC_005691	AGAP007369	AGAP007369-RA	-	2L:46111530-46111691	161	-	Res	Sus	OK	0	0	0	440.01	96.3432	783.678	1.79769e+308	1.79769e+308	0.00522342	0.0275356	yes
TCONS_00011079	TCONS_00011079	p	XLOC_005928	AGAP007696	AGAP007696-RA	-	2L:49097936-49130959	8788	-	Res	Sus	OK	0	0	0	0.420212	0.223083	0.617342	1.79769e+308	1.79769e+308	1.00706e-05	0.000169016	yes
TCONS_00018090	TCONS_00018090	p	XLOC_009883	GPRGR38	AGAP001114-RA	-	2R:350109-350387	278	-	Res	Sus	OK	28.9927	3.82141	54.1641	0	0	0	-1.79769e+308	-1.79769e+308	0.0106217	0.045233	yes
TCONS_00018103	TCONS_00018103	p	XLOC_009898	AGAP001181	AGAP001181-RA	-	2R:790836-790943	107	-	Res	Sus	OK	6188.98	1466.35	10911.6	0	0	0	-1.79769e+308	-1.79769e+308	0.00438377	0.0243333	yes
TCONS_00018177	TCONS_00018177	p	XLOC_009995	AGAP001291	AGAP001291-RA	-	2R:2537990-2538538	548	-	Res	Sus	OK	11.4696	5.83943	17.0997	2.10949	0.0938088	4.12517	-1.69325	3.15246	0.00161903	0.0114868	yes
TCONS_00018178	TCONS_00018178	p	XLOC_009996	AGAP001291	AGAP001291-RA	-	2R:2538715-2538850	135	-	Res	Sus	OK	1120.97	317.569	1924.36	0	0	0	-1.79769e+308	-1.79769e+308	0.00263081	0.0166517	yes
TCONS_00018210	TCONS_00018210	p	XLOC_010034	AGAP001339	AGAP001339-RA	-	2R:3308652-3322618	1018	-	Res	Sus	OK	1.54103	0.394886	2.68717	0	0	0	-1.79769e+308	-1.79769e+308	0.00358256	0.0209841	yes
TCONS_00018233	TCONS_00018233	p	XLOC_010053	AGAP001370	AGAP001370-RA	-	2R:3880074-3882398	807	-	Res	Sus	OK	6.14157	3.1253	9.15785	0.571451	0	1.30761	-2.37466	3.44487	0.00057134	0.00493912	yes
TCONS_00018335	TCONS_00018335	p	XLOC_010164	AGAP001447	AGAP001447-RA	-	2R:5138105-5214670	329	-	Res	Sus	OK	16.1507	4.63793	27.6634	0.377491	0.368082	0.3869	-3.75617	10.5323	0	0	yes
TCONS_00018366	TCONS_00018366	p	XLOC_010186	SHAKB_ANOGA	AGAP001487-RA	-	2R:5473690-5474378	688	-	Res	Sus	OK	7.11161	3.52318	10.7	1.23642	0	2.50845	-1.74951	3.05358	0.00226131	0.0148299	yes
TCONS_00018406	TCONS_00018406	p	XLOC_010231	AGAP001541	AGAP001541-RA	-	2R:6047999-6063249	1024	-	Res	Sus	OK	10.0982	6.10882	14.0876	4.10141	2.11243	6.09039	-0.90103	2.88099	0.00396426	0.0225843	yes
TCONS_00018553	TCONS_00018553	p	XLOC_010413	GPRALS2	AGAP001773-RB	-	2R:9765309-10000085	349	-	Res	Sus	OK	6.32817	0	12.7545	0.366114	0.343278	0.388951	-2.84982	5.60205	2.1183e-08	7.59883e-07	yes
TCONS_00018591	TCONS_00018591	p	XLOC_010458	AGAP001790	AGAP001790-RA	-	2R:10485302-10493692	1362	-	Res	Sus	OK	2.12087	0.947984	3.29376	0	0	0	-1.79769e+308	-1.79769e+308	0.00014931	0.00165487	yes
TCONS_00018655	TCONS_00018655	p	XLOC_010530	AGAP001883	AGAP001883-RA	-	2R:11855013-11869956	97	-	Res	Sus	OK	18590.2	4065.82	33114.6	0	0	0	-1.79769e+308	-1.79769e+308	0.00523569	0.0275411	yes
TCONS_00018661	TCONS_00018661	p	XLOC_010537	AGAP001905	AGAP001905-RB	-	2R:11989724-11991519	880	-	Res	Sus	OK	4.57377	2.20996	6.93757	0.644243	0	1.39704	-1.96002	3.06807	0.00215444	0.0143034	yes
TCONS_00018669	TCONS_00018669	p	XLOC_010545	AGAP001925	AGAP001925-RA	-	2R:12333577-12334077	500	-	Res	Sus	OK	23.2486	13.3767	33.1206	8.41608	3.79035	13.0418	-1.0161	2.92593	0.00343429	0.0203398	yes
TCONS_00018689	TCONS_00018689	p	XLOC_010570	AGAP001941	AGAP001941-RA	-	2R:12681097-12683965	317	-	Res	Sus	OK	81.6111	46.5752	116.647	33.5001	15.7863	51.2138	-0.890418	2.61465	0.0089319	0.0400755	yes
TCONS_00018711	TCONS_00018711	p	XLOC_010593	GPRVPR1	AGAP001962-RA	-	2R:12912341-12913304	361	-	Res	Sus	OK	7.56128	0.900087	14.2225	0	0	0	-1.79769e+308	-1.79769e+308	0.0115963	0.0476852	yes
TCONS_00018718	TCONS_00018718	p	XLOC_010601	AGAP013031	AGAP013031-RA	-	2R:13014857-13015109	252	-	Res	Sus	OK	53.8666	8.40062	99.3327	0	0	0	-1.79769e+308	-1.79769e+308	0.00890526	0.0401766	yes
TCONS_00018722	TCONS_00018722	p	XLOC_010607	AGAP001984	AGAP001984-RA	-	2R:13155027-13179897	706	-	Res	Sus	OK	10.6082	5.87477	15.3416	1.26578	0.00169864	2.52986	-2.12594	3.88722	0.000101398	0.00119401	yes
TCONS_00018748	TCONS_00018748	p	XLOC_010630	AGAP002006	AGAP002006-RA	-	2R:13546076-13549598	3522	-	Res	Sus	OK	11.6477	7.90503	15.3903	6.5019	4.3537	8.65011	-0.58301	2.53	0.0114063	0.0470928	yes
TCONS_00018765	TCONS_00018765	p	XLOC_010653	AGAP002039	AGAP002039-RA	-	2R:14215538-14217456	540	-	Res	Sus	OK	14.9566	8.09161	21.8217	3.99619	1.17497	6.8174	-1.31981	3.13469	0.00172033	0.0119991	yes
TCONS_00018775	TCONS_00018775	p	XLOC_010662	AGAP002041	AGAP002041-RA	-	2R:14311095-14358265	842	-	Res	Sus	OK	6.08536	3.14607	9.02465	0.616676	0	1.36932	-2.2893	3.48823	0.000486232	0.0043482	yes
TCONS_00018808	TCONS_00018808	p	XLOC_010702	AGAP002094	AGAP002094-RA	-	2R:15256255-15269590	1326	-	Res	Sus	OK	3.69954	1.96097	5.4381	0.783401	0.133093	1.43371	-1.55232	3.25468	0.00113521	0.00863152	yes
TCONS_00018810	TCONS_00018810	p	XLOC_010704	AGAP013535	AGAP013535-RA	-	2R:15270419-15292175	803	-	Res	Sus	OK	3.37127	1.33586	5.40668	0	0	0	-1.79769e+308	-1.79769e+308	0.000462143	0.00418022	yes
TCONS_00018811	TCONS_00018811	p	XLOC_010705	AGAP013535	AGAP013535-RA	-	2R:15270419-15292175	573	-	Res	Sus	OK	14.7566	8.15688	21.3563	0.58301	0	1.48457	-3.23124	4.01455	5.95602e-05	0.000772479	yes
TCONS_00018815	TCONS_00018815	p	XLOC_010708	AGAP002095	AGAP002095-RB	-	2R:15294176-15326760	2219	-	Res	Sus	OK	2.54691	1.42212	3.67169	0.910749	0.376792	1.44471	-1.02837	2.80207	0.00507756	0.0270707	yes
TCONS_00018842	TCONS_00018842	p	XLOC_010737	AGAP002115	AGAP002115-RA	-	2R:15781998-15913118	1799	-	Res	Sus	OK	2.0458	1.01724	3.07435	0	0	0	-1.79769e+308	-1.79769e+308	3.47481e-05	0.000488899	yes
TCONS_00018921	TCONS_00018921	p	XLOC_010819	AGAP002178	AGAP002178-RA	-	2R:16920241-17198201	1181	-	Res	Sus	OK	5.8366	3.31276	8.36044	0	0	0	-1.79769e+308	-1.79769e+308	1.87141e-06	3.93201e-05	yes
TCONS_00018935	TCONS_00018935	p	XLOC_010833	AGAP002186	AGAP002186-RB	-	2R:17216189-17379169	1863	-	Res	Sus	OK	2.9426	1.62393	4.26126	0.533915	0.0943687	0.973461	-1.70681	3.64191	0.000270625	0.00270521	yes
TCONS_00018946	TCONS_00018946	p	XLOC_010845	AGAP002192	AGAP002192-RA	-	2R:17382695-17383035	340	-	Res	Sus	OK	10.123	1.5787	18.6672	0	0	0	-1.79769e+308	-1.79769e+308	0.00890526	0.0401273	yes
TCONS_00019104	TCONS_00019104	p	XLOC_011025	AGAP002382	AGAP002382-RA	-	2R:20862565-20863323	493	-	Res	Sus	OK	4.56904	1.06507	8.07301	0	0	0	-1.79769e+308	-1.79769e+308	0.00455469	0.0250021	yes
TCONS_00019132	TCONS_00019132	p	XLOC_011056	AGAP002438	AGAP002438-RB	-	2R:21385433-21421240	160	-	Res	Sus	OK	320.108	55.208	585.008	0	0	0	-1.79769e+308	-1.79769e+308	0.00782835	0.0365011	yes
TCONS_00019182	TCONS_00019182	p	XLOC_011117	AGAP002506	AGAP002506-RA	-	2R:22110765-22111146	381	-	Res	Sus	OK	19.0028	8.69996	29.3055	0	0	0	-1.79769e+308	-1.79769e+308	0.000112632	0.00130165	yes
TCONS_00019217	TCONS_00019217	p	XLOC_011150	AGAP002550	AGAP002550-RA	-	2R:22700225-22701342	1117	-	Res	Sus	OK	39.2658	26.5777	51.9539	9.78604	6.09365	13.4784	-1.3894	5.59374	2.22229e-08	7.89486e-07	yes
TCONS_00019280	TCONS_00019280	p	XLOC_011222	AGAP013538	AGAP013538-RB	-	2R:24286617-24289142	1510	-	Res	Sus	OK	16.8675	11.2349	22.5001	5.08616	3.03761	7.13471	-1.19886	4.58286	4.58667e-06	8.61548e-05	yes
TCONS_00019284	TCONS_00019284	p	XLOC_011225	AGAP002624	AGAP002624-RB	-	2R:24302646-24303679	1033	-	Res	Sus	OK	2.93739	1.29796	4.57682	0.463295	0	1.03124	-1.84691	2.74236	0.0061	0.0308093	yes
TCONS_00019295	TCONS_00019295	p	XLOC_011236	AGAP002628	AGAP002628-RA	-	2R:24496048-24555088	376	-	Res	Sus	OK	19.6459	8.98702	30.3048	0	0	0	-1.79769e+308	-1.79769e+308	0.00011377	0.00131273	yes
TCONS_00019309	TCONS_00019309	p	XLOC_011252	AGAP002643	AGAP002643-RA	-	2R:24825282-24979792	137	-	Res	Sus	OK	1969.84	897.067	3042.62	118.535	0	354.632	-2.81051	2.72215	0.00648582	0.0320643	yes
TCONS_00019345	TCONS_00019345	p	XLOC_011300	AGAP002702	AGAP002702-RA	-	2R:25774892-25775133	241	-	Res	Sus	OK	99.3148	31.8184	166.811	0	0	0	-1.79769e+308	-1.79769e+308	0.00162621	0.0115007	yes
TCONS_00019347	TCONS_00019347	p	XLOC_011303	AGAP002702	AGAP002702-RA	-	2R:25776390-25776788	398	-	Res	Sus	OK	13.7428	5.73589	21.7497	1.79164	0	4.24517	-2.03738	2.73802	0.00618099	0.031108	yes
TCONS_00019396	TCONS_00019396	p	XLOC_011356	AGAP002754	AGAP002754-RA	-	2R:26675920-26676194	274	-	Res	Sus	OK	70.4482	28.0854	112.811	10.9992	0	25.2378	-1.85705	2.60209	0.00926585	0.0410933	yes
TCONS_00019401	TCONS_00019401	p	XLOC_011364	AGAP002757	AGAP002757-RA	-	2R:26749436-26770531	569	-	Res	Sus	OK	6.16033	2.5191	9.80156	1.09778	0	2.45625	-1.72484	2.51547	0.0118875	0.0485614	yes
TCONS_00019451	TCONS_00019451	p	XLOC_011418	CLIPA15	AGAP002815-RA	-	2R:27936949-27937149	200	-	Res	Sus	OK	141.954	31.0818	252.826	0	0	0	-1.79769e+308	-1.79769e+308	0.00522342	0.027529	yes
TCONS_00019486	TCONS_00019486	p	XLOC_011453	AGAP002844	AGAP002844-RA	-	2R:28251272-28251476	204	-	Res	Sus	OK	138.468	32.807	244.128	0	0	0	-1.79769e+308	-1.79769e+308	0.00438377	0.0243762	yes
TCONS_00019505	TCONS_00019505	p	XLOC_011477	AGAP002873	AGAP002873-RA	-	2R:28536753-28544347	370	-	Res	Sus	OK	29.2275	15.0238	43.4311	4.13778	0	8.50572	-1.95495	3.36448	0.000766886	0.00628129	yes
TCONS_00019506	TCONS_00019506	p	XLOC_011478	AGAP002873	AGAP002873-RA	-	2R:28536753-28544347	988	-	Res	Sus	OK	4.7913	2.46372	7.11888	0.353596	0	0.845478	-2.6064	3.53777	0.000403522	0.00375149	yes
TCONS_00019542	TCONS_00019542	p	XLOC_011523	AGAP002914	AGAP002914-RB	-	2R:29301696-29490971	1753	-	Res	Sus	OK	9.06632	5.86554	12.2671	1.97304	0.995921	2.95017	-1.52499	5.01483	5.30798e-07	1.28896e-05	yes
TCONS_00019578	TCONS_00019578	p	XLOC_011555	AGAP002949	AGAP002949-RA	-	2R:30020625-30051067	1387	-	Res	Sus	OK	3.31122	1.73237	4.89007	0.365771	0	0.789654	-2.20306	3.51608	0.000437975	0.00400597	yes
TCONS_00019579	TCONS_00019579	p	XLOC_011556	AGAP002949	AGAP002949-RA	-	2R:30020625-30051067	377	-	Res	Sus	OK	13.1728	4.85195	21.4936	1.88641	0	4.55707	-1.94348	2.50729	0.0121662	0.0494256	yes
TCONS_00019582	TCONS_00019582	p	XLOC_011560	AGAP002953	AGAP002953-RA	-	2R:30072444-30074332	1888	-	Res	Sus	OK	7.61817	4.87785	10.3585	3.74909	2.22683	5.27135	-0.709023	2.61414	0.00894523	0.0401108	yes
TCONS_00019592	TCONS_00019592	p	XLOC_011570	AGAP002972	AGAP002972-RA	-	2R:30323509-30371851	851	-	Res	Sus	OK	3.08603	1.2164	4.95565	0	0	0	-1.79769e+308	-1.79769e+308	0.000481308	0.00431116	yes
TCONS_00019593	TCONS_00019593	p	XLOC_011571	AGAP002972	AGAP002972-RA	-	2R:30323509-30371851	370	-	Res	Sus	OK	17.8841	7.67005	28.0982	0	0	0	-1.79769e+308	-1.79769e+308	0.000231011	0.0023804	yes
TCONS_00019613	TCONS_00019613	p	XLOC_011587	AGAP002986	AGAP002986-RA	-	2R:30565156-30626284	2196	-	Res	Sus	OK	0.995405	0.402844	1.58797	0	0	0	-1.79769e+308	-1.79769e+308	0.000390174	0.00365513	yes
TCONS_00019622	TCONS_00019622	p	XLOC_011598	AGAP013545	AGAP013545-RA	-	2R:30954841-30975549	309	-	Res	Sus	OK	20.6428	5.62188	35.6638	0	0	0	-1.79769e+308	-1.79769e+308	0.00299308	0.0183549	yes
TCONS_00019630	TCONS_00019630	p	XLOC_011607	AGAP003008	AGAP003008-RA	-	2R:31042507-31053330	1320	-	Res	Sus	OK	3.55059	1.85713	5.24405	0	0	0	-1.79769e+308	-1.79769e+308	1.37464e-05	0.000220557	yes
TCONS_00019656	TCONS_00019656	p	XLOC_011638	AGAP003049	AGAP003049-RB	-	2R:31439416-31442223	153	-	Res	Sus	OK	411.619	75.0621	748.176	0	0	0	-1.79769e+308	-1.79769e+308	0.00722137	0.0345997	yes
TCONS_00019660	TCONS_00019660	p	XLOC_011645	AGAP003052	AGAP003052-RA	-	2R:31464539-31481595	351	-	Res	Sus	OK	18.6968	7.49414	29.8995	2.03096	0	5.05209	-2.21985	2.76844	0.00563261	0.0290608	yes
TCONS_00019682	TCONS_00019682	p	XLOC_011664	AGAP003069	AGAP003069-RA	-	2R:31961864-31965166	595	-	Res	Sus	OK	7.86428	3.72392	12.0046	0.961857	0	2.17985	-2.10122	3.0644	0.00218104	0.0144452	yes
TCONS_00019701	TCONS_00019701	p	XLOC_011682	AGAP003081	AGAP003081-RA	-	2R:32295109-32297554	1028	-	Res	Sus	OK	5.20036	2.76749	7.63322	1.21787	0.264202	2.17154	-1.45162	3.1828	0.00145857	0.010552	yes
TCONS_00019702	TCONS_00019702	p	XLOC_011682	AGAP003081	AGAP003081-RA	-	2R:32295109-32297554	957	-	Res	Sus	OK	8.15643	4.68018	11.6327	2.30345	0.902843	3.70405	-1.2644	3.4056	0.000660178	0.00555262	yes
TCONS_00019708	TCONS_00019708	p	XLOC_011687	AGAP003104	AGAP003104-RA	-	2R:32434368-32434453	85	-	Res	Sus	OK	1170000	153799	2180000	0	0	0	-1.79769e+308	-1.79769e+308	0.0106217	0.0450201	yes
TCONS_00019725	TCONS_00019725	p	XLOC_011707	AGAP003126	AGAP003126-RA	-	2R:32960079-33081149	1307	-	Res	Sus	OK	8.14031	4.99892	11.2817	2.77935	1.40073	4.15797	-1.07461	3.41983	0.000626609	0.00532304	yes
TCONS_00019727	TCONS_00019727	p	XLOC_011709	AGAP003128	AGAP003128-RA	-	2R:32960079-33081149	607	-	Res	Sus	OK	11.4052	6.07854	16.7318	0	0	0	-1.79769e+308	-1.79769e+308	9.2478e-06	0.000156939	yes
TCONS_00019793	TCONS_00019793	p	XLOC_011783	AGAP003208	AGAP003208-RA	-	2R:33883809-33916572	435	-	Res	Sus	OK	12.0477	5.26166	18.8337	0	0	0	-1.79769e+308	-1.79769e+308	0.000192077	0.00203923	yes
TCONS_00019818	TCONS_00019818	p	XLOC_011814	AGAP013058	AGAP013058-RA	-	2R:34678390-34685667	1981	-	Res	Sus	OK	1.90865	0.962632	2.85466	0.442964	0.0568603	0.829068	-1.46066	2.91344	0.0035747	0.0209492	yes
TCONS_00019829	TCONS_00019829	p	XLOC_011825	AGAP003285	AGAP003285-RA	-	2R:35059045-35059333	288	-	Res	Sus	OK	18.9116	1.13159	36.6916	1.06521	0	3.19562	-2.87661	2.60331	0.00923272	0.0410123	yes
TCONS_00019859	TCONS_00019859	p	XLOC_011865	AGAP003328	AGAP003328-RA	-	2R:36029789-36031690	275	-	Res	Sus	OK	67.7941	26.8937	108.695	0	0	0	-1.79769e+308	-1.79769e+308	0.00045808	0.00414943	yes
TCONS_00019910	TCONS_00019910	p	XLOC_011918	AGAP012963	AGAP012963-RA	-	2R:36875906-36876076	170	-	Res	Sus	OK	219.544	28.9371	410.15	0	0	0	-1.79769e+308	-1.79769e+308	0.0106217	0.0448907	yes
TCONS_00019919	TCONS_00019919	p	XLOC_011931	CPR121	AGAP003383-RA	-	2R:37130844-37293763	141	-	Res	Sus	OK	624.597	102.178	1147.02	0	0	0	-1.79769e+308	-1.79769e+308	0.00839734	0.0384952	yes
TCONS_00019920	TCONS_00019920	p	XLOC_011933	AGAP003387	AGAP003387-RA	-	2R:37130844-37293763	85	-	Res	Sus	OK	1470000	336126	2610000	0	0	0	-1.79769e+308	-1.79769e+308	0.00479013	0.0259363	yes
TCONS_00019940	TCONS_00019940	p	XLOC_011960	AGAP003439	AGAP003439-RA	-	2R:37723400-37723531	131	-	Res	Sus	OK	1094.56	218.955	1970.17	0	0	0	-1.79769e+308	-1.79769e+308	0.00620753	0.0310714	yes
TCONS_00019959	TCONS_00019959	p	XLOC_011987	AGAP013144	AGAP013144-RA	-	2R:38385420-38385747	327	-	Res	Sus	OK	13.1184	2.62418	23.6125	0	0	0	-1.79769e+308	-1.79769e+308	0.00620753	0.0311527	yes
TCONS_00019960	TCONS_00019960	p	XLOC_011988	AGAP013144	AGAP013144-RA	-	2R:38386301-38386625	324	-	Res	Sus	OK	12.9596	2.32094	23.5983	0.578967	0	1.7369	-3.10835	2.87555	0.0040333	0.0229184	yes
TCONS_00020009	TCONS_00020009	p	XLOC_012047	AGAP003568	AGAP003568-RA	-	2R:39691790-39720240	3261	-	Res	Sus	OK	0.541112	0.194582	0.887641	0	0	0	-1.79769e+308	-1.79769e+308	0.000894992	0.00713842	yes
TCONS_00020028	TCONS_00020028	p	XLOC_012069	AGAP003595	AGAP003595-RA	-	2R:40384385-40384567	182	-	Res	Sus	OK	184.031	32.9582	335.104	12.2777	0	36.833	-2.70732	2.50455	0.0122606	0.0497081	yes
TCONS_00020032	TCONS_00020032	p	XLOC_012077	AGAP003620	AGAP003620-RA	-	2R:40516575-40777289	214	-	Res	Sus	OK	159.521	54.6116	264.431	0	0	0	-1.79769e+308	-1.79769e+308	0.0011785	0.00887812	yes
TCONS_00020038	TCONS_00020038	p	XLOC_012088	AGAP003623	AGAP003623-RC	-	2R:40516575-40777289	959	-	Res	Sus	OK	11.9936	7.35326	16.6339	5.58253	3.03793	8.12714	-0.764729	2.55814	0.0105234	0.0449492	yes
TCONS_00020040	TCONS_00020040	p	XLOC_012091	AGAP003627	AGAP003627-RA	-	2R:40516575-40777289	206	-	Res	Sus	OK	137.35	33.8998	240.8	0	0	0	-1.79769e+308	-1.79769e+308	0.00396089	0.022568	yes
TCONS_00020072	TCONS_00020072	p	XLOC_012136	AGAP003691	AGAP003691-RA	-	2R:42045502-42098290	1507	-	Res	Sus	OK	2.13912	1.00673	3.2715	0	0	0	-1.79769e+308	-1.79769e+308	7.9029e-05	0.000976476	yes
TCONS_00020115	TCONS_00020115	p	XLOC_012185	AGAP013180	AGAP013180-RA	-	2R:42418049-42424517	676	-	Res	Sus	OK	5.86367	2.68511	9.04223	0.609201	0	1.45692	-2.26438	3.03257	0.00242483	0.0156511	yes
TCONS_00020142	TCONS_00020142	p	XLOC_012218	AGAP003782	AGAP003782-RA	-	2R:43164768-43328912	85	-	Res	Sus	OK	1210000	177597	2240000	0	0	0	-1.79769e+308	-1.79769e+308	0.00951372	0.0418477	yes
TCONS_00020214	TCONS_00020214	p	XLOC_012294	AGAP003854	AGAP003854-RA	-	2R:44568786-44632976	664	-	Res	Sus	OK	5.92928	2.69415	9.16442	0	0	0	-1.79769e+308	-1.79769e+308	0.000123401	0.00140912	yes
TCONS_00020240	TCONS_00020240	p	XLOC_012322	AGAP003880	AGAP003880-RA	-	2R:45242996-45244000	724	-	Res	Sus	OK	3.77112	1.45316	6.08908	0.203376	0	0.585739	-2.92007	2.95254	0.0031517	0.0190288	yes
TCONS_00020275	TCONS_00020275	p	XLOC_012362	AGAP003899	AGAP003899-RA	-	2R:45709778-45717130	448	-	Res	Sus	OK	9.55933	3.82752	15.2911	0	0	0	-1.79769e+308	-1.79769e+308	0.000425676	0.00391702	yes
TCONS_00020304	TCONS_00020304	p	XLOC_012395	CARM1_ANOGA	AGAP003923-RA	-	2R:46292730-46298747	878	-	Res	Sus	OK	8.03759	4.49852	11.5767	2.99798	1.27718	4.71878	-0.986189	2.72646	0.00640175	0.031784	yes
TCONS_00020313	TCONS_00020313	p	XLOC_012408	AGAP003939	AGAP003939-RA	-	2R:46554704-46556673	1039	-	Res	Sus	OK	11.2247	6.92772	15.5217	4.69237	2.51446	6.87027	-0.87218	2.89934	0.00373952	0.0215967	yes
TCONS_00020386	TCONS_00020386	p	XLOC_012486	AGAP013324	AGAP013324-RA	-	2R:48234840-48235267	427	-	Res	Sus	OK	7.9088	2.49129	13.3263	0.250974	0	0.752921	-3.45038	3.26423	0.0010976	0.00840791	yes
TCONS_00020424	TCONS_00020424	p	XLOC_012518	AGAP004052	AGAP004052-RA	-	2R:48850605-48947869	1310	-	Res	Sus	OK	1.82872	0.740365	2.91707	0.200579	0	0.500549	-2.21016	2.74624	0.00602829	0.030531	yes
TCONS_00020449	TCONS_00020449	p	XLOC_012550	AGAP013315	AGAP013315-RA	-	2R:49628884-49656671	565	-	Res	Sus	OK	16.2081	9.0843	23.3319	0.420095	0	1.14921	-3.65279	4.08047	4.49443e-05	0.000610741	yes
TCONS_00020480	TCONS_00020480	p	XLOC_012591	AGAP004152	AGAP004152-RA	-	2R:50772483-50773487	1004	-	Res	Sus	OK	4.88037	2.53304	7.22769	0.721503	0	1.46378	-1.91164	3.36654	0.000761188	0.00624621	yes
TCONS_00020505	TCONS_00020505	p	XLOC_012618	AGAP004186	AGAP004186-RA	-	2R:51407045-51496686	597	-	Res	Sus	OK	5.22226	2.03448	8.41003	0.440336	0	1.16546	-2.47315	2.8164	0.00485657	0.0261804	yes
TCONS_00020553	TCONS_00020553	p	XLOC_012669	AGAP004233	AGAP004233-RA	-	2R:52930009-52930115	106	-	Res	Sus	OK	8655.71	2773.11	14538.3	0	0	0	-1.79769e+308	-1.79769e+308	0.00162621	0.0115118	yes
TCONS_00020591	TCONS_00020591	p	XLOC_012716	AGAP004284	AGAP004284-RA	-	2R:53885914-53899082	281	-	Res	Sus	OK	69.0366	30.2254	107.848	15.8302	0	31.8338	-1.47272	2.5463	0.0108871	0.0456282	yes
TCONS_00020592	TCONS_00020592	p	XLOC_012717	AGAP004284	AGAP004284-RA	-	2R:53885914-53899082	779	-	Res	Sus	OK	11.6131	6.75782	16.4683	1.30616	0.10893	2.5034	-2.18504	4.33776	1.43945e-05	0.000228793	yes
TCONS_00020593	TCONS_00020593	p	XLOC_012718	AGAP013057	AGAP013057-RA	-	2R:53885914-53899082	1223	-	Res	Sus	OK	2.41104	1.07505	3.74703	0.33897	0	0.770712	-1.9619	2.82491	0.00472941	0.0257275	yes
TCONS_00020602	TCONS_00020602	p	XLOC_012727	AGAP004288	AGAP004288-RB	-	2R:54085225-54122392	1919	-	Res	Sus	OK	1.61044	0.757957	2.46293	0	0	0	-1.79769e+308	-1.79769e+308	7.89746e-05	0.000976351	yes
TCONS_00020612	TCONS_00020612	p	XLOC_012740	AGAP004312	AGAP004312-RB	-	2R:54328059-54453473	140	-	Res	Sus	OK	392.175	352.568	431.782	0	0	0	-1.79769e+308	-1.79769e+308	1.39094e-87	2.77703e-85	yes
TCONS_00020621	TCONS_00020621	p	XLOC_012762	AGAP004344	AGAP004344-RA	-	2R:54882081-54911626	1871	-	Res	Sus	OK	1.52874	0.697806	2.35966	0.318249	0	0.654231	-1.56936	2.6433	0.00821027	0.0378618	yes
TCONS_00020635	TCONS_00020635	p	XLOC_012781	AGAP004359	AGAP004359-RA	-	2R:55035883-55036415	532	-	Res	Sus	OK	10.3095	4.99419	15.6249	2.86352	0.446572	5.28047	-1.28102	2.59038	0.00958704	0.0421156	yes
TCONS_00020655	TCONS_00020655	p	XLOC_012811	AGAP004401	AGAP004401-RA	-	2R:55666340-55698426	967	-	Res	Sus	OK	3.45656	1.5791	5.33401	0	0	0	-1.79769e+308	-1.79769e+308	0.000115626	0.00133171	yes
TCONS_00020656	TCONS_00020656	p	XLOC_012812	AGAP004401	AGAP004401-RA	-	2R:55666340-55698426	1144	-	Res	Sus	OK	1.61423	0.522023	2.70644	0	0	0	-1.79769e+308	-1.79769e+308	0.00155877	0.0111417	yes
TCONS_00020675	TCONS_00020675	p	XLOC_012830	AGAP004421	AGAP004421-RA	-	2R:55860721-55884594	321	-	Res	Sus	OK	13.6191	2.49138	24.7469	0	0	0	-1.79769e+308	-1.79769e+308	0.007187	0.0344724	yes
TCONS_00020747	TCONS_00020747	p	XLOC_012920	AGAP004580	AGAP004580-RA	-	2R:57952943-57953129	186	-	Res	Sus	OK	159.943	24.9434	294.942	0	0	0	-1.79769e+308	-1.79769e+308	0.00890526	0.0402095	yes
TCONS_00020763	TCONS_00020763	p	XLOC_012940	AGAP004586	AGAP004586-RB	-	2R:58100822-58101075	253	-	Res	Sus	OK	64.7758	15.3473	114.204	0	0	0	-1.79769e+308	-1.79769e+308	0.00438377	0.0243547	yes
TCONS_00020824	TCONS_00020824	p	XLOC_013015	AGAP004659	AGAP004659-RA	-	2R:59729169-59775185	2154	-	Res	Sus	OK	0.83677	0.296102	1.37744	0.0940658	0	0.242568	-2.18555	2.56248	0.0103928	0.0445983	yes
TCONS_00020867	TCONS_00020867	p	XLOC_013068	AGAP004667	AGAP004667-RA	-	2R:60768465-60770166	657	-	Res	Sus	OK	4.85573	1.98945	7.72201	0.689648	0	1.62198	-1.95173	2.64615	0.00814149	0.0376154	yes
TCONS_00020898	TCONS_00020898	p	XLOC_013103	AGAP004671	AGAP004671-RA	-	2R:61193055-61193400	345	-	Res	Sus	OK	15.994	5.47861	26.5094	1.82868	0	4.70199	-2.16862	2.54644	0.0108827	0.0456268	yes
TCONS_00020910	TCONS_00020910	p	XLOC_013117	AGAP004674	AGAP004674-RA	-	2R:61299189-61302515	3326	-	Res	Sus	OK	4.04664	2.58897	5.5043	8.01209	5.39037	10.6338	0.683066	-2.80721	0.00499727	0.026759	yes
TCONS_00023078	TCONS_00023078	p	XLOC_009938	AGAP013012	AGAP013012-RA	-	2R:1663521-1745788	3672	-	Res	Sus	OK	1.02366	0.523704	1.52361	2.79717	1.76455	3.82979	1.00523	-3.28386	0.00102397	0.00797115	yes
TCONS_00023236	TCONS_00023236	p	XLOC_010366	AGAP001726	AGAP001726-RA	-	2R:8940271-8940733	200	-	Res	Sus	OK	0	0	0	162.298	29.4415	295.154	1.79769e+308	1.79769e+308	0.00727865	0.0348023	yes
TCONS_00023256	TCONS_00023256	p	XLOC_010400	AGAP001762	AGAP001762-RA	-	2R:9494631-9511895	3143	-	Res	Sus	OK	0	0	0	0.599201	0.243088	0.955314	1.79769e+308	1.79769e+308	0.000382403	0.00359991	yes
TCONS_00023257	TCONS_00023257	p	XLOC_010402	AGAP001764	AGAP001764-RA	-	2R:9531152-9536643	629	-	Res	Sus	OK	0	0	0	6.23205	2.9328	9.53131	1.79769e+308	1.79769e+308	7.9092e-05	0.000976707	yes
TCONS_00023385	TCONS_00023385	p	XLOC_010673	AGAP002053	AGAP002053-RA	-	2R:14658775-14682357	3582	-	Res	Sus	OK	0	0	0	0.724943	0.342965	1.10692	1.79769e+308	1.79769e+308	7.36037e-05	0.000919744	yes
TCONS_00023390	TCONS_00023390	p	XLOC_010682	AGAP002070	AGAP002070-RA	-	2R:14781538-14782133	595	-	Res	Sus	OK	0.147928	0	0.443783	2.34776	0.366138	4.32937	2.76449	-2.54697	0.0108664	0.0455974	yes
TCONS_00023515	TCONS_00023515	p	XLOC_011006	AGAP013402	AGAP013402-RA	-	2R:20615820-20616379	559	-	Res	Sus	OK	1.98134	0	4.01972	10.6139	5.52978	15.698	1.67839	-2.95793	0.00309708	0.0188226	yes
TCONS_00023546	TCONS_00023546	p	XLOC_011096	AGAP002467	AGAP002467-RA	-	2R:21834241-21834894	653	-	Res	Sus	OK	0.886802	0	2.03477	6.15335	2.94513	9.36156	1.93713	-2.77614	0.0055009	0.0285381	yes
TCONS_00023579	TCONS_00023579	p	XLOC_011170	GPRHIS	AGAP002566-RB	-	2R:22971678-22976780	1746	-	Res	Sus	OK	1.38417	0.580752	2.18758	5.54381	3.43903	7.64858	1.38758	-4.00125	6.30076e-05	0.000806757	yes
TCONS_00023592	TCONS_00023592	p	XLOC_011203	AGAP002591	AGAP002591-RA	-	2R:23658434-23660453	1972	-	Res	Sus	OK	2.41787	1.29583	3.53991	5.42088	3.40792	7.43385	0.80737	-2.71686	0.00659051	0.0323715	yes
TCONS_00023736	TCONS_00023736	p	XLOC_011607	AGAP003008	AGAP003008-RA	-	2R:31042507-31053330	1154	-	Res	Sus	OK	3.32611	1.62598	5.02623	9.44727	5.87931	13.0152	1.04392	-3.28518	0.00101918	0.00794089	yes
TCONS_00023771	TCONS_00023771	p	XLOC_011682	AGAP003081	AGAP003081-RA	-	2R:32295109-32297554	578	-	Res	Sus	OK	0	0	0	3.27265	0.874211	5.67108	1.79769e+308	1.79769e+308	0.00317648	0.0191522	yes
TCONS_00023773	TCONS_00023773	p	XLOC_011682	AGAP003081	AGAP003081-RA	-	2R:32295109-32297554	542	-	Res	Sus	OK	0	0	0	4.8107	1.70858	7.91283	1.79769e+308	1.79769e+308	0.000962546	0.0075624	yes
TCONS_00023826	TCONS_00023826	p	XLOC_011808	CLIPB19	AGAP003247-RA	-	2R:34457830-34458055	225	-	Res	Sus	OK	26.9571	0	63.873	179.577	66.3202	292.833	1.89635	-2.51559	0.0118832	0.0485527	yes
TCONS_00023936	TCONS_00023936	p	XLOC_012091	AGAP003627	AGAP003627-RA	-	2R:40516575-40777289	410	-	Res	Sus	OK	0	0	0	4.53066	0.521597	8.53971	1.79769e+308	1.79769e+308	0.0119041	0.0486024	yes
TCONS_00023939	TCONS_00023939	p	XLOC_012095	AGAP003630	AGAP003630-RA	-	2R:40516575-40777289	270	-	Res	Sus	OK	0	0	0	41.9284	10.8271	73.0297	1.79769e+308	1.79769e+308	0.00350624	0.0206743	yes
TCONS_00023958	TCONS_00023958	p	XLOC_012137	AGAP013146	AGAP013146-RB	-	2R:42045502-42098290	511	-	Res	Sus	OK	0.0583511	0.0574217	0.0592805	0.777886	0	1.95677	2.5901	-3.41796	0.000630913	0.00535548	yes
TCONS_00024005	TCONS_00024005	p	XLOC_012217	AGAP012979	AGAP012979-RA	-	2R:43164768-43328912	3336	-	Res	Sus	OK	0.105608	0	0.246976	1.47112	0.823658	2.11858	2.63405	-3.7386	0.000185048	0.00197601	yes
TCONS_00024047	TCONS_00024047	p	XLOC_012307	AGAP013233	AGAP013233-RA	-	2R:44704771-44715308	379	-	Res	Sus	OK	10.3982	3.13371	17.6628	0	0	0	-1.79769e+308	-1.79769e+308	0.00209995	0.0140282	yes
TCONS_00024050	TCONS_00024050	p	XLOC_012322	AGAP003880	AGAP003880-RA	-	2R:45242996-45244000	817	-	Res	Sus	OK	0	0	0	2.26328	0.737233	3.78932	1.79769e+308	1.79769e+308	0.00150751	0.0108403	yes
TCONS_00024070	TCONS_00024070	p	XLOC_012367	AGAP013070	AGAP013070-RA	-	2R:45785770-45786855	1085	-	Res	Sus	OK	0	0	0	1.52113	0.487336	2.55491	1.79769e+308	1.79769e+308	0.00162621	0.0115081	yes
TCONS_00024193	TCONS_00024193	p	XLOC_012689	AGAP004261	AGAP004261-RC	-	2R:53453281-53453840	559	-	Res	Sus	OK	0	0	0	3.78028	1.12152	6.43905	1.79769e+308	1.79769e+308	0.00223009	0.0146929	yes
TCONS_00024217	TCONS_00024217	p	XLOC_012742	AGAP012966	AGAP012966-RA	-	2R:54328059-54453473	373	-	Res	Sus	OK	0	0	0	6.74407	1.18267	12.3055	1.79769e+308	1.79769e+308	0.00764755	0.0359201	yes
TCONS_00024287	TCONS_00024287	p	XLOC_012910	AGAP013053	AGAP013053-RA	-	2R:57710257-57736487	2395	-	Res	Sus	OK	0	0	0	1.66752	0.884712	2.45032	1.79769e+308	1.79769e+308	1.02048e-05	0.000170814	yes
TCONS_00024321	TCONS_00024321	p	XLOC_012991	SCRB6	AGAP004643-RA	-	2R:58906830-58908645	1815	-	Res	Sus	OK	1.56852	0.712445	2.4246	4.76625	2.90596	6.62653	1.11143	-3.31283	0.000923585	0.00732542	yes
TCONS_00028499	TCONS_00028499	p	XLOC_015389	AGAP010317	AGAP010317-RA	-	3L:415391-416496	893	-	Res	Sus	OK	2.18947	0.691665	3.68728	0.153618	0	0.441084	-2.65694	2.66705	0.00765196	0.0359255	yes
TCONS_00028587	TCONS_00028587	p	XLOC_015500	AGAP010359	AGAP010359-RA	-	3L:2221806-2222158	352	-	Res	Sus	OK	9.93874	1.98814	17.8893	0	0	0	-1.79769e+308	-1.79769e+308	0.00620753	0.0311456	yes
TCONS_00028609	TCONS_00028609	p	XLOC_015530	AGAP010394	AGAP010394-RA	-	3L:2610942-2648914	638	-	Res	Sus	OK	8.73494	4.43633	13.0336	0	0	0	-1.79769e+308	-1.79769e+308	2.41117e-05	0.000356051	yes
TCONS_00028622	TCONS_00028622	p	XLOC_015544	OBP22	AGAP010409-RA	-	3L:2835509-2884683	138	-	Res	Sus	OK	747.387	136.817	1357.96	0	0	0	-1.79769e+308	-1.79769e+308	0.00717935	0.0344432	yes
TCONS_00028724	TCONS_00028724	p	XLOC_015671	GPRMAC1	AGAP010513-RA	-	3L:5443742-5529204	808	-	Res	Sus	OK	1.54334	0.19817	2.88852	0	0	0	-1.79769e+308	-1.79769e+308	0.0108769	0.0456244	yes
TCONS_00028741	TCONS_00028741	p	XLOC_015690	AGAP010541	AGAP010541-RA	-	3L:5898248-6025911	1527	-	Res	Sus	OK	2.45177	1.21512	3.68842	0	0	0	-1.79769e+308	-1.79769e+308	3.66692e-05	0.000512011	yes
TCONS_00028766	TCONS_00028766	p	XLOC_015719	AGAP010563	AGAP010563-RA	-	3L:6358804-6463191	262	-	Res	Sus	OK	40.7767	4.5149	77.0384	0	0	0	-1.79769e+308	-1.79769e+308	0.0122557	0.049693	yes
TCONS_00028769	TCONS_00028769	p	XLOC_015722	AGAP010572	AGAP010572-RA	-	3L:6358804-6463191	539	-	Res	Sus	OK	7.5052	3.23439	11.776	0.0155877	0.0153695	0.0158058	-6.17687	21.703	0	0	yes
TCONS_00028791	TCONS_00028791	p	XLOC_015755	AGAP010626	AGAP010626-RA	-	3L:7414961-7424168	1963	-	Res	Sus	OK	1.04319	0.401331	1.68505	0	0	0	-1.79769e+308	-1.79769e+308	0.000575959	0.00497028	yes
TCONS_00028875	TCONS_00028875	p	XLOC_015854	AGAP010748	AGAP010748-RA	-	3L:9767633-9768593	504	-	Res	Sus	OK	9.87806	4.53418	15.2219	1.9718	0	4.06804	-1.61137	2.70173	0.0068979	0.0334273	yes
TCONS_00028882	TCONS_00028882	p	XLOC_015862	AGAP010752	AGAP010752-RA	-	3L:9825047-9826129	306	-	Res	Sus	OK	22.3842	6.33155	38.4368	0	0	0	-1.79769e+308	-1.79769e+308	0.00264478	0.0167066	yes
TCONS_00028889	TCONS_00028889	p	XLOC_015869	AGAP010764	AGAP010764-RA	-	3L:10012973-10070959	1906	-	Res	Sus	OK	1.30867	0.562326	2.05501	0	0	0	-1.79769e+308	-1.79769e+308	0.000226693	0.00233974	yes
TCONS_00028975	TCONS_00028975	p	XLOC_015975	AGAP010867	AGAP010867-RA	-	3L:12157572-12166727	746	-	Res	Sus	OK	12.1924	7.07723	17.3075	4.70769	2.20365	7.21174	-0.951613	2.80941	0.00496323	0.0266317	yes
TCONS_00029031	TCONS_00029031	p	XLOC_016027	AGAP010926	AGAP010926-RA	-	3L:13231864-13232128	264	-	Res	Sus	OK	41.1561	5.42462	76.8877	0	0	0	-1.79769e+308	-1.79769e+308	0.0106217	0.0449553	yes
TCONS_00029042	TCONS_00029042	p	XLOC_016042	AGAP010958	AGAP010958-RA	-	3L:13830845-13854362	453	-	Res	Sus	OK	35.7876	21.4006	50.1746	14.4596	7.32154	21.5976	-0.906246	2.84698	0.00441365	0.0244223	yes
TCONS_00029126	TCONS_00029126	p	XLOC_016134	AGAP011070	AGAP011070-RA	-	3L:16239464-16265637	1955	-	Res	Sus	OK	5.50277	3.41284	7.59269	1.79996	0.917541	2.68238	-1.11749	3.60394	0.000313431	0.00305355	yes
TCONS_00029145	TCONS_00029145	p	XLOC_016154	AGAP011093	AGAP011093-RA	-	3L:16483296-16488317	305	-	Res	Sus	OK	22.5437	6.3003	38.7871	0	0	0	-1.79769e+308	-1.79769e+308	0.00275385	0.017245	yes
TCONS_00029154	TCONS_00029154	p	XLOC_016161	AGAP011095	AGAP011095-RA	-	3L:16661959-16702787	1799	-	Res	Sus	OK	5.1078	3.09598	7.11962	0.923434	0.329837	1.51703	-1.71042	4.53761	5.68949e-06	0.00010335	yes
TCONS_00029177	TCONS_00029177	p	XLOC_016183	AGAP011106	AGAP011106-RA	-	3L:17001041-17002115	646	-	Res	Sus	OK	3.75291	1.25153	6.2543	0	0	0	-1.79769e+308	-1.79769e+308	0.00134692	0.00991662	yes
TCONS_00029211	TCONS_00029211	p	XLOC_016217	AGAP011120	AGAP011120-RA	-	3L:17329490-17331499	1051	-	Res	Sus	OK	5.66644	3.09266	8.24022	2.10806	0.845189	3.37092	-0.988795	2.6305	0.00852596	0.038923	yes
TCONS_00029223	TCONS_00029223	p	XLOC_016231	AGAP011128	AGAP011128-RA	-	3L:17552298-17604829	4043	-	Res	Sus	OK	2.15106	1.3087	2.99342	0.902498	0.47346	1.33154	-0.86855	2.82037	0.00479688	0.0259537	yes
TCONS_00029228	TCONS_00029228	p	XLOC_016236	AGAP011134	AGAP011134-RA	-	3L:17740012-17775344	2045	-	Res	Sus	OK	2.04797	1.06224	3.03369	0.720247	0.234876	1.20562	-1.04501	2.52377	0.0116103	0.047725	yes
TCONS_00029237	TCONS_00029237	p	XLOC_016247	AGAP011141	AGAP011141-RA	-	3L:17850583-17857514	583	-	Res	Sus	OK	7.11652	3.18764	11.0454	0	0	0	-1.79769e+308	-1.79769e+308	0.000145791	0.00162197	yes
TCONS_00029259	TCONS_00029259	p	XLOC_016265	AGAP011182	AGAP011182-RA	-	3L:18297057-18297185	128	-	Res	Sus	OK	1348.42	295.246	2401.6	0	0	0	-1.79769e+308	-1.79769e+308	0.00522342	0.0276148	yes
TCONS_00029303	TCONS_00029303	p	XLOC_016315	AGAP011252	AGAP011252-RA	-	3L:20079866-20082210	252	-	Res	Sus	OK	56.3904	9.91338	102.867	0	0	0	-1.79769e+308	-1.79769e+308	0.00762067	0.0358358	yes
TCONS_00029323	TCONS_00029323	p	XLOC_016335	AGAP011286	AGAP011286-RA	-	3L:20568665-20568866	201	-	Res	Sus	OK	139.407	30.524	248.289	0	0	0	-1.79769e+308	-1.79769e+308	0.00522342	0.0275455	yes
TCONS_00029338	TCONS_00029338	p	XLOC_016351	AGAP011308	AGAP011308-RA	-	3L:20821166-20834803	1344	-	Res	Sus	OK	6.62187	3.96336	9.28037	1.78578	0.773875	2.79769	-1.31052	3.77424	0.000160494	0.00175763	yes
TCONS_00029355	TCONS_00029355	p	XLOC_016364	AGAP011314	AGAP011314-RA	-	3L:20881605-20881896	291	-	Res	Sus	OK	20.6241	2.71838	38.5299	0	0	0	-1.79769e+308	-1.79769e+308	0.0106217	0.0448778	yes
TCONS_00029490	TCONS_00029490	p	XLOC_016510	AGAP011411	AGAP011411-RA	-	3L:23907202-23946036	273	-	Res	Sus	OK	52.842	16.3238	89.3601	0	0	0	-1.79769e+308	-1.79769e+308	0.00190178	0.0129855	yes
TCONS_00029499	TCONS_00029499	p	XLOC_016514	AGAP011415	AGAP011415-RA	-	3L:24033632-24036332	553	-	Res	Sus	OK	18.3856	10.4881	26.283	7.33964	3.37124	11.308	-0.918275	2.65959	0.00782359	0.0364905	yes
TCONS_00029501	TCONS_00029501	p	XLOC_016516	AGAP011417	AGAP011417-RA	-	3L:24150170-24150288	118	-	Res	Sus	OK	2950.65	835.918	5065.39	0	0	0	-1.79769e+308	-1.79769e+308	0.00263081	0.0166613	yes
TCONS_00029540	TCONS_00029540	p	XLOC_016558	AGAP011453	AGAP011453-RA	-	3L:24916474-24922736	689	-	Res	Sus	OK	7.27508	3.62674	10.9234	1.63205	0.166356	3.09774	-1.49462	2.90613	0.00365928	0.021309	yes
TCONS_00029591	TCONS_00029591	p	XLOC_016612	AGAP011489	AGAP011489-RA	-	3L:25340848-25410922	326	-	Res	Sus	OK	19.5962	6.61547	32.5769	1.5214	0	4.22907	-2.5557	2.69163	0.00711032	0.0342088	yes
TCONS_00029595	TCONS_00029595	p	XLOC_016617	AGAP011495	AGAP011495-RA	-	3L:25449630-25450881	997	-	Res	Sus	OK	6.55529	3.64358	9.46699	2.03379	0.759822	3.30776	-1.17037	3.04824	0.00230187	0.0150311	yes
TCONS_00029722	TCONS_00029722	p	XLOC_016746	AGAP011566	AGAP011566-RA	-	3L:27865466-27902866	363	-	Res	Sus	OK	8.88443	1.74067	16.0282	0	0	0	-1.79769e+308	-1.79769e+308	0.00643534	0.0319077	yes
TCONS_00029832	TCONS_00029832	p	XLOC_016878	AGAP011645	AGAP011645-RA	-	3L:30670959-30671293	334	-	Res	Sus	OK	15.0504	4.26376	25.837	0	0	0	-1.79769e+308	-1.79769e+308	0.00263081	0.0166493	yes
TCONS_00029855	TCONS_00029855	p	XLOC_016905	AGAP011670	AGAP011670-RA	-	3L:31255061-31258432	638	-	Res	Sus	OK	4.57073	1.75285	7.38862	0	0	0	-1.79769e+308	-1.79769e+308	0.000589144	0.00506721	yes
TCONS_00029918	TCONS_00029918	p	XLOC_016965	AGAP011722	AGAP011722-RA	-	3L:32332949-32411253	177	-	Res	Sus	OK	332.837	116.205	549.468	0	0	0	-1.79769e+308	-1.79769e+308	0.00106017	0.00817794	yes
TCONS_00030057	TCONS_00030057	p	XLOC_017126	AGAP011894	AGAP011894-RA	-	3L:34663485-34671173	274	-	Res	Sus	OK	38.6972	7.98095	69.4135	0	0	0	-1.79769e+308	-1.79769e+308	0.00587348	0.0299567	yes
TCONS_00030066	TCONS_00030066	p	XLOC_017137	AGAP011911	AGAP011911-RA	-	3L:34861979-34881021	358	-	Res	Sus	OK	0	0	0	6.91811	0.928525	12.9077	1.79769e+308	1.79769e+308	0.0104428	0.0447521	yes
TCONS_00030089	TCONS_00030089	p	XLOC_017162	AGAP011940	AGAP011940-RA	-	3L:35410189-35424947	675	-	Res	Sus	OK	4.92517	2.08371	7.76663	0.874176	0	1.93273	-1.72883	2.57779	0.00994354	0.0431745	yes
TCONS_00030130	TCONS_00030130	p	XLOC_017200	AGAP011983	AGAP011983-RA	-	3L:35855047-35856016	558	-	Res	Sus	OK	7.84939	3.54755	12.1512	1.6054	0	3.32561	-1.58707	2.63733	0.00835613	0.0383541	yes
TCONS_00030137	TCONS_00030137	p	XLOC_017207	AGAP011994	AGAP011994-RA	-	3L:36003911-36015880	1265	-	Res	Sus	OK	6.09532	3.54444	8.6462	1.86485	0.795845	2.93385	-1.18434	3.33736	0.000845777	0.00681611	yes
TCONS_00030175	TCONS_00030175	p	XLOC_017242	AGAP012019	AGAP012019-RA	-	3L:36444781-36445117	336	-	Res	Sus	OK	25.5867	11.1192	40.0542	2.26113	0	5.68671	-2.42621	3.00076	0.00269305	0.0169388	yes
TCONS_00030195	TCONS_00030195	p	XLOC_017264	AGAP012034	AGAP012034-RA	-	3L:36767809-36793542	530	-	Res	Sus	OK	6.03243	2.23392	9.83095	0.778404	0	1.92411	-2.04766	2.55814	0.0105234	0.0449449	yes
TCONS_00030205	TCONS_00030205	p	XLOC_017274	AGAP012053	AGAP012053-RA	-	3L:36937771-36938053	282	-	Res	Sus	OK	25.9524	3.42068	48.4841	0	0	0	-1.79769e+308	-1.79769e+308	0.0106217	0.0450764	yes
TCONS_00030234	TCONS_00030234	p	XLOC_017304	AGAP012060	AGAP012060-RA	-	3L:37192710-37198321	1333	-	Res	Sus	OK	9.60364	6.04305	13.1642	4.53644	2.58834	6.48454	-0.75	2.64393	0.00819504	0.0378153	yes
TCONS_00030241	TCONS_00030241	p	XLOC_017311	AGAP012064	AGAP012064-RA	-	3L:37202691-37328265	266	-	Res	Sus	OK	64.6602	20.6682	108.652	0	0	0	-1.79769e+308	-1.79769e+308	0.00164301	0.0115751	yes
TCONS_00030328	TCONS_00030328	p	XLOC_017405	AGAP012176	AGAP012176-RA	-	3L:38339458-38342307	778	-	Res	Sus	OK	1.98854	0.419101	3.55799	0	0	0	-1.79769e+308	-1.79769e+308	0.00563722	0.0290777	yes
TCONS_00030388	TCONS_00030388	p	XLOC_017465	AGAP012238	AGAP012238-RA	-	3L:39208914-39237139	268	-	Res	Sus	OK	39.302	5.87021	72.7337	0	0	0	-1.79769e+308	-1.79769e+308	0.00935709	0.0414147	yes
TCONS_00030409	TCONS_00030409	p	XLOC_017489	AGAP012253	AGAP012253-RA	-	3L:39404440-39405398	958	-	Res	Sus	OK	5.48577	2.8803	8.09123	1.72815	0.535143	2.92115	-1.15511	2.75701	0.00583318	0.0298167	yes
TCONS_00030410	TCONS_00030410	p	XLOC_017490	AGAP012253	AGAP012253-RA	-	3L:39405618-39405992	374	-	Res	Sus	OK	11.4666	3.67367	19.2596	0	0	0	-1.79769e+308	-1.79769e+308	0.00162621	0.0114971	yes
TCONS_00030464	TCONS_00030464	p	XLOC_017549	AGAP012329	AGAP012329-RA	-	3L:40693661-40693750	89	-	Res	Sus	OK	109331	25903.8	192759	0	0	0	-1.79769e+308	-1.79769e+308	0.00438377	0.0243977	yes
TCONS_00030465	TCONS_00030465	p	XLOC_017550	AGAP012329	AGAP012329-RA	-	3L:40694126-40694309	183	-	Res	Sus	OK	217.938	55.3349	380.542	0	0	0	-1.79769e+308	-1.79769e+308	0.00367439	0.0213463	yes
TCONS_00030512	TCONS_00030512	p	XLOC_017598	AGAP012386	AGAP012386-RA	-	3L:41414622-41432021	503	-	Res	Sus	OK	10.3134	4.80886	15.8179	0	0	0	-1.79769e+308	-1.79769e+308	8.93958e-05	0.00107565	yes
TCONS_00030549	TCONS_00030549	p	XLOC_017634	AGAP012420	AGAP012420-RA	-	3L:41853179-41853447	268	-	Res	Sus	OK	48.7988	11.5618	86.0358	0	0	0	-1.79769e+308	-1.79769e+308	0.00438377	0.0243916	yes
TCONS_00032387	TCONS_00032387	p	XLOC_015467	AGAP010334	AGAP010334-RA	-	3L:1609968-1652697	852	-	Res	Sus	OK	0	0	0	2.48949	0.922006	4.05697	1.79769e+308	1.79769e+308	0.000745532	0.0061383	yes
TCONS_00032411	TCONS_00032411	p	XLOC_015515	AGAP010387	AGAP010387-RA	-	3L:2441913-2442207	294	-	Res	Sus	OK	1.13348	0	3.40043	28.0361	9.60352	46.4687	3.2082	-3.04775	0.0023056	0.0150511	yes
TCONS_00032495	TCONS_00032495	p	XLOC_015769	TOLL1B	AGAP010636-RA	-	3L:7771044-7771900	717	-	Res	Sus	OK	0	0	0	1.64393	0.21668	3.07118	1.79769e+308	1.79769e+308	0.0106217	0.0451589	yes
TCONS_00032503	TCONS_00032503	p	XLOC_015778	AGAP010638	AGAP010638-RA	-	3L:7823843-7895148	482	-	Res	Sus	OK	0	0	0	3.79142	0.73309	6.84975	1.79769e+308	1.79769e+308	0.00658008	0.0323419	yes
TCONS_00032571	TCONS_00032571	p	XLOC_015950	AGAP010834	AGAP010834-RA	-	3L:11718794-11719278	484	-	Res	Sus	OK	0	0	0	3.82129	0.764407	6.87817	1.79769e+308	1.79769e+308	0.00620753	0.0312166	yes
TCONS_00032596	TCONS_00032596	p	XLOC_016016	AGAP010909	AGAP010909-RA	-	3L:12856420-12890922	1823	-	Res	Sus	OK	0	0	0	1.83147	0.91748	2.74547	1.79769e+308	1.79769e+308	3.06658e-05	0.000440022	yes
TCONS_00032600	TCONS_00032600	p	XLOC_016028	AGAP010926	AGAP010926-RA	-	3L:13232203-13232713	510	-	Res	Sus	OK	0	0	0	2.92914	0.386078	5.47221	1.79769e+308	1.79769e+308	0.0106217	0.0451154	yes
TCONS_00032632	TCONS_00032632	p	XLOC_016116	AGAP011043	AGAP011043-RA	-	3L:15669143-15729556	3282	-	Res	Sus	OK	0.481937	0.157861	0.806013	0	0	0	-1.79769e+308	-1.79769e+308	0.00146866	0.0106111	yes
TCONS_00032640	TCONS_00032640	p	XLOC_016140	AGAP011074	AGAP011074-RA	-	3L:16283321-16284394	1073	-	Res	Sus	OK	0.186319	0	0.504405	2.48011	1.09589	3.86432	2.5886	-2.88241	0.0039464	0.0225116	yes
TCONS_00032677	TCONS_00032677	p	XLOC_016217	AGAP011120	AGAP011120-RA	-	3L:17329490-17331499	878	-	Res	Sus	OK	0.468229	0	1.11963	3.17588	1.39069	4.96108	1.91438	-2.55173	0.010719	0.0451596	yes
TCONS_00032705	TCONS_00032705	p	XLOC_016275	AGAP011194	AGAP011194-RA	-	3L:18961021-19046104	769	-	Res	Sus	OK	5.01426	2.33417	7.69435	11.8481	7.03254	16.6637	0.859884	-2.56118	0.0104318	0.0447268	yes
TCONS_00032710	TCONS_00032710	p	XLOC_016289	AGAP011214	AGAP011214-RA	-	3L:19423023-19444218	665	-	Res	Sus	OK	0	0	0	2.43223	0.593509	4.27096	1.79769e+308	1.79769e+308	0.00407772	0.0230787	yes
TCONS_00032753	TCONS_00032753	p	XLOC_016378	AGAP011333	AGAP011333-RA	-	3L:21152807-21295252	1121	-	Res	Sus	OK	0.682555	0	1.39535	5.79209	3.31798	8.2662	2.13841	-3.79054	0.000150317	0.00166394	yes
TCONS_00032824	TCONS_00032824	p	XLOC_016560	AGAP011455	AGAP011455-RA	-	3L:24929481-24930097	616	-	Res	Sus	OK	0	0	0	4.06044	1.49958	6.6213	1.79769e+308	1.79769e+308	0.000759178	0.00623552	yes
TCONS_00032861	TCONS_00032861	p	XLOC_016640	AGAP011505	AGAP011505-RA	-	3L:25723810-25724603	793	-	Res	Sus	OK	6.43461	3.29116	9.57806	23.4196	15.1958	31.6434	1.29188	-4.29459	1.75015e-05	0.000270953	yes
TCONS_00032929	TCONS_00032929	p	XLOC_016802	AGAP011585	AGAP011585-RA	-	3L:28428208-28428531	323	-	Res	Sus	OK	0	0	0	20.5242	7.90878	33.1396	1.79769e+308	1.79769e+308	0.000569307	0.00492733	yes
TCONS_00032948	TCONS_00032948	p	XLOC_016842	AGAP011620	AGAP011620-RA	-	3L:30027863-30028609	746	-	Res	Sus	OK	0	0	0	1.54873	0.204132	2.89333	1.79769e+308	1.79769e+308	0.0106217	0.0452548	yes
TCONS_00032950	TCONS_00032950	p	XLOC_016847	AGAP011628	AGAP011628-RA	-	3L:30326694-30338836	126	-	Res	Sus	OK	0	0	0	1609.32	279.818	2938.82	1.79769e+308	1.79769e+308	0.00774028	0.0362476	yes
TCONS_00032958	TCONS_00032958	p	XLOC_016860	AGAP011636	AGAP011636-RA	-	3L:30461276-30514627	1045	-	Res	Sus	OK	0	0	0	1.71139	0.586278	2.8365	1.79769e+308	1.79769e+308	0.00117439	0.00887292	yes
TCONS_00032970	TCONS_00032970	p	XLOC_016894	AGAP011666	AGAP011666-RA	-	3L:31102193-31130950	1001	-	Res	Sus	OK	0.661743	0	1.4087	5.51269	3.02951	7.99587	2.11993	-3.48866	0.000485454	0.004343	yes
TCONS_00033015	TCONS_00033015	p	XLOC_017047	CLIPE6	AGAP011785-RA	-	3L:33257074-33260430	1619	-	Res	Sus	OK	8.72996	5.56973	11.8902	3.88121	2.24457	5.51784	-0.810615	2.91719	0.00353197	0.0207816	yes
TCONS_00033041	TCONS_00033041	p	XLOC_017088	TPX4	AGAP011824-RA	-	3L:33857757-33858703	946	-	Res	Sus	OK	0.440544	0	1.04384	3.12487	1.41936	4.83039	1.95914	-2.65793	0.00786214	0.0366161	yes
TCONS_00033123	TCONS_00033123	p	XLOC_017261	AGAP012032	AGAP012032-RA	-	3L:36751589-36752950	1361	-	Res	Sus	OK	0	0	0	1.71729	0.735603	2.69897	1.79769e+308	1.79769e+308	0.000233805	0.00239744	yes
TCONS_00033170	TCONS_00033170	p	XLOC_017389	AGAP012161	AGAP012161-RA	-	3L:38177547-38177859	312	-	Res	Sus	OK	0.811525	0	2.43457	12.2925	1.91704	22.668	2.71783	-2.50398	0.0122806	0.0497481	yes
TCONS_00033202	TCONS_00033202	p	XLOC_017467	AGAP012239	AGAP012239-RA	-	3L:39241992-39247383	274	-	Res	Sus	OK	0	0	0	29.01	4.84023	53.1798	1.79769e+308	1.79769e+308	0.00818592	0.0377851	yes
TCONS_00038418	TCONS_00038418	p	XLOC_020463	AGAP007802	AGAP007802-RA	-	3R:1224677-1225958	1281	-	Res	Sus	OK	5.95052	3.46298	8.43806	1.36542	0.480294	2.25055	-1.47202	3.81674	0.000135225	0.00152207	yes
TCONS_00038419	TCONS_00038419	p	XLOC_020464	AGAP007802	AGAP007802-RA	-	3R:1226052-1226644	592	-	Res	Sus	OK	9.84865	4.99585	14.7015	1.05247	0	2.34268	-2.23619	3.38509	0.000711541	0.00591138	yes
TCONS_00038429	TCONS_00038429	p	XLOC_020477	AGAP007815	AGAP007815-RA	-	3R:1330153-1371529	476	-	Res	Sus	OK	5.68859	1.63029	9.7469	0.400683	0	1.18141	-2.65305	2.55717	0.0105526	0.045039	yes
TCONS_00038466	TCONS_00038466	p	XLOC_020509	AGAP007854	AGAP007854-RA	-	3R:2140336-2140721	385	-	Res	Sus	OK	19.1968	8.94622	29.4473	0.979122	0	2.65069	-2.97584	3.32724	0.0008771	0.00701346	yes
TCONS_00038469	TCONS_00038469	p	XLOC_020511	AGAP013721	AGAP013721-RA	-	3R:2245656-2387203	227	-	Res	Sus	OK	100.878	25.829	175.927	0	0	0	-1.79769e+308	-1.79769e+308	0.00359062	0.0210146	yes
TCONS_00038491	TCONS_00038491	p	XLOC_020543	AGAP007907	AGAP007907-RA	-	3R:2641113-2641570	376	-	Res	Sus	OK	11.2861	3.61583	18.9564	0	0	0	-1.79769e+308	-1.79769e+308	0.00162621	0.0114897	yes
TCONS_00038501	TCONS_00038501	p	XLOC_020558	AGAP007931	AGAP007931-RA	-	3R:3046563-3049371	205	-	Res	Sus	OK	104.926	13.7023	196.151	0	0	0	-1.79769e+308	-1.79769e+308	0.0107125	0.0451408	yes
TCONS_00038527	TCONS_00038527	p	XLOC_020590	DRM_ANOGA	AGAP007974-RA	-	3R:3588288-3604623	1083	-	Res	Sus	OK	3.11064	1.44512	4.77617	0.508633	0	1.09279	-1.81086	2.85813	0.00426147	0.0238524	yes
TCONS_00038534	TCONS_00038534	p	XLOC_020599	AGAP007989	AGAP007989-RA	-	3R:3834443-3834545	102	-	Res	Sus	OK	8420.44	1313.19	15527.7	0	0	0	-1.79769e+308	-1.79769e+308	0.00890526	0.0401807	yes
TCONS_00038570	TCONS_00038570	p	XLOC_020645	AGAP008047	AGAP008047-RA	-	3R:4856857-4861192	320	-	Res	Sus	OK	18.2712	5.26492	31.2774	0	0	0	-1.79769e+308	-1.79769e+308	0.00248017	0.0159198	yes
TCONS_00038578	TCONS_00038578	p	XLOC_020658	AGAP008076	AGAP008076-RA	-	3R:5102191-5120495	3164	-	Res	Sus	OK	3.6024	2.26465	4.94015	0.60189	0.246087	0.957692	-1.78928	5.12612	2.9578e-07	7.69952e-06	yes
TCONS_00038597	TCONS_00038597	p	XLOC_020682	AGAP008103	AGAP008103-RB	-	3R:5783277-5784268	852	-	Res	Sus	OK	3.63071	1.56647	5.69494	0.257204	0	0.679928	-2.64731	3.04447	0.00233091	0.0151803	yes
TCONS_00038600	TCONS_00038600	p	XLOC_020686	AGAP008121	AGAP008121-RA	-	3R:5876958-5904349	203	-	Res	Sus	OK	115.323	18.0007	212.646	0	0	0	-1.79769e+308	-1.79769e+308	0.00889599	0.0402376	yes
TCONS_00038653	TCONS_00038653	p	XLOC_020752	AGAP008200	AGAP008200-RA	-	3R:6696034-6752610	364	-	Res	Sus	OK	8.46893	1.52434	15.4135	0	0	0	-1.79769e+308	-1.79769e+308	0.00736394	0.0350961	yes
TCONS_00038663	TCONS_00038663	p	XLOC_020756	AGAP008201	AGAP008201-RA	-	3R:6770386-6786189	373	-	Res	Sus	OK	8.85578	2.01671	15.6949	0	0	0	-1.79769e+308	-1.79769e+308	0.00480213	0.0259631	yes
TCONS_00038667	TCONS_00038667	p	XLOC_020761	AGAP008209	AGAP008209-RA	-	3R:6918281-6922631	92	-	Res	Sus	OK	89672.5	38088.9	141256	0	0	0	-1.79769e+308	-1.79769e+308	0.000253736	0.00256603	yes
TCONS_00038688	TCONS_00038688	p	XLOC_020788	AGAP008242	AGAP008242-RA	-	3R:7595216-7597743	1217	-	Res	Sus	OK	5.98472	3.43596	8.53349	1.55352	0.575203	2.53183	-1.34869	3.54812	0.000387992	0.0036401	yes
TCONS_00038704	TCONS_00038704	p	XLOC_020796	AGAP008247	AGAP008247-RA	-	3R:7802964-7803217	253	-	Res	Sus	OK	101.58	38.769	164.391	9.39943	0	25.4463	-2.3802	2.62173	0.00874837	0.0397124	yes
TCONS_00038707	TCONS_00038707	p	XLOC_020800	AGAP008248	AGAP008248-RA	-	3R:7803371-7840677	562	-	Res	Sus	OK	3.43588	0.753184	6.11857	0	0	0	-1.79769e+308	-1.79769e+308	0.00521086	0.0276013	yes
TCONS_00038729	TCONS_00038729	p	XLOC_020825	AGAP013772	AGAP013772-RA	-	3R:8731054-8731397	343	-	Res	Sus	OK	10.3448	1.85265	18.8369	0.466518	0	1.39955	-3.09894	2.86684	0.00414587	0.0233565	yes
TCONS_00038742	TCONS_00038742	p	XLOC_020839	AGAP008307	AGAP008307-RA	-	3R:8803845-8861388	172	-	Res	Sus	OK	248.56	50.9689	446.151	0	0	0	-1.79769e+308	-1.79769e+308	0.0059364	0.0301834	yes
TCONS_00038775	TCONS_00038775	p	XLOC_020870	AGAP008336	AGAP008336-RA	-	3R:9401899-9408449	309	-	Res	Sus	OK	16.3705	3.01144	29.7295	0	0	0	-1.79769e+308	-1.79769e+308	0.00712605	0.0342695	yes
TCONS_00038803	TCONS_00038803	p	XLOC_020895	AGAP008356	AGAP008356-RA	-	3R:9859129-9859389	260	-	Res	Sus	OK	60.107	15.2613	104.953	0	0	0	-1.79769e+308	-1.79769e+308	0.00367439	0.0213716	yes
TCONS_00038829	TCONS_00038829	p	XLOC_020923	AGAP008387	AGAP008387-RA	-	3R:10243367-10250253	174	-	Res	Sus	OK	205.685	30.3647	381.006	0	0	0	-1.79769e+308	-1.79769e+308	0.00947813	0.0417702	yes
TCONS_00038862	TCONS_00038862	p	XLOC_020954	AGAP008415	AGAP008415-RA	-	3R:10509994-10517546	1622	-	Res	Sus	OK	3.9454	2.23951	5.6513	0.385122	0	0.787335	-2.32675	4.11688	3.8403e-05	0.00053335	yes
TCONS_00038872	TCONS_00038872	p	XLOC_020960	AGAP008418	AGAP008418-RA	-	3R:10559043-10559147	104	-	Res	Sus	OK	7170.94	1284.25	13057.6	0	0	0	-1.79769e+308	-1.79769e+308	0.00741872	0.035073	yes
TCONS_00038961	TCONS_00038961	p	XLOC_021056	AGAP008538	AGAP008538-RA	-	3R:12149368-12218601	2360	-	Res	Sus	OK	2.08803	1.13321	3.04286	0.726871	0.272971	1.18077	-1.05523	2.72674	0.00639641	0.0317682	yes
TCONS_00038993	TCONS_00038993	p	XLOC_021096	AGAP008588	AGAP008588-RA	-	3R:13324606-13392311	1561	-	Res	Sus	OK	7.29572	4.54353	10.0479	3.38735	1.88887	4.88582	-0.767241	2.63938	0.00830568	0.0381662	yes
TCONS_00038997	TCONS_00038997	p	XLOC_021100	AGAP008589	AGAP008589-RA	-	3R:13324606-13392311	398	-	Res	Sus	OK	7.34876	1.66434	13.0332	0	0	0	-1.79769e+308	-1.79769e+308	0.00486079	0.0261967	yes
TCONS_00039011	TCONS_00039011	p	XLOC_021118	AGAP008613	AGAP008613-RA	-	3R:13594127-13675631	3635	-	Res	Sus	OK	0.747691	0.343112	1.15227	3.49055	2.24793	4.73316	1.54082	-4.75777	1.95742e-06	4.09324e-05	yes
TCONS_00039057	TCONS_00039057	p	XLOC_021171	AGAP008676	AGAP008676-RA	-	3R:14680292-14723741	290	-	Res	Sus	OK	24.3914	4.69765	44.0851	0	0	0	-1.79769e+308	-1.79769e+308	0.00662327	0.0324782	yes
TCONS_00039107	TCONS_00039107	p	XLOC_021227	AGAP008711	AGAP008711-RA	-	3R:15868650-15880799	756	-	Res	Sus	OK	4.83504	2.19598	7.4741	0.779011	0	1.70022	-1.82562	2.80341	0.00505652	0.0270009	yes
TCONS_00039110	TCONS_00039110	p	XLOC_021230	AGAP008712	AGAP008712-RA	-	3R:15927722-15928031	309	-	Res	Sus	OK	15.5476	2.52358	28.5715	0	0	0	-1.79769e+308	-1.79769e+308	0.00848106	0.0387903	yes
TCONS_00039211	TCONS_00039211	p	XLOC_021332	AGAP008810	AGAP008810-RA	-	3R:18131741-18133635	561	-	Res	Sus	OK	9.03494	4.32685	13.743	0.613672	0	1.55986	-2.68939	3.3049	0.000950112	0.00748603	yes
TCONS_00039271	TCONS_00039271	p	XLOC_021403	AGAP008825	AGAP008825-RA	-	3R:18671122-18909298	664	-	Res	Sus	OK	12.752	7.20281	18.3012	4.54647	1.94279	7.15015	-1.03134	2.86779	0.00413355	0.023302	yes
TCONS_00039272	TCONS_00039272	p	XLOC_021404	AGAP008825	AGAP008825-RA	-	3R:18671122-18909298	880	-	Res	Sus	OK	10.1476	5.93188	14.3633	1.33235	0.22553	2.43916	-2.0303	4.37179	1.2323e-05	0.000200638	yes
TCONS_00039289	TCONS_00039289	p	XLOC_021422	AGAP008831	AGAP008831-RA	-	3R:19120390-19120650	260	-	Res	Sus	OK	65.3337	18.509	112.158	5.1309	0	14.8916	-2.54423	2.50309	0.0123114	0.0498407	yes
TCONS_00039309	TCONS_00039309	p	XLOC_021451	AGAP008855	AGAP008855-RA	-	3R:19491469-19495801	1029	-	Res	Sus	OK	1.80583	0.569777	3.04188	0.181547	0	0.488483	-2.29726	2.51897	0.01177	0.048193	yes
TCONS_00039336	TCONS_00039336	p	XLOC_021489	AGAP008872	AGAP008872-RA	-	3R:20191323-20228996	4754	-	Res	Sus	OK	1.07447	0.594809	1.55413	0	0	0	-1.79769e+308	-1.79769e+308	3.73e-06	7.19627e-05	yes
TCONS_00039351	TCONS_00039351	p	XLOC_021513	AGAP008911	AGAP008911-RA	-	3R:20648623-20649042	419	-	Res	Sus	OK	8.73271	2.90019	14.5652	0	0	0	-1.79769e+308	-1.79769e+308	0.00137453	0.0100845	yes
TCONS_00039411	TCONS_00039411	p	XLOC_021571	AGAP008944	AGAP008944-RA	-	3R:21413780-21415408	1496	-	Res	Sus	OK	10.586	6.81182	14.3602	5.08184	3.02907	7.13461	-0.733859	2.72417	0.00644637	0.0319552	yes
TCONS_00039524	TCONS_00039524	p	XLOC_021680	AGAP009001	AGAP009001-RA	-	3R:23003908-23006472	582	-	Res	Sus	OK	9.64092	4.81518	14.4667	0.609497	0	1.53278	-2.76114	3.46141	0.00053736	0.00469596	yes
TCONS_00039533	TCONS_00039533	p	XLOC_021688	AGAP009003	AGAP009003-RA	-	3R:23170586-23171314	728	-	Res	Sus	OK	12.3942	7.16037	17.628	4.44143	2.00028	6.88257	-1.02625	2.96126	0.00306386	0.0186696	yes
TCONS_00039534	TCONS_00039534	p	XLOC_021689	AGAP009003	AGAP009003-RA	-	3R:23171367-23173073	1706	-	Res	Sus	OK	9.48302	6.13908	12.827	4.46604	2.67349	6.2586	-0.753001	2.8188	0.00482037	0.0260361	yes
TCONS_00039578	TCONS_00039578	p	XLOC_021730	AGAP009034	AGAP009034-RA	-	3R:24366803-24397407	3469	-	Res	Sus	OK	2.36354	1.42586	3.30121	0.390167	0.123368	0.656966	-1.80134	4.55713	5.1858e-06	9.56176e-05	yes
TCONS_00039586	TCONS_00039586	p	XLOC_021745	AGAP009040	AGAP009040-RA	-	3R:24533934-24538873	356	-	Res	Sus	OK	16.955	6.58973	27.3202	1.66202	0	4.2641	-2.32253	2.7637	0.00571498	0.0293895	yes
TCONS_00039587	TCONS_00039587	p	XLOC_021746	AGAP009041	AGAP009041-RA	-	3R:24533934-24538873	331	-	Res	Sus	OK	16.1866	4.79713	27.5761	0	0	0	-1.79769e+308	-1.79769e+308	0.00223891	0.0147071	yes
TCONS_00039672	TCONS_00039672	p	XLOC_021851	AGAP009136	AGAP009136-RA	-	3R:26867272-26874382	2972	-	Res	Sus	OK	1.84619	1.031	2.66138	0.136316	0	0.302067	-2.6059	4.02885	5.60511e-05	0.00073496	yes
TCONS_00039678	TCONS_00039678	p	XLOC_021856	AGAP009137	AGAP009137-RA	-	3R:26949108-26949418	310	-	Res	Sus	OK	15.0843	2.35243	27.8162	0	0	0	-1.79769e+308	-1.79769e+308	0.00890526	0.0400088	yes
TCONS_00039736	TCONS_00039736	p	XLOC_021930	AGAP009202	AGAP009202-RA	-	3R:28656718-28656943	225	-	Res	Sus	OK	104.459	26.9591	181.959	5.44172	0	16.3251	-2.9547	2.77023	0.00560159	0.0289413	yes
TCONS_00039767	TCONS_00039767	p	XLOC_021969	AGAP009240	AGAP009240-RA	-	3R:29201271-29204712	301	-	Res	Sus	OK	23.3088	6.17472	40.443	0	0	0	-1.79769e+308	-1.79769e+308	0.00325669	0.0195264	yes
TCONS_00039856	TCONS_00039856	p	XLOC_022054	AGAP009308	AGAP009308-RA	-	3R:31137022-31137979	957	-	Res	Sus	OK	17.5287	11.2042	23.8531	8.20422	4.82823	11.5802	-0.759189	2.77444	0.00552976	0.0286339	yes
TCONS_00039946	TCONS_00039946	p	XLOC_022150	AGAP009426	AGAP009426-RA	-	3R:33181547-33183395	446	-	Res	Sus	OK	8.97718	3.42844	14.5259	0.764	0	2.0259	-2.46387	2.7942	0.0052029	0.027579	yes
TCONS_00039947	TCONS_00039947	p	XLOC_022150	AGAP009426	AGAP009426-RA	-	3R:33181547-33183395	302	-	Res	Sus	OK	19.7117	4.11316	35.3102	0	0	0	-1.79769e+308	-1.79769e+308	0.00574589	0.0294901	yes
TCONS_00039972	TCONS_00039972	p	XLOC_022180	AGAP009471	AGAP009471-RA	-	3R:34020536-34020862	326	-	Res	Sus	OK	13.2883	2.65818	23.9184	0	0	0	-1.79769e+308	-1.79769e+308	0.00620753	0.0310538	yes
TCONS_00040136	TCONS_00040136	p	XLOC_022374	AGAP009641	AGAP009641-RA	-	3R:37482083-37483055	706	-	Res	Sus	OK	7.18197	3.61316	10.7508	1.22756	0	2.47145	-1.76654	3.13054	0.00174485	0.0121375	yes
TCONS_00040152	TCONS_00040152	p	XLOC_022390	AGAP009662	AGAP009662-RA	-	3R:37752823-37755525	1560	-	Res	Sus	OK	6.93223	4.28541	9.57905	1.76142	0.81796	2.70487	-1.37006	4.16572	3.10369e-05	0.000444623	yes
TCONS_00040203	TCONS_00040203	p	XLOC_022445	AGAP009712	AGAP009712-RA	-	3R:39505438-39505853	284	-	Res	Sus	OK	56.8147	23.4413	90.188	0	0	0	-1.79769e+308	-1.79769e+308	0.000331074	0.0031944	yes
TCONS_00040223	TCONS_00040223	p	XLOC_022465	AGAP009717	AGAP009717-RA	-	3R:40255997-40258539	536	-	Res	Sus	OK	14.4326	7.72429	21.1409	2.97839	0.531646	5.42513	-1.57811	3.34389	0.000826123	0.00668581	yes
TCONS_00040224	TCONS_00040224	p	XLOC_022465	AGAP009717	AGAP009717-RA	-	3R:40255997-40258539	1457	-	Res	Sus	OK	5.02489	2.9192	7.13059	0.162735	0	0.412228	-3.43004	4.31624	1.58709e-05	0.000249118	yes
TCONS_00040309	TCONS_00040309	p	XLOC_022569	AGAP009784	AGAP009784-RA	-	3R:43273677-43278443	516	-	Res	Sus	OK	3.37331	0.497308	6.24932	0	0	0	-1.79769e+308	-1.79769e+308	0.00949231	0.0417826	yes
TCONS_00040327	TCONS_00040327	p	XLOC_022595	AGAP009811	AGAP009811-RA	-	3R:43754901-43767789	701	-	Res	Sus	OK	5.19482	2.31769	8.07196	1.19388	0	2.42428	-1.47046	2.51363	0.0119497	0.0487072	yes
TCONS_00040344	TCONS_00040344	p	XLOC_022616	AGAP009830	AGAP009830-RA	-	3R:44029942-44042359	854	-	Res	Sus	OK	5.71478	2.91634	8.51322	1.62207	0.375284	2.86885	-1.25935	2.76365	0.00571588	0.0293907	yes
TCONS_00040352	TCONS_00040352	p	XLOC_022626	AGAP009841	AGAP009841-RA	-	3R:44094718-44105918	1743	-	Res	Sus	OK	3.86355	2.21674	5.51036	1.31113	0.568544	2.05371	-1.0807	3.0492	0.00229451	0.0150008	yes
TCONS_00040404	TCONS_00040404	p	XLOC_022688	AGAP009930	AGAP009930-RA	-	3R:45430486-45435595	1213	-	Res	Sus	OK	2.65505	1.22871	4.08139	0	0	0	-1.79769e+308	-1.79769e+308	9.8483e-05	0.00116311	yes
TCONS_00040420	TCONS_00040420	p	XLOC_022706	AGAP009939	AGAP009939-RA	-	3R:45720924-45769254	1577	-	Res	Sus	OK	1.38406	0.542705	2.22542	0	0	0	-1.79769e+308	-1.79769e+308	0.000500811	0.0044542	yes
TCONS_00040425	TCONS_00040425	p	XLOC_022711	AGAP009947	AGAP009947-RA	-	3R:45822185-45908988	566	-	Res	Sus	OK	3.80079	0.997643	6.60393	0	0	0	-1.79769e+308	-1.79769e+308	0.00334592	0.0199206	yes
TCONS_00040426	TCONS_00040426	p	XLOC_022712	AGAP009947	AGAP009947-RA	-	3R:45822185-45908988	214	-	Res	Sus	OK	93.4713	13.6363	173.306	0	0	0	-1.79769e+308	-1.79769e+308	0.00960034	0.042153	yes
TCONS_00040441	TCONS_00040441	p	XLOC_022732	AGAP009960	AGAP009960-RA	-	3R:46576254-46584043	481	-	Res	Sus	OK	5.59455	1.61113	9.57798	0	0	0	-1.79769e+308	-1.79769e+308	0.00248542	0.0159419	yes
TCONS_00040455	TCONS_00040455	p	XLOC_022748	AGAP009979	AGAP009979-RA	-	3R:47080021-47085151	620	-	Res	Sus	OK	5.17689	2.08341	8.27037	0	0	0	-1.79769e+308	-1.79769e+308	0.000408499	0.00378978	yes
TCONS_00040473	TCONS_00040473	p	XLOC_022773	AGAP010007	AGAP010007-RA	-	3R:47555233-47561001	695	-	Res	Sus	OK	4.0573	1.57568	6.53893	0.281515	0	0.790891	-2.66809	2.79382	0.00520889	0.0275942	yes
TCONS_00040550	TCONS_00040550	p	XLOC_022856	AGAP010091	AGAP010091-RA	-	3R:48843314-48843874	560	-	Res	Sus	OK	4.27909	1.2695	7.28867	0	0	0	-1.79769e+308	-1.79769e+308	0.00223009	0.0146797	yes
TCONS_00040561	TCONS_00040561	p	XLOC_022868	CPR155	AGAP013367-RA	-	3R:49144227-49144517	290	-	Res	Sus	OK	29.8125	8.02794	51.5971	0	0	0	-1.79769e+308	-1.79769e+308	0.00309983	0.0187876	yes
TCONS_00040639	TCONS_00040639	p	XLOC_022968	AGAP010234	AGAP010234-RA	-	3R:51340461-51340748	287	-	Res	Sus	OK	24.0739	3.75437	44.3933	0	0	0	-1.79769e+308	-1.79769e+308	0.00890526	0.0401437	yes
TCONS_00040644	TCONS_00040644	p	XLOC_022976	AGAP010242	AGAP010242-RA	-	3R:51454228-51517641	755	-	Res	Sus	OK	5.10435	2.36511	7.84358	0	0	0	-1.79769e+308	-1.79769e+308	9.69463e-05	0.00114803	yes
TCONS_00040661	TCONS_00040661	p	XLOC_022999	AGAP010275	AGAP010275-RA	-	3R:51937066-51945830	663	-	Res	Sus	OK	5.61588	2.49209	8.73968	0.990433	0	2.14229	-1.73521	2.69199	0.00710263	0.0341867	yes
TCONS_00040695	TCONS_00040695	p	XLOC_023038	AGAP010294	AGAP010294-RA	-	3R:52416889-52417408	519	-	Res	Sus	OK	9.47901	4.38539	14.5726	0.541575	0	1.44501	-2.86235	3.26644	0.00108908	0.00835714	yes
TCONS_00040729	TCONS_00040729	p	XLOC_023079	AGAP010302	AGAP010302-RA	-	3R:52850250-52854888	1578	-	Res	Sus	OK	0.713119	0.120198	1.30604	0	0	0	-1.79769e+308	-1.79769e+308	0.0080764	0.0373577	yes
TCONS_00042743	TCONS_00042743	p	XLOC_020412	AGAP007737	AGAP007737-RA	-	3R:154872-160501	5629	-	Res	Sus	OK	0.789441	0.425324	1.15356	3.68615	2.45881	4.91348	1.54101	-5.41792	6.02949e-08	1.89217e-06	yes
TCONS_00042751	TCONS_00042751	p	XLOC_020428	AGAP007758	AGAP007758-RA	-	3R:325316-325458	142	-	Res	Sus	OK	0	0	0	761.293	136.341	1386.25	1.79769e+308	1.79769e+308	0.00741872	0.0352581	yes
TCONS_00042754	TCONS_00042754	p	XLOC_020449	AGAP007782	AGAP007782-RA	-	3R:773830-789869	794	-	Res	Sus	OK	0.232147	0	0.653374	3.3687	1.41333	5.32407	2.67491	-2.8082	0.00498189	0.0267058	yes
TCONS_00042781	TCONS_00042781	p	XLOC_020496	AGAP013759	AGAP013759-RA	-	3R:1973629-2033203	2439	-	Res	Sus	OK	0	0	0	0.571223	0.17973	0.962716	1.79769e+308	1.79769e+308	0.00176044	0.0122266	yes
TCONS_00042796	TCONS_00042796	p	XLOC_020524	AGAP007889	AGAP007889-RA	-	3R:2537633-2537811	178	-	Res	Sus	OK	0	0	0	228.719	30.1464	427.291	1.79769e+308	1.79769e+308	0.0106217	0.0448606	yes
TCONS_00042800	TCONS_00042800	p	XLOC_020532	AGAP007895	AGAP007895-RA	-	3R:2537926-2594892	1019	-	Res	Sus	OK	0	0	0	0.960859	0.108856	1.81286	1.79769e+308	1.79769e+308	0.0120501	0.0490621	yes
TCONS_00042821	TCONS_00042821	p	XLOC_020578	AGAP007950	AGAP007950-RA	-	3R:3272201-3272810	609	-	Res	Sus	OK	0	0	0	2.2574	0.352047	4.16276	1.79769e+308	1.79769e+308	0.00890526	0.0400292	yes
TCONS_00042855	TCONS_00042855	p	XLOC_020654	AGAP008061	AGAP008061-RA	-	3R:4940677-4941774	1097	-	Res	Sus	OK	0.422438	0	0.969288	3.535	1.79317	5.27682	2.12442	-3.06751	0.0021585	0.014326	yes
TCONS_00042906	TCONS_00042906	p	XLOC_020783	AGAP008232	AGAP008232-RA	-	3R:7435483-7435853	282	-	Res	Sus	OK	0	0	0	21.0414	2.77338	39.3095	1.79769e+308	1.79769e+308	0.0106217	0.0449165	yes
TCONS_00042949	TCONS_00042949	p	XLOC_020865	AGAP008334	AGAP008334-RA	-	3R:9397823-9401169	3346	-	Res	Sus	OK	1.73491	0.981697	2.48812	3.53111	2.25991	4.80231	0.710657	-2.52009	0.0117324	0.0480658	yes
TCONS_00043003	TCONS_00043003	p	XLOC_020991	AGAP008486	AGAP008486-RA	-	3R:11139508-11224102	1833	-	Res	Sus	OK	1.2143	0.489555	1.93905	3.17812	1.82161	4.53464	0.962121	-2.62244	0.00873038	0.0396429	yes
TCONS_00043051	TCONS_00043051	p	XLOC_021107	AGAP008593	AGAP008593-RA	-	3R:13450968-13466849	318	-	Res	Sus	OK	0	0	0	14.8026	3.90932	25.6959	1.79769e+308	1.79769e+308	0.00328639	0.0196458	yes
TCONS_00043072	TCONS_00043072	p	XLOC_021158	AGAP008656	AGAP008656-RA	-	3R:14275257-14464870	1736	-	Res	Sus	OK	0	0	0	2.70662	1.4761	3.93714	1.79769e+308	1.79769e+308	5.43372e-06	9.94409e-05	yes
TCONS_00043078	TCONS_00043078	p	XLOC_021182	AGAP008693	AGAP008693-RA	-	3R:14948253-14948576	323	-	Res	Sus	OK	0	0	0	11.1417	1.99537	20.288	1.79769e+308	1.79769e+308	0.00741872	0.0352695	yes
TCONS_00043182	TCONS_00043182	p	XLOC_021390	AGAP008824	AGAP008824-RA	-	3R:18671122-18909298	146	-	Res	Sus	OK	20.2495	14.1396	26.3594	311.745	0	674.001	2.73406	-4.55462	5.24814e-06	9.66864e-05	yes
TCONS_00043259	TCONS_00043259	p	XLOC_021540	AGAP008925	AGAP008925-RA	-	3R:21066548-21067395	847	-	Res	Sus	OK	2.90976	1.10021	4.71932	20.2417	13.0831	27.4003	1.93967	-5.42251	5.87692e-08	1.8522e-06	yes
TCONS_00043277	TCONS_00043277	p	XLOC_021574	AGAP008947	AGAP008947-RA	-	3R:21530216-21534390	169	-	Res	Sus	OK	0	0	0	578.546	220.691	936.402	1.79769e+308	1.79769e+308	0.000611606	0.00522072	yes
TCONS_00043322	TCONS_00043322	p	XLOC_021660	AGAP008980	AGAP008980-RA	-	3R:22546701-22547375	674	-	Res	Sus	OK	0	0	0	2.87279	0.889595	4.85598	1.79769e+308	1.79769e+308	0.00188294	0.0128808	yes
TCONS_00043327	TCONS_00043327	p	XLOC_021666	AGAP008989	AGAP008989-RA	-	3R:22773900-22774818	918	-	Res	Sus	OK	0.764975	0	1.61849	5.28926	2.80288	7.77563	1.93359	-3.19409	0.00140272	0.0102488	yes
TCONS_00043362	TCONS_00043362	p	XLOC_021753	AGAP009042	AGAP009042-RA	-	3R:24663149-24665762	2613	-	Res	Sus	OK	1.32043	0.654156	1.9867	3.93061	2.47146	5.38976	1.09084	-3.48269	0.000496394	0.00442116	yes
TCONS_00043388	TCONS_00043388	p	XLOC_021809	AGAP009110	AGAP009110-RA	-	3R:25661999-25662597	598	-	Res	Sus	OK	0	0	0	2.71576	0.594633	4.83688	1.79769e+308	1.79769e+308	0.00522342	0.0275191	yes
TCONS_00043431	TCONS_00043431	p	XLOC_021928	GSTE5	AGAP009192-RA	-	3R:28592939-28593445	506	-	Res	Sus	OK	0	0	0	3.32397	0.595291	6.05264	1.79769e+308	1.79769e+308	0.00741872	0.0352847	yes
TCONS_00043444	TCONS_00043444	p	XLOC_021949	AGAP009223	AGAP009223-RA	-	3R:28869818-28870299	481	-	Res	Sus	OK	11.4734	5.38067	17.5661	2.90243	0.221316	5.58355	-1.37448	2.57996	0.00988125	0.0430141	yes
TCONS_00043494	TCONS_00043494	p	XLOC_022095	AGAP009365	AGAP009365-RA	-	3R:31796723-31862455	1521	-	Res	Sus	OK	1.92199	0.873061	2.97092	5.73341	3.49467	7.97214	1.09295	-3.25741	0.00112432	0.00857538	yes
TCONS_00043495	TCONS_00043495	p	XLOC_022099	AGAP009377	AGAP009377-RA	-	3R:31796723-31862455	125	-	Res	Sus	OK	0	0	0	1625.91	249.648	3002.17	1.79769e+308	1.79769e+308	0.00906893	0.0404763	yes
TCONS_00043546	TCONS_00043546	p	XLOC_022227	GPRGBB3	AGAP009514-RA	-	3R:35041427-35081059	5419	-	Res	Sus	OK	0	0	0	0.375536	0.161849	0.589222	1.79769e+308	1.79769e+308	0.000220015	0.00228417	yes
TCONS_00043573	TCONS_00043573	p	XLOC_022312	AGAP009576	AGAP009576-RA	-	3R:36435741-36476556	2752	-	Res	Sus	OK	0.695303	0.262939	1.12767	3.43676	2.13944	4.73407	1.59794	-4.3933	1.11645e-05	0.000184291	yes
TCONS_00043587	TCONS_00043587	p	XLOC_022356	AGAP009623	AGAP009623-RA	-	3R:37156973-37163645	3633	-	Res	Sus	OK	0	0	0	0.579489	0.25123	0.907748	1.79769e+308	1.79769e+308	0.000207246	0.00216844	yes
TCONS_00043613	TCONS_00043613	p	XLOC_022407	AGAP009672	AGAP009672-RA	-	3R:38173180-38222772	452	-	Res	Sus	OK	0	0	0	8.62991	3.55843	13.7014	1.79769e+308	1.79769e+308	0.000332878	0.0032048	yes
TCONS_00043635	TCONS_00043635	p	XLOC_022465	AGAP009717	AGAP009717-RA	-	3R:40255997-40258539	1221	-	Res	Sus	OK	0.738534	0.0327794	1.44429	2.86038	1.41733	4.30343	1.35404	-2.50607	0.012208	0.0495541	yes
TCONS_00043658	TCONS_00043658	p	XLOC_022534	AGAP009765	AGAP009765-RA	-	3R:42481819-42481974	155	-	Res	Sus	OK	0	0	0	478.218	85.6444	870.792	1.79769e+308	1.79769e+308	0.00741872	0.0352543	yes
TCONS_00043726	TCONS_00043726	p	XLOC_022696	AGAP009933	AGAP009933-RA	-	3R:45597261-45597871	610	-	Res	Sus	OK	0	0	0	3.75202	1.28522	6.21882	1.79769e+308	1.79769e+308	0.00117499	0.0088653	yes
TCONS_00044820	TCONS_00044820	p	XLOC_023964	AGAP012443	AGAP012443-RA	-	UNKN:1199464-1199930	466	-	Res	Sus	OK	40.8103	25.1706	56.4499	8.67896	3.71765	13.6403	-1.54803	4.49866	6.83833e-06	0.000121224	yes
TCONS_00045052	TCONS_00045052	p	XLOC_024263	AGAP012490	AGAP012490-RA	-	UNKN:7154344-7154972	628	-	Res	Sus	OK	4.99665	1.992	8.0013	0.516473	0	1.30838	-2.2695	2.75594	0.00585239	0.029901	yes
TCONS_00045087	TCONS_00045087	p	XLOC_024304	AGAP012497	AGAP012497-RA	-	UNKN:8213312-8213672	360	-	Res	Sus	OK	7.37837	0.776412	13.9803	0.397444	0	1.19233	-2.92125	2.66656	0.00766325	0.0359555	yes
TCONS_00045277	TCONS_00045277	p	XLOC_024569	AGAP012553	AGAP012553-RA	-	UNKN:15578161-15578264	103	-	Res	Sus	OK	7128.57	939.587	13317.5	0	0	0	-1.79769e+308	-1.79769e+308	0.0106217	0.0449036	yes
TCONS_00045286	TCONS_00045286	p	XLOC_024580	AGAP012559	AGAP012559-RA	-	UNKN:16236565-16236651	86	-	Res	Sus	OK	484261	96871.1	871651	0	0	0	-1.79769e+308	-1.79769e+308	0.00620753	0.0310961	yes
TCONS_00045302	TCONS_00045302	p	XLOC_024597	AGAP012570	AGAP012570-RA	-	UNKN:17015280-17015868	588	-	Res	Sus	OK	3.92556	1.16462	6.68651	0.266189	0	0.77257	-2.69106	2.65365	0.00796252	0.0369394	yes
TCONS_00045304	TCONS_00045304	p	XLOC_024600	AGAP012573	AGAP012573-RA	-	UNKN:17179136-17179228	92	-	Res	Sus	OK	43368.2	8675.34	78061.1	0	0	0	-1.79769e+308	-1.79769e+308	0.00620753	0.031206	yes
TCONS_00045309	TCONS_00045309	p	XLOC_024607	GPRMGL3	AGAP012578-RA	-	UNKN:17273332-17273605	273	-	Res	Sus	OK	46.9391	12.6398	81.2385	1.62436	0	4.87308	-3.36374	3.15947	0.00158058	0.0112611	yes
TCONS_00045392	TCONS_00045392	p	XLOC_024704	AGAP012621	AGAP012621-RA	-	UNKN:21147487-21148098	611	-	Res	Sus	OK	10.3213	5.37736	15.2653	0.374177	0	1.01298	-3.31724	3.74165	0.000182813	0.00195831	yes
TCONS_00045492	TCONS_00045492	p	XLOC_024807	AGAP012686	AGAP012686-RA	-	UNKN:23586724-23586882	158	-	Res	Sus	OK	327.924	51.1405	604.708	0	0	0	-1.79769e+308	-1.79769e+308	0.00890526	0.0401069	yes
TCONS_00045711	TCONS_00045711	p	XLOC_025072	AGAP012780	AGAP012780-RA	-	UNKN:28635288-28635403	115	-	Res	Sus	OK	3500.3	942.565	6058.04	0	0	0	-1.79769e+308	-1.79769e+308	0.00309983	0.0188083	yes
TCONS_00048649	TCONS_00048649	p	XLOC_026316	AGAP001493	AGAP001493-RA	-	X:1645350-1645754	404	-	Res	Sus	OK	2.70616	0.898732	4.51358	0	0	0	-1.79769e+308	-1.79769e+308	0.00137453	0.0100912	yes
TCONS_00049622	TCONS_00049622	p	XLOC_026858	KIBRLG	AGAP000002-RA	-	X:0-22688	536	-	Res	Sus	OK	9.92103	4.77092	15.0711	2.29255	0.145311	4.43978	-1.46499	2.73612	0.00621675	0.0310788	yes
TCONS_00049651	TCONS_00049651	p	XLOC_026894	AGAP000025	AGAP000025-RA	-	X:328364-336942	1452	-	Res	Sus	OK	0.729314	0.0986813	1.35995	0	0	0	-1.79769e+308	-1.79769e+308	0.0103624	0.0445114	yes
TCONS_00049772	TCONS_00049772	p	XLOC_027031	AGAP013490	AGAP013490-RA	-	X:1443309-1497419	244	-	Res	Sus	OK	58.0672	7.83902	108.295	0	0	0	-1.79769e+308	-1.79769e+308	0.0103851	0.0445827	yes
TCONS_00049825	TCONS_00049825	p	XLOC_027095	AGAP000121	AGAP000121-RA	-	X:1965588-1965856	268	-	Res	Sus	OK	42.1444	7.54767	76.7412	1.93494	0	5.80482	-3.08103	2.85027	0.00436822	0.0243296	yes
TCONS_00049861	TCONS_00049861	p	XLOC_027134	AGAP000147	AGAP000147-RA	-	X:2329974-2334904	275	-	Res	Sus	OK	45.9851	12.9229	79.0473	0	0	0	-1.79769e+308	-1.79769e+308	0.0027035	0.0169875	yes
TCONS_00049884	TCONS_00049884	p	XLOC_027162	AGAP000164	AGAP000164-RA	-	X:2849288-2851178	270	-	Res	Sus	OK	35.4745	4.48525	66.4638	0	0	0	-1.79769e+308	-1.79769e+308	0.011026	0.0459916	yes
TCONS_00049890	TCONS_00049890	p	XLOC_027169	AGAP000167	AGAP000167-RA	-	X:2871676-2871945	269	-	Res	Sus	OK	36.8201	4.85311	68.7872	0	0	0	-1.79769e+308	-1.79769e+308	0.0106217	0.0449812	yes
TCONS_00049914	TCONS_00049914	p	XLOC_027199	AGAP000190	AGAP000190-RA	-	X:3158060-3158616	417	-	Res	Sus	OK	7.31311	1.96928	12.6569	0.58226	0	1.66723	-2.53051	2.52857	0.0114527	0.0472268	yes
TCONS_00049939	TCONS_00049939	p	XLOC_027227	AGAP000202	AGAP000202-RA	-	X:3336829-3337066	237	-	Res	Sus	OK	63.9783	8.43271	119.524	0	0	0	-1.79769e+308	-1.79769e+308	0.0106217	0.0452156	yes
TCONS_00050026	TCONS_00050026	p	XLOC_027329	AGAP000232	AGAP000232-RA	-	X:4336947-4373485	7364	-	Res	Sus	OK	1.84591	1.18797	2.50385	0.523022	0.280177	0.765867	-1.2611	4.30893	1.6405e-05	0.000256044	yes
TCONS_00050142	TCONS_00050142	p	XLOC_027472	AGAP000312	AGAP000312-RA	-	X:5491513-5503956	2275	-	Res	Sus	OK	0.561817	0.135692	0.987942	0	0	0	-1.79769e+308	-1.79769e+308	0.00418379	0.0235161	yes
TCONS_00050196	TCONS_00050196	p	XLOC_027532	AGAP013397	AGAP013397-RA	-	X:6062988-6097582	85	-	Res	Sus	OK	1120000	1120000	1130000	0	0	0	-1.79769e+308	-1.79769e+308	0	0	yes
TCONS_00050234	TCONS_00050234	p	XLOC_027583	AGAP000376	AGAP000376-RA	-	X:6873114-6876076	382	-	Res	Sus	OK	11.065	3.64708	18.4829	0	0	0	-1.79769e+308	-1.79769e+308	0.0014257	0.0103635	yes
TCONS_00050255	TCONS_00050255	p	XLOC_027604	AGAP000387	AGAP000387-RA	-	X:7113183-7115886	1170	-	Res	Sus	OK	4.40709	2.3479	6.46627	0.231593	0	0.576944	-2.94599	3.77042	0.000162971	0.00178166	yes
TCONS_00050257	TCONS_00050257	p	XLOC_027605	TRAF6	AGAP000388-RA	-	X:7120879-7123053	1139	-	Res	Sus	OK	1.58323	0.499612	2.66685	0.105215	0	0.305597	-2.71121	2.67941	0.00737523	0.0351233	yes
TCONS_00050271	TCONS_00050271	p	XLOC_027617	AGAP000398	AGAP000398-RA	-	X:7249105-7249409	304	-	Res	Sus	OK	16.7212	2.6077	30.8346	0	0	0	-1.79769e+308	-1.79769e+308	0.00890526	0.0400578	yes
TCONS_00050331	TCONS_00050331	p	XLOC_027686	AGAP000452	AGAP000452-RA	-	X:7901529-7901802	273	-	Res	Sus	OK	37.1602	6.65504	67.6653	0	0	0	-1.79769e+308	-1.79769e+308	0.00741872	0.0351446	yes
TCONS_00050338	TCONS_00050338	p	XLOC_027693	AGAP000458	AGAP000458-RA	-	X:7948346-7949342	766	-	Res	Sus	OK	13.5619	8.07469	19.0491	2.26921	0.670833	3.86759	-1.78783	4.40183	1.07341e-05	0.000178322	yes
TCONS_00050390	TCONS_00050390	p	XLOC_027748	AGAP000478	AGAP000478-RA	-	X:8421829-8422574	745	-	Res	Sus	OK	10.9375	6.20981	15.6651	4.47292	2.04782	6.89802	-0.894153	2.57908	0.00990629	0.0430806	yes
TCONS_00050393	TCONS_00050393	p	XLOC_027752	AGAP000481	AGAP000481-RA	-	X:8436834-8437113	279	-	Res	Sus	OK	59.7118	23.453	95.9705	8.07622	0	19.136	-2.0006	2.671	0.0075625	0.0356002	yes
TCONS_00050572	TCONS_00050572	p	XLOC_027973	AGAP000587	AGAP000587-RA	-	X:10339720-10512777	542	-	Res	Sus	OK	6.70152	2.73003	10.673	0.53546	0	1.42772	-2.52696	2.85761	0.00426851	0.0238797	yes
TCONS_00050621	TCONS_00050621	p	XLOC_028022	AGAP000614	AGAP000614-RA	-	X:11189269-11197934	1577	-	Res	Sus	OK	2.32504	1.14843	3.50165	0.42067	0	0.849261	-1.70964	3.00573	0.0026494	0.0167262	yes
TCONS_00050632	TCONS_00050632	p	XLOC_028040	AGAP000636	AGAP000636-RA	-	X:11401569-11402468	627	-	Res	Sus	OK	9.79362	5.09616	14.4911	0.560169	0	1.39661	-2.86125	3.64874	0.000263525	0.00264864	yes
TCONS_00050648	TCONS_00050648	p	XLOC_028061	AGAP000648	AGAP000648-RA	-	X:11595733-11599292	172	-	Res	Sus	OK	206.241	26.1684	386.313	0	0	0	-1.79769e+308	-1.79769e+308	0.010992	0.045889	yes
TCONS_00050759	TCONS_00050759	p	XLOC_028190	AGAP013205	AGAP013205-RA	-	X:13416178-13416496	318	-	Res	Sus	OK	17.789	4.79023	30.7877	0.626662	0	1.87999	-3.34593	3.14274	0.00167376	0.0117485	yes
TCONS_00050777	TCONS_00050777	p	XLOC_028209	AGAP000741	AGAP000741-RA	-	X:13492703-13492977	274	-	Res	Sus	OK	31.7334	3.89267	59.5741	0	0	0	-1.79769e+308	-1.79769e+308	0.0113146	0.046806	yes
TCONS_00050851	TCONS_00050851	p	XLOC_028296	AGAP000795	AGAP000795-RA	-	X:14458984-14527321	784	-	Res	Sus	OK	1.96283	0.411878	3.51379	0	0	0	-1.79769e+308	-1.79769e+308	0.00568483	0.0292857	yes
TCONS_00050934	TCONS_00050934	p	XLOC_028388	AGAP000854	AGAP000854-RA	-	X:15753725-15754028	303	-	Res	Sus	OK	17.029	2.6557	31.4022	0.789172	0	2.36752	-3.07169	2.82999	0.00465493	0.0254069	yes
TCONS_00050936	TCONS_00050936	p	XLOC_028390	AGAP000854	AGAP000854-RA	-	X:15754123-15780302	339	-	Res	Sus	OK	13.7635	3.74389	23.783	0	0	0	-1.79769e+308	-1.79769e+308	0.00300425	0.0183953	yes
TCONS_00050961	TCONS_00050961	p	XLOC_028420	AGAP000886	AGAP000886-RA	-	X:16653566-16758310	328	-	Res	Sus	OK	13.3903	2.85367	23.9268	0	0	0	-1.79769e+308	-1.79769e+308	0.00551622	0.0285772	yes
TCONS_00050963	TCONS_00050963	p	XLOC_028422	AGAP000890	AGAP000890-RA	-	X:16761965-16762245	280	-	Res	Sus	OK	38.7165	10.4256	67.0074	0	0	0	-1.79769e+308	-1.79769e+308	0.00309983	0.0187722	yes
TCONS_00050966	TCONS_00050966	p	XLOC_028425	AGAP000893	AGAP000893-RA	-	X:16799843-16815765	2363	-	Res	Sus	OK	3.33339	1.98616	4.68062	1.29821	0.640914	1.95551	-0.943002	2.91122	0.00360024	0.0210513	yes
TCONS_00051114	TCONS_00051114	p	XLOC_028605	AGAP001013	AGAP001013-RA	-	X:19405366-19405726	360	-	Res	Sus	OK	8.30066	1.29451	15.3068	0	0	0	-1.79769e+308	-1.79769e+308	0.00890526	0.0402177	yes
TCONS_00051116	TCONS_00051116	p	XLOC_028606	AGAP001014	AGAP001014-RA	-	X:19410730-19413958	1075	-	Res	Sus	OK	3.38935	1.61915	5.15954	0.157425	0	0.429923	-3.06945	3.3953	0.000685541	0.00573206	yes
TCONS_00051120	TCONS_00051120	p	XLOC_028609	AGAP001015	AGAP001015-RA	-	X:19493084-19539421	399	-	Res	Sus	OK	30.6602	16.8241	44.4964	2.23961	0	5.04821	-2.61667	3.92661	8.61524e-05	0.00104231	yes
TCONS_00051123	TCONS_00051123	p	XLOC_028613	AGAP001018	AGAP001018-RA	-	X:19574000-19574613	613	-	Res	Sus	OK	11.1083	5.90739	16.3091	2.60499	0.57038	4.6396	-1.45026	3.1852	0.00144656	0.0104788	yes
TCONS_00051126	TCONS_00051126	p	XLOC_028616	GPRCCK1	AGAP001022-RA	-	X:19642450-19643412	505	-	Res	Sus	OK	5.37011	1.65486	9.08536	0.502624	0	1.37257	-2.36876	2.54164	0.0110334	0.046014	yes
TCONS_00052371	TCONS_00052371	p	XLOC_026947	CPR130	AGAP000047-RA	-	X:751395-751805	410	-	Res	Sus	OK	1.27185	0	3.27024	15.7812	7.64483	23.9176	2.51835	-3.04576	0.00232089	0.0151263	yes
TCONS_00052642	TCONS_00052642	p	XLOC_027621	AGAP013640	AGAP013640-RA	-	X:7249587-7270283	2235	-	Res	Sus	OK	0	0	0	0.748549	0.274488	1.22261	1.79769e+308	1.79769e+308	0.000794194	0.00647132	yes
TCONS_00052679	TCONS_00052679	p	XLOC_027693	AGAP000458	AGAP000458-RA	-	X:7948346-7949342	291	-	Res	Sus	OK	0	0	0	22.9957	5.88007	40.1113	1.79769e+308	1.79769e+308	0.00360378	0.0210609	yes
TCONS_00052680	TCONS_00052680	p	XLOC_027697	AGAP000461	AGAP000461-RB	-	X:7972695-8010986	3238	-	Res	Sus	OK	5.08272	3.31563	6.84981	1.67501	0.958566	2.39146	-1.11003	4.02768	5.63304e-05	0.000737309	yes
TCONS_00052690	TCONS_00052690	p	XLOC_027711	AGAP000462	AGAP000462-RB	-	X:8015695-8016218	370	-	Res	Sus	OK	0	0	0	6.10507	0.755293	11.4549	1.79769e+308	1.79769e+308	0.0112339	0.0465772	yes
TCONS_00052827	TCONS_00052827	p	XLOC_027992	AGAP013410	AGAP013410-RA	-	X:10640382-10640699	317	-	Res	Sus	OK	0	0	0	14.6139	3.71048	25.5172	1.79769e+308	1.79769e+308	0.00367439	0.0213295	yes
TCONS_00052908	TCONS_00052908	p	XLOC_028130	AGAP000689	AGAP000689-RA	-	X:12424938-12425800	862	-	Res	Sus	OK	0	0	0	1.77523	0.478035	3.07242	1.79769e+308	1.79769e+308	0.00309983	0.0188264	yes
TCONS_00052997	TCONS_00052997	p	XLOC_028346	AGAP013506	AGAP013506-RA	-	X:15468826-15470856	2030	-	Res	Sus	OK	1.52282	0.720301	2.32535	3.62974	2.17172	5.08775	0.868593	-2.62166	0.00875033	0.0397131	yes
TCONS_00053040	TCONS_00053040	p	XLOC_028448	AGAP000909	AGAP000909-RA	-	X:17150204-17152212	585	-	Res	Sus	OK	0	0	0	2.35013	0.339486	4.36078	1.79769e+308	1.79769e+308	0.00970169	0.0424923	yes
TCONS_00053051	TCONS_00053051	p	XLOC_028482	AGAP000930	AGAP000930-RA	-	X:17570358-17588863	1021	-	Res	Sus	OK	1.10985	0.13853	2.08116	6.94309	4.02545	9.86074	1.83353	-3.7772	0.000158601	0.00173906	yes
TCONS_00000010	TCONS_00000010	j	XLOC_000006	AGAP004686	AGAP004686-RB	TSS8	2L:742003-789602	3118	-	Res	Sus	OK	16.2634	11.1455	21.3814	4.91463	3.23918	6.59008	-1.1967	5.15875	2.48604e-07	6.59204e-06	yes
TCONS_00000022	TCONS_00000022	j	XLOC_000011	AGAP004692	AGAP004692-RD	TSS15	2L:1411006-1441380	4232	-	Res	Sus	OK	1.05499	0.579597	1.53038	0	0	0	-1.79769e+308	-1.79769e+308	4.53178e-06	8.51964e-05	yes
TCONS_00000024	TCONS_00000024	j	XLOC_000011	AGAP004692	AGAP004692-RD	TSS15	2L:1411006-1441380	5403	-	Res	Sus	OK	1.70626	1.06211	2.3504	0	0	0	-1.79769e+308	-1.79769e+308	5.86225e-08	1.84889e-06	yes
TCONS_00000039	TCONS_00000039	j	XLOC_000019	AGAP004700	AGAP004700-RB	TSS27	2L:2013633-2015127	978	-	Res	Sus	OK	1.48056	0.528345	2.43278	0	0	0	-1.79769e+308	-1.79769e+308	0.000936344	0.00739737	yes
TCONS_00000044	TCONS_00000044	j	XLOC_000020	AGAP004701	AGAP004701-RA	TSS29	2L:2074971-2131593	3293	-	Res	Sus	OK	0.606465	0.253587	0.959344	0	0	0	-1.79769e+308	-1.79769e+308	0.000293828	0.00289194	yes
TCONS_00000046	TCONS_00000046	j	XLOC_000020	AGAP004701	AGAP004701-RA	TSS30	2L:2074971-2131593	3620	-	Res	Sus	OK	4.52355	2.96839	6.0787	1.59127	0.944492	2.23804	-1.04477	3.92512	8.66876e-05	0.00104764	yes
TCONS_00000050	TCONS_00000050	j	XLOC_000021	AGAP004702	AGAP004702-RA	TSS34	2L:2131703-2165634	2745	-	Res	Sus	OK	2.81073	1.72302	3.89845	0.106593	0	0.241144	-3.27218	4.95682	7.16566e-07	1.69528e-05	yes
TCONS_00000054	TCONS_00000054	j	XLOC_000022	AGAP004703	AGAP004703-RA	TSS37	2L:2248610-2255495	4596	-	Res	Sus	OK	1.29833	0.763857	1.8328	0.0748039	0	0.164877	-2.85396	4.48545	7.27617e-06	0.000127856	yes
TCONS_00000059	TCONS_00000059	j	XLOC_000024	AGAP004707	AGAP004707-RC	TSS40	2L:2358143-2441042	15578	-	Res	Sus	OK	7.84006	5.40468	10.2755	3.01285	2.06964	3.95607	-0.956359	4.337	1.44438e-05	0.000229411	yes
TCONS_00000066	TCONS_00000066	j	XLOC_000029	AGAP004715	AGAP004715-RA	TSS47	2L:2615645-2620736	2740	-	Res	Sus	OK	1.92332	1.10994	2.7367	0.152156	0	0.319432	-2.5369	4.30748	1.65122e-05	0.000257536	yes
TCONS_00000072	TCONS_00000072	j	XLOC_000032	AGAP004718	AGAP004718-RA	TSS52	2L:2686890-2719933	2407	-	Res	Sus	OK	1.54751	0.809647	2.28538	0.200423	0	0.416183	-2.04397	3.47204	0.000516511	0.00455891	yes
TCONS_00000088	TCONS_00000088	j	XLOC_000041	AGAP004737	AGAP004737-RA	TSS69	2L:2965653-2974662	1855	-	Res	Sus	OK	18.1453	12.282	24.0086	8.53852	5.59915	11.4779	-0.753824	3.19319	0.00140709	0.0102586	yes
TCONS_00000116	TCONS_00000116	j	XLOC_000059	AGAP004766	AGAP004766-RA	TSS92	2L:3163009-3180396	1307	-	Res	Sus	OK	10.5315	6.72084	14.3421	4.60256	2.65521	6.54991	-0.827755	2.97368	0.0029425	0.0181456	yes
TCONS_00000130	TCONS_00000130	j	XLOC_000068	AGAP004774	AGAP004774-RA	TSS97	2L:3388692-3400499	8298	-	Res	Sus	OK	0.443646	0.236447	0.650845	0.112359	0.028522	0.196195	-1.37333	3.12027	0.00180686	0.0124783	yes
TCONS_00000140	TCONS_00000140	j	XLOC_000074	AGAP004785	AGAP004785-RA	TSS104	2L:3541814-3544848	930	-	Res	Sus	OK	5.60219	3.15331	8.05108	1.47661	0.510025	2.44319	-1.33341	3.38802	0.000703979	0.00586511	yes
TCONS_00000160	TCONS_00000160	j	XLOC_000080	AGAP004801	AGAP004801-RB	TSS116	2L:3733800-3744679	2007	-	Res	Sus	OK	0.740202	0.264211	1.21619	2.35875	1.35378	3.36372	1.15896	-3.00486	0.00265707	0.0167627	yes
TCONS_00000165	TCONS_00000165	j	XLOC_000083	AGAP004805	AGAP004805-RB	TSS121	2L:3757338-3778565	4167	-	Res	Sus	OK	1.8281	1.11588	2.54032	0	0	0	-1.79769e+308	-1.79769e+308	1.42186e-07	4.06325e-06	yes
TCONS_00000183	TCONS_00000183	j	XLOC_000091	AGAP004827	AGAP004827-RA	TSS131	2L:4103814-4144864	7013	-	Res	Sus	OK	2.81036	1.86299	3.75774	1.05833	0.649657	1.46701	-0.976617	3.81052	0.000138677	0.00155537	yes
TCONS_00000190	TCONS_00000190	j	XLOC_000094	AGAP004833	AGAP004833-RA	TSS137	2L:4233341-4239922	2578	-	Res	Sus	OK	2.62087	1.56215	3.67958	0	0	0	-1.79769e+308	-1.79769e+308	3.69091e-07	9.37021e-06	yes
TCONS_00000195	TCONS_00000195	j	XLOC_000097	AGAP004835	AGAP004835-RA	TSS141	2L:4302258-4323929	3673	-	Res	Sus	OK	2.7265	1.70673	3.74627	0.665293	0.317016	1.01357	-1.41055	4.3848	1.16093e-05	0.000190848	yes
TCONS_00000216	TCONS_00000216	j	XLOC_000108	AGAP004856	AGAP004856-RA	TSS160	2L:4495013-4496644	1057	-	Res	Sus	OK	1.61597	0.567582	2.66436	0.121739	0	0.337648	-2.58582	2.73851	0.00617181	0.0310689	yes
TCONS_00000219	TCONS_00000219	j	XLOC_000111	AGAP004863	AGAP004863-RA	TSS163	2L:4568075-4578933	2514	-	Res	Sus	OK	0.846472	0.375201	1.31774	0	0	0	-1.79769e+308	-1.79769e+308	0.000163891	0.00178817	yes
TCONS_00000223	TCONS_00000223	j	XLOC_000113	AGAP004870	AGAP004870-RA	TSS169	2L:4692582-4697890	4302	-	Res	Sus	OK	0.580561	0.273746	0.887376	0.154245	0.0169174	0.291573	-1.32545	2.56038	0.0104558	0.0447644	yes
TCONS_00000226	TCONS_00000226	j	XLOC_000114	BND7A_ANOGA	AGAP004871-RA	TSS172	2L:4736659-4760812	5357	-	Res	Sus	OK	4.88558	3.29946	6.4717	1.52054	0.959475	2.0816	-1.16722	4.74982	2.03599e-06	4.22947e-05	yes
TCONS_00000245	TCONS_00000245	j	XLOC_000125	AGAP004892	AGAP004892-RA	TSS193	2L:5003000-5042392	11203	-	Res	Sus	OK	3.53088	2.40188	4.65987	0.344377	0.186706	0.502048	-2.32756	8.33588	0	0	yes
TCONS_00000251	TCONS_00000251	j	XLOC_000130	AGAP004902	AGAP004902-RC	TSS202	2L:5671273-5765480	6782	-	Res	Sus	OK	1.59492	1.01025	2.1796	0.745963	0.430289	1.06164	-0.759905	2.71454	0.00663672	0.0325152	yes
TCONS_00000252	TCONS_00000252	j	XLOC_000130	AGAP004902	AGAP004902-RC	TSS202	2L:5671273-5765480	6782	-	Res	Sus	OK	2.02645	1.31202	2.74088	0.0449181	0	0.103372	-3.8092	5.65055	1.59938e-08	5.94518e-07	yes
TCONS_00000253	TCONS_00000253	j	XLOC_000130	AGAP004902	AGAP004902-RC	TSS202	2L:5671273-5765480	7313	-	Res	Sus	OK	3.1676	2.11478	4.22042	1.64813	1.06221	2.23405	-0.653333	2.68486	0.007256	0.0347317	yes
TCONS_00000269	TCONS_00000269	j	XLOC_000139	AGAP004915	AGAP004915-RA	TSS213	2L:5918817-5943382	3121	-	Res	Sus	OK	1.62175	0.912159	2.33135	0.16811	0	0.339354	-2.26664	4.08905	4.33147e-05	0.000591511	yes
TCONS_00000270	TCONS_00000270	j	XLOC_000139	AGAP004915	AGAP004915-RA	TSS213	2L:5918817-5943382	3301	-	Res	Sus	OK	4.5491	2.9697	6.1285	1.89253	1.13639	2.64868	-0.877014	3.31377	0.000920483	0.00730739	yes
TCONS_00000271	TCONS_00000271	j	XLOC_000139	AGAP004915	AGAP004915-RA	TSS215	2L:5918817-5943382	2862	-	Res	Sus	OK	1.3094	0.686575	1.93222	0.205786	0.00762891	0.403943	-1.85049	3.44597	0.000569023	0.00492584	yes
TCONS_00000272	TCONS_00000272	j	XLOC_000139	AGAP004915	AGAP004915-RA	TSS214	2L:5918817-5943382	3193	-	Res	Sus	OK	0.763035	0.350037	1.17603	2.03481	1.23066	2.83896	0.980854	-2.92714	0.00342091	0.0202796	yes
TCONS_00000284	TCONS_00000284	j	XLOC_000146	AGAP004932	AGAP004932-RA	TSS225	2L:6151635-6188676	1950	-	Res	Sus	OK	1.04012	0.420731	1.65951	0.14719	0	0.351743	-1.95537	2.58658	0.00969342	0.0424603	yes
TCONS_00000292	TCONS_00000292	j	XLOC_000149	AGAP004940	AGAP004940-RA	TSS232	2L:6228870-6262851	1140	-	Res	Sus	OK	4.2861	2.44868	6.12351	1.6131	0.731315	2.49489	-0.977218	2.8134	0.00490207	0.0263837	yes
TCONS_00000305	TCONS_00000305	j	XLOC_000155	AGAP004950	AGAP004950-RA	TSS243	2L:6715703-7007174	14373	-	Res	Sus	OK	4.05385	2.78575	5.32194	0.166471	0.0806543	0.252287	-3.1926	10.5892	0	0	yes
TCONS_00000306	TCONS_00000306	j	XLOC_000155	AGAP004950	AGAP004950-RA	TSS244	2L:6715703-7007174	15216	-	Res	Sus	OK	2.10691	1.42874	2.78507	0.803176	0.522357	1.08399	-0.964403	4.05863	4.93621e-05	0.000661806	yes
TCONS_00000310	TCONS_00000310	j	XLOC_000155	AGAP004950	AGAP004950-RA	TSS248	2L:6715703-7007174	14145	-	Res	Sus	OK	1.06155	0.694422	1.42868	0.179401	0.088571	0.270231	-1.77786	5.79919	6.66346e-09	2.70979e-07	yes
TCONS_00000319	TCONS_00000319	j	XLOC_000161	AGAP004963	AGAP004963-RA	TSS256	2L:7219032-7221573	2010	-	Res	Sus	OK	10.8292	7.25041	14.408	3.68715	2.28459	5.08971	-1.07739	4.27624	1.90075e-05	0.000291102	yes
TCONS_00000328	TCONS_00000328	j	XLOC_000166	AGAP004970	AGAP004970-RA	TSS264	2L:7321500-7340658	3855	-	Res	Sus	OK	5.61876	3.76431	7.47321	0.246556	0.0682036	0.424909	-3.12628	7.86374	3.77476e-15	5.51502e-13	yes
TCONS_00000347	TCONS_00000347	j	XLOC_000182	AGAP005006	AGAP005006-RA	TSS284	2L:7807762-7812066	3229	-	Res	Sus	OK	0.923297	0.491335	1.35526	0.0660242	0	0.154011	-2.63793	3.73545	0.000187377	0.00199508	yes
TCONS_00000349	TCONS_00000349	j	XLOC_000183	AGAP005009	AGAP005009-RA	TSS285	2L:7820592-7917012	1034	-	Res	Sus	OK	3.42835	1.79195	5.06475	10.337	6.63249	14.0416	1.10365	-3.69809	0.000217227	0.00226161	yes
TCONS_00000380	TCONS_00000380	j	XLOC_000204	ITP	AGAP005055-RA	TSS308	2L:8849202-8887660	4535	-	Res	Sus	OK	11.3972	7.83542	14.959	5.92948	4.02513	7.83384	-0.653433	2.91631	0.003542	0.0208212	yes
TCONS_00000381	TCONS_00000381	j	XLOC_000204	ITP	AGAP005055-RA	TSS309	2L:8849202-8887660	3640	-	Res	Sus	OK	2.72264	1.72744	3.71784	0.335571	0.120327	0.550816	-2.09352	5.67144	1.41601e-08	5.36296e-07	yes
TCONS_00000385	TCONS_00000385	j	XLOC_000205	AGAP005057	AGAP005057-RA	TSS313	2L:8891510-8912235	5040	-	Res	Sus	OK	11.3072	7.76977	14.8446	5.18252	3.50258	6.86246	-0.780145	3.46347	0.000533248	0.0046665	yes
TCONS_00000387	TCONS_00000387	j	XLOC_000205	AGAP005057	AGAP005057-RA	TSS313	2L:8891510-8912235	5579	-	Res	Sus	OK	2.6406	1.73162	3.54958	0.379153	0.180311	0.577995	-1.94082	6.18765	6.10671e-10	3.298e-08	yes
TCONS_00000404	TCONS_00000404	j	XLOC_000214	AGAP005069	AGAP005069-RA	TSS326	2L:9386576-9397767	1960	-	Res	Sus	OK	3.63333	2.18237	5.08428	0	0	0	-1.79769e+308	-1.79769e+308	2.74711e-07	7.23645e-06	yes
TCONS_00000437	TCONS_00000437	j	XLOC_000225	AGAP005082	AGAP005082-RA	TSS345	2L:9760045-9779988	8786	-	Res	Sus	OK	1.6768	1.09593	2.25767	0.335362	0.173126	0.497599	-1.60943	5.40978	6.3103e-08	1.97468e-06	yes
TCONS_00000451	TCONS_00000451	j	XLOC_000229	AGAP005091	AGAP005091-RE	TSS352	2L:9898847-9945458	6388	-	Res	Sus	OK	7.78744	5.34239	10.2325	1.08158	0.665746	1.49741	-1.97409	7.95392	1.77636e-15	2.7405e-13	yes
TCONS_00000452	TCONS_00000452	j	XLOC_000229	AGAP005091	AGAP005091-RE	TSS353	2L:9898847-9945458	5380	-	Res	Sus	OK	1.03893	0.60694	1.47091	4.34526	2.93034	5.76018	1.4309	-5.41873	6.00225e-08	1.8863e-06	yes
TCONS_00000456	TCONS_00000456	j	XLOC_000229	AGAP005091	AGAP005091-RE	TSS356	2L:9898847-9945458	5024	-	Res	Sus	OK	10.4068	7.15597	13.6577	3.67939	2.4609	4.89788	-1.03971	4.56768	4.93156e-06	9.14649e-05	yes
TCONS_00000470	TCONS_00000470	j	XLOC_000235	AGAP005104	AGAP005104-RA	TSS368	2L:10146125-10148400	1400	-	Res	Sus	OK	3.61773	2.12918	5.10628	1.44174	0.700665	2.18281	-0.919998	2.79459	0.00519659	0.0275488	yes
TCONS_00000483	TCONS_00000483	j	XLOC_000240	AGAP013744	AGAP013744-RA	TSS380	2L:10207781-10234005	6604	-	Res	Sus	OK	1.00084	0.584306	1.41737	0	0	0	-1.79769e+308	-1.79769e+308	7.71557e-07	1.80986e-05	yes
TCONS_00000487	TCONS_00000487	j	XLOC_000243	AGAP005121	AGAP005121-RA	TSS383	2L:10251722-10252977	966	-	Res	Sus	OK	27.7764	18.6841	36.8688	9.70848	6.08462	13.3323	-1.05119	4.23466	2.28898e-05	0.000340859	yes
TCONS_00000506	TCONS_00000506	j	XLOC_000256	AGAP005153	AGAP005153-RB	TSS398	2L:10600027-10604426	1977	-	Res	Sus	OK	17.1799	11.686	22.6738	49.4768	34.1323	64.8214	1.05776	-4.74892	2.04508e-06	4.24635e-05	yes
TCONS_00000507	TCONS_00000507	j	XLOC_000257	AGAP005155	AGAP005155-RA	TSS400	2L:10608649-10646207	6124	-	Res	Sus	OK	12.5021	8.619	16.3853	1.78424	1.15544	2.41304	-1.94691	8.28904	2.22045e-16	4.24124e-14	yes
TCONS_00000514	TCONS_00000514	j	XLOC_000262	AGAP005163	AGAP005163-RA	TSS406	2L:10898166-10925732	1796	-	Res	Sus	OK	2.27068	1.21068	3.33068	0.374038	0.0220713	0.726005	-1.80347	3.43381	0.000595165	0.00510804	yes
TCONS_00000538	TCONS_00000538	j	XLOC_000274	AGAP005187	AGAP005187-RA	TSS426	2L:12119829-12138428	11911	-	Res	Sus	OK	0.842054	0.528823	1.15529	0	0	0	-1.79769e+308	-1.79769e+308	3.79584e-08	1.26117e-06	yes
TCONS_00000553	TCONS_00000553	j	XLOC_000281	OBP20	AGAP005208-RA	TSS434	2L:12236126-12316815	1023	-	Res	Sus	OK	9.78357	6.25784	13.3093	1.59082	0.702012	2.47963	-1.81645	5.46424	4.64883e-08	1.50935e-06	yes
TCONS_00000556	TCONS_00000556	j	XLOC_000284	AGAP005216	AGAP005216-RA	TSS437	2L:12409310-12418295	6591	-	Res	Sus	OK	1.0175	0.610965	1.42404	0	0	0	-1.79769e+308	-1.79769e+308	2.78284e-07	7.30876e-06	yes
TCONS_00000557	TCONS_00000557	j	XLOC_000284	AGAP005216	AGAP005216-RA	TSS437	2L:12409310-12418295	6283	-	Res	Sus	OK	3.63421	2.43903	4.82939	0.0700565	0	0.144875	-3.94885	7.06754	1.57696e-12	1.48359e-10	yes
TCONS_00000558	TCONS_00000558	j	XLOC_000284	AGAP005216	AGAP005216-RA	TSS437	2L:12409310-12418295	6591	-	Res	Sus	OK	3.72318	2.5039	4.94245	0.0716171	0	0.145926	-3.951	7.26257	3.79918e-13	3.95357e-11	yes
TCONS_00000560	TCONS_00000560	j	XLOC_000285	AGAP005219	AGAP005219-RA	TSS440	2L:12441286-12493379	2628	-	Res	Sus	OK	0.922808	0.426926	1.41869	0	0	0	-1.79769e+308	-1.79769e+308	9.88704e-05	0.00116706	yes
TCONS_00000561	TCONS_00000561	j	XLOC_000285	AGAP005219	AGAP005219-RA	TSS440	2L:12441286-12493379	4045	-	Res	Sus	OK	0.881973	0.456451	1.30749	0.215396	0.0398503	0.390942	-1.40968	2.97687	0.00291212	0.0179935	yes
TCONS_00000567	TCONS_00000567	j	XLOC_000286	AGAP005221	AGAP005221-RA	TSS446	2L:12501100-12503861	2639	-	Res	Sus	OK	1.36095	0.759184	1.96273	0.370817	0.129455	0.612179	-1.30023	3.3048	0.00095045	0.00748736	yes
TCONS_00000569	TCONS_00000569	j	XLOC_000287	AGAP005222	AGAP005222-RB	TSS448	2L:12504544-12517889	3900	-	Res	Sus	OK	1.239	0.701526	1.77648	4.23751	2.82401	5.65101	1.22967	-4.49424	6.98194e-06	0.000123473	yes
TCONS_00000570	TCONS_00000570	j	XLOC_000287	AGAP005222	AGAP005222-RB	TSS449	2L:12504544-12517889	3903	-	Res	Sus	OK	5.5046	3.68173	7.32746	0.999064	0.556794	1.44134	-1.70652	6.17364	6.67352e-10	3.58219e-08	yes
TCONS_00000572	TCONS_00000572	j	XLOC_000287	AGAP005222	AGAP005222-RB	TSS451	2L:12504544-12517889	3569	-	Res	Sus	OK	7.9992	5.41445	10.5839	1.51041	0.898445	2.12238	-1.66696	6.43319	1.24953e-10	7.88739e-09	yes
TCONS_00000590	TCONS_00000590	j	XLOC_000295	AGAP005245	AGAP005245-RC	TSS463	2L:12875391-12986025	6176	-	Res	Sus	OK	6.13946	4.18017	8.09876	3.21357	2.15223	4.27491	-0.647356	2.81911	0.00481573	0.0260174	yes
TCONS_00000598	TCONS_00000598	j	XLOC_000295	AGAP005245	AGAP005245-RC	TSS463	2L:12875391-12986025	7793	-	Res	Sus	OK	7.03463	4.84002	9.22925	2.51548	1.69172	3.33924	-1.02838	4.54742	5.4307e-06	9.94269e-05	yes
TCONS_00000626	TCONS_00000626	j	XLOC_000302	AGAP005258	AGAP005258-RA	TSS478	2L:13257558-13338740	10376	-	Res	Sus	OK	0.474305	0.263633	0.684978	2.23244	1.50123	2.96365	1.549	-5.61356	1.98209e-08	7.16264e-07	yes
TCONS_00000627	TCONS_00000627	j	XLOC_000302	AGAP005258	AGAP005258-RA	TSS480	2L:13257558-13338740	9778	-	Res	Sus	OK	10.3567	7.15124	13.5622	3.13322	2.12719	4.13924	-1.19557	5.36168	8.24521e-08	2.49693e-06	yes
TCONS_00000628	TCONS_00000628	j	XLOC_000304	AGAP005261	AGAP005261-RA	TSS482	2L:13357733-13362504	1478	-	Res	Sus	OK	7.12125	4.53712	9.70538	2.52692	1.38047	3.67337	-1.03608	3.56678	0.000361388	0.00342841	yes
TCONS_00000641	TCONS_00000641	j	XLOC_000311	AGAP005275	AGAP005275-RA	TSS493	2L:13532518-13544722	5537	-	Res	Sus	OK	0.171418	0.0470207	0.295815	2.72142	1.81772	3.62512	2.76481	-6.92879	4.24438e-12	3.66487e-10	yes
TCONS_00000642	TCONS_00000642	j	XLOC_000311	AGAP005275	AGAP005275-RA	TSS494	2L:13532518-13544722	1945	-	Res	Sus	OK	6.51423	4.25215	8.7763	1.92913	1.08169	2.77656	-1.21692	4.34647	1.38344e-05	0.000221487	yes
TCONS_00000643	TCONS_00000643	j	XLOC_000311	AGAP005275	AGAP005275-RA	TSS494	2L:13532518-13544722	5368	-	Res	Sus	OK	5.17888	3.51846	6.8393	2.49544	1.66136	3.32952	-0.730123	3.15284	0.00161693	0.0114774	yes
TCONS_00000644	TCONS_00000644	j	XLOC_000311	AGAP005275	AGAP005275-RA	TSS495	2L:13532518-13544722	4410	-	Res	Sus	OK	2.35214	1.52408	3.18019	0.607569	0.327426	0.887711	-1.35361	4.66669	3.06096e-06	6.07279e-05	yes
TCONS_00000650	TCONS_00000650	j	XLOC_000314	AGAP005282	AGAP005282-RA	TSS501	2L:13620350-13622456	1733	-	Res	Sus	OK	2.19544	1.17413	3.21675	0.27278	0	0.563523	-2.08547	3.58652	0.000335117	0.00321863	yes
TCONS_00000654	TCONS_00000654	j	XLOC_000316	AGAP005285	AGAP005285-RA	TSS504	2L:13628386-13662478	16344	-	Res	Sus	OK	1.48757	1.00044	1.97471	0.29304	0.169265	0.416816	-1.62459	6.07941	1.20629e-09	6.07592e-08	yes
TCONS_00000657	TCONS_00000657	j	XLOC_000317	AGAP005288	AGAP005288-RC	TSS508	2L:13687827-13715687	13447	-	Res	Sus	OK	2.15095	1.45661	2.84528	0.907698	0.592767	1.22263	-0.862752	3.64107	0.000271506	0.00271033	yes
TCONS_00000659	TCONS_00000659	j	XLOC_000317	AGAP005288	AGAP005288-RC	TSS510	2L:13687827-13715687	2456	-	Res	Sus	OK	0.45229	0.126358	0.778223	0	0	0	-1.79769e+308	-1.79769e+308	0.00275702	0.0172575	yes
TCONS_00000664	TCONS_00000664	j	XLOC_000319	AGAP005291	AGAP005291-RB	TSS513	2L:13737167-13748465	8236	-	Res	Sus	OK	1.06687	0.662731	1.47101	0.362547	0.187292	0.537801	-1.07933	3.51493	0.000439878	0.00402003	yes
TCONS_00000666	TCONS_00000666	j	XLOC_000319	AGAP005291	AGAP005291-RB	TSS514	2L:13737167-13748465	9645	-	Res	Sus	OK	6.50882	4.47327	8.54437	2.31302	1.5575	3.06854	-1.0346	4.57573	4.74553e-06	8.84609e-05	yes
TCONS_00000725	TCONS_00000725	j	XLOC_000357	AGAP005325	AGAP005325-RA	TSS547	2L:14101646-14108886	1169	-	Res	Sus	OK	2.53684	1.28948	3.7842	0.159772	0	0.400868	-2.76492	3.48429	0.000493447	0.00440291	yes
TCONS_00000749	TCONS_00000749	j	XLOC_000371	AGAP005355	AGAP005355-RA	TSS566	2L:14483333-14544732	2169	-	Res	Sus	OK	5.24965	3.36827	7.13104	1.41733	0.739114	2.09555	-1.30939	4.38037	1.18477e-05	0.000194189	yes
TCONS_00000755	TCONS_00000755	j	XLOC_000374	AGAP005359	AGAP005359-RA	TSS573	2L:14613280-14645254	8544	-	Res	Sus	OK	2.97384	2.00149	3.94618	0.37942	0.198986	0.559854	-2.05896	7.13542	9.65006e-13	9.44101e-11	yes
TCONS_00000759	TCONS_00000759	j	XLOC_000375	AGAP005360	AGAP005360-RB	TSS576	2L:14645608-14647433	1447	-	Res	Sus	OK	5.67566	3.37127	7.98005	0.360349	0	0.773377	-2.75687	4.53441	5.7764e-06	0.000104713	yes
TCONS_00000765	TCONS_00000765	j	XLOC_000380	AGAP005374	AGAP005374-RA	TSS580	2L:14718903-14724339	3977	-	Res	Sus	OK	1.86712	1.1718	2.56245	0.861959	0.490365	1.23355	-0.772947	2.71362	0.00665533	0.0325774	yes
TCONS_00000784	TCONS_00000784	j	XLOC_000391	AGAP005400	AGAP005400-RB	TSS594	2L:14977800-15076137	2855	-	Res	Sus	OK	5.36854	3.52354	7.21353	1.13829	0.605746	1.67084	-1.55103	5.34371	9.10646e-08	2.72041e-06	yes
TCONS_00000824	TCONS_00000824	j	XLOC_000424	GPRDIH1	AGAP005464-RA	TSS630	2L:15839560-15857158	2996	-	Res	Sus	OK	0.556005	0.227745	0.884265	1.66789	0.988483	2.34729	1.09854	-3.06306	0.00219085	0.0144928	yes
TCONS_00000834	TCONS_00000834	j	XLOC_000426	AGAP005467	AGAP005467-RB	TSS637	2L:15963547-15980283	7152	-	Res	Sus	OK	11.4264	7.90241	14.9504	0.295471	0.150051	0.440891	-3.65511	12.5863	0	0	yes
TCONS_00000837	TCONS_00000837	j	XLOC_000428	AGAP005471	AGAP005471-RA	TSS639	2L:16000528-16067300	11514	-	Res	Sus	OK	2.4926	1.68163	3.30357	7.49197	5.16919	9.81475	1.10051	-4.89749	9.70685e-07	2.20544e-05	yes
TCONS_00000838	TCONS_00000838	j	XLOC_000428	AGAP005471	AGAP005471-RA	TSS639	2L:16000528-16067300	16141	-	Res	Sus	OK	0.685614	0.437697	0.933532	0.273227	0.155163	0.391292	-0.920011	3.26565	0.00109213	0.00837328	yes
TCONS_00000842	TCONS_00000842	j	XLOC_000428	AGAP005471	AGAP005471-RA	TSS642	2L:16000528-16067300	8788	-	Res	Sus	OK	7.85079	5.41291	10.2887	3.88279	2.64522	5.12036	-0.704061	3.16438	0.00155413	0.0111121	yes
TCONS_00000869	TCONS_00000869	j	XLOC_000443	AGAP005507	AGAP005507-RC	TSS663	2L:16359841-16382143	3533	-	Res	Sus	OK	1.50936	0.889701	2.12901	12.1556	8.35815	15.9531	2.08611	-8.08742	6.66134e-16	1.11333e-13	yes
TCONS_00000874	TCONS_00000874	j	XLOC_000443	AGAP005507	AGAP005507-RA	TSS665	2L:16359841-16382143	1651	-	Res	Sus	OK	1.49609	0.753528	2.23865	0.341698	0.0444196	0.638977	-1.47668	2.94857	0.00319248	0.019225	yes
TCONS_00000913	TCONS_00000913	j	XLOC_000463	AGAP005545	AGAP005545-RA	TSS692	2L:16882693-16888175	4742	-	Res	Sus	OK	4.19422	2.79445	5.59399	1.7495	1.09601	2.403	-0.874375	3.49116	0.000480925	0.00430948	yes
TCONS_00000921	TCONS_00000921	j	XLOC_000467	AGAP005549	AGAP005549-RA	TSS695	2L:16957542-16966306	4380	-	Res	Sus	OK	6.10841	4.11277	8.10404	0.706419	0.364022	1.04882	-2.15721	7.38115	1.56986e-13	1.74475e-11	yes
TCONS_00000931	TCONS_00000931	j	XLOC_000471	AGAP005557	AGAP005557-RA	TSS702	2L:17024923-17030271	2385	-	Res	Sus	OK	2.36734	1.36804	3.36665	0.139663	0	0.315319	-2.83029	4.26679	1.98308e-05	0.000301931	yes
TCONS_00000944	TCONS_00000944	j	XLOC_000476	AGAP005567	AGAP005567-RB	TSS709	2L:17309026-17317709	4775	-	Res	Sus	OK	2.58858	1.67007	3.5071	0	0	0	-1.79769e+308	-1.79769e+308	8.67973e-09	3.46584e-07	yes
TCONS_00000965	TCONS_00000965	j	XLOC_000486	AGAP005595	AGAP005595-RA	TSS722	2L:17569808-17609749	517	-	Res	Sus	OK	10.4137	6.27855	14.5489	4.73132	2.47037	6.99228	-0.788918	2.53949	0.0111013	0.0462055	yes
TCONS_00000983	TCONS_00000983	j	XLOC_000493	AGAP005606	AGAP005606-RA	TSS731	2L:17805980-17830388	4204	-	Res	Sus	OK	2.71478	1.74636	3.6832	0.99419	0.564373	1.42401	-1.00454	3.58445	0.000337786	0.00323932	yes
TCONS_00000988	TCONS_00000988	j	XLOC_000494	AGAP005609	AGAP005609-RB	TSS734	2L:17833845-17837159	2225	-	Res	Sus	OK	1.69965	0.918562	2.48073	0.264673	0.0175054	0.51184	-1.85968	3.57352	0.00035221	0.00335577	yes
TCONS_00000991	TCONS_00000991	j	XLOC_000495	AGAP005610	AGAP005610-RA	TSS736	2L:17839132-17841524	983	-	Res	Sus	OK	2.70318	1.31498	4.09139	8.18459	5.12915	11.24	1.10782	-3.48977	0.00048343	0.00432928	yes
TCONS_00001000	TCONS_00001000	j	XLOC_000500	AGAP005617	AGAP005617-RA	TSS743	2L:17879118-17921059	9742	-	Res	Sus	OK	2.95009	1.99944	3.90074	1.5347	1.01764	2.05176	-0.6535	2.80345	0.00505588	0.0270008	yes
TCONS_00001002	TCONS_00001002	j	XLOC_000501	AGAP005619	AGAP005619-RA	TSS746	2L:17921833-17932723	2828	-	Res	Sus	OK	1.69543	0.945558	2.4453	0	0	0	-1.79769e+308	-1.79769e+308	3.0641e-06	6.07627e-05	yes
TCONS_00001003	TCONS_00001003	j	XLOC_000501	AGAP005619	AGAP005619-RA	TSS746	2L:17921833-17932723	2816	-	Res	Sus	OK	1.50172	0.812558	2.19088	0	0	0	-1.79769e+308	-1.79769e+308	6.55938e-06	0.000117174	yes
TCONS_00001032	TCONS_00001032	j	XLOC_000519	AGAP005652	AGAP005652-RA	TSS772	2L:18293873-18302919	4904	-	Res	Sus	OK	49.5801	33.9837	65.1765	20.549	14.1716	26.9264	-0.880778	3.98636	6.70949e-05	0.000852413	yes
TCONS_00001065	TCONS_00001065	j	XLOC_000545	AGAP005710	AGAP005710-RA	TSS792	2L:19213767-19258406	4194	-	Res	Sus	OK	1.36122	0.785178	1.93727	0.365013	0.140056	0.58997	-1.31621	3.52115	0.000429679	0.00394727	yes
TCONS_00001071	TCONS_00001071	j	XLOC_000546	AGAP005711	AGAP005711-RA	TSS794	2L:19260915-19276332	4726	-	Res	Sus	OK	5.3628	3.60641	7.11919	0.643489	0.335371	0.951607	-2.12034	7.31001	2.6712e-13	2.86767e-11	yes
TCONS_00001076	TCONS_00001076	j	XLOC_000548	AGAP005713	AGAP005713-RA	TSS797	2L:19371268-19396793	3629	-	Res	Sus	OK	3.69093	2.40633	4.97553	0.15546	0.00839089	0.302529	-3.16725	6.28412	3.29721e-10	1.91173e-08	yes
TCONS_00001077	TCONS_00001077	j	XLOC_000548	AGAP005713	AGAP005713-RA	TSS797	2L:19371268-19396793	3660	-	Res	Sus	OK	3.64863	2.37852	4.91875	7.26898	4.93051	9.60744	0.689262	-2.90831	0.00363391	0.0212032	yes
TCONS_00001082	TCONS_00001082	j	XLOC_000550	SCRB12	AGAP005716-RA	TSS803	2L:19542879-19567665	2580	-	Res	Sus	OK	8.49692	5.67985	11.314	0.513511	0.187312	0.83971	-2.80619	7.83253	4.88498e-15	7.06689e-13	yes
TCONS_00001085	TCONS_00001085	j	XLOC_000551	AGAP005719	AGAP005719-RA	TSS806	2L:19575582-19594680	5507	-	Res	Sus	OK	3.74142	2.50492	4.97792	0.20666	0.0716496	0.34167	-2.89615	7.91152	2.44249e-15	3.69075e-13	yes
TCONS_00001087	TCONS_00001087	j	XLOC_000551	AGAP005719	AGAP005719-RA	TSS808	2L:19575582-19594680	4433	-	Res	Sus	OK	2.11825	1.34667	2.88983	0.154356	0.0274612	0.281251	-2.61908	5.82552	5.69351e-09	2.36326e-07	yes
TCONS_00001107	TCONS_00001107	j	XLOC_000561	AGAP005739	AGAP005739-RA	TSS823	2L:20039594-20065119	8741	-	Res	Sus	OK	2.85773	1.92174	3.79372	0.151634	0.053728	0.24954	-2.93631	8.11142	4.44089e-16	7.93302e-14	yes
TCONS_00001116	TCONS_00001116	j	XLOC_000564	AGAP005747	AGAP005747-RB	TSS829	2L:20182639-20189559	2889	-	Res	Sus	OK	0.774631	0.354899	1.19436	0.144314	0	0.303235	-1.6804	2.73834	0.00617496	0.0310812	yes
TCONS_00001119	TCONS_00001119	j	XLOC_000565	AGAP005748	AGAP005748-RA	TSS830	2L:20190896-20196458	5141	-	Res	Sus	OK	5.49153	3.7104	7.27266	3.02887	2.0028	4.05494	-0.595017	2.5374	0.0111678	0.0464165	yes
TCONS_00001133	TCONS_00001133	j	XLOC_000573	AGAP005770	AGAP005770-RA	TSS844	2L:20396003-20406030	2113	-	Res	Sus	OK	1.36272	0.658665	2.06677	0.167498	0	0.376991	-2.09627	3.09817	0.00194721	0.0132078	yes
TCONS_00001144	TCONS_00001144	j	XLOC_000578	AGAP005780	AGAP005780-RA	TSS856	2L:20528212-20550676	3818	-	Res	Sus	OK	3.38195	2.21504	4.54885	7.48104	5.09889	9.8632	0.793921	-3.38186	0.000719961	0.00596225	yes
TCONS_00001164	TCONS_00001164	j	XLOC_000586	AGAP005807	AGAP005807-RD	TSS870	2L:21508729-21610766	1833	-	Res	Sus	OK	0.625273	0.174535	1.07601	0	0	0	-1.79769e+308	-1.79769e+308	0.00276481	0.017294	yes
TCONS_00001178	TCONS_00001178	j	XLOC_000591	AGAP005816	AGAP005816-RB	TSS880	2L:21748990-21830055	4632	-	Res	Sus	OK	1.73965	1.06705	2.41225	0.54672	0.268712	0.824728	-1.1575	3.62404	0.000290038	0.00286422	yes
TCONS_00001200	TCONS_00001200	j	XLOC_000599	AGAP005832	AGAP005832-RA	TSS890	2L:22284706-22295933	3644	-	Res	Sus	OK	6.7235	4.54375	8.90325	2.81037	1.83175	3.78899	-0.872293	3.66685	0.000245561	0.00249422	yes
TCONS_00001201	TCONS_00001201	j	XLOC_000599	AGAP005832	AGAP005832-RA	TSS890	2L:22284706-22295933	4430	-	Res	Sus	OK	0.597738	0.295968	0.899509	0	0	0	-1.79769e+308	-1.79769e+308	3.72331e-05	0.000518408	yes
TCONS_00001202	TCONS_00001202	j	XLOC_000599	AGAP005832	AGAP005832-RA	TSS890	2L:22284706-22295933	4763	-	Res	Sus	OK	6.49116	4.40774	8.57458	1.82344	1.16064	2.48625	-1.26971	5.23685	1.63339e-07	4.58461e-06	yes
TCONS_00001203	TCONS_00001203	j	XLOC_000599	AGAP005832	AGAP005832-RA	TSS890	2L:22284706-22295933	4703	-	Res	Sus	OK	13.7959	9.51292	18.0789	7.50873	5.13995	9.87751	-0.608306	2.74873	0.00598263	0.0303695	yes
TCONS_00001205	TCONS_00001205	j	XLOC_000599	AGAP005832	AGAP005832-RA	TSS892	2L:22284706-22295933	3236	-	Res	Sus	OK	1.24327	0.683482	1.80305	0	0	0	-1.79769e+308	-1.79769e+308	4.45735e-06	8.41197e-05	yes
TCONS_00001207	TCONS_00001207	j	XLOC_000600	AGAP005841	AGAP005841-RA	TSS894	2L:22376629-22420970	6093	-	Res	Sus	OK	3.10709	2.06515	4.14903	0.757958	0.434416	1.0815	-1.41081	5.19799	2.01452e-07	5.49362e-06	yes
TCONS_00001212	TCONS_00001212	j	XLOC_000600	AGAP005841	AGAP005841-RA	TSS899	2L:22376629-22420970	3554	-	Res	Sus	OK	2.90483	1.85149	3.95817	0.963882	0.523508	1.40426	-1.10316	3.78255	0.000155231	0.00171018	yes
TCONS_00001213	TCONS_00001213	j	XLOC_000600	AGAP005841	AGAP005841-RA	TSS900	2L:22376629-22420970	4158	-	Res	Sus	OK	2.14727	1.3378	2.95674	0.100979	0	0.213829	-3.05704	5.18391	2.17283e-07	5.86731e-06	yes
TCONS_00001228	TCONS_00001228	j	XLOC_000611	AGAP005865	AGAP005865-RA	TSS912	2L:22649438-22674320	9479	-	Res	Sus	OK	5.30598	3.62935	6.9826	14.8284	10.2324	19.4245	1.02771	-4.64374	3.42158e-06	6.6742e-05	yes
TCONS_00001230	TCONS_00001230	j	XLOC_000612	AGAP005869	AGAP005869-RA	TSS915	2L:22677295-22684114	2456	-	Res	Sus	OK	16.6147	11.3471	21.8824	1.68905	0.949949	2.42814	-2.28613	8.46135	0	0	yes
TCONS_00001240	TCONS_00001240	j	XLOC_000619	AGAP005884	AGAP005884-RB	TSS923	2L:23143804-23153459	2433	-	Res	Sus	OK	2.12304	1.19291	3.05317	0.34862	0.058201	0.639038	-1.80662	3.83884	0.000123615	0.0014101	yes
TCONS_00001241	TCONS_00001241	j	XLOC_000620	AGAP005886	AGAP005886-RA	TSS925	2L:23155878-23171706	4899	-	Res	Sus	OK	1.08736	0.623106	1.55162	0	0	0	-1.79769e+308	-1.79769e+308	1.40455e-06	3.05738e-05	yes
TCONS_00001259	TCONS_00001259	j	XLOC_000630	AGAP005901	AGAP005901-RC	TSS942	2L:23456634-23485901	5315	-	Res	Sus	OK	10.0166	6.88634	13.1468	5.72052	3.8972	7.54383	-0.560183	2.50992	0.0120757	0.0491257	yes
TCONS_00001260	TCONS_00001260	j	XLOC_000630	AGAP005901	AGAP005901-RC	TSS942	2L:23456634-23485901	4985	-	Res	Sus	OK	2.74757	1.80352	3.69163	0.92911	0.544184	1.31404	-1.08425	4.02888	5.60436e-05	0.000735081	yes
TCONS_00001271	TCONS_00001271	j	XLOC_000632	AGAP005905	AGAP005905-RA	TSS949	2L:23575001-23604932	8525	-	Res	Sus	OK	1.17526	0.750229	1.6003	0.312191	0.161339	0.463042	-1.32564	4.39277	1.11914e-05	0.000184667	yes
TCONS_00001294	TCONS_00001294	j	XLOC_000647	AGAP005931	AGAP005931-RA	TSS963	2L:23847252-23849640	2021	-	Res	Sus	OK	1.93356	1.0304	2.83671	0.11758	0	0.285401	-2.79999	3.72891	0.000192308	0.00204069	yes
TCONS_00001304	TCONS_00001304	j	XLOC_000652	AGAP005940	AGAP005940-RB	TSS969	2L:23872259-23880641	6601	-	Res	Sus	OK	6.25148	4.28238	8.22058	1.91492	1.26182	2.56802	-1.18314	5.09694	3.45195e-07	8.84498e-06	yes
TCONS_00001316	TCONS_00001316	j	XLOC_000657	AGAP005952	AGAP005952-RA	TSS978	2L:24024063-24034855	3140	-	Res	Sus	OK	13.576	9.21548	17.9365	24.3808	16.7886	31.9729	0.585491	-2.61752	0.00885725	0.0401035	yes
TCONS_00001317	TCONS_00001317	j	XLOC_000657	AGAP005952	AGAP005952-RA	TSS978	2L:24024063-24034855	2933	-	Res	Sus	OK	6.86289	4.51384	9.21195	0.499402	0.151981	0.846822	-2.62047	6.75973	1.38249e-11	1.07773e-09	yes
TCONS_00001332	TCONS_00001332	j	XLOC_000667	AGAP005976	AGAP005976-RA	TSS990	2L:24341920-24406816	6132	-	Res	Sus	OK	1.21402	0.746776	1.68126	2.43505	1.61789	3.2522	0.696031	-2.72617	0.00640733	0.031801	yes
TCONS_00001333	TCONS_00001333	j	XLOC_000667	AGAP005976	AGAP005976-RA	TSS990	2L:24341920-24406816	6192	-	Res	Sus	OK	6.92862	4.74285	9.1144	0.499196	0.267471	0.730921	-2.63042	9.37346	0	0	yes
TCONS_00001344	TCONS_00001344	j	XLOC_000672	AGAP005984	AGAP005984-RB	TSS997	2L:24519830-24526074	2291	-	Res	Sus	OK	27.9506	19.2396	36.6616	52.7896	36.439	69.1402	0.635875	-2.89434	0.00379951	0.0218659	yes
TCONS_00001346	TCONS_00001346	j	XLOC_000672	AGAP005984	AGAP005984-RB	TSS998	2L:24519830-24526074	2187	-	Res	Sus	OK	12.8159	8.63662	16.9952	1.78478	0.967935	2.60163	-1.97139	7.01603	2.28262e-12	2.08522e-10	yes
TCONS_00001348	TCONS_00001348	j	XLOC_000674	AGAP005986	AGAP005986-RA	TSS1000	2L:24529790-24531860	1408	-	Res	Sus	OK	1.48337	0.675711	2.29104	0.123513	0	0.311421	-2.48573	3.07667	0.00209329	0.0139901	yes
TCONS_00001371	TCONS_00001371	j	XLOC_000688	AGAP006027	AGAP006027-RA	TSS1024	2L:25253960-25314873	2252	-	Res	Sus	OK	0.932871	0.405564	1.46018	0	0	0	-1.79769e+308	-1.79769e+308	0.0002014	0.00211934	yes
TCONS_00001372	TCONS_00001372	j	XLOC_000688	AGAP006027	AGAP006027-RA	TSS1024	2L:25253960-25314873	3824	-	Res	Sus	OK	4.19728	2.74887	5.64569	1.74106	1.04842	2.4337	-0.879941	3.34173	0.000832592	0.00673199	yes
TCONS_00001374	TCONS_00001374	j	XLOC_000689	AGAP006028	AGAP006028-RC	TSS1027	2L:25359764-25435023	2079	-	Res	Sus	OK	1.18067	0.58296	1.77839	0.278269	0.0269504	0.529587	-1.44525	2.79179	0.00524166	0.0275593	yes
TCONS_00001378	TCONS_00001378	j	XLOC_000689	AGAP006028	AGAP006028-RC	TSS1029	2L:25359764-25435023	343	-	Res	Sus	OK	7.94883	3.75969	12.138	0.0511935	0	0.211209	-5.04517	3.18325	0.00145632	0.0105409	yes
TCONS_00001469	TCONS_00001469	j	XLOC_000729	AGAP006107	AGAP006107-RC	TSS1085	2L:26694458-26765811	6591	-	Res	Sus	OK	2.16635	1.42071	2.91199	1.06841	0.661359	1.47546	-0.706872	2.75348	0.0058966	0.030033	yes
TCONS_00001472	TCONS_00001472	j	XLOC_000729	AGAP006107	AGAP006107-RC	TSS1088	2L:26694458-26765811	4587	-	Res	Sus	OK	0	0	0	0.358934	0.164071	0.553797	1.79769e+308	1.79769e+308	0.000114817	0.00132447	yes
TCONS_00001474	TCONS_00001474	j	XLOC_000729	AGAP006107	AGAP006107-RC	TSS1089	2L:26694458-26765811	4390	-	Res	Sus	OK	1.72083	1.07405	2.3676	0.570677	0.298205	0.843148	-1.10374	3.63287	0.000280281	0.00277844	yes
TCONS_00001479	TCONS_00001479	j	XLOC_000731	AGAP006113	AGAP006113-RA	TSS1091	2L:26775787-26842831	6076	-	Res	Sus	OK	8.3993	5.75997	11.0386	4.45084	3.01156	5.89012	-0.635055	2.81683	0.00485007	0.0261613	yes
TCONS_00001482	TCONS_00001482	j	XLOC_000731	AGAP006113	AGAP006113-RA	TSS1093	2L:26775787-26842831	5347	-	Res	Sus	OK	6.24606	4.24221	8.24991	12.205	8.41551	15.9946	0.669898	-3.00093	0.00269161	0.0169321	yes
TCONS_00001486	TCONS_00001486	j	XLOC_000733	AGAP006115	AGAP006115-RB	TSS1097	2L:26845367-26888164	4012	-	Res	Sus	OK	9.15781	6.22219	12.0934	3.29031	2.13542	4.44519	-1.02363	4.30684	1.65603e-05	0.000258012	yes
TCONS_00001536	TCONS_00001536	j	XLOC_000758	AGAP006165	AGAP006165-RB	TSS1131	2L:27443821-27474889	14147	-	Res	Sus	OK	5.77237	3.98278	7.56197	2.78294	1.90168	3.66421	-0.729574	3.29256	0.000992804	0.0077628	yes
TCONS_00001548	TCONS_00001548	j	XLOC_000762	AGAP006171	AGAP006171-RA	TSS1140	2L:27646631-27651664	4483	-	Res	Sus	OK	2.8642	1.88203	3.84637	0.116714	0.0104535	0.222975	-3.20031	6.5791	4.7331e-11	3.28363e-09	yes
TCONS_00001569	TCONS_00001569	j	XLOC_000769	G12_ANOGA	AGAP006187-RA	TSS1152	2L:27931385-27932433	887	-	Res	Sus	OK	1.76989	0.671333	2.86845	0.13286	0	0.363262	-2.58938	2.81164	0.004929	0.0264835	yes
TCONS_00001574	TCONS_00001574	j	XLOC_000771	AGAP006205	AGAP006205-RA	TSS1154	2L:28233785-28239170	3587	-	Res	Sus	OK	0.700519	0.340255	1.06078	0	0	0	-1.79769e+308	-1.79769e+308	5.03464e-05	0.000672957	yes
TCONS_00001588	TCONS_00001588	j	XLOC_000778	AGAP006223	AGAP006223-RA	TSS1164	2L:28524226-28528387	1455	-	Res	Sus	OK	2.54294	1.30598	3.7799	0	0	0	-1.79769e+308	-1.79769e+308	1.96462e-05	0.000299429	yes
TCONS_00001590	TCONS_00001590	j	XLOC_000779	AGAP006225	AGAP006225-RA	TSS1166	2L:28528881-28539416	3603	-	Res	Sus	OK	3.28862	2.1019	4.47534	0.735418	0.365763	1.10507	-1.49778	4.8412	1.29055e-06	2.83157e-05	yes
TCONS_00001595	TCONS_00001595	j	XLOC_000781	AGAP006228	AGAP006228-RA	TSS1169	2L:28548413-28550748	1878	-	Res	Sus	OK	2.61235	1.4521	3.77261	0.355742	0.0170684	0.694416	-1.9938	3.79581	0.000147161	0.00163433	yes
TCONS_00001647	TCONS_00001647	j	XLOC_000817	AGAP006340	AGAP006340-RC	TSS1208	2L:29910413-29965172	1939	-	Res	Sus	OK	1.59323	0.81924	2.36723	5.22326	3.35834	7.08819	1.18736	-3.93886	8.18696e-05	0.00100231	yes
TCONS_00001648	TCONS_00001648	j	XLOC_000817	AGAP006340	AGAP006340-RC	TSS1208	2L:29910413-29965172	3731	-	Res	Sus	OK	0.667696	0.319757	1.01563	0	0	0	-1.79769e+308	-1.79769e+308	6.20194e-05	0.000797343	yes
TCONS_00001652	TCONS_00001652	j	XLOC_000817	AGAP006340	AGAP006340-RC	TSS1209	2L:29910413-29965172	8152	-	Res	Sus	OK	3.10172	2.09095	4.11249	0	0	0	-1.79769e+308	-1.79769e+308	4.19534e-10	2.37018e-08	yes
TCONS_00001660	TCONS_00001660	j	XLOC_000822	AGAP006345	AGAP006345-RA	TSS1214	2L:30093225-30098316	1326	-	Res	Sus	OK	1.1082	0.358186	1.85822	0.101164	0	0.276755	-2.39375	2.5698	0.0101757	0.0439102	yes
TCONS_00001695	TCONS_00001695	j	XLOC_000844	AGAP006376	AGAP006376-RB	TSS1238	2L:30688000-30830090	4721	-	Res	Sus	OK	6.16153	4.17913	8.14394	13.3722	9.22808	17.5164	0.774855	-3.46909	0.000522228	0.00459192	yes
TCONS_00001719	TCONS_00001719	j	XLOC_000850	AGAP006384	AGAP006384-RA	TSS1255	2L:31021799-31025790	2252	-	Res	Sus	OK	1.54438	0.806698	2.28206	0.140733	0	0.317301	-2.39551	3.56879	0.00035864	0.00340893	yes
TCONS_00001736	TCONS_00001736	j	XLOC_000859	AGAP006403	AGAP006403-RA	TSS1265	2L:31263707-31293355	5023	-	Res	Sus	OK	1.43243	0.856565	2.0083	0.152937	0.0195556	0.286319	-2.2371	4.65902	3.17717e-06	6.27512e-05	yes
TCONS_00001754	TCONS_00001754	j	XLOC_000871	AGAP006432	AGAP006432-RA	TSS1276	2L:31781293-31797424	986	-	Res	Sus	OK	160.013	110.041	209.985	2.83906	1.37654	4.30157	-4.03178	13.3854	0	0	yes
TCONS_00001759	TCONS_00001759	j	XLOC_000874	AGAP006436	AGAP006436-RA	TSS1279	2L:31825976-31873758	8800	-	Res	Sus	OK	0.363477	0.183224	0.543731	0.082283	0.00975549	0.154811	-1.48555	2.93771	0.0033065	0.0197366	yes
TCONS_00001769	TCONS_00001769	j	XLOC_000881	AGAP006452	AGAP006452-RB	TSS1289	2L:32266594-32298155	6689	-	Res	Sus	OK	13.9286	9.6132	18.244	49.2636	32.9907	65.5365	1.26324	-5.57864	2.42403e-08	8.50878e-07	yes
TCONS_00001772	TCONS_00001772	j	XLOC_000881	AGAP006452	AGAP006452-RB	TSS1289	2L:32266594-32298155	5803	-	Res	Sus	OK	0.429286	0.205764	0.652808	0	0	0	-1.79769e+308	-1.79769e+308	6.12411e-05	0.000789638	yes
TCONS_00001778	TCONS_00001778	j	XLOC_000885	AGAP006460	AGAP006460-RA	TSS1297	2L:32387042-32431005	5480	-	Res	Sus	OK	1.46662	0.887072	2.04616	0	0	0	-1.79769e+308	-1.79769e+308	2.08228e-07	5.65046e-06	yes
TCONS_00001779	TCONS_00001779	j	XLOC_000885	AGAP006460	AGAP006460-RA	TSS1297	2L:32387042-32431005	12100	-	Res	Sus	OK	1.19427	0.783893	1.60464	0.173007	0.0824008	0.263613	-1.93196	6.16864	6.88779e-10	3.6793e-08	yes
TCONS_00001791	TCONS_00001791	j	XLOC_000888	AGAP006463	AGAP006463-RA	TSS1302	2L:32489109-32506238	2614	-	Res	Sus	OK	1.77012	0.942738	2.59751	0.175918	0	0.385784	-2.30879	3.60389	0.000313494	0.00305349	yes
TCONS_00001807	TCONS_00001807	j	XLOC_000897	AGAP006474	AGAP006474-RA	TSS1313	2L:32638195-32675916	2220	-	Res	Sus	OK	3.10158	1.86327	4.33989	0.968576	0.445481	1.49167	-1.16384	3.46577	0.000528708	0.00463596	yes
TCONS_00001818	TCONS_00001818	j	XLOC_000900	AGAP006479	AGAP006479-RA	TSS1323	2L:32830308-32840743	6729	-	Res	Sus	OK	2.96099	1.97936	3.94263	1.32925	0.846184	1.81232	-0.800909	3.25633	0.00112864	0.00859787	yes
TCONS_00001854	TCONS_00001854	j	XLOC_000918	AGAP006535	AGAP006535-RA	TSS1348	2L:33965554-33969577	3578	-	Res	Sus	OK	0.587132	0.262059	0.912204	0.108838	0	0.233163	-1.68539	2.65541	0.00792126	0.0368021	yes
TCONS_00001881	TCONS_00001881	j	XLOC_000938	AGAP006574	AGAP006574-RB	TSS1372	2L:34207127-34220709	4540	-	Res	Sus	OK	2.39302	1.52628	3.25976	0.292525	0.107781	0.47727	-2.10176	5.77374	7.75313e-09	3.10992e-07	yes
TCONS_00001882	TCONS_00001882	j	XLOC_000938	AGAP006574	AGAP006574-RB	TSS1373	2L:34207127-34220709	3646	-	Res	Sus	OK	5.09525	3.38939	6.80111	1.5335	0.914642	2.15235	-1.20076	4.57997	4.65047e-06	8.71677e-05	yes
TCONS_00001895	TCONS_00001895	j	XLOC_000945	AGAP006601	AGAP006601-RB	TSS1382	2L:34641824-34667651	3980	-	Res	Sus	OK	0.578792	0.2795	0.878084	0	0	0	-1.79769e+308	-1.79769e+308	5.49251e-05	0.000724286	yes
TCONS_00001898	TCONS_00001898	j	XLOC_000945	AGAP006601	AGAP006601-RB	TSS1386	2L:34641824-34667651	1342	-	Res	Sus	OK	8.45412	5.43555	11.4727	3.68541	2.14541	5.22541	-0.830272	3.02119	0.00251784	0.0161124	yes
TCONS_00001899	TCONS_00001899	j	XLOC_000945	AGAP006601	AGAP006601-RB	TSS1386	2L:34641824-34667651	1333	-	Res	Sus	OK	4.97369	2.99443	6.95295	1.30895	0.56749	2.0504	-1.33494	3.85674	0.00011491	0.00132519	yes
TCONS_00001905	TCONS_00001905	j	XLOC_000948	AGAP006608	AGAP006608-RB	TSS1390	2L:34693813-34700160	4826	-	Res	Sus	OK	0.416217	0.177078	0.655355	1.03068	0.596788	1.46458	0.906771	-2.54613	0.0108924	0.0456286	yes
TCONS_00001936	TCONS_00001936	j	XLOC_000963	AGAP006636	AGAP006636-RA	TSS1410	2L:35308603-35400884	2349	-	Res	Sus	OK	1.71921	0.932073	2.50635	0.510383	0.164796	0.85597	-1.21446	2.9716	0.00296254	0.0182335	yes
TCONS_00001964	TCONS_00001964	j	XLOC_000973	AGAP006653	AGAP006653-RB	TSS1433	2L:35703424-35711999	917	-	Res	Sus	OK	6.54809	3.86329	9.23288	2.52342	1.21426	3.83258	-0.953558	2.88406	0.00392585	0.0224175	yes
TCONS_00001976	TCONS_00001976	j	XLOC_000979	AGAP006665	AGAP006665-RC	TSS1439	2L:36439822-36514274	3119	-	Res	Sus	OK	2.72602	1.70261	3.74942	0.636789	0.298116	0.975462	-1.45416	4.46747	7.91497e-06	0.000137439	yes
TCONS_00001982	TCONS_00001982	j	XLOC_000981	AGAP006669	AGAP006669-RA	TSS1444	2L:36568465-36631271	12510	-	Res	Sus	OK	0.353995	0.196711	0.51128	1.1141	0.732124	1.49608	1.14652	-4.08584	4.39177e-05	0.000598635	yes
TCONS_00001983	TCONS_00001983	j	XLOC_000981	AGAP006669	AGAP006669-RA	TSS1444	2L:36568465-36631271	12483	-	Res	Sus	OK	2.89226	1.96953	3.81499	1.59757	1.07003	2.12511	-0.593554	2.58542	0.00972602	0.0425271	yes
TCONS_00002048	TCONS_00002048	j	XLOC_001018	AGAP006755	AGAP006755-RA	TSS1484	2L:37874137-37880455	2303	-	Res	Sus	OK	14.2205	9.6927	18.7483	2.06298	1.21704	2.90892	-1.93053	7.43718	1.02807e-13	1.18437e-11	yes
TCONS_00002088	TCONS_00002088	j	XLOC_001041	AGAP006800	AGAP006800-RB	TSS1511	2L:38583207-38661361	4656	-	Res	Sus	OK	1.40118	0.835665	1.9667	0.209412	0.0553758	0.363448	-1.90077	4.53094	5.87211e-06	0.0001061	yes
TCONS_00002104	TCONS_00002104	j	XLOC_001055	AGAP006825	AGAP006825-RA	TSS1524	2L:38965719-39031767	5959	-	Res	Sus	OK	2.82105	1.86501	3.77709	0.208864	0.0729079	0.344821	-2.60318	7.09441	1.29896e-12	1.24056e-10	yes
TCONS_00002157	TCONS_00002157	j	XLOC_001097	AGAP006890	AGAP006890-RA	TSS1564	2L:39376197-39413052	2234	-	Res	Sus	OK	7.83164	5.19557	10.4677	1.53274	0.830014	2.23547	-1.63111	5.73562	9.71589e-09	3.82421e-07	yes
TCONS_00002161	TCONS_00002161	j	XLOC_001098	AGAP006892	AGAP006892-RA	TSS1566	2L:39428785-39484862	5113	-	Res	Sus	OK	5.71749	3.86883	7.56616	12.7429	8.79171	16.694	0.801441	-3.57801	0.000346226	0.00331019	yes
TCONS_00002171	TCONS_00002171	j	XLOC_001106	AGAP006904	AGAP006904-RC	TSS1576	2L:39815883-39838131	3948	-	Res	Sus	OK	9.39084	6.376	12.4057	3.79927	2.49114	5.10739	-0.904926	3.84452	0.000120788	0.00138466	yes
TCONS_00002175	TCONS_00002175	j	XLOC_001106	AGAP006904	AGAP006904-RC	TSS1576	2L:39815883-39838131	3425	-	Res	Sus	OK	8.1576	5.53278	10.7824	3.98185	2.64115	5.32256	-0.717203	3.07993	0.00207048	0.0138628	yes
TCONS_00002176	TCONS_00002176	j	XLOC_001106	AGAP006904	AGAP006904-RC	TSS1576	2L:39815883-39838131	4210	-	Res	Sus	OK	0.721657	0.371411	1.0719	2.05925	1.30924	2.80925	1.04855	-3.456	0.000548249	0.00477599	yes
TCONS_00002177	TCONS_00002177	j	XLOC_001106	AGAP006904	AGAP006904-RC	TSS1576	2L:39815883-39838131	4683	-	Res	Sus	OK	27.5865	19.0423	36.1307	7.76407	5.31255	10.2156	-1.26782	5.73286	9.87488e-09	3.87297e-07	yes
TCONS_00002188	TCONS_00002188	j	XLOC_001116	AGAP006921	AGAP006921-RB	TSS1589	2L:40002078-40030781	3763	-	Res	Sus	OK	4.08624	2.65173	5.52075	16.8683	11.5946	22.1419	1.41781	-6.03208	1.61864e-09	7.84827e-08	yes
TCONS_00002193	TCONS_00002193	j	XLOC_001120	AGAP006933	AGAP006933-RA	TSS1593	2L:40121336-40126297	4329	-	Res	Sus	OK	4.27409	2.85607	5.69211	0.763506	0.422853	1.10416	-1.7224	6.19566	5.8041e-10	3.14999e-08	yes
TCONS_00002211	TCONS_00002211	j	XLOC_001131	AGAP006959	AGAP006959-RA	TSS1606	2L:40255762-40263682	3057	-	Res	Sus	OK	66.6288	45.7195	87.538	4.2844	2.77363	5.79517	-2.74416	11.6268	0	0	yes
TCONS_00002215	TCONS_00002215	j	XLOC_001134	AGAP006962	AGAP006962-RA	TSS1610	2L:40272228-40278923	1676	-	Res	Sus	OK	0.665328	0.181482	1.14917	0	0	0	-1.79769e+308	-1.79769e+308	0.00297825	0.0183072	yes
TCONS_00002236	TCONS_00002236	j	XLOC_001146	AGAP006998	AGAP006998-RA	TSS1627	2L:40542102-40546097	3771	-	Res	Sus	OK	2.17797	1.34222	3.01372	0.925913	0.499665	1.35216	-0.85537	2.85451	0.00431036	0.0240681	yes
TCONS_00002250	TCONS_00002250	j	XLOC_001152	AGAP007010	AGAP007010-RA	TSS1638	2L:40900501-40973291	2890	-	Res	Sus	OK	3.13348	1.95256	4.3144	0.473035	0.171419	0.774652	-1.89073	5.10546	3.29995e-07	8.50987e-06	yes
TCONS_00002253	TCONS_00002253	j	XLOC_001152	AGAP007010	AGAP007010-RA	TSS1639	2L:40900501-40973291	4036	-	Res	Sus	OK	2.84167	1.80272	3.88062	0	0	0	-1.79769e+308	-1.79769e+308	2.24681e-08	7.96914e-07	yes
TCONS_00002256	TCONS_00002256	j	XLOC_001152	AGAP007010	AGAP007010-RA	TSS1642	2L:40900501-40973291	3001	-	Res	Sus	OK	3.37556	2.10645	4.64466	0.475324	0.164188	0.786459	-1.96032	5.19382	2.06023e-07	5.60096e-06	yes
TCONS_00002272	TCONS_00002272	j	XLOC_001164	AGAP007029	AGAP007029-RA	TSS1652	2L:41052341-41054305	1073	-	Res	Sus	OK	2.12561	0.935847	3.31536	0	0	0	-1.79769e+308	-1.79769e+308	0.000176343	0.0018996	yes
TCONS_00002295	TCONS_00002295	j	XLOC_001184	AGAP007086	AGAP007086-RA	TSS1672	2L:42308293-42409102	10156	-	Res	Sus	OK	1.7308	1.14203	2.31956	0.755839	0.466273	1.04541	-0.82851	3.23426	0.00121957	0.00913444	yes
TCONS_00002296	TCONS_00002296	j	XLOC_001184	AGAP007086	AGAP007086-RA	TSS1672	2L:42308293-42409102	9529	-	Res	Sus	OK	0.362037	0.187272	0.536802	0	0	0	-1.79769e+308	-1.79769e+308	1.71302e-05	0.000266046	yes
TCONS_00002306	TCONS_00002306	j	XLOC_001186	AGAP007092	AGAP007092-RA	TSS1679	2L:42465137-42561148	7420	-	Res	Sus	OK	0.586973	0.328672	0.845273	0.205579	0.0854328	0.325726	-1.04915	2.86817	0.00412852	0.0232766	yes
TCONS_00002327	TCONS_00002327	j	XLOC_001198	AGAP007110	AGAP007110-RA	TSS1694	2L:42892440-42944023	3457	-	Res	Sus	OK	3.57665	2.29967	4.85362	1.43111	0.821209	2.041	-0.915978	3.29511	0.000983838	0.00770089	yes
TCONS_00002333	TCONS_00002333	j	XLOC_001200	AGAP007113	AGAP007113-RA	TSS1699	2L:42957921-42966558	4242	-	Res	Sus	OK	0.874854	0.470224	1.27948	6.69847	4.54625	8.85068	2.03558	-7.2291	4.86278e-13	4.96667e-11	yes
TCONS_00002335	TCONS_00002335	j	XLOC_001201	AGAP007115	AGAP007115-RA	TSS1700	2L:43020136-43022054	1406	-	Res	Sus	OK	2.63004	1.39681	3.86326	0.172746	0	0.41526	-2.72293	3.67936	0.000233817	0.00239533	yes
TCONS_00002344	TCONS_00002344	j	XLOC_001210	AGAP007131	AGAP007131-RA	TSS1708	2L:43139077-43144084	3972	-	Res	Sus	OK	6.62875	4.47305	8.78445	2.05779	1.29847	2.81711	-1.16978	4.75666	1.96825e-06	4.11199e-05	yes
TCONS_00002350	TCONS_00002350	j	XLOC_001211	AGAP007133	AGAP007133-RA	TSS1712	2L:43148758-43310013	4389	-	Res	Sus	OK	0.621152	0.295862	0.946442	0.121591	0	0.24692	-1.63091	2.82128	0.00478325	0.0259149	yes
TCONS_00002414	TCONS_00002414	j	XLOC_001251	AGAP007220	AGAP007220-RA	TSS1753	2L:44384807-44398985	1049	-	Res	Sus	OK	8.39484	5.20028	11.5894	2.79339	1.42378	4.163	-1.10036	3.54583	0.000391378	0.00366329	yes
TCONS_00002415	TCONS_00002415	j	XLOC_001251	AGAP007221	AGAP007221-RB	TSS1753	2L:44384807-44398985	4225	-	Res	Sus	OK	1.77493	1.0989	2.45096	0.658711	0.347307	0.970116	-0.991232	3.26552	0.00109262	0.00837408	yes
TCONS_00002416	TCONS_00002416	j	XLOC_001251	AGAP007221	AGAP007221-RB	TSS1753	2L:44384807-44398985	4549	-	Res	Sus	OK	3.31406	2.18736	4.44076	0.94182	0.544294	1.33935	-1.25812	4.6427	3.43883e-06	6.70191e-05	yes
TCONS_00002424	TCONS_00002424	j	XLOC_001255	HPX4	AGAP007237-RB	TSS1755	2L:44467625-44506731	6992	-	Res	Sus	OK	3.9154	2.63972	5.19108	1.12596	0.6989	1.55302	-1.24628	4.98504	6.19487e-07	1.4823e-05	yes
TCONS_00002443	TCONS_00002443	j	XLOC_001264	AGAP007256	AGAP007256-RA	TSS1769	2L:44717878-44752190	7329	-	Res	Sus	OK	3.75439	2.52465	4.98414	0.783995	0.456361	1.11163	-1.56628	5.89967	3.64233e-09	1.59435e-07	yes
TCONS_00002447	TCONS_00002447	j	XLOC_001265	AGAP007259	AGAP007259-RA	TSS1772	2L:44761400-44763383	1029	-	Res	Sus	OK	5.02083	2.90026	7.14141	1.58341	0.670396	2.49642	-1.15402	3.22915	0.0012416	0.00927112	yes
TCONS_00002458	TCONS_00002458	j	XLOC_001274	AGAP007279	AGAP007279-RA	TSS1781	2L:44888445-44985730	5322	-	Res	Sus	OK	3.39911	2.26045	4.53777	1.20081	0.730743	1.67087	-1.04052	4.03911	5.36551e-05	0.000709235	yes
TCONS_00002459	TCONS_00002459	j	XLOC_001274	AGAP007279	AGAP007279-RA	TSS1781	2L:44888445-44985730	4990	-	Res	Sus	OK	0.244109	0.0771131	0.411105	1.74889	1.10947	2.3883	1.96912	-5.07717	3.831e-07	9.69795e-06	yes
TCONS_00002478	TCONS_00002478	j	XLOC_001283	AGAP007310	AGAP007310-RA	TSS1798	2L:45260151-45270241	1659	-	Res	Sus	OK	6.2745	3.97668	8.57232	3.0016	1.73762	4.26558	-0.737348	2.64249	0.00822977	0.03792	yes
TCONS_00002485	TCONS_00002485	j	XLOC_001284	AGAP007316	AGAP007316-RA	TSS1800	2L:45288384-45350974	1799	-	Res	Sus	OK	3.48469	2.02614	4.94323	1.18943	0.526163	1.85269	-1.07491	3.08332	0.00204708	0.0137269	yes
TCONS_00002499	TCONS_00002499	j	XLOC_001288	AGAP007327	AGAP007327-RB	TSS1809	2L:45425505-45591632	5787	-	Res	Sus	OK	2.80894	1.84642	3.77146	0.563021	0.297615	0.828427	-1.60725	5.51579	3.47223e-08	1.16417e-06	yes
TCONS_00002500	TCONS_00002500	j	XLOC_001288	AGAP007327	AGAP007327-RB	TSS1809	2L:45425505-45591632	5916	-	Res	Sus	OK	2.93083	1.93314	3.92851	0.571721	0.304789	0.838654	-1.63439	5.65715	1.53905e-08	5.75976e-07	yes
TCONS_00002509	TCONS_00002509	j	XLOC_001291	AGAP007332	AGAP007332-RA	TSS1813	2L:45600059-45606192	4126	-	Res	Sus	OK	2.75757	1.78068	3.73447	1.16252	0.682046	1.64299	-0.863764	3.17356	0.00150584	0.01083	yes
TCONS_00002519	TCONS_00002519	j	XLOC_001296	AGAP007340	AGAP007340-RA	TSS1824	2L:45811582-45878638	2774	-	Res	Sus	OK	2.71292	1.6553	3.77054	0	0	0	-1.79769e+308	-1.79769e+308	1.44689e-07	4.11878e-06	yes
TCONS_00002522	TCONS_00002522	j	XLOC_001296	AGAP007340	AGAP007340-RA	TSS1827	2L:45811582-45878638	1943	-	Res	Sus	OK	2.49223	1.39589	3.58856	0.380052	0.0477467	0.712358	-1.88062	3.84274	0.000121666	0.00139219	yes
TCONS_00002531	TCONS_00002531	j	XLOC_001298	AGAP007348	AGAP007348-RA	TSS1830	2L:45974934-45991713	651	-	Res	Sus	OK	4.283	2.10728	6.45872	0.966221	0.0729483	1.85949	-1.48902	2.82312	0.00475589	0.0258238	yes
TCONS_00002534	TCONS_00002534	j	XLOC_001298	AGAP007348	AGAP007348-RA	TSS1831	2L:45974934-45991713	2483	-	Res	Sus	OK	2.72079	1.64529	3.79629	0.988356	0.495056	1.48166	-1.01263	3.18096	0.00146786	0.010607	yes
TCONS_00002543	TCONS_00002543	j	XLOC_001304	AGAP007358	AGAP007358-RA	TSS1836	2L:46033659-46039857	1907	-	Res	Sus	OK	3.42361	2.02785	4.81938	0.207409	0	0.451817	-2.80376	4.49709	6.88891e-06	0.000121974	yes
TCONS_00002549	TCONS_00002549	j	XLOC_001308	AGAP007365	AGAP007365-RA	TSS1839	2L:46080977-46087214	2616	-	Res	Sus	OK	5.59126	3.66668	7.51583	0.486826	0.176016	0.797635	-2.44105	6.73097	1.68534e-11	1.29326e-09	yes
TCONS_00002553	TCONS_00002553	j	XLOC_001309	AGAP007367	AGAP007367-RA	TSS1842	2L:46091148-46111263	4450	-	Res	Sus	OK	4.17303	2.77043	5.57564	1.48923	0.909161	2.06931	-1.03038	4.00552	6.18806e-05	0.000796255	yes
TCONS_00002647	TCONS_00002647	j	XLOC_001370	AGAP007472	AGAP007472-RA	TSS1911	2L:46714694-46751135	3342	-	Res	Sus	OK	1.25644	0.681199	1.83168	0	0	0	-1.79769e+308	-1.79769e+308	6.25799e-06	0.000112199	yes
TCONS_00002648	TCONS_00002648	j	XLOC_001370	AGAP007472	AGAP007472-RA	TSS1911	2L:46714694-46751135	4288	-	Res	Sus	OK	2.02515	1.25371	2.79659	0.888442	0.485498	1.29139	-0.82393	2.78219	0.00539939	0.0281838	yes
TCONS_00002679	TCONS_00002679	j	XLOC_001393	AGAP007495	AGAP007495-RA	TSS1930	2L:46917287-46919121	1197	-	Res	Sus	OK	1.74789	0.740362	2.75542	0.095447	0	0.266216	-2.90759	3.09365	0.00197708	0.0133713	yes
TCONS_00002686	TCONS_00002686	j	XLOC_001398	AGAP007503	AGAP007503-RB	TSS1936	2L:46973435-46994721	4589	-	Res	Sus	OK	0.722089	0.38249	1.06169	3.12851	2.07165	4.18538	1.46616	-5.064	4.10556e-07	1.0316e-05	yes
TCONS_00002688	TCONS_00002688	j	XLOC_001398	AGAP007503	AGAP007503-RB	TSS1936	2L:46973435-46994721	9162	-	Res	Sus	OK	0.384098	0.201386	0.566811	0.0468513	0	0.098245	-2.10392	3.51927	0.000432732	0.00396705	yes
TCONS_00002698	TCONS_00002698	j	XLOC_001403	AGAP007512	AGAP007512-RB	TSS1945	2L:47075149-47110063	9494	-	Res	Sus	OK	3.87831	2.64396	5.11267	0.386054	0.212823	0.559284	-2.30718	8.3877	0	0	yes
TCONS_00002702	TCONS_00002702	j	XLOC_001406	AGAP007523	AGAP007523-RB	TSS1948	2L:47144809-47189580	9418	-	Res	Sus	OK	1.24383	0.806815	1.68084	0	0	0	-1.79769e+308	-1.79769e+308	6.26319e-09	2.56831e-07	yes
TCONS_00002713	TCONS_00002713	j	XLOC_001411	AGAP007536	AGAP007536-RA	TSS1960	2L:47270900-47280410	4753	-	Res	Sus	OK	4.39224	2.92969	5.85478	1.68346	1.05095	2.31597	-0.958988	3.82036	0.000133258	0.00150338	yes
TCONS_00002724	TCONS_00002724	j	XLOC_001413	AGAP007537	AGAP007537-RB	TSS1971	2L:47331124-47345360	2910	-	Res	Sus	OK	0.424978	0.14891	0.701047	0	0	0	-1.79769e+308	-1.79769e+308	0.00103922	0.00804163	yes
TCONS_00002748	TCONS_00002748	j	XLOC_001424	AGAP007553	AGAP007553-RA	TSS1992	2L:47542283-47548348	1966	-	Res	Sus	OK	0.874202	0.348117	1.40029	0	0	0	-1.79769e+308	-1.79769e+308	0.000444592	0.00405137	yes
TCONS_00002749	TCONS_00002749	j	XLOC_001424	AGAP007553	AGAP007553-RA	TSS1992	2L:47542283-47548348	2952	-	Res	Sus	OK	23.2709	16.0309	30.5108	10.6229	7.23176	14.0141	-0.784188	3.51843	0.000434111	0.00397639	yes
TCONS_00002762	TCONS_00002762	j	XLOC_001429	AGAP007563	AGAP007563-RC	TSS1998	2L:47577503-47716624	32812	-	Res	Sus	OK	3.03016	2.08825	3.97208	1.30138	0.892741	1.71002	-0.845192	3.82578	0.000130361	0.00147485	yes
TCONS_00002773	TCONS_00002773	j	XLOC_001432	AGAP007567	AGAP007567-RA	TSS2004	2L:47729562-47760061	2600	-	Res	Sus	OK	2.13722	1.22582	3.04861	0.490245	0.16527	0.81522	-1.47236	3.73598	0.000186986	0.00199237	yes
TCONS_00002792	TCONS_00002792	j	XLOC_001442	AGAP007587	AGAP007587-RA	TSS2019	2L:47990048-48053135	554	-	Res	Sus	OK	2.78057	1.16325	4.39789	0.231168	0	0.603008	-2.48727	2.9083	0.00363397	0.0212008	yes
TCONS_00002794	TCONS_00002794	j	XLOC_001442	AGAP007587	AGAP007587-RB	TSS2019	2L:47990048-48053135	3584	-	Res	Sus	OK	3.97171	2.58961	5.3538	1.47135	0.86018	2.08252	-0.993015	3.66507	0.000247267	0.00250809	yes
TCONS_00002803	TCONS_00002803	j	XLOC_001445	AGAP007595	AGAP007595-RA	TSS2030	2L:48094899-48098781	2010	-	Res	Sus	OK	0.802837	0.29976	1.30591	0	0	0	-1.79769e+308	-1.79769e+308	0.000707174	0.00588174	yes
TCONS_00002810	TCONS_00002810	j	XLOC_001450	AGAP007605	AGAP007605-RA	TSS2034	2L:48160891-48173521	9393	-	Res	Sus	OK	5.19242	3.55579	6.82904	0.246779	0.116466	0.377092	-3.04646	9.90766	0	0	yes
TCONS_00002818	TCONS_00002818	j	XLOC_001453	AGAP007608	AGAP007608-RA	TSS2041	2L:48196813-48229127	2552	-	Res	Sus	OK	3.99777	2.54836	5.44718	0.984382	0.496765	1.472	-1.40148	4.56613	4.96808e-06	9.20648e-05	yes
TCONS_00002847	TCONS_00002847	j	XLOC_001465	AGAP007624	AGAP007624-RA	TSS2058	2L:48381911-48385651	3177	-	Res	Sus	OK	7.42797	4.9901	9.86585	3.99577	2.61765	5.37388	-0.620018	2.60458	0.00919859	0.0409142	yes
TCONS_00002851	TCONS_00002851	j	XLOC_001467	AGAP007627	AGAP007627-RA	TSS2062	2L:48390478-48459910	1887	-	Res	Sus	OK	1.47056	0.709019	2.23211	0	0	0	-1.79769e+308	-1.79769e+308	5.62188e-05	0.000736284	yes
TCONS_00002854	TCONS_00002854	j	XLOC_001469	LANB2	AGAP007629-RA	TSS2065	2L:48472393-48483780	5839	-	Res	Sus	OK	3.91674	2.63426	5.19921	0.568532	0.307314	0.82975	-1.92996	6.84144	7.83995e-12	6.45377e-10	yes
TCONS_00002856	TCONS_00002856	j	XLOC_001469	LANB2	AGAP007629-RA	TSS2067	2L:48472393-48483780	4789	-	Res	Sus	OK	3.11403	2.04875	4.17932	0	0	0	-1.79769e+308	-1.79769e+308	2.51178e-09	1.15565e-07	yes
TCONS_00002859	TCONS_00002859	j	XLOC_001470	AGAP007631	AGAP007631-RA	TSS2070	2L:48483964-48489417	3446	-	Res	Sus	OK	4.70705	3.09681	6.31729	1.55279	0.913099	2.19248	-1.10901	4.14211	3.4413e-05	0.000484958	yes
TCONS_00002869	TCONS_00002869	j	XLOC_001474	AGAP007636	AGAP007636-RA	TSS2080	2L:48516411-48537475	1821	-	Res	Sus	OK	4.69507	2.87711	6.51303	11.3498	7.5819	15.1178	0.882692	-3.46126	0.000537649	0.00469756	yes
TCONS_00002905	TCONS_00002905	j	XLOC_001491	AGAP007667	AGAP007667-RA	TSS2107	2L:48878756-48886902	3036	-	Res	Sus	OK	2.83486	1.73793	3.93178	0.209003	0.00915153	0.408854	-2.6074	5.05537	4.2956e-07	1.07203e-05	yes
TCONS_00002911	TCONS_00002911	j	XLOC_001496	AGAP007681	AGAP007681-RA	TSS2114	2L:48956600-49005616	4896	-	Res	Sus	OK	2.18495	1.37355	2.99636	0.581513	0.289146	0.873881	-1.32372	4.23555	2.27992e-05	0.000339739	yes
TCONS_00002918	TCONS_00002918	j	XLOC_001497	AGAP007685	AGAP007685-RA	TSS2119	2L:49034576-49054862	6931	-	Res	Sus	OK	4.26185	2.87419	5.64951	0.618296	0.34363	0.892962	-1.93049	7.01006	2.38232e-12	2.16732e-10	yes
TCONS_00002940	TCONS_00002940	j	XLOC_001509	AGAP007712	AGAP007712-RA	TSS2134	2L:49180250-49190951	4435	-	Res	Sus	OK	0.183801	0.0227748	0.344827	0	0	0	-1.79769e+308	-1.79769e+308	0.011219	0.0465503	yes
TCONS_00002944	TCONS_00002944	j	XLOC_001509	AGAP007712	AGAP007712-RA	TSS2137	2L:49180250-49190951	3192	-	Res	Sus	OK	4.03378	2.59599	5.47156	0.751398	0.35768	1.14512	-1.68052	5.30367	1.13497e-07	3.31864e-06	yes
TCONS_00002960	TCONS_00002960	j	XLOC_001515	AGAP007721	AGAP007721-RB	TSS2149	2L:49267690-49275961	1017	-	Res	Sus	OK	10.2028	6.44994	13.9556	2.63524	1.3149	3.95558	-1.35369	4.35582	1.3257e-05	0.000213481	yes
TCONS_00002967	TCONS_00002967	j	XLOC_001517	AGAP007724	AGAP007724-RC	TSS2152	2L:49308583-49321011	3299	-	Res	Sus	OK	7.58161	5.09595	10.0673	2.33099	1.44333	3.21864	-1.17943	4.69429	2.67535e-06	5.40744e-05	yes
TCONS_00002968	TCONS_00002968	j	XLOC_001517	AGAP007724	AGAP007724-RC	TSS2152	2L:49308583-49321011	2420	-	Res	Sus	OK	2.23593	1.28914	3.18273	9.00829	6.0559	11.9607	1.39349	-5.2048	1.94208e-07	5.31909e-06	yes
TCONS_00002979	TCONS_00002979	j	XLOC_001519	AGAP007727	AGAP007727-RA	TSS2159	2L:49336203-49343400	3321	-	Res	Sus	OK	1.644	0.958873	2.32912	0.213635	0.0352003	0.39207	-2.04062	4.37231	1.22939e-05	0.000200311	yes
TCONS_00002980	TCONS_00002980	j	XLOC_001519	AGAP007727	AGAP007727-RA	TSS2159	2L:49336203-49343400	3134	-	Res	Sus	OK	1.17133	0.632834	1.70982	0.165172	0.00621628	0.324127	-1.95891	3.6734	0.000239342	0.00244399	yes
TCONS_00002988	TCONS_00002988	j	XLOC_001521	AGAP007730	AGAP007730-RA	TSS2165	2L:49350312-49356343	2707	-	Res	Sus	OK	1.42121	0.761341	2.08107	0.0999218	0	0.232324	-2.65487	3.78173	0.000155744	0.00171454	yes
TCONS_00002989	TCONS_00002989	j	XLOC_001521	AGAP007730	AGAP007730-RA	TSS2166	2L:49350312-49356343	638	-	Res	Sus	OK	4.07177	1.95742	6.18611	0	0	0	-1.79769e+308	-1.79769e+308	5.86841e-05	0.00076381	yes
TCONS_00002994	TCONS_00002994	j	XLOC_001525	AGAP004682	AGAP004682-RA	TSS2173	2L:433459-461768	2238	-	Res	Sus	OK	10.5988	7.14383	14.0539	4.52116	2.92575	6.11658	-0.851976	3.54693	0.000389743	0.00365264	yes
TCONS_00003000	TCONS_00003000	j	XLOC_001529	AGAP004685	AGAP004685-RB	TSS2179	2L:490822-499079	2766	-	Res	Sus	OK	1.59609	0.879191	2.31299	0	0	0	-1.79769e+308	-1.79769e+308	4.23856e-06	8.04725e-05	yes
TCONS_00003013	TCONS_00003013	j	XLOC_001537	AGAP004691	AGAP004691-RA	TSS2193	2L:1270188-1301023	1426	-	Res	Sus	OK	4.38123	2.58452	6.17794	0.541255	0.0771529	1.00536	-2.09119	4.40031	1.08098e-05	0.000179376	yes
TCONS_00003014	TCONS_00003014	j	XLOC_001538	AGAP004693	AGAP004693-RA	TSS2194	2L:1527132-1533479	3880	-	Res	Sus	OK	1.02324	0.551823	1.49465	0.257481	0.0687164	0.446245	-1.37978	3.18707	0.00143722	0.0104197	yes
TCONS_00003018	TCONS_00003018	j	XLOC_001539	AGAP004694	AGAP004694-RA	TSS2196	2L:1594197-1627124	1462	-	Res	Sus	OK	3.46853	1.90058	5.03649	1.0166	0.334757	1.69845	-1.22727	3.03468	0.00240792	0.0155739	yes
TCONS_00003039	TCONS_00003039	j	XLOC_001549	AGAP004722	AGAP004722-RA	TSS2213	2L:2726420-2796481	2672	-	Res	Sus	OK	0.481155	0.142104	0.820206	0	0	0	-1.79769e+308	-1.79769e+308	0.00226813	0.0148614	yes
TCONS_00003046	TCONS_00003046	j	XLOC_001553	AGAP004729	AGAP004729-RA	TSS2221	2L:2844346-2847575	2447	-	Res	Sus	OK	0.659472	0.271747	1.0472	0.11591	0	0.259109	-1.73862	2.54149	0.0110382	0.0460164	yes
TCONS_00003047	TCONS_00003047	j	XLOC_001554	AGAP004731	AGAP004731-RA	TSS2222	2L:2867011-2962307	1382	-	Res	Sus	OK	1.26667	0.495697	2.03765	0	0	0	-1.79769e+308	-1.79769e+308	0.000508297	0.00450534	yes
TCONS_00003048	TCONS_00003048	j	XLOC_001554	AGAP004731	AGAP004731-RA	TSS2223	2L:2867011-2962307	1572	-	Res	Sus	OK	5.44808	3.36134	7.53482	2.18726	1.16641	3.20811	-0.912612	3.02304	0.00250247	0.0160349	yes
TCONS_00003050	TCONS_00003050	j	XLOC_001555	AGAP004732	AGAP004732-RA	TSS2225	2L:2867011-2962307	8705	-	Res	Sus	OK	13.3347	9.21422	17.4551	6.91916	4.76421	9.07412	-0.656074	2.9908	0.00278249	0.0173578	yes
TCONS_00003052	TCONS_00003052	j	XLOC_001555	AGAP004734	AGAP004734-RA	TSS2228	2L:2867011-2962307	7297	-	Res	Sus	OK	3.21507	2.15286	4.27728	0.968785	0.589313	1.34826	-1.19956	4.68187	2.84272e-06	5.69615e-05	yes
TCONS_00003060	TCONS_00003060	j	XLOC_001561	AGAP004745	AGAP004745-RB	TSS2235	2L:3026366-3030332	3408	-	Res	Sus	OK	1.67457	0.99822	2.35092	0.415967	0.174018	0.657916	-1.39271	3.93346	8.37332e-05	0.00102116	yes
TCONS_00003064	TCONS_00003064	j	XLOC_001562	AGAP004747	AGAP004747-RA	TSS2237	2L:3033981-3037851	2930	-	Res	Sus	OK	3.89307	2.49858	5.28755	0.124101	0	0.26884	-3.44586	5.64864	1.61724e-08	6.00149e-07	yes
TCONS_00003078	TCONS_00003078	j	XLOC_001570	AGAP004767	AGAP004767-RA	TSS2249	2L:3189833-3213653	4496	-	Res	Sus	OK	3.18664	2.06738	4.30589	1.34524	0.802612	1.88787	-0.862392	3.22476	0.00126077	0.00939047	yes
TCONS_00003088	TCONS_00003088	j	XLOC_001575	AGAP004775	AGAP004775-RB	TSS2258	2L:3400989-3447437	2135	-	Res	Sus	OK	15.6546	10.6258	20.6835	6.60352	4.3321	8.87495	-0.863164	3.66798	0.000244478	0.00248608	yes
TCONS_00003092	TCONS_00003092	j	XLOC_001577	AGAP004780	AGAP004780-RA	TSS2261	2L:3452498-3461044	6871	-	Res	Sus	OK	1.39004	0.875067	1.90501	0.334717	0.161835	0.507599	-1.4238	4.47997	7.46547e-06	0.000130766	yes
TCONS_00003093	TCONS_00003093	j	XLOC_001577	AGAP004780	AGAP004780-RA	TSS2261	2L:3452498-3461044	6524	-	Res	Sus	OK	0.78769	0.452434	1.12295	0.0911555	0.0068919	0.175419	-2.15654	4.23818	2.2534e-05	0.000336584	yes
TCONS_00003103	TCONS_00003103	j	XLOC_001581	AGAP004783	AGAP004783-RA	TSS2268	2L:3477045-3535410	1987	-	Res	Sus	OK	3.65045	2.16707	5.13383	0.60252	0.170086	1.03495	-1.80149	4.3685	1.25101e-05	0.000203009	yes
TCONS_00003108	TCONS_00003108	j	XLOC_001585	AGAP004795	AGAP004795-RA	TSS2274	2L:3605332-3635049	3303	-	Res	Sus	OK	2.61903	1.6033	3.63477	0	0	0	-1.79769e+308	-1.79769e+308	1.25518e-07	3.62688e-06	yes
TCONS_00003111	TCONS_00003111	j	XLOC_001587	AGAP004798	AGAP004798-RA	TSS2281	2L:3638636-3668441	2467	-	Res	Sus	OK	5.66611	3.70796	7.62426	1.78355	1.02897	2.53813	-1.1559	4.23186	2.31765e-05	0.0003442	yes
TCONS_00003115	TCONS_00003115	j	XLOC_001589	AGAP004800	AGAP004800-RA	TSS2286	2L:3728663-3733779	4097	-	Res	Sus	OK	2.47893	1.57322	3.38464	0.328666	0.123619	0.533713	-2.02054	5.58942	2.27828e-08	8.06133e-07	yes
TCONS_00003117	TCONS_00003117	j	XLOC_001590	AGAP004803	AGAP004803-RA	TSS2287	2L:3745874-3749568	3497	-	Res	Sus	OK	8.39381	5.64898	11.1386	4.49818	2.95321	6.04316	-0.623821	2.63083	0.00851761	0.0388929	yes
TCONS_00003129	TCONS_00003129	j	XLOC_001598	LIG_ANOGA	AGAP004817-RA	TSS2300	2L:3843007-3856078	5475	-	Res	Sus	OK	0	0	0	0.422439	0.204915	0.639964	1.79769e+308	1.79769e+308	5.13633e-05	0.000683857	yes
TCONS_00003131	TCONS_00003131	j	XLOC_001598	LIG_ANOGA	AGAP004817-RA	TSS2297	2L:3843007-3856078	5686	-	Res	Sus	OK	0	0	0	1.06556	0.643552	1.48757	1.79769e+308	1.79769e+308	2.20964e-07	5.95941e-06	yes
TCONS_00003136	TCONS_00003136	j	XLOC_001599	AGAP004819	AGAP004819-RB	TSS2302	2L:3860780-3870405	915	-	Res	Sus	OK	11.0028	6.90576	15.0999	1.82455	0.737303	2.9118	-1.79682	5.11423	3.15028e-07	8.16206e-06	yes
TCONS_00003151	TCONS_00003151	j	XLOC_001607	AGAP004834	AGAP004834-RB	TSS2314	2L:4242673-4252296	1348	-	Res	Sus	OK	1.28339	0.492871	2.07391	0	0	0	-1.79769e+308	-1.79769e+308	0.000583231	0.00502517	yes
TCONS_00003153	TCONS_00003153	j	XLOC_001607	AGAP004834	AGAP004834-RB	TSS2313	2L:4242673-4252296	2900	-	Res	Sus	OK	0.834108	0.387721	1.2805	0	0	0	-1.79769e+308	-1.79769e+308	9.30587e-05	0.00111305	yes
TCONS_00003163	TCONS_00003163	j	XLOC_001612	AGAP004841	AGAP004841-RA	TSS2320	2L:4379721-4392490	5519	-	Res	Sus	OK	3.46922	2.30831	4.63013	0.793887	0.451976	1.1358	-1.47474	5.40791	6.3763e-08	1.99109e-06	yes
TCONS_00003170	TCONS_00003170	j	XLOC_001617	AGAP004852	AGAP004852-RB	TSS2329	2L:4465394-4475550	5288	-	Res	Sus	OK	7.20226	4.9092	9.49532	3.20913	2.13492	4.28333	-0.808396	3.49981	0.000465599	0.00420717	yes
TCONS_00003181	TCONS_00003181	j	XLOC_001624	AGAP004864	AGAP004864-RA	TSS2338	2L:4582892-4592843	4712	-	Res	Sus	OK	1.12242	0.651968	1.59286	2.38774	1.55483	3.22064	0.754862	-2.76859	0.00562987	0.02905	yes
TCONS_00003183	TCONS_00003183	j	XLOC_001624	AGAP004864	AGAP004864-RA	TSS2339	2L:4582892-4592843	2162	-	Res	Sus	OK	7.57663	5.0447	10.1086	2.07368	1.2198	2.92756	-1.29574	4.88674	1.02519e-06	2.31735e-05	yes
TCONS_00003190	TCONS_00003190	j	XLOC_001627	AGAP004866	AGAP004866-RA	TSS2343	2L:4666860-4676547	8147	-	Res	Sus	OK	1.96187	1.28789	2.63584	0.913764	0.564084	1.26344	-0.764078	2.97156	0.0029629	0.0182332	yes
TCONS_00003195	TCONS_00003195	j	XLOC_001631	AGAP004873	AGAP004873-RA	TSS2350	2L:4768420-4817307	1349	-	Res	Sus	OK	10.9887	7.30668	14.6708	3.41815	2.04317	4.79313	-1.16777	4.46111	8.15358e-06	0.000141082	yes
TCONS_00003210	TCONS_00003210	j	XLOC_001637	AGAP004886	AGAP004886-RB	TSS2366	2L:4954505-4968464	3235	-	Res	Sus	OK	5.11836	3.36307	6.87366	0.632601	0.287243	0.977959	-2.09075	6.48586	8.8227e-11	5.76717e-09	yes
TCONS_00003214	TCONS_00003214	j	XLOC_001637	AGAP004886	AGAP004886-RB	TSS2367	2L:4954505-4968464	3281	-	Res	Sus	OK	5.3647	3.51883	7.21058	2.07374	1.24082	2.90666	-0.950488	3.59434	0.000325212	0.00314955	yes
TCONS_00003225	TCONS_00003225	j	XLOC_001644	AGAP004896	AGAP004896-RB	TSS2375	2L:5501401-5516218	1081	-	Res	Sus	OK	1.89584	0.803367	2.98831	0	0	0	-1.79769e+308	-1.79769e+308	0.000259522	0.00261795	yes
TCONS_00003235	TCONS_00003235	j	XLOC_001651	AGAP004910	AGAP004910-RA	TSS2384	2L:5815576-5819743	2227	-	Res	Sus	OK	3.92548	2.41395	5.43701	1.38604	0.709376	2.0627	-1.04104	3.3486	0.000812214	0.00658774	yes
TCONS_00003238	TCONS_00003238	j	XLOC_001653	AGAP004916	AGAP004916-RA	TSS2387	2L:5996794-6009301	948	-	Res	Sus	OK	48.569	33.3021	63.836	20.3927	13.6682	27.1173	-0.867807	3.80977	0.000139097	0.0015581	yes
TCONS_00003243	TCONS_00003243	j	XLOC_001656	CASPS11	AGAP004922-RA	TSS2390	2L:6049762-6053107	360	-	Res	Sus	OK	6.2109	2.75317	9.66863	1.27547	0	2.6595	-1.58299	2.59593	0.00943341	0.0416397	yes
TCONS_00003244	TCONS_00003244	j	XLOC_001657	AGAP004923	AGAP004923-RA	TSS2391	2L:6086936-6106464	1426	-	Res	Sus	OK	0.716508	0.13846	1.29456	0	0	0	-1.79769e+308	-1.79769e+308	0.00658642	0.0323586	yes
TCONS_00003245	TCONS_00003245	j	XLOC_001657	AGAP004923	AGAP004923-RA	TSS2392	2L:6086936-6106464	2537	-	Res	Sus	OK	1.54991	0.823155	2.27666	0.242069	0.00877033	0.475367	-1.85673	3.46475	0.000530732	0.00465002	yes
TCONS_00003255	TCONS_00003255	j	XLOC_001664	AGAP004937	AGAP004937-RA	TSS2397	2L:6209534-6223303	11713	-	Res	Sus	OK	2.8037	1.90441	3.70299	0.297411	0.161887	0.432935	-2.24358	8.05236	8.88178e-16	1.45684e-13	yes
TCONS_00003258	TCONS_00003258	j	XLOC_001665	AGAP004938	AGAP004938-RA	TSS2399	2L:6224026-6227951	1803	-	Res	Sus	OK	6.56116	4.17226	8.95006	2.51668	1.39575	3.6376	-0.958228	3.33135	0.000864268	0.00693473	yes
TCONS_00003262	TCONS_00003262	j	XLOC_001667	AGAP004942	AGAP004942-RA	TSS2400	2L:6371583-6437218	4157	-	Res	Sus	OK	4.26936	2.83722	5.70151	11.3209	7.79306	14.8487	0.975184	-4.25979	2.04621e-05	0.000309938	yes
TCONS_00003263	TCONS_00003263	j	XLOC_001667	AGAP004942	AGAP004942-RA	TSS2400	2L:6371583-6437218	3992	-	Res	Sus	OK	6.10855	4.11781	8.0993	0	0	0	-1.79769e+308	-1.79769e+308	4.20615e-10	2.37022e-08	yes
TCONS_00003266	TCONS_00003266	j	XLOC_001667	AGAP004942	AGAP004942-RA	TSS2402	2L:6371583-6437218	994	-	Res	Sus	OK	3.83138	2.06451	5.59824	0.985884	0.274679	1.69709	-1.35744	3.17088	0.0015198	0.0109091	yes
TCONS_00003268	TCONS_00003268	j	XLOC_001668	AGAP004944	AGAP004944-RA	TSS2403	2L:6525481-6549612	7110	-	Res	Sus	OK	2.24282	1.46329	3.02235	0.24932	0.100049	0.398592	-2.19675	6.34635	2.2049e-10	1.31469e-08	yes
TCONS_00003301	TCONS_00003301	j	XLOC_001696	AGAP004989	AGAP004989-RB	TSS2438	2L:7552109-7584213	4848	-	Res	Sus	OK	0.390526	0.16464	0.616412	0	0	0	-1.79769e+308	-1.79769e+308	0.000272381	0.00271722	yes
TCONS_00003312	TCONS_00003312	j	XLOC_001703	GPRNNA18	AGAP005002-RB	TSS2446	2L:7769053-7775626	1554	-	Res	Sus	OK	1.35598	0.553434	2.15852	0.0912553	0	0.249836	-2.69862	2.94001	0.00328205	0.0196305	yes
TCONS_00003323	TCONS_00003323	j	XLOC_001708	AGAP005015	AGAP005015-RA	TSS2454	2L:8300315-8324181	3723	-	Res	Sus	OK	8.47607	5.75717	11.195	1.01719	0.565259	1.46913	-2.1202	7.73807	9.99201e-15	1.33196e-12	yes
TCONS_00003337	TCONS_00003337	j	XLOC_001717	AGAP005031	AGAP005031-RB	TSS2466	2L:8612220-8621144	3590	-	Res	Sus	OK	1.7832	1.05564	2.51076	0	0	0	-1.79769e+308	-1.79769e+308	4.74634e-07	1.17324e-05	yes
TCONS_00003340	TCONS_00003340	j	XLOC_001717	AGAP005031	AGAP005031-RB	TSS2466	2L:8612220-8621144	2087	-	Res	Sus	OK	1.23892	0.583066	1.89477	0	0	0	-1.79769e+308	-1.79769e+308	7.90306e-05	0.000976223	yes
TCONS_00003349	TCONS_00003349	j	XLOC_001722	AGAP005039	AGAP005039-RA	TSS2477	2L:8664634-8707939	6329	-	Res	Sus	OK	0.779208	0.438571	1.11984	0.110383	0.0124914	0.208275	-1.95432	3.9532	7.71127e-05	0.000956549	yes
TCONS_00003361	TCONS_00003361	j	XLOC_001727	AGAP005044	AGAP005044-RB	TSS2485	2L:8787247-8791505	1047	-	Res	Sus	OK	0.751263	0.0850184	1.41751	0	0	0	-1.79769e+308	-1.79769e+308	0.0120599	0.0490838	yes
TCONS_00003381	TCONS_00003381	j	XLOC_001738	AGAP005068	AGAP005068-RA	TSS2503	2L:9316387-9332298	1692	-	Res	Sus	OK	1.61196	0.763002	2.46092	0.30795	0	0.635197	-1.65527	2.79132	0.00524928	0.0275862	yes
TCONS_00003385	TCONS_00003385	j	XLOC_001740	AGAP005071	AGAP005071-RB	TSS2506	2L:9486308-9510088	1326	-	Res	Sus	OK	6.12586	3.61284	8.63888	1.45853	0.546925	2.37013	-1.43509	3.8391	0.000123485	0.00140935	yes
TCONS_00003394	TCONS_00003394	j	XLOC_001744	AGAP005080	AGAP005080-RA	TSS2513	2L:9757385-9758459	516	-	Res	Sus	OK	2.99304	1.07722	4.90887	0.289691	0	0.763238	-2.33523	2.66045	0.00780367	0.0364246	yes
TCONS_00003415	TCONS_00003415	j	XLOC_001762	AGAP005115	AGAP005115-RA	TSS2528	2L:10234694-10238631	3149	-	Res	Sus	OK	1.47116	0.829205	2.11311	0.0757907	0	0.179064	-2.96583	4.14577	3.38667e-05	0.000479097	yes
TCONS_00003425	TCONS_00003425	j	XLOC_001768	AGAP005124	AGAP005124-RC	TSS2534	2L:10257650-10275004	2462	-	Res	Sus	OK	2.0395	1.11967	2.95933	0.743886	0.296298	1.19147	-1.00857	2.68253	0.00730673	0.0348988	yes
TCONS_00003426	TCONS_00003426	j	XLOC_001768	AGAP005124	AGAP005124-RC	TSS2534	2L:10257650-10275004	2386	-	Res	Sus	OK	0.810692	0.312892	1.30849	0	0	0	-1.79769e+308	-1.79769e+308	0.00056278	0.00488041	yes
TCONS_00003429	TCONS_00003429	j	XLOC_001769	AGAP005125	AGAP005125-RA	TSS2536	2L:10285194-10301311	3411	-	Res	Sus	OK	2.72649	1.70184	3.75114	0.768053	0.380532	1.15557	-1.26691	4.0275	5.63728e-05	0.000737426	yes
TCONS_00003443	TCONS_00003443	j	XLOC_001778	AGAP005138	AGAP005138-RA	TSS2549	2L:10441031-10459808	1588	-	Res	Sus	OK	1.27393	0.55481	1.99304	0.107353	0	0.275398	-2.47374	2.97319	0.00294723	0.0181672	yes
TCONS_00003446	TCONS_00003446	j	XLOC_001780	AGAP005143	AGAP005143-RA	TSS2553	2L:10472271-10560094	5532	-	Res	Sus	OK	3.43526	2.2743	4.59622	0.895454	0.512861	1.27805	-1.34452	4.93616	7.96757e-07	1.86303e-05	yes
TCONS_00003449	TCONS_00003449	j	XLOC_001781	AGAP005147	AGAP005147-RB	TSS2557	2L:10565294-10575499	4771	-	Res	Sus	OK	0.91056	0.495797	1.32532	0.316777	0.121797	0.511757	-1.05586	2.7578	0.00581918	0.0297693	yes
TCONS_00003460	TCONS_00003460	j	XLOC_001787	AGAP005160	AGAP005160-RD	TSS2567	2L:10778204-10811531	5414	-	Res	Sus	OK	8.08044	5.53645	10.6244	1.79028	1.14419	2.43637	-1.50707	6.29368	3.1003e-10	1.8023e-08	yes
TCONS_00003463	TCONS_00003463	j	XLOC_001787	AGAP005160	AGAP005160-RD	TSS2569	2L:10778204-10811531	5739	-	Res	Sus	OK	3.20229	2.13056	4.27403	0	0	0	-1.79769e+308	-1.79769e+308	1.1441e-09	5.81581e-08	yes
TCONS_00003468	TCONS_00003468	j	XLOC_001788	AGAP005162	AGAP005162-RB	TSS2575	2L:10817099-10888356	7973	-	Res	Sus	OK	5.62093	3.85052	7.39134	3.09551	2.09307	4.09796	-0.596543	2.64105	0.00826506	0.0380429	yes
TCONS_00003474	TCONS_00003474	j	XLOC_001790	AGAP005164	AGAP005164-RA	TSS2580	2L:11053066-11119388	4129	-	Res	Sus	OK	1.94316	1.18541	2.70091	0.42348	0.176172	0.670788	-1.52357	4.3393	1.4294e-05	0.00022736	yes
TCONS_00003476	TCONS_00003476	j	XLOC_001791	AGAP005165	AGAP005165-RA	TSS2583	2L:11130783-11260999	5263	-	Res	Sus	OK	1.73203	1.09017	2.37388	0.0797821	0	0.166001	-3.07775	5.38796	7.12616e-08	2.18656e-06	yes
TCONS_00003479	TCONS_00003479	j	XLOC_001792	AGAP005170	AGAP005170-RA	TSS2584	2L:11283755-11334904	3049	-	Res	Sus	OK	5.48856	3.60653	7.37059	0.365539	0.107022	0.624056	-2.70905	6.89355	5.44187e-12	4.61753e-10	yes
TCONS_00003483	TCONS_00003483	j	XLOC_001794	AGAP005173	AGAP005173-RA	TSS2587	2L:11368158-11375772	2876	-	Res	Sus	OK	3.69591	2.34618	5.04563	1.55186	0.877195	2.22653	-0.867769	3.05672	0.00223773	0.0147015	yes
TCONS_00003508	TCONS_00003508	j	XLOC_001809	PGRPLC	AGAP005203-RB	TSS2606	2L:12198710-12208633	2915	-	Res	Sus	OK	1.39835	0.758922	2.03777	4.42561	2.89243	5.95878	1.15212	-4.01655	5.90559e-05	0.000767518	yes
TCONS_00003517	TCONS_00003517	j	XLOC_001810	PGRPLA	AGAP005205-RC	TSS2611	2L:12211357-12220968	1231	-	Res	Sus	OK	1.57483	0.636465	2.51319	0	0	0	-1.79769e+308	-1.79769e+308	0.000394617	0.00368579	yes
TCONS_00003525	TCONS_00003525	j	XLOC_001812	AGAP005209	AGAP005209-RA	TSS2616	2L:12353161-12356229	1796	-	Res	Sus	OK	2.44427	1.34094	3.5476	0.233235	0	0.498298	-2.34945	3.84267	0.000121705	0.00139228	yes
TCONS_00003526	TCONS_00003526	j	XLOC_001813	AGAP005211	AGAP005211-RA	TSS2617	2L:12357076-12360869	1806	-	Res	Sus	OK	2.49943	1.39509	3.60377	0.219781	0	0.469712	-2.43119	3.98554	6.73257e-05	0.000854853	yes
TCONS_00003542	TCONS_00003542	j	XLOC_001823	AGAP005228	AGAP005228-RA	TSS2628	2L:12535041-12539866	2295	-	Res	Sus	OK	3.79867	2.30725	5.29008	1.08005	0.495036	1.66507	-1.25764	3.75986	0.000170008	0.00184396	yes
TCONS_00003546	TCONS_00003546	j	XLOC_001825	AGAP005230	AGAP005230-RA	TSS2633	2L:12594128-12609112	4198	-	Res	Sus	OK	5.76739	3.86746	7.66732	0.644889	0.322031	0.967747	-2.1909	7.3115	2.64233e-13	2.8436e-11	yes
TCONS_00003557	TCONS_00003557	j	XLOC_001832	AGAP005243	AGAP005243-RA	TSS2641	2L:12718546-12767586	5842	-	Res	Sus	OK	0.412924	0.187832	0.638017	0	0	0	-1.79769e+308	-1.79769e+308	0.000121783	0.0013928	yes
TCONS_00003558	TCONS_00003558	j	XLOC_001832	AGAP005243	AGAP005243-RA	TSS2642	2L:12718546-12767586	6924	-	Res	Sus	OK	2.34047	1.53531	3.14564	0.206983	0.0774878	0.336478	-2.42547	6.79426	1.08868e-11	8.68644e-10	yes
TCONS_00003561	TCONS_00003561	j	XLOC_001833	AGAP005244	AGAP005244-RB	TSS2645	2L:12776812-12857673	8501	-	Res	Sus	OK	3.51888	2.38677	4.651	0.446146	0.248441	0.643852	-2.06525	7.54274	4.59632e-14	5.58688e-12	yes
TCONS_00003572	TCONS_00003572	j	XLOC_001839	AGAP005255	AGAP005255-RA	TSS2653	2L:13240823-13250638	4319	-	Res	Sus	OK	24.3311	16.7669	31.8953	10.8549	7.46171	14.2481	-0.807136	3.66156	0.000250686	0.00253752	yes
TCONS_00003581	TCONS_00003581	j	XLOC_001847	AGAP005269	AGAP005269-RA	TSS2662	2L:13494050-13501353	6004	-	Res	Sus	OK	1.37713	0.850219	1.90404	0.110868	0.0113781	0.210359	-2.51941	5.16518	2.40205e-07	6.38853e-06	yes
TCONS_00003592	TCONS_00003592	j	XLOC_001854	AGAP005292	AGAP005292-RA	TSS2671	2L:13753944-13780696	11546	-	Res	Sus	OK	13.5102	9.25392	17.7666	7.61094	5.24828	9.9736	-0.573862	2.59496	0.00946016	0.0417202	yes
TCONS_00003597	TCONS_00003597	j	XLOC_001857	AGAP005300	AGAP005300-RC	TSS2675	2L:13814043-13859062	6299	-	Res	Sus	OK	6.77865	4.62415	8.93315	2.87637	1.9217	3.83104	-0.857249	3.73089	0.000190805	0.00202767	yes
TCONS_00003633	TCONS_00003633	j	XLOC_001883	AGAP005351	AGAP005351-RA	TSS2710	2L:14444615-14450861	4065	-	Res	Sus	OK	1.53067	0.909183	2.15216	0.125341	0	0.25185	-2.50242	4.6004	4.21684e-06	8.00946e-05	yes
TCONS_00003634	TCONS_00003634	j	XLOC_001883	AGAP005351	AGAP005351-RA	TSS2711	2L:14444615-14450861	3626	-	Res	Sus	OK	5.28677	3.52772	7.04582	1.59434	0.961817	2.22687	-1.19875	4.63028	3.6518e-06	7.07013e-05	yes
TCONS_00003643	TCONS_00003643	j	XLOC_001889	AGAP005369	AGAP005369-RB	TSS2720	2L:14698418-14706996	3789	-	Res	Sus	OK	16.7987	11.5894	22.0079	8.23043	5.61848	10.8424	-0.71346	3.21591	0.00130031	0.00963937	yes
TCONS_00003652	TCONS_00003652	j	XLOC_001895	AGAP005378	AGAP005378-RA	TSS2727	2L:14731452-14828550	7061	-	Res	Sus	OK	1.09076	0.667171	1.51435	2.86607	1.92704	3.80509	0.966065	-3.80273	0.00014311	0.00159657	yes
TCONS_00003653	TCONS_00003653	j	XLOC_001895	AGAP005378	AGAP005378-RA	TSS2727	2L:14731452-14828550	7061	-	Res	Sus	OK	13.9747	9.65773	18.2918	1.22861	0.779323	1.67789	-2.43137	10.1582	0	0	yes
TCONS_00003666	TCONS_00003666	j	XLOC_001903	AGAP005390	AGAP005390-RB	TSS2736	2L:14856792-14866347	1374	-	Res	Sus	OK	1.53677	0.688596	2.38495	0.191824	0	0.449031	-2.08086	2.87015	0.00410273	0.0231727	yes
TCONS_00003695	TCONS_00003695	j	XLOC_001921	AGAP005425	AGAP005425-RA	TSS2760	2L:15380484-15420263	5560	-	Res	Sus	OK	2.43637	1.59688	3.27585	0	0	0	-1.79769e+308	-1.79769e+308	3.22909e-09	1.43337e-07	yes
TCONS_00003708	TCONS_00003708	j	XLOC_001930	AGAP005440	AGAP005440-RA	TSS2772	2L:15473700-15499680	7978	-	Res	Sus	OK	10.3912	7.16373	13.6186	5.56095	3.82194	7.29995	-0.625187	2.83692	0.00455504	0.0250009	yes
TCONS_00003713	TCONS_00003713	j	XLOC_001936	AGAP005449	AGAP005449-RA	TSS2778	2L:15557429-15634847	2282	-	Res	Sus	OK	0.449716	0.113467	0.785965	0	0	0	-1.79769e+308	-1.79769e+308	0.00373759	0.0215912	yes
TCONS_00003716	TCONS_00003716	j	XLOC_001936	AGAP005449	AGAP005449-RB	TSS2780	2L:15557429-15634847	5033	-	Res	Sus	OK	1.22085	0.719577	1.72213	0.188256	0.0480578	0.328454	-1.8695	4.39671	1.09904e-05	0.000181962	yes
TCONS_00003729	TCONS_00003729	j	XLOC_001947	AGAP005472	AGAP005472-RA	TSS2790	2L:16000528-16067300	8271	-	Res	Sus	OK	3.20677	2.16639	4.24714	1.53681	1.00808	2.06554	-0.735552	3.1109	0.00186519	0.012809	yes
TCONS_00003744	TCONS_00003744	j	XLOC_001957	AGAP005490	AGAP005490-RA	TSS2802	2L:16178641-16198945	7055	-	Res	Sus	OK	2.568	1.70801	3.42799	0.739458	0.437498	1.04142	-1.24497	4.71478	2.41968e-06	4.94276e-05	yes
TCONS_00003763	TCONS_00003763	j	XLOC_001966	AGAP005505	AGAP005505-RA	TSS2817	2L:16282516-16291143	1899	-	Res	Sus	OK	0	0	0	1.5529	0.814217	2.29157	1.79769e+308	1.79769e+308	1.30814e-05	0.000211116	yes
TCONS_00003772	TCONS_00003772	j	XLOC_001968	AGAP005510	AGAP005510-RA	TSS2827	2L:16486934-16537376	2909	-	Res	Sus	OK	0.952851	0.466594	1.43911	0	0	0	-1.79769e+308	-1.79769e+308	4.44352e-05	0.000604754	yes
TCONS_00003774	TCONS_00003774	j	XLOC_001968	AGAP005510	AGAP005510-RA	TSS2827	2L:16486934-16537376	1087	-	Res	Sus	OK	1.33452	0.419547	2.24949	0	0	0	-1.79769e+308	-1.79769e+308	0.00176666	0.0122563	yes
TCONS_00003783	TCONS_00003783	j	XLOC_001975	AGAP013280	AGAP013280-RA	TSS2837	2L:16610935-16613808	440	-	Res	Sus	OK	2.53015	0.681389	4.37891	0	0	0	-1.79769e+308	-1.79769e+308	0.00309888	0.0188258	yes
TCONS_00003786	TCONS_00003786	j	XLOC_001975	AGAP005524	AGAP005524-RA	TSS2839	2L:16610935-16613808	1920	-	Res	Sus	OK	1.78674	0.92278	2.6507	0.296482	0.00338859	0.589576	-1.79616	3.26429	0.00109739	0.00840922	yes
TCONS_00003794	TCONS_00003794	j	XLOC_001980	AGAP005533	AGAP005533-RA	TSS2846	2L:16670704-16684435	5254	-	Res	Sus	OK	3.40016	2.23941	4.5609	0.54371	0.270872	0.816548	-1.83316	6.04087	1.53284e-09	7.46508e-08	yes
TCONS_00003798	TCONS_00003798	j	XLOC_001982	AGAP005537	AGAP005537-RA	TSS2852	2L:16717593-16854541	3363	-	Res	Sus	OK	2.45012	1.50264	3.3976	0.88401	0.45447	1.31355	-1.01942	3.28318	0.00102645	0.00798483	yes
TCONS_00003811	TCONS_00003811	j	XLOC_001991	AGAP005555	AGAP005555-RA	TSS2861	2L:17000031-17004739	2388	-	Res	Sus	OK	1.22449	0.635481	1.81349	0	0	0	-1.79769e+308	-1.79769e+308	1.60659e-05	0.000251731	yes
TCONS_00003816	TCONS_00003816	j	XLOC_001992	AGAP005556	AGAP005556-RB	TSS2864	2L:17005124-17022895	1643	-	Res	Sus	OK	3.12102	1.78735	4.45469	0.554564	0.129485	0.979643	-1.72773	3.93751	8.23306e-05	0.0010074	yes
TCONS_00003833	TCONS_00003833	j	XLOC_002002	AGAP005572	AGAP005572-RA	TSS2884	2L:17331177-17333442	2024	-	Res	Sus	OK	1.60735	0.819138	2.39555	0.295859	0.0128206	0.578896	-1.69246	3.14868	0.00164009	0.01156	yes
TCONS_00003836	TCONS_00003836	j	XLOC_002005	AGAP005575	AGAP005575-RA	TSS2889	2L:17339714-17343861	592	-	Res	Sus	OK	2.44743	0.808946	4.08591	0.243139	0	0.645195	-2.30916	2.58876	0.00963213	0.042238	yes
TCONS_00003837	TCONS_00003837	j	XLOC_002005	AGAP005575	AGAP005575-RA	TSS2888	2L:17339714-17343861	2894	-	Res	Sus	OK	4.98592	3.23622	6.73561	2.43085	1.47182	3.38987	-0.718377	2.72105	0.00650752	0.0321392	yes
TCONS_00003862	TCONS_00003862	j	XLOC_002027	AGAP005616	AGAP005616-RA	TSS2903	2L:17875649-17877471	1498	-	Res	Sus	OK	3.93814	2.348	5.52828	0.517926	0.104208	0.931644	-2.02863	4.533	5.81505e-06	0.000105241	yes
TCONS_00003873	TCONS_00003873	j	XLOC_002037	AGAP005635	AGAP005635-RB	TSS2913	2L:18059003-18067877	3557	-	Res	Sus	OK	2.35593	1.46692	3.24493	0.204239	0.0340121	0.374465	-2.4454	5.34566	9.00886e-08	2.69673e-06	yes
TCONS_00003882	TCONS_00003882	j	XLOC_002041	AGAP005644	AGAP005644-RA	TSS2923	2L:18168987-18189215	5158	-	Res	Sus	OK	4.37898	2.93846	5.81949	2.00465	1.29303	2.71626	-0.781348	3.2289	0.00124268	0.00927607	yes
TCONS_00003909	TCONS_00003909	j	XLOC_002061	AGAP005680	AGAP005680-RA	TSS2944	2L:18548555-18710890	4306	-	Res	Sus	OK	0.33131	0.105567	0.557052	1.16514	0.667615	1.66267	1.25754	-3.12779	0.00176125	0.0122284	yes
TCONS_00003940	TCONS_00003940	j	XLOC_002084	SCRB3	AGAP005725-RA	TSS2975	2L:19651932-19695694	2836	-	Res	Sus	OK	3.59015	2.22995	4.95035	0	0	0	-1.79769e+308	-1.79769e+308	6.4995e-08	2.02669e-06	yes
TCONS_00003946	TCONS_00003946	j	XLOC_002087	AGAP005729	AGAP005729-RA	TSS2980	2L:19788304-19921476	5111	-	Res	Sus	OK	3.78922	2.52068	5.05776	1.64488	1.03417	2.2556	-0.834491	3.33846	0.000842431	0.00679784	yes
TCONS_00003956	TCONS_00003956	j	XLOC_002092	AGAP005742	AGAP005742-RB	TSS2986	2L:20065431-20160347	5303	-	Res	Sus	OK	0.727475	0.393243	1.06171	0.106843	0.00627035	0.207416	-1.91822	3.66264	0.000249631	0.00252915	yes
TCONS_00003960	TCONS_00003960	j	XLOC_002093	AGAP005745	AGAP005745-RA	TSS2990	2L:20169877-20173336	2904	-	Res	Sus	OK	1.80671	1.04526	2.56816	0.11293	0	0.248493	-2.77249	4.35842	1.31007e-05	0.000211351	yes
TCONS_00003962	TCONS_00003962	j	XLOC_002095	GSTO1	AGAP005749-RA	TSS2995	2L:20196570-20199155	1290	-	Res	Sus	OK	2.59009	1.33481	3.84536	0.493954	0.0254286	0.962479	-1.657	3.11127	0.00186284	0.0127989	yes
TCONS_00003968	TCONS_00003968	j	XLOC_002100	AGAP005755	AGAP005755-RB	TSS3002	2L:20213366-20280333	1800	-	Res	Sus	OK	2.57732	1.38875	3.76589	0	0	0	-1.79769e+308	-1.79769e+308	7.22697e-06	0.000127245	yes
TCONS_00003969	TCONS_00003969	j	XLOC_002100	AGAP005755	AGAP005755-RB	TSS3002	2L:20213366-20280333	1801	-	Res	Sus	OK	2.60364	1.40779	3.7995	0	0	0	-1.79769e+308	-1.79769e+308	6.67021e-06	0.000118865	yes
TCONS_00003983	TCONS_00003983	j	XLOC_002109	AGAP005771	AGAP005771-RA	TSS3013	2L:20414838-20427458	8823	-	Res	Sus	OK	3.47346	2.3486	4.59831	0.587398	0.340071	0.834725	-1.7772	6.69142	2.21019e-11	1.65569e-09	yes
TCONS_00003989	TCONS_00003989	j	XLOC_002113	ASNA_ANOGA	AGAP005782-RA	TSS3021	2L:20528212-20550676	2810	-	Res	Sus	OK	11.2858	7.62461	14.947	1.12352	0.574575	1.67246	-2.30708	7.86752	3.55271e-15	5.22521e-13	yes
TCONS_00003993	TCONS_00003993	j	XLOC_002115	AGAP005785	AGAP005785-RA	TSS3025	2L:20610398-20622712	669	-	Res	Sus	OK	2.58792	1.01168	4.16417	0.186849	0	0.510227	-2.62831	2.86504	0.00416955	0.023457	yes
TCONS_00003998	TCONS_00003998	j	XLOC_002119	AGAP005789	AGAP005789-RA	TSS3029	2L:20673162-20677679	4303	-	Res	Sus	OK	1.01836	0.56042	1.4763	0.228357	0.0592268	0.397488	-1.49504	3.45089	0.000558748	0.00485213	yes
TCONS_00004013	TCONS_00004013	j	XLOC_002129	AGAP005803	AGAP005803-RA	TSS3039	2L:21200855-21236707	6710	-	Res	Sus	OK	1.9475	1.27379	2.62121	0.417892	0.219223	0.61656	-1.53908	5.23544	1.64593e-07	4.61392e-06	yes
TCONS_00004015	TCONS_00004015	j	XLOC_002129	AGAP005803	AGAP005803-RA	TSS3039	2L:21200855-21236707	4331	-	Res	Sus	OK	2.26477	1.43307	3.09647	0.951478	0.535307	1.36765	-0.867212	3.0369	0.00239025	0.01548	yes
TCONS_00004039	TCONS_00004039	j	XLOC_002145	AGAP005834	AGAP005834-RA	TSS3060	2L:22298996-22304358	1885	-	Res	Sus	OK	0.825784	0.29098	1.36059	0.0663371	0	0.184466	-2.52158	2.66152	0.0077789	0.0363397	yes
TCONS_00004043	TCONS_00004043	j	XLOC_002148	AGAP005837	AGAP005837-RA	TSS3063	2L:22316475-22318579	1783	-	Res	Sus	OK	2.62748	1.42731	3.82765	0.136399	0	0.335637	-2.9582	3.86578	0.000110737	0.00128411	yes
TCONS_00004045	TCONS_00004045	j	XLOC_002150	AGAP005839	AGAP005839-RA	TSS3065	2L:22332162-22358704	3678	-	Res	Sus	OK	3.07906	1.94947	4.20865	0.90122	0.467103	1.33534	-1.22863	4.05829	4.94338e-05	0.000662364	yes
TCONS_00004051	TCONS_00004051	j	XLOC_002155	AGAP005849	AGAP005849-RA	TSS3071	2L:22500897-22539696	1707	-	Res	Sus	OK	1.63125	0.815338	2.44716	0.350782	0.0258633	0.6757	-1.53694	2.92002	0.00350005	0.0206461	yes
TCONS_00004068	TCONS_00004068	j	XLOC_002168	AGAP005870	AGAP005870-RB	TSS3083	2L:22686595-22707992	2068	-	Res	Sus	OK	1.51177	0.746692	2.27684	0.249135	0	0.518809	-1.80304	3.01788	0.00254554	0.0162613	yes
TCONS_00004070	TCONS_00004070	j	XLOC_002168	AGAP005870	AGAP005870-RB	TSS3083	2L:22686595-22707992	1662	-	Res	Sus	OK	3.46917	2.01139	4.92696	0.636768	0.168358	1.10518	-1.69527	4.00219	6.27576e-05	0.000804022	yes
TCONS_00004103	TCONS_00004103	j	XLOC_002191	AGAP005924	AGAP005924-RA	TSS3113	2L:23691105-23741699	3525	-	Res	Sus	OK	1.09628	0.579685	1.61287	0.319573	0.0921033	0.547044	-1.23269	2.88808	0.00387607	0.0222195	yes
TCONS_00004106	TCONS_00004106	j	XLOC_002191	AGAP005925	AGAP005925-RA	TSS3115	2L:23691105-23741699	7270	-	Res	Sus	OK	0.839376	0.491361	1.18739	0.252672	0.108232	0.397111	-1.20057	3.4002	0.000673377	0.0056432	yes
TCONS_00004108	TCONS_00004108	j	XLOC_002191	AGAP005925	AGAP005925-RA	TSS3115	2L:23691105-23741699	2965	-	Res	Sus	OK	5.0914	3.32974	6.85305	1.82724	1.06732	2.58717	-1.02474	3.78833	0.000151661	0.00167545	yes
TCONS_00004131	TCONS_00004131	j	XLOC_002205	AGAP005945	AGAP005945-RA	TSS3133	2L:23887153-23974728	1097	-	Res	Sus	OK	0	0	0	4.37702	2.45261	6.30143	1.79769e+308	1.79769e+308	2.69569e-06	5.43859e-05	yes
TCONS_00004139	TCONS_00004139	j	XLOC_002210	AGAP005954	AGAP005954-RA	TSS3142	2L:24035216-24044115	2776	-	Res	Sus	OK	1.90477	1.10239	2.70715	0.198999	0.0106175	0.387381	-2.25882	4.36006	1.30029e-05	0.000210003	yes
TCONS_00004147	TCONS_00004147	j	XLOC_002215	AGAP005963	AGAP005963-RB	TSS3152	2L:24097198-24106657	5323	-	Res	Sus	OK	3.65617	2.43516	4.87718	0.962262	0.564043	1.36048	-1.33488	5.02045	5.15499e-07	1.25874e-05	yes
TCONS_00004151	TCONS_00004151	j	XLOC_002216	AGAP005964	AGAP005964-RB	TSS3158	2L:24107317-24320310	2945	-	Res	Sus	OK	0.834826	0.392795	1.27686	0	0	0	-1.79769e+308	-1.79769e+308	7.92912e-05	0.00097698	yes
TCONS_00004152	TCONS_00004152	j	XLOC_002216	AGAP005964	AGAP005964-RB	TSS3156	2L:24107317-24320310	3673	-	Res	Sus	OK	0	0	0	0.882756	0.470686	1.29483	1.79769e+308	1.79769e+308	9.15763e-06	0.000156009	yes
TCONS_00004153	TCONS_00004153	j	XLOC_002216	AGAP005964	AGAP005964-RB	TSS3156	2L:24107317-24320310	3661	-	Res	Sus	OK	0.899856	0.463666	1.33605	2.5737	1.63944	3.50795	1.05086	-3.47056	0.000519377	0.00457872	yes
TCONS_00004160	TCONS_00004160	j	XLOC_002220	AGAP005971	AGAP005971-RA	TSS3165	2L:24320897-24332805	3875	-	Res	Sus	OK	1.82391	1.09775	2.55006	0.375091	0.141107	0.609075	-1.58157	4.27434	1.91708e-05	0.000293197	yes
TCONS_00004192	TCONS_00004192	j	XLOC_002246	AGAP006018	AGAP006018-RB	TSS3200	2L:24711234-24845767	2031	-	Res	Sus	OK	0.805951	0.303592	1.30831	0.071627	0	0.191684	-2.42055	2.70712	0.00678692	0.0330712	yes
TCONS_00004205	TCONS_00004205	j	XLOC_002253	AGAP006026	AGAP006026-RA	TSS3214	2L:25174688-25195703	2261	-	Res	Sus	OK	0	0	0	1.44998	0.751538	2.14843	1.79769e+308	1.79769e+308	1.64765e-05	0.000257069	yes
TCONS_00004240	TCONS_00004240	j	XLOC_002271	AGAP006059	AGAP006059-RA	TSS3246	2L:25800656-25898883	2555	-	Res	Sus	OK	1.38198	0.730348	2.03361	0.292791	0.0486959	0.536886	-1.55182	3.24041	0.00119358	0.00897024	yes
TCONS_00004246	TCONS_00004246	j	XLOC_002275	AGAP006068	AGAP006068-RC	TSS3250	2L:25980197-25997941	3985	-	Res	Sus	OK	8.20629	5.57161	10.841	2.37963	1.52601	3.23326	-1.23796	5.14301	2.70377e-07	7.13509e-06	yes
TCONS_00004253	TCONS_00004253	j	XLOC_002277	AGAP006072	AGAP006072-RA	TSS3255	2L:26055401-26062518	1529	-	Res	Sus	OK	2.20279	1.15538	3.25021	0.212297	0	0.473332	-2.33949	3.54923	0.000386355	0.00362705	yes
TCONS_00004279	TCONS_00004279	j	XLOC_002298	AGAP006121	AGAP006121-RA	TSS3281	2L:26996606-27006017	1788	-	Res	Sus	OK	0.912023	0.375829	1.44822	3.34134	2.03316	4.64953	1.29846	-3.67654	0.000236419	0.00241862	yes
TCONS_00004280	TCONS_00004280	j	XLOC_002298	AGAP006121	AGAP006121-RA	TSS3281	2L:26996606-27006017	1804	-	Res	Sus	OK	9.52666	6.3373	12.716	3.5983	2.21411	4.98248	-0.973633	3.81849	0.00013427	0.00151248	yes
TCONS_00004293	TCONS_00004293	j	XLOC_002304	AGAP006133	AGAP006133-RA	TSS3293	2L:27047672-27070111	9887	-	Res	Sus	OK	1.97194	1.31362	2.63026	0.0875081	0.0202289	0.154787	-3.11504	7.43282	1.06359e-13	1.21578e-11	yes
TCONS_00004294	TCONS_00004294	j	XLOC_002304	AGAP006133	AGAP006133-RA	TSS3294	2L:27047672-27070111	8124	-	Res	Sus	OK	1.25138	0.798084	1.70467	0.159738	0.0601001	0.259377	-2.05846	5.70755	1.14611e-08	4.42042e-07	yes
TCONS_00004310	TCONS_00004310	j	XLOC_002314	CPLCX3	AGAP006149-RA	TSS3309	2L:27173061-27174209	901	-	Res	Sus	OK	4.46351	2.29448	6.63254	0.370972	0	0.876264	-2.48756	3.44022	0.000581241	0.00501096	yes
TCONS_00004334	TCONS_00004334	j	XLOC_002330	AGAP006183	AGAP006183-RA	TSS3334	2L:27821155-27852773	5555	-	Res	Sus	OK	12.5841	8.68268	16.4856	4.83478	3.27178	6.39778	-0.9566	4.27134	1.94305e-05	0.000296347	yes
TCONS_00004337	TCONS_00004337	j	XLOC_002331	AGAP006185	AGAP006185-RA	TSS3337	2L:27872529-27881968	2085	-	Res	Sus	OK	0.798366	0.285225	1.31151	0.09022	0	0.233647	-2.18032	2.543	0.0109906	0.0458876	yes
TCONS_00004339	TCONS_00004339	j	XLOC_002332	AGAP006188	AGAP006188-RB	TSS3339	2L:27934193-28207729	6303	-	Res	Sus	OK	0.410738	0.199297	0.622179	0	0	0	-1.79769e+308	-1.79769e+308	5.11387e-05	0.000681484	yes
TCONS_00004342	TCONS_00004342	j	XLOC_002332	AGAP006188	AGAP006188-RB	TSS3339	2L:27934193-28207729	3288	-	Res	Sus	OK	0.392554	0.130655	0.654454	0	0	0	-1.79769e+308	-1.79769e+308	0.00135991	0.0100005	yes
TCONS_00004345	TCONS_00004345	j	XLOC_002332	AGAP006190	AGAP006190-RA	TSS3344	2L:27934193-28207729	931	-	Res	Sus	OK	0.546932	0	1.1248	3.7512	2.03384	5.46855	1.92551	-3.34437	0.000824684	0.00667783	yes
TCONS_00004346	TCONS_00004346	j	XLOC_002334	AGAP006192	AGAP006192-RA	TSS3345	2L:28208922-28211836	2030	-	Res	Sus	OK	3.48594	2.09854	4.87334	9.14488	6.10269	12.1871	0.964456	-3.71861	0.000200322	0.0021095	yes
TCONS_00004362	TCONS_00004362	j	XLOC_002348	AGAP006212	AGAP006212-RA	TSS3361	2L:28322905-28400870	2579	-	Res	Sus	OK	7.08801	4.73026	9.44575	1.04245	0.5469	1.53799	-1.91683	6.60757	3.90687e-11	2.75813e-09	yes
TCONS_00004377	TCONS_00004377	j	XLOC_002353	GPRMTH4	AGAP006218-RA	TSS3370	2L:28474000-28490897	2415	-	Res	Sus	OK	0.840515	0.351974	1.32906	3.66531	2.29602	5.0346	1.47265	-4.26274	2.0194e-05	0.000306614	yes
TCONS_00004416	TCONS_00004416	j	XLOC_002378	AGAP006269	AGAP006269-RA	TSS3405	2L:28923091-28927176	3926	-	Res	Sus	OK	5.77431	3.85147	7.69714	1.98758	1.21238	2.76279	-1.0665	4.15916	3.19417e-05	0.000455221	yes
TCONS_00004417	TCONS_00004417	j	XLOC_002378	AGAP006269	AGAP006269-RA	TSS3405	2L:28923091-28927176	3806	-	Res	Sus	OK	1.84093	1.08073	2.60113	4.58704	3.02063	6.15344	0.912963	-3.40754	0.000655522	0.00551977	yes
TCONS_00004419	TCONS_00004419	j	XLOC_002379	AGAP006270	AGAP006270-RA	TSS3409	2L:28927661-29015756	1943	-	Res	Sus	OK	1.89285	1.02861	2.75709	0.208141	0	0.434558	-2.20762	3.74255	0.000182159	0.0019532	yes
TCONS_00004473	TCONS_00004473	j	XLOC_002428	AGAP006339	AGAP006339-RA	TSS3422	2L:29778487-29904894	6165	-	Res	Sus	OK	0.990053	0.590177	1.38993	0.0641963	0	0.135038	-2.73581	4.65626	3.22013e-06	6.35144e-05	yes
TCONS_00004475	TCONS_00004475	j	XLOC_002428	AGAP006339	AGAP006339-RA	TSS3423	2L:29778487-29904894	4445	-	Res	Sus	OK	0.659085	0.340555	0.977615	0.0914004	0	0.188784	-1.9756	3.37725	0.000732148	0.00604502	yes
TCONS_00004482	TCONS_00004482	j	XLOC_002433	AGAP006347	AGAP006347-RB	TSS3428	2L:30172541-30340529	3772	-	Res	Sus	OK	2.97577	1.92401	4.02754	0	0	0	-1.79769e+308	-1.79769e+308	7.62889e-09	3.06287e-07	yes
TCONS_00004483	TCONS_00004483	j	XLOC_002433	AGAP006347	AGAP006347-RB	TSS3429	2L:30172541-30340529	5915	-	Res	Sus	OK	0.7048	0.391009	1.01859	1.5986	1.02804	2.16915	0.818967	-2.87046	0.00409873	0.023156	yes
TCONS_00004504	TCONS_00004504	j	XLOC_002442	AGAP006373	AGAP006373-RA	TSS3442	2L:30565902-30573614	3972	-	Res	Sus	OK	6.25604	4.22429	8.28779	3.23629	2.13624	4.33634	-0.659119	2.80405	0.00504647	0.0269636	yes
TCONS_00004506	TCONS_00004506	j	XLOC_002442	AGAP006373	AGAP006373-RA	TSS3442	2L:30565902-30573614	2537	-	Res	Sus	OK	7.5268	5.00822	10.0454	2.26445	1.35094	3.17795	-1.20114	4.58339	4.57503e-06	8.59727e-05	yes
TCONS_00004508	TCONS_00004508	j	XLOC_002444	AGAP006380	AGAP006380-RA	TSS3445	2L:30879450-30957382	5492	-	Res	Sus	OK	42.0497	28.7878	55.3115	10.9686	7.56262	14.3745	-1.34382	6.07245	1.25973e-09	6.30194e-08	yes
TCONS_00004528	TCONS_00004528	j	XLOC_002460	AGAP006413	AGAP006413-RA	TSS3461	2L:31604094-31607302	2176	-	Res	Sus	OK	2.89615	1.69364	4.09866	0	0	0	-1.79769e+308	-1.79769e+308	7.29292e-07	1.7217e-05	yes
TCONS_00004531	TCONS_00004531	j	XLOC_002461	AGAP006414	AGAP006414-RA	TSS3462	2L:31609180-31611362	1859	-	Res	Sus	OK	20.0695	13.6587	26.4802	9.00414	5.97281	12.0355	-0.801515	3.45417	0.000551982	0.00480282	yes
TCONS_00004532	TCONS_00004532	j	XLOC_002462	AGAP006415	AGAP006415-RA	TSS3463	2L:31617985-31652568	1019	-	Res	Sus	OK	1.15404	0.299706	2.00836	0	0	0	-1.79769e+308	-1.79769e+308	0.00345016	0.0204063	yes
TCONS_00004540	TCONS_00004540	j	XLOC_002469	AGAP006427	AGAP006427-RB	TSS3473	2L:31735732-31752410	4901	-	Res	Sus	OK	6.13802	4.15901	8.11702	2.25888	1.46293	3.05483	-0.999632	4.18595	2.83978e-05	0.000411494	yes
TCONS_00004557	TCONS_00004557	j	XLOC_002480	AGAP006445	AGAP006445-RA	TSS3488	2L:32191740-32194265	2197	-	Res	Sus	OK	8.45115	5.58868	11.3136	4.28169	2.69499	5.8684	-0.679953	2.70872	0.00675439	0.032949	yes
TCONS_00004575	TCONS_00004575	j	XLOC_002491	AGAP006475	AGAP006475-RA	TSS3506	2L:32679319-32695490	4477	-	Res	Sus	OK	2.52644	1.61042	3.44247	0	0	0	-1.79769e+308	-1.79769e+308	1.7332e-08	6.36753e-07	yes
TCONS_00004576	TCONS_00004576	j	XLOC_002491	AGAP006475	AGAP006475-RA	TSS3507	2L:32679319-32695490	6672	-	Res	Sus	OK	2.92034	1.93892	3.90176	1.27905	0.801703	1.7564	-0.82558	3.28775	0.00100993	0.00787576	yes
TCONS_00004577	TCONS_00004577	j	XLOC_002491	AGAP006475	AGAP006475-RA	TSS3508	2L:32679319-32695490	8807	-	Res	Sus	OK	1.9519	1.28538	2.61842	0.143865	0.0478727	0.239856	-2.60768	6.9581	3.44902e-12	3.01947e-10	yes
TCONS_00004611	TCONS_00004611	j	XLOC_002518	AGAP006513	AGAP006513-RA	TSS3533	2L:33292938-33348295	6222	-	Res	Sus	OK	3.91899	2.63127	5.20671	2.07292	1.35423	2.79161	-0.636876	2.66658	0.00766285	0.0359575	yes
TCONS_00004653	TCONS_00004653	j	XLOC_002550	AGAP006571	AGAP006571-RA	TSS3572	2L:34170499-34202923	2453	-	Res	Sus	OK	1.40789	0.735769	2.08001	0.10193	0	0.2406	-2.62556	3.64213	0.000270397	0.00270415	yes
TCONS_00004660	TCONS_00004660	j	XLOC_002553	AGAP006576	AGAP006576-RC	TSS3577	2L:34221212-34225311	1696	-	Res	Sus	OK	4.33154	2.61842	6.04465	1.84201	0.952102	2.73191	-0.855066	2.73903	0.00616207	0.0310411	yes
TCONS_00004681	TCONS_00004681	j	XLOC_002565	AGAP006590	AGAP006590-RA	TSS3593	2L:34282902-34407510	11641	-	Res	Sus	OK	8.39978	5.80641	10.9932	3.92325	2.69699	5.14951	-0.761285	3.4656	0.000529041	0.00463796	yes
TCONS_00004689	TCONS_00004689	j	XLOC_002567	AGAP006592	AGAP006592-RA	TSS3601	2L:34425733-34441055	7060	-	Res	Sus	OK	1.12839	0.710225	1.54656	0.128071	0.0394681	0.216675	-2.17596	5.54504	2.93884e-08	1.01068e-06	yes
TCONS_00004691	TCONS_00004691	j	XLOC_002567	AGAP006592	AGAP006592-RA	TSS3603	2L:34425733-34441055	1910	-	Res	Sus	OK	4.412	2.73406	6.08994	1.23826	0.595369	1.88114	-1.27062	3.94862	7.8602e-05	0.000972562	yes
TCONS_00004710	TCONS_00004710	j	XLOC_002581	AGAP006623	AGAP006623-RA	TSS3617	2L:34764279-34767220	1760	-	Res	Sus	OK	1.34539	0.61466	2.07611	0.148742	0	0.353807	-2.20223	2.97238	0.00295505	0.0182027	yes
TCONS_00004715	TCONS_00004715	j	XLOC_002584	SCRASP2	AGAP006631-RA	TSS3621	2L:34801715-34809561	5081	-	Res	Sus	OK	0.657994	0.338051	0.977936	0.156868	0.0263109	0.287426	-1.43379	2.97496	0.00293022	0.0180876	yes
TCONS_00004719	TCONS_00004719	j	XLOC_002586	AGAP006634	AGAP006634-RA	TSS3628	2L:34920604-35194216	2492	-	Res	Sus	OK	2.65246	1.59158	3.71335	0.765893	0.345964	1.18582	-1.2422	3.66071	0.000251517	0.00254476	yes
TCONS_00004737	TCONS_00004737	j	XLOC_002599	AGAP006656	AGAP006656-RA	TSS3643	2L:35818396-36415221	2402	-	Res	Sus	OK	4.1694	2.62114	5.71766	0.694238	0.28058	1.10789	-1.79271	5.10683	3.27605e-07	8.45812e-06	yes
TCONS_00004793	TCONS_00004793	j	XLOC_002638	AGAP006721	AGAP006721-RB	TSS3698	2L:37168480-37246064	2457	-	Res	Sus	OK	1.44307	0.748562	2.13758	0.268722	0.0202086	0.517236	-1.68085	3.22455	0.00126169	0.00939257	yes
TCONS_00004800	TCONS_00004800	j	XLOC_002641	COEAE3H	AGAP006725-RA	TSS3704	2L:37288437-37295468	1985	-	Res	Sus	OK	4.12408	2.55142	5.69674	1.33433	0.669683	1.99898	-1.12841	3.59755	0.000321231	0.00312058	yes
TCONS_00004805	TCONS_00004805	j	XLOC_002644	AGAP006730	AGAP006730-RA	TSS3710	2L:37301684-37306159	2454	-	Res	Sus	OK	1.78062	0.988535	2.57271	0.716832	0.312183	1.12148	-0.909878	2.53199	0.0113416	0.0468739	yes
TCONS_00004807	TCONS_00004807	j	XLOC_002644	AGAP006730	AGAP006730-RA	TSS3712	2L:37301684-37306159	1507	-	Res	Sus	OK	2.48991	1.34132	3.6385	0.910821	0.340115	1.48153	-1.00566	2.58498	0.00973853	0.0425355	yes
TCONS_00004818	TCONS_00004818	j	XLOC_002650	AGAP006741	AGAP006741-RA	TSS3719	2L:37673261-37701160	5616	-	Res	Sus	OK	1.93569	1.23581	2.63557	3.59345	2.40973	4.77716	0.618649	-2.52962	0.0114186	0.0471347	yes
TCONS_00004824	TCONS_00004824	j	XLOC_002653	AGAP006754	AGAP006754-RA	TSS3726	2L:37748959-37873685	6113	-	Res	Sus	OK	5.23794	3.55948	6.91639	1.57364	1.01035	2.13692	-1.20254	5.0061	5.55444e-07	1.3429e-05	yes
TCONS_00004829	TCONS_00004829	j	XLOC_002655	AGAP006756	AGAP006756-RA	TSS3732	2L:37882051-37888595	3331	-	Res	Sus	OK	22.0693	15.2276	28.9111	4.75884	3.17121	6.34647	-1.53419	6.73744	1.61202e-11	1.24131e-09	yes
TCONS_00004870	TCONS_00004870	j	XLOC_002687	AGAP006812	AGAP006812-RA	TSS3768	2L:38714115-38858249	5623	-	Res	Sus	OK	4.15287	2.7984	5.50733	0.477114	0.250428	0.7038	-2.1638	7.50938	5.9508e-14	7.0964e-12	yes
TCONS_00004871	TCONS_00004871	j	XLOC_002687	AGAP006812	AGAP006812-RA	TSS3769	2L:38714115-38858249	5826	-	Res	Sus	OK	3.81035	2.56419	5.05652	0.552136	0.302984	0.801288	-1.93168	6.93225	4.14202e-12	3.5835e-10	yes
TCONS_00004876	TCONS_00004876	j	XLOC_002689	AGAP006817	AGAP006817-RA	TSS3777	2L:38861480-38867061	4349	-	Res	Sus	OK	4.0104	2.66855	5.35224	0.609496	0.314811	0.904181	-1.88401	6.40848	1.46975e-10	9.1209e-09	yes
TCONS_00004878	TCONS_00004878	j	XLOC_002690	AGAP006824	AGAP006824-RA	TSS3778	2L:38955369-38964199	1187	-	Res	Sus	OK	7.74888	4.82526	10.6725	2.13375	1.03998	3.22751	-1.28967	4.05247	5.06801e-05	0.000676598	yes
TCONS_00004900	TCONS_00004900	j	XLOC_002712	AGAP006873	AGAP006873-RA	TSS3796	2L:39300238-39307966	2140	-	Res	Sus	OK	1.48787	0.780616	2.19512	0.471792	0.147956	0.795627	-1.14856	2.75131	0.00593569	0.0301868	yes
TCONS_00004916	TCONS_00004916	j	XLOC_002723	AGAP006901	AGAP006901-RC	TSS3812	2L:39704044-39750797	2133	-	Res	Sus	OK	14.0091	9.47952	18.5387	31.3026	21.5962	41.0091	0.803993	-3.58933	0.000331535	0.00319745	yes
TCONS_00004923	TCONS_00004923	j	XLOC_002724	AGAP006908	AGAP006908-RA	TSS3816	2L:39869645-39924073	644	-	Res	Sus	OK	1.57605	0.285499	2.8666	0	0	0	-1.79769e+308	-1.79769e+308	0.00729406	0.0348496	yes
TCONS_00004924	TCONS_00004924	j	XLOC_002724	AGAP006908	AGAP006908-RA	TSS3817	2L:39869645-39924073	1174	-	Res	Sus	OK	2.37056	1.12243	3.61869	0	0	0	-1.79769e+308	-1.79769e+308	7.27658e-05	0.000911339	yes
TCONS_00004943	TCONS_00004943	j	XLOC_002738	AGAP006932	AGAP006932-RA	TSS3832	2L:40113354-40120930	2692	-	Res	Sus	OK	1.14751	0.618154	1.67687	0.367815	0.128871	0.606759	-1.13777	2.85599	0.00429023	0.0239739	yes
TCONS_00004945	TCONS_00004945	j	XLOC_002740	AGAP006935	AGAP006935-RC	TSS3835	2L:40141002-40156760	7696	-	Res	Sus	OK	1.0348	0.656349	1.41324	0	0	0	-1.79769e+308	-1.79769e+308	2.26749e-08	8.03601e-07	yes
TCONS_00004970	TCONS_00004970	j	XLOC_002754	AGAP006963	AGAP006963-RA	TSS3856	2L:40272228-40278923	3073	-	Res	Sus	OK	1.91741	1.09977	2.73505	0.374607	0.103302	0.645913	-1.63285	3.88564	0.000102062	0.00120023	yes
TCONS_00004998	TCONS_00004998	j	XLOC_002773	AGAP006992	AGAP006992-RA	TSS3881	2L:40500483-40508388	3353	-	Res	Sus	OK	0.941306	0.464744	1.41787	0	0	0	-1.79769e+308	-1.79769e+308	3.90092e-05	0.000539223	yes
TCONS_00005006	TCONS_00005006	j	XLOC_002779	AGAP007003	AGAP007003-RA	TSS3893	2L:40592224-40593930	1490	-	Res	Sus	OK	9.61794	6.3314	12.9045	5.00706	3.12457	6.88954	-0.652782	2.56974	0.0101773	0.0439131	yes
TCONS_00005007	TCONS_00005007	j	XLOC_002780	AGAP007006	AGAP007006-RC	TSS3896	2L:40730308-40772078	9501	-	Res	Sus	OK	7.56744	5.21924	9.91563	4.19421	2.86987	5.51855	-0.590149	2.6661	0.00767365	0.0360005	yes
TCONS_00005017	TCONS_00005017	j	XLOC_002783	AGAP007012	AGAP007012-RA	TSS3908	2L:40900501-40973291	1956	-	Res	Sus	OK	3.2496	1.92047	4.57873	0	0	0	-1.79769e+308	-1.79769e+308	5.04675e-07	1.23779e-05	yes
TCONS_00005020	TCONS_00005020	j	XLOC_002783	AGAP007012	AGAP007012-RA	TSS3909	2L:40900501-40973291	2475	-	Res	Sus	OK	1.57983	0.85431	2.30534	0.42901	0.128418	0.729601	-1.30359	3.11211	0.00185755	0.0127665	yes
TCONS_00005022	TCONS_00005022	j	XLOC_002784	AGAP007018	AGAP007018-RA	TSS3912	2L:40983502-40994094	3854	-	Res	Sus	OK	5.90494	3.97151	7.83837	3.0429	1.98951	4.09629	-0.662979	2.78272	0.00539048	0.0281439	yes
TCONS_00005030	TCONS_00005030	j	XLOC_002789	AGAP007027	AGAP007027-RA	TSS3918	2L:41032912-41043466	2074	-	Res	Sus	OK	2.87036	1.71091	4.0298	0.147759	0	0.329267	-2.96661	4.58833	4.4681e-06	8.42864e-05	yes
TCONS_00005052	TCONS_00005052	j	XLOC_002806	AGAP007051	AGAP007051-RA	TSS3941	2L:41833571-41874573	3346	-	Res	Sus	OK	8.34449	5.62817	11.0608	0.832186	0.419272	1.2451	-2.3053	7.76941	7.99361e-15	1.09876e-12	yes
TCONS_00005053	TCONS_00005053	j	XLOC_002806	AGAP007051	AGAP007051-RA	TSS3941	2L:41833571-41874573	3388	-	Res	Sus	OK	14.449	9.89618	19.0019	1.95651	1.18336	2.72965	-1.99947	7.91221	2.44249e-15	3.70344e-13	yes
TCONS_00005056	TCONS_00005056	j	XLOC_002808	AGAP007054	AGAP007054-RA	TSS3943	2L:41882542-41887644	2924	-	Res	Sus	OK	2.39096	1.42364	3.35828	7.10785	4.74671	9.469	1.08951	-4.16257	3.14692e-05	0.000449503	yes
TCONS_00005060	TCONS_00005060	j	XLOC_002810	AGAP007057	AGAP007057-RA	TSS3948	2L:41904857-41910306	2727	-	Res	Sus	OK	7.30172	4.87189	9.73156	2.73427	1.69947	3.76907	-0.982246	3.89817	9.69211e-05	0.00114804	yes
TCONS_00005093	TCONS_00005093	j	XLOC_002836	AGAP007093	AGAP007093-RA	TSS3985	2L:42465137-42561148	4710	-	Res	Sus	OK	0.321632	0.113811	0.529453	0	0	0	-1.79769e+308	-1.79769e+308	0.000983128	0.00769806	yes
TCONS_00005097	TCONS_00005097	j	XLOC_002838	AGAP007096	AGAP007096-RA	TSS3988	2L:42576836-42578610	1487	-	Res	Sus	OK	4.78678	2.86463	6.70894	0.326234	0	0.677386	-2.686	4.676	2.92525e-06	5.83767e-05	yes
TCONS_00005100	TCONS_00005100	j	XLOC_002841	AGAP007106	AGAP007106-RA	TSS3992	2L:42799212-42817652	6146	-	Res	Sus	OK	9.68246	6.65947	12.7055	5.10274	3.47191	6.73358	-0.640538	2.86729	0.00413998	0.0233323	yes
TCONS_00005102	TCONS_00005102	j	XLOC_002841	AGAP007106	AGAP007106-RA	TSS3995	2L:42799212-42817652	5714	-	Res	Sus	OK	5.30842	3.59703	7.0198	1.71439	1.09428	2.3345	-1.13024	4.66529	3.08183e-06	6.10322e-05	yes
TCONS_00005107	TCONS_00005107	j	XLOC_002844	AGAP007114	AGAP007114-RA	TSS4000	2L:42970804-43019280	5579	-	Res	Sus	OK	1.48389	0.912382	2.0554	0.289921	0.11576	0.464081	-1.63282	4.57641	4.73021e-06	8.82872e-05	yes
TCONS_00005112	TCONS_00005112	j	XLOC_002846	AGAP007119	AGAP007119-RA	TSS4003	2L:43040488-43043142	1490	-	Res	Sus	OK	8.18307	5.22859	11.1375	2.01845	1.0174	3.01949	-1.39974	4.56349	5.03095e-06	9.31517e-05	yes
TCONS_00005123	TCONS_00005123	j	XLOC_002851	AGAP007135	AGAP007135-RA	TSS4016	2L:43341358-43386559	1111	-	Res	Sus	OK	11.0492	7.10573	14.9927	4.79554	2.79105	6.80002	-0.834672	3.03721	0.00238777	0.0154685	yes
TCONS_00005124	TCONS_00005124	j	XLOC_002851	AGAP007135	AGAP007135-RA	TSS4019	2L:43341358-43386559	4804	-	Res	Sus	OK	0	0	0	0.333049	0.133944	0.532154	1.79769e+308	1.79769e+308	0.000410733	0.0038057	yes
TCONS_00005126	TCONS_00005126	j	XLOC_002851	AGAP007135	AGAP007135-RA	TSS4019	2L:43341358-43386559	5420	-	Res	Sus	OK	5.33249	3.60243	7.06254	1.5411	0.961832	2.12036	-1.24132	4.99996	5.7341e-07	1.38255e-05	yes
TCONS_00005148	TCONS_00005148	j	XLOC_002865	AGAP007163	AGAP007163-RB	TSS4038	2L:43615324-43707631	6534	-	Res	Sus	OK	2.62537	1.72959	3.52116	0.297175	0.130866	0.463484	-2.17866	6.64786	2.97375e-11	2.15808e-09	yes
TCONS_00005149	TCONS_00005149	j	XLOC_002865	AGAP007163	AGAP007163-RB	TSS4039	2L:43615324-43707631	6769	-	Res	Sus	OK	3.34876	2.23963	4.45788	0.340078	0.160266	0.519891	-2.28717	7.33176	2.27152e-13	2.45652e-11	yes
TCONS_00005177	TCONS_00005177	j	XLOC_002881	AGAP007198	AGAP007198-RB	TSS4054	2L:44193172-44264528	5421	-	Res	Sus	OK	1.10124	0.655734	1.54675	0.115959	0.0133041	0.218615	-2.25096	4.62528	3.74086e-06	7.21407e-05	yes
TCONS_00005224	TCONS_00005224	j	XLOC_002915	AGAP007253	AGAP007253-RB	TSS4076	2L:44665739-44695102	5015	-	Res	Sus	OK	10.1663	6.97481	13.3578	1.42236	0.869821	1.9749	-1.96676	7.87559	3.33067e-15	4.94812e-13	yes
TCONS_00005246	TCONS_00005246	j	XLOC_002933	AGAP007290	AGAP007290-RA	TSS4097	2L:45011202-45016266	1807	-	Res	Sus	OK	1.79313	0.916973	2.66929	0.15439	0	0.359001	-2.45224	3.47222	0.000516168	0.0045568	yes
TCONS_00005247	TCONS_00005247	j	XLOC_002934	IAP7	AGAP007293-RA	TSS4099	2L:45017876-45034491	1973	-	Res	Sus	OK	6.92288	4.505	9.34076	2.71393	1.59643	3.83143	-0.936435	3.46868	0.000523031	0.00459806	yes
TCONS_00005253	TCONS_00005253	j	XLOC_002936	IAP1	AGAP007294-RA	TSS4104	2L:45036357-45062613	3646	-	Res	Sus	OK	17.6775	12.1429	23.2121	2.70376	1.7192	3.68832	-1.87765	7.81973	5.32907e-15	7.63424e-13	yes
TCONS_00005263	TCONS_00005263	j	XLOC_002942	AGAP007303	AGAP007303-RA	TSS4111	2L:45099532-45127857	918	-	Res	Sus	OK	0.913177	0.129163	1.69719	0	0	0	-1.79769e+308	-1.79769e+308	0.00991649	0.0431079	yes
TCONS_00005268	TCONS_00005268	j	XLOC_002946	AGAP007308	AGAP007308-RA	TSS4115	2L:45166996-45252700	3599	-	Res	Sus	OK	7.27085	4.89355	9.64815	0.520136	0.226534	0.813739	-2.63754	8.08652	6.66134e-16	1.14365e-13	yes
TCONS_00005269	TCONS_00005269	j	XLOC_002946	AGAP007308	AGAP007308-RA	TSS4115	2L:45166996-45252700	3344	-	Res	Sus	OK	1.17162	0.630524	1.71273	5.94631	3.98176	7.91086	1.62438	-5.72122	1.05762e-08	4.1151e-07	yes
TCONS_00005291	TCONS_00005291	j	XLOC_002962	AGAP007342	AGAP007342-RA	TSS4132	2L:45906440-45974432	8963	-	Res	Sus	OK	1.68884	1.1022	2.27549	0.165146	0.0610446	0.269247	-2.32497	6.46065	1.04255e-10	6.70563e-09	yes
TCONS_00005292	TCONS_00005292	j	XLOC_002962	AGAP007342	AGAP007342-RA	TSS4133	2L:45906440-45974432	9477	-	Res	Sus	OK	6.83041	4.69237	8.96845	2.66976	1.79982	3.53971	-0.939394	4.15809	3.20925e-05	0.000456927	yes
TCONS_00005293	TCONS_00005293	j	XLOC_002962	AGAP007342	AGAP007342-RA	TSS4133	2L:45906440-45974432	9070	-	Res	Sus	OK	2.26647	1.50873	3.02421	6.39906	4.39509	8.40304	1.03793	-4.53155	5.85529e-06	0.000105882	yes
TCONS_00005300	TCONS_00005300	j	XLOC_002969	AGAP007349	AGAP007349-RA	TSS4143	2L:45991793-45998069	5309	-	Res	Sus	OK	0.700887	0.388231	1.01354	0.0548137	0	0.121299	-2.54841	3.9438	8.02008e-05	0.000986534	yes
TCONS_00005306	TCONS_00005306	j	XLOC_002974	AGAP007362	AGAP007362-RB	TSS4150	2L:46061684-46079319	1762	-	Res	Sus	OK	2.5352	1.44563	3.62477	0	0	0	-1.79769e+308	-1.79769e+308	1.63114e-06	3.48695e-05	yes
TCONS_00005307	TCONS_00005307	j	XLOC_002974	AGAP007362	AGAP007362-RB	TSS4150	2L:46061684-46079319	1586	-	Res	Sus	OK	10.7546	7.12344	14.3858	2.32086	1.27562	3.36609	-1.5334	5.44844	5.08127e-08	1.62937e-06	yes
TCONS_00005315	TCONS_00005315	j	XLOC_002978	AGAP007373	AGAP007373-RB	TSS4158	2L:46135108-46152665	1782	-	Res	Sus	OK	46.1884	31.8565	60.5203	15.4894	10.5144	20.4644	-1.09258	4.89296	9.93323e-07	2.25223e-05	yes
TCONS_00005361	TCONS_00005361	j	XLOC_003008	AGAP007452	AGAP007452-RB	TSS4198	2L:46638576-46673664	3872	-	Res	Sus	OK	1.99379	1.21076	2.77681	0	0	0	-1.79769e+308	-1.79769e+308	1.76659e-07	4.89618e-06	yes
TCONS_00005382	TCONS_00005382	j	XLOC_003022	AGAP007489	AGAP007489-RB	TSS4211	2L:46866897-46898248	2030	-	Res	Sus	OK	2.57676	1.48701	3.6665	0.274316	0.00920643	0.539425	-2.24001	4.24678	2.16869e-05	0.000325363	yes
TCONS_00005386	TCONS_00005386	j	XLOC_003025	CUSOD1	AGAP007497-RA	TSS4214	2L:46920388-46922089	783	-	Res	Sus	OK	2.61843	1.19205	4.04481	8.25873	5.06238	11.4551	1.1487	-3.438	0.000586028	0.00504533	yes
TCONS_00005420	TCONS_00005420	j	XLOC_003046	AGAP007532	AGAP007532-RA	TSS4234	2L:47243841-47256751	5193	-	Res	Sus	OK	12.884	8.86489	16.9031	0.740881	0.413047	1.06872	-2.8559	10.5501	0	0	yes
TCONS_00005445	TCONS_00005445	j	XLOC_003060	AGAP007573	AGAP007573-RA	TSS4251	2L:47769559-47786633	6238	-	Res	Sus	OK	4.08654	2.73004	5.44303	2.21052	1.43639	2.98465	-0.614471	2.54692	0.010868	0.0455954	yes
TCONS_00005458	TCONS_00005458	j	XLOC_003067	AGAP007585	AGAP007585-RA	TSS4259	2L:47835146-47933922	7183	-	Res	Sus	OK	5.67279	3.88779	7.45779	3.11691	2.10902	4.1248	-0.598839	2.65447	0.00794323	0.036877	yes
TCONS_00005459	TCONS_00005459	j	XLOC_003067	AGAP007585	AGAP007585-RA	TSS4261	2L:47835146-47933922	3809	-	Res	Sus	OK	3.37921	2.18754	4.57087	0.292984	0.0914214	0.494548	-2.44528	6.32605	2.51523e-10	1.47973e-08	yes
TCONS_00005464	TCONS_00005464	j	XLOC_003067	AGAP007585	AGAP007585-RA	TSS4264	2L:47835146-47933922	4016	-	Res	Sus	OK	2.00414	1.21709	2.7912	0.776075	0.397013	1.15514	-0.948722	3.02752	0.00246567	0.0158567	yes
TCONS_00005473	TCONS_00005473	j	XLOC_003072	AGAP007592	AGAP007592-RA	TSS4270	2L:48055291-48085574	4796	-	Res	Sus	OK	2.66966	1.73343	3.60588	0.668049	0.357818	0.978281	-1.38534	4.76124	1.92407e-06	4.03496e-05	yes
TCONS_00005475	TCONS_00005475	j	XLOC_003073	AGAP007593	AGAP007593-RB	TSS4272	2L:48086168-48094681	1266	-	Res	Sus	OK	142.05	97.4702	186.629	3.71536	2.11761	5.3131	-3.6437	13.6885	0	0	yes
TCONS_00005479	TCONS_00005479	j	XLOC_003075	AGAP007596	AGAP007596-RA	TSS4277	2L:48099811-48119441	6231	-	Res	Sus	OK	3.21738	2.15434	4.28042	6.37578	4.37346	8.37809	0.68394	-3.00075	0.00269319	0.0169373	yes
TCONS_00005481	TCONS_00005481	j	XLOC_003075	AGAP007596	AGAP007596-RA	TSS4277	2L:48099811-48119441	2677	-	Res	Sus	OK	2.68504	1.65812	3.71197	0.15126	0	0.310728	-2.87645	5.12968	2.90238e-07	7.56867e-06	yes
TCONS_00005483	TCONS_00005483	j	XLOC_003076	AGAP007599	AGAP007599-RA	TSS4278	2L:48133714-48138336	2265	-	Res	Sus	OK	6.13534	4.02596	8.24471	2.94814	1.81419	4.08208	-0.732891	2.84126	0.00449362	0.0247592	yes
TCONS_00005492	TCONS_00005492	j	XLOC_003081	AGAP007607	AGAP007607-RA	TSS4286	2L:48174035-48195927	3024	-	Res	Sus	OK	2.02378	1.17162	2.87593	0.649808	0.278579	1.02104	-1.13604	3.20147	0.00136728	0.0100514	yes
TCONS_00005504	TCONS_00005504	j	XLOC_003087	AGAP007623	AGAP007623-RA	TSS4296	2L:48356751-48380715	9248	-	Res	Sus	OK	6.86783	4.72532	9.01035	1.6988	1.1247	2.27289	-1.39693	6.07464	1.24269e-09	6.22373e-08	yes
TCONS_00005540	TCONS_00005540	j	XLOC_003110	AGAP007674	AGAP007674-RA	TSS4334	2L:48914716-48926149	2561	-	Res	Sus	OK	4.55934	2.93405	6.18462	0.635174	0.269164	1.00118	-1.97103	5.81781	5.96227e-09	2.46093e-07	yes
TCONS_00005541	TCONS_00005541	j	XLOC_003110	AGAP007674	AGAP007674-RA	TSS4332	2L:48914716-48926149	2467	-	Res	Sus	OK	1.34908	0.705112	1.99306	0	0	0	-1.79769e+308	-1.79769e+308	1.39549e-05	0.000223173	yes
TCONS_00005552	TCONS_00005552	j	XLOC_003118	AGAP007686	AGAP007686-RA	TSS4345	2L:49054975-49067857	1248	-	Res	Sus	OK	11.0085	7.12182	14.8951	3.68369	2.05634	5.31105	-1.09475	3.87164	0.000108106	0.00126089	yes
TCONS_00005574	TCONS_00005574	j	XLOC_003123	AGAP007699	AGAP007699-RA	TSS4358	2L:49132061-49135070	1460	-	Res	Sus	OK	38.6373	26.5769	50.6977	0	0	0	-1.79769e+308	-1.79769e+308	7.40563e-11	4.90629e-09	yes
TCONS_00005580	TCONS_00005580	j	XLOC_003129	AGAP007708	AGAP007708-RA	TSS4365	2L:49150989-49177744	1762	-	Res	Sus	OK	0.533118	0.107292	0.958944	0	0	0	-1.79769e+308	-1.79769e+308	0.00614122	0.0309502	yes
TCONS_00005582	TCONS_00005582	j	XLOC_003129	AGAP007709	AGAP007709-RA	TSS4367	2L:49150989-49177744	3730	-	Res	Sus	OK	0.42662	0.159541	0.6937	2.89923	1.87148	3.92699	1.91631	-5.32726	9.97032e-08	2.96043e-06	yes
TCONS_00005583	TCONS_00005583	j	XLOC_003129	AGAP007709	AGAP007709-RA	TSS4368	2L:49150989-49177744	4592	-	Res	Sus	OK	4.32561	2.88047	5.77076	1.51622	0.929658	2.10278	-1.04833	4.10186	4.0984e-05	0.00056352	yes
TCONS_00005586	TCONS_00005586	j	XLOC_003129	AGAP007709	AGAP007709-RA	TSS4372	2L:49150989-49177744	2675	-	Res	Sus	OK	1.78174	0.997382	2.56609	0	0	0	-1.79769e+308	-1.79769e+308	2.77048e-06	5.57165e-05	yes
TCONS_00005590	TCONS_00005590	j	XLOC_003132	AGAP007715	AGAP007715-RA	TSS4376	2L:49200862-49210724	4869	-	Res	Sus	OK	1.93023	1.19492	2.66554	0	0	0	-1.79769e+308	-1.79769e+308	7.60143e-08	2.31309e-06	yes
TCONS_00005591	TCONS_00005591	j	XLOC_003132	AGAP007716	AGAP007716-RA	TSS4376	2L:49200862-49210724	4848	-	Res	Sus	OK	1.53984	0.922746	2.15694	0.133963	0.00632103	0.261605	-2.44187	4.7247	2.30456e-06	4.74052e-05	yes
TCONS_00005595	TCONS_00005595	j	XLOC_003132	AGAP007715	AGAP007715-RA	TSS4378	2L:49200862-49210724	1548	-	Res	Sus	OK	3.31685	1.86349	4.7702	0.285385	0	0.607137	-2.45293	4.05582	4.99584e-05	0.000668177	yes
TCONS_00005596	TCONS_00005596	j	XLOC_003133	AGAP007717	AGAP007717-RA	TSS4382	2L:49211357-49234978	2454	-	Res	Sus	OK	30.2782	20.8836	39.6729	64.6281	44.443	84.8133	0.758221	-3.4445	0.000572123	0.00494492	yes
TCONS_00005598	TCONS_00005598	j	XLOC_003133	AGAP007717	AGAP007717-RA	TSS4383	2L:49211357-49234978	4037	-	Res	Sus	OK	14.1809	9.75099	18.6107	37.8608	25.9903	49.7313	0.982023	-4.43764	9.09512e-06	0.000155243	yes
TCONS_00005604	TCONS_00005604	j	XLOC_003136	AGAP007720	AGAP007720-RA	TSS4391	2L:49267690-49275961	3383	-	Res	Sus	OK	1.3808	0.76358	1.99803	2.84558	1.80536	3.88581	0.723102	-2.50448	0.0122631	0.0497045	yes
TCONS_00005606	TCONS_00005606	j	XLOC_003136	AGAP007720	AGAP007720-RA	TSS4393	2L:49267690-49275961	3894	-	Res	Sus	OK	4.89085	3.24149	6.54021	0.469192	0.201419	0.736964	-2.34411	7.07229	1.52389e-12	1.43672e-10	yes
TCONS_00005608	TCONS_00005608	j	XLOC_003137	AGAP007723	AGAP007723-RA	TSS4398	2L:49279880-49308222	3380	-	Res	Sus	OK	1.65511	0.947959	2.36227	0.426088	0.157018	0.695157	-1.35698	3.55954	0.0003715	0.00351451	yes
TCONS_00005615	TCONS_00005615	j	XLOC_003139	AGAP007728	AGAP007728-RA	TSS4400	2L:49336203-49343400	2583	-	Res	Sus	OK	3.75716	2.35089	5.16343	1.20047	0.623612	1.77733	-1.14095	3.74637	0.00017941	0.00192841	yes
TCONS_00008133	TCONS_00008133	j	XLOC_000003	AGAP004679	AGAP004679-RA	TSS3	2L:207893-210460	1222	-	Res	Sus	OK	1.93195	0.876985	2.98692	4.60626	2.71431	6.49821	0.868884	-2.54323	0.0109833	0.0458657	yes
TCONS_00008135	TCONS_00008135	j	XLOC_000006	AGAP004686	AGAP004686-RB	TSS6	2L:742003-789602	3099	-	Res	Sus	OK	0.490543	0.171947	0.80914	2.73002	1.70953	3.75052	1.71655	-4.58134	4.62008e-06	8.66716e-05	yes
TCONS_00008136	TCONS_00008136	j	XLOC_000006	AGAP004686	AGAP004686-RB	TSS7	2L:742003-789602	3121	-	Res	Sus	OK	0.252499	0.0283807	0.476617	1.07138	0.570135	1.57262	1.4453	-2.88093	0.00396503	0.0225857	yes
TCONS_00008144	TCONS_00008144	j	XLOC_000011	AGAP004692	AGAP004692-RD	TSS15	2L:1411006-1441380	1299	-	Res	Sus	OK	0	0	0	0.567784	0.0666743	1.06889	1.79769e+308	1.79769e+308	0.0117224	0.0480428	yes
TCONS_00008155	TCONS_00008155	j	XLOC_000020	AGAP004701	AGAP004701-RA	TSS31	2L:2074971-2131593	3463	-	Res	Sus	OK	0	0	0	0.46917	0.187813	0.750528	1.79769e+308	1.79769e+308	0.000426427	0.00392229	yes
TCONS_00008161	TCONS_00008161	j	XLOC_000024	AGAP004707	AGAP004707-RC	TSS39	2L:2358143-2441042	5627	-	Res	Sus	OK	0	0	0	0.743258	0.414577	1.07194	1.79769e+308	1.79769e+308	3.05322e-06	6.06288e-05	yes
TCONS_00008168	TCONS_00008168	j	XLOC_000032	AGAP004718	AGAP004718-RA	TSS52	2L:2686890-2719933	2189	-	Res	Sus	OK	0	0	0	0.859178	0.372641	1.34571	1.79769e+308	1.79769e+308	0.000206363	0.00216228	yes
TCONS_00008173	TCONS_00008173	j	XLOC_000034	AGAP004723	AGAP004723-RA	TSS59	2L:2726420-2796481	1086	-	Res	Sus	OK	0	0	0	2.97062	1.62969	4.31156	1.79769e+308	1.79769e+308	4.69707e-06	8.77802e-05	yes
TCONS_00008180	TCONS_00008180	j	XLOC_000049	AGAP004751	AGAP004751-RA	TSS79	2L:3052301-3056716	4119	-	Res	Sus	OK	1.26439	0.718864	1.80992	2.59035	1.66611	3.5146	0.717202	-2.562	0.0104072	0.044647	yes
TCONS_00008184	TCONS_00008184	j	XLOC_000059	AGAP004766	AGAP004766-RA	TSS91	2L:3163009-3180396	6322	-	Res	Sus	OK	0.140109	0.0255385	0.25468	1.54559	0.991463	2.09973	2.40074	-5.3776	7.54852e-08	2.29857e-06	yes
TCONS_00008188	TCONS_00008188	j	XLOC_000061	AGAP004769	AGAP004769-RA	TSS95	2L:3288075-3322501	5709	-	Res	Sus	OK	12.9094	8.89477	16.924	25.014	17.1604	32.8675	0.661481	-2.99372	0.00275601	0.0172536	yes
TCONS_00008199	TCONS_00008199	j	XLOC_000083	AGAP004805	AGAP004805-RB	TSS120	2L:3757338-3778565	5252	-	Res	Sus	OK	0	0	0	0.467649	0.226873	0.708425	1.79769e+308	1.79769e+308	5.12686e-05	0.000683009	yes
TCONS_00008203	TCONS_00008203	j	XLOC_000091	AGAP004827	AGAP004827-RA	TSS130	2L:4103814-4144864	5246	-	Res	Sus	OK	3.3316	2.19376	4.46945	1.47591	0.910117	2.04171	-0.814178	3.17158	0.00151614	0.0108864	yes
TCONS_00008206	TCONS_00008206	j	XLOC_000094	AGAP004833	AGAP004833-RA	TSS136	2L:4233341-4239922	3557	-	Res	Sus	OK	0.206802	0.0181314	0.395473	1.03991	0.568961	1.51085	1.61512	-3.17144	0.00151687	0.0108898	yes
TCONS_00008215	TCONS_00008215	j	XLOC_000111	AGAP004863	AGAP004863-RA	TSS164	2L:4568075-4578933	3823	-	Res	Sus	OK	0.141207	0	0.29402	1.13189	0.629962	1.63382	2.08142	-3.55944	0.000371653	0.00351446	yes
TCONS_00008217	TCONS_00008217	j	XLOC_000111	AGAP004863	AGAP004863-RA	TSS165	2L:4568075-4578933	2052	-	Res	Sus	OK	0	0	0	0.710861	0.261881	1.15984	1.79769e+308	1.79769e+308	0.000771274	0.00630669	yes
TCONS_00008221	TCONS_00008221	j	XLOC_000114	BND7A_ANOGA	AGAP004871-RA	TSS171	2L:4736659-4760812	5249	-	Res	Sus	OK	1.37104	0.837509	1.90457	3.41955	2.28991	4.5492	0.913943	-3.58091	0.000342404	0.0032772	yes
TCONS_00008222	TCONS_00008222	j	XLOC_000114	BND7A_ANOGA	AGAP004871-RA	TSS174	2L:4736659-4760812	4915	-	Res	Sus	OK	1.80048	1.12877	2.47219	0.656309	0.353783	0.958836	-1.00918	3.40357	0.00066511	0.00558878	yes
TCONS_00008225	TCONS_00008225	j	XLOC_000116	AGAP004877	AGAP004877-RB	TSS179	2L:4851652-4866265	3459	-	Res	Sus	OK	29.422	20.3142	38.5298	63.8976	43.7468	84.0484	0.775538	-3.50999	0.000448122	0.00407764	yes
TCONS_00008226	TCONS_00008226	j	XLOC_000116	AGAP004877	AGAP004877-RB	TSS180	2L:4851652-4866265	3121	-	Res	Sus	OK	51.1075	35.2454	66.9695	110.403	74.6625	146.143	0.770204	-3.43481	0.000592972	0.0050912	yes
TCONS_00008227	TCONS_00008227	j	XLOC_000116	AGAP004877	AGAP004877-RB	TSS181	2L:4851652-4866265	1815	-	Res	Sus	OK	6.11311	3.85974	8.36648	1.51621	0.739645	2.29277	-1.39422	4.41889	9.92078e-06	0.000166883	yes
TCONS_00008228	TCONS_00008228	j	XLOC_000117	AGAP004879	AGAP004879-RA	TSS182	2L:4870280-4886314	1447	-	Res	Sus	OK	3.46679	1.90226	5.03133	0.712828	0.152381	1.27328	-1.58174	3.48961	0.000483722	0.00433102	yes
TCONS_00008229	TCONS_00008229	j	XLOC_000119	AGAP004881	AGAP004881-RA	TSS185	2L:4925231-4932906	2578	-	Res	Sus	OK	0.169434	0	0.369841	0.959889	0.463157	1.45662	1.73435	-2.68673	0.00721543	0.0345787	yes
TCONS_00008234	TCONS_00008234	j	XLOC_000125	AGAP004892	AGAP004892-RA	TSS194	2L:5003000-5042392	11207	-	Res	Sus	OK	0.145833	0.0528823	0.238783	2.08878	1.40455	2.77301	2.66188	-7.42891	1.09468e-13	1.24808e-11	yes
TCONS_00008241	TCONS_00008241	j	XLOC_000130	AGAP004902	AGAP004902-RC	TSS203	2L:5671273-5765480	10073	-	Res	Sus	OK	1.47804	0.968784	1.98729	0.631486	0.384163	0.878809	-0.850394	3.26049	0.00111221	0.00850211	yes
TCONS_00008248	TCONS_00008248	j	XLOC_000136	AGAP004912	AGAP004912-RB	TSS210	2L:5826319-5831726	2280	-	Res	Sus	OK	0	0	0	2.23542	1.27582	3.19502	1.79769e+308	1.79769e+308	1.58814e-06	3.4099e-05	yes
TCONS_00008252	TCONS_00008252	j	XLOC_000139	AGAP004915	AGAP004915-RA	TSS214	2L:5918817-5943382	3081	-	Res	Sus	OK	0	0	0	0.845867	0.419097	1.27264	1.79769e+308	1.79769e+308	3.68464e-05	0.000513998	yes
TCONS_00008263	TCONS_00008263	j	XLOC_000155	AGAP004950	AGAP004950-RA	TSS244	2L:6715703-7007174	15909	-	Res	Sus	OK	6.00589	4.14694	7.86484	2.33627	1.59542	3.07712	-0.944185	4.26147	2.03085e-05	0.000307928	yes
TCONS_00008264	TCONS_00008264	j	XLOC_000155	AGAP004950	AGAP004950-RA	TSS245	2L:6715703-7007174	15714	-	Res	Sus	OK	0.726814	0.463447	0.990181	1.73425	1.17449	2.29401	0.869659	-3.58427	0.000338028	0.00324094	yes
TCONS_00008267	TCONS_00008267	j	XLOC_000166	AGAP004970	AGAP004970-RA	TSS263	2L:7321500-7340658	2646	-	Res	Sus	OK	0.170968	0	0.363562	3.3669	2.13161	4.60219	2.98027	-5.03115	4.87555e-07	1.20047e-05	yes
TCONS_00008268	TCONS_00008268	j	XLOC_000166	AGAP004970	AGAP004970-RA	TSS266	2L:7321500-7340658	3116	-	Res	Sus	OK	0.165285	0	0.339117	1.08356	0.590066	1.57706	1.88034	-3.28132	0.00103322	0.00801775	yes
TCONS_00008272	TCONS_00008272	j	XLOC_000182	AGAP005006	AGAP005006-RA	TSS284	2L:7807762-7812066	3883	-	Res	Sus	OK	0.141011	0.00901501	0.273006	1.05876	0.618905	1.49861	2.01602	-3.93708	8.24782e-05	0.00100892	yes
TCONS_00008280	TCONS_00008280	j	XLOC_000204	ITP	AGAP005055-RA	TSS311	2L:8849202-8887660	4257	-	Res	Sus	OK	0.231761	0.0545302	0.408991	1.04131	0.601178	1.48143	1.50253	-3.43927	0.00058329	0.0050247	yes
TCONS_00008282	TCONS_00008282	j	XLOC_000205	AGAP005057	AGAP005057-RA	TSS312	2L:8891510-8912235	6433	-	Res	Sus	OK	2.01759	1.30657	2.72862	0.23165	0.0913311	0.371969	-2.16443	6.17708	6.52964e-10	3.5135e-08	yes
TCONS_00008285	TCONS_00008285	j	XLOC_000205	AGAP005057	AGAP005057-RA	TSS313	2L:8891510-8912235	6358	-	Res	Sus	OK	0	0	0	3.76025	2.53723	4.98327	1.79769e+308	1.79769e+308	3.89581e-10	2.218e-08	yes
TCONS_00008286	TCONS_00008286	j	XLOC_000205	AGAP005057	AGAP005057-RA	TSS315	2L:8891510-8912235	1668	-	Res	Sus	OK	25.8955	17.688	34.1029	12.761	8.56754	16.9544	-0.707675	3.10006	0.00193478	0.0131437	yes
TCONS_00008300	TCONS_00008300	j	XLOC_000225	AGAP005082	AGAP005082-RA	TSS345	2L:9760045-9779988	8635	-	Res	Sus	OK	0.664955	0.386305	0.943605	1.75937	1.1613	2.35744	0.972992	-3.60641	0.000310466	0.00302934	yes
TCONS_00008309	TCONS_00008309	j	XLOC_000233	AGAP005099	AGAP005099-RA	TSS364	2L:10078519-10115198	2662	-	Res	Sus	OK	0.177632	0	0.374342	1.32891	0.721663	1.93616	2.0124	-3.35967	0.00078036	0.00637036	yes
TCONS_00008313	TCONS_00008313	j	XLOC_000235	AGAP005104	AGAP005104-RA	TSS369	2L:10146125-10148400	1716	-	Res	Sus	OK	0.119954	0	0.30059	1.05998	0.4717	1.64826	2.1789	-2.71531	0.00662133	0.0324759	yes
TCONS_00008317	TCONS_00008317	j	XLOC_000238	AGAP005108	AGAP005108-RB	TSS373	2L:10198418-10203577	1520	-	Res	Sus	OK	18.0006	12.1967	23.8046	8.85756	5.84527	11.8699	-0.709135	3.0264	0.00247484	0.0158902	yes
TCONS_00008318	TCONS_00008318	j	XLOC_000238	AGAP005108	AGAP005108-RB	TSS373	2L:10198418-10203577	1543	-	Res	Sus	OK	27.4676	18.8291	36.1062	8.40583	5.53418	11.2775	-1.18408	5.1	3.39645e-07	8.73828e-06	yes
TCONS_00008319	TCONS_00008319	j	XLOC_000240	AGAP013744	AGAP013744-RA	TSS376	2L:10207781-10234005	8301	-	Res	Sus	OK	0.13199	0.0278546	0.236125	1.40758	0.902558	1.91259	2.3669	-5.46179	4.71371e-08	1.52592e-06	yes
TCONS_00008322	TCONS_00008322	j	XLOC_000243	AGAP005121	AGAP005121-RA	TSS383	2L:10251722-10252977	913	-	Res	Sus	OK	3.02717	1.44603	4.60832	9.03522	5.59028	12.4802	1.0935	-3.38192	0.000719809	0.00596211	yes
TCONS_00008323	TCONS_00008323	j	XLOC_000247	AGAP005134	AGAP005134-RA	TSS388	2L:10355193-10358610	2128	-	Res	Sus	OK	279.253	184.658	373.848	608.474	370.642	846.307	0.778836	-3.01158	0.00259893	0.0165234	yes
TCONS_00008324	TCONS_00008324	j	XLOC_000257	AGAP005155	AGAP005155-RA	TSS401	2L:10608649-10646207	6204	-	Res	Sus	OK	0.325585	0.144364	0.506806	3.39373	2.28265	4.5048	2.34406	-7.25999	3.87024e-13	4.0086e-11	yes
TCONS_00008325	TCONS_00008325	j	XLOC_000257	AGAP005155	AGAP005155-RA	TSS402	2L:10608649-10646207	6275	-	Res	Sus	OK	1.49146	0.939978	2.04294	5.51869	3.76983	7.26754	1.30839	-5.37352	7.72139e-08	2.34636e-06	yes
TCONS_00008331	TCONS_00008331	j	XLOC_000269	AGAP005175	AGAP005175-RB	TSS416	2L:11378215-11405182	8551	-	Res	Sus	OK	1.16791	0.741584	1.59423	2.43621	1.6385	3.23392	0.735231	-2.99867	0.00271159	0.0170262	yes
TCONS_00008336	TCONS_00008336	j	XLOC_000274	AGAP005187	AGAP005187-RA	TSS424	2L:12119829-12138428	12952	-	Res	Sus	OK	0.967957	0.62281	1.3131	0.165437	0.0759544	0.254919	-1.7666	5.45378	4.93116e-08	1.58932e-06	yes
TCONS_00008345	TCONS_00008345	j	XLOC_000284	AGAP005216	AGAP005216-RA	TSS437	2L:12409310-12418295	6217	-	Res	Sus	OK	0.123357	0.0161647	0.230549	5.42926	3.70952	7.14901	3.78448	-8.18361	2.22045e-16	4.18687e-14	yes
TCONS_00008348	TCONS_00008348	j	XLOC_000285	AGAP005219	AGAP005219-RA	TSS442	2L:12441286-12493379	5630	-	Res	Sus	OK	1.45001	0.883321	2.01671	0.566403	0.293041	0.839765	-0.940023	3.02734	0.00246719	0.0158619	yes
TCONS_00008349	TCONS_00008349	j	XLOC_000285	AGAP005219	AGAP005219-RA	TSS443	2L:12441286-12493379	637	-	Res	Sus	OK	0	0	0	2.31177	0.922753	3.7008	1.79769e+308	1.79769e+308	0.00043636	0.00399368	yes
TCONS_00008350	TCONS_00008350	j	XLOC_000285	AGAP005219	AGAP005219-RA	TSS443	2L:12441286-12493379	4147	-	Res	Sus	OK	0	0	0	0.423783	0.175786	0.671781	1.79769e+308	1.79769e+308	0.000315834	0.00307425	yes
TCONS_00008352	TCONS_00008352	j	XLOC_000287	AGAP005222	AGAP005222-RB	TSS448	2L:12504544-12517889	3931	-	Res	Sus	OK	0.766766	0.386273	1.14726	3.97441	2.63928	5.30953	1.64545	-5.49174	3.97991e-08	1.31049e-06	yes
TCONS_00008356	TCONS_00008356	j	XLOC_000291	AGAP005238	AGAP005238-RA	TSS457	2L:12704417-12709271	1552	-	Res	Sus	OK	0.814848	0.178354	1.45134	9.33738	6.01027	12.6645	2.43878	-5.68114	1.33802e-08	5.09823e-07	yes
TCONS_00008358	TCONS_00008358	j	XLOC_000294	AGAP005242	AGAP005242-RA	TSS462	2L:12718546-12767586	6489	-	Res	Sus	OK	0.447536	0.209955	0.685117	1.9641	1.26418	2.66401	1.47903	-4.62645	3.71985e-06	7.17984e-05	yes
TCONS_00008364	TCONS_00008364	j	XLOC_000300	AGAP005251	AGAP005251-RA	TSS468	2L:13148743-13196613	5850	-	Res	Sus	OK	3.17172	2.09733	4.24612	1.43462	0.892528	1.97672	-0.793373	3.12677	0.0017674	0.0122596	yes
TCONS_00008369	TCONS_00008369	j	XLOC_000302	AGAP005258	AGAP005258-RA	TSS474	2L:13257558-13338740	13752	-	Res	Sus	OK	0	0	0	0.11207	0.0424037	0.181736	1.79769e+308	1.79769e+308	0.000646921	0.00546194	yes
TCONS_00008380	TCONS_00008380	j	XLOC_000311	AGAP005275	AGAP005275-RA	TSS493	2L:13532518-13544722	3606	-	Res	Sus	OK	0.634527	0.295205	0.97385	2.65556	1.6995	3.61162	1.43153	-4.44118	8.94679e-06	0.000153007	yes
TCONS_00008387	TCONS_00008387	j	XLOC_000316	AGAP005285	AGAP005285-RA	TSS503	2L:13628386-13662478	10318	-	Res	Sus	OK	2.1542	1.44087	2.86752	1.07773	0.695057	1.4604	-0.69256	2.85288	0.00433246	0.0241579	yes
TCONS_00008388	TCONS_00008388	j	XLOC_000316	AGAP005285	AGAP005285-RA	TSS503	2L:13628386-13662478	15229	-	Res	Sus	OK	0.0375578	0	0.0758629	0.406669	0.24514	0.568199	2.38212	-4.35284	1.34388e-05	0.000215936	yes
TCONS_00008396	TCONS_00008396	j	XLOC_000324	AGAP005299	AGAP005299-RA	TSS519	2L:13809178-13812055	1788	-	Res	Sus	OK	0	0	0	0.953409	0.396633	1.51018	1.79769e+308	1.79769e+308	0.00030768	0.00300748	yes
TCONS_00008398	TCONS_00008398	j	XLOC_000328	AGAP005305	AGAP005305-RA	TSS525	2L:13900495-13909600	3583	-	Res	Sus	OK	0.245804	0.0616639	0.429944	1.16235	0.676322	1.64837	1.55366	-3.62189	0.000292461	0.00288106	yes
TCONS_00008410	TCONS_00008410	j	XLOC_000354	AGAP005322	AGAP005322-RB	TSS535	2L:14040904-14052647	9128	-	Res	Sus	OK	0.297892	0.146237	0.449547	0.733738	0.449789	1.01769	0.901421	-2.81922	0.00481408	0.0260117	yes
TCONS_00008413	TCONS_00008413	j	XLOC_000356	AGAP005324	AGAP005324-RA	TSS543	2L:14075294-14100726	3785	-	Res	Sus	OK	11.7876	8.08314	15.492	21.6284	14.9424	28.3144	0.606963	-2.75377	0.00589129	0.0300094	yes
TCONS_00008416	TCONS_00008416	j	XLOC_000357	AGAP005325	AGAP005325-RA	TSS548	2L:14101646-14108886	2125	-	Res	Sus	OK	0.175961	0	0.392518	2.18199	1.24964	3.11433	2.51773	-3.86519	0.000111004	0.0012862	yes
TCONS_00008417	TCONS_00008417	j	XLOC_000360	CTLMA6	AGAP005332-RC	TSS551	2L:14190873-14231738	2325	-	Res	Sus	OK	0.0474795	0	0.135339	0.861872	0.382293	1.34145	2.89881	-3.00033	0.00269689	0.0169557	yes
TCONS_00008426	TCONS_00008426	j	XLOC_000371	AGAP005355	AGAP005355-RA	TSS567	2L:14483333-14544732	2016	-	Res	Sus	OK	0.10102	0	0.255392	3.13882	1.89361	4.38402	3.43628	-4.35308	1.34236e-05	0.000215771	yes
TCONS_00008431	TCONS_00008431	j	XLOC_000378	AGAP005366	AGAP005366-RA	TSS579	2L:14660688-14667901	6333	-	Res	Sus	OK	0.701717	0.397078	1.00636	2.44048	1.62545	3.25551	1.24642	-4.55126	5.33249e-06	9.79131e-05	yes
TCONS_00008440	TCONS_00008440	j	XLOC_000391	AGAP005400	AGAP005400-RB	TSS595	2L:14977800-15076137	2840	-	Res	Sus	OK	0.601471	0.239996	0.962947	2.30235	1.40048	3.20421	1.34231	-3.74227	0.000182363	0.00195396	yes
TCONS_00008443	TCONS_00008443	j	XLOC_000397	AGAP005410	AGAP005410-RB	TSS604	2L:15211341-15213382	1097	-	Res	Sus	OK	0.30785	0	0.687545	2.2269	1.11544	3.33837	1.97876	-2.97437	0.00293592	0.0181126	yes
TCONS_00008449	TCONS_00008449	j	XLOC_000413	AGAP005438	AGAP005438-RA	TSS622	2L:15469591-15472976	3316	-	Res	Sus	OK	0.132406	0	0.276158	0.879368	0.471979	1.28676	1.89333	-3.20795	0.00133683	0.00985546	yes
TCONS_00008456	TCONS_00008456	j	XLOC_000428	AGAP005471	AGAP005471-RA	TSS639	2L:16000528-16067300	13295	-	Res	Sus	OK	0.795634	0.505628	1.08564	0.1506	0.0681877	0.233013	-1.66451	5.0631	4.12489e-07	1.03587e-05	yes
TCONS_00008458	TCONS_00008458	j	XLOC_000436	AGAP005489	AGAP005489-RA	TSS651	2L:16136144-16175099	3786	-	Res	Sus	OK	0.338104	0.112995	0.563214	3.04424	1.98745	4.10104	2.19765	-5.85366	4.80865e-09	2.04012e-07	yes
TCONS_00008459	TCONS_00008459	j	XLOC_000442	AGAP005506	AGAP005506-RA	TSS661	2L:16294743-16354112	15108	-	Res	Sus	OK	4.29469	2.96202	5.62737	1.69136	1.14801	2.23472	-0.931845	4.17263	3.01101e-05	0.000433599	yes
TCONS_00008473	TCONS_00008473	j	XLOC_000467	AGAP005549	AGAP005549-RA	TSS695	2L:16957542-16966306	4701	-	Res	Sus	OK	2.85043	1.84614	3.85472	5.20555	3.50837	6.90272	0.602254	-2.50921	0.0121001	0.0491978	yes
TCONS_00008474	TCONS_00008474	j	XLOC_000469	PGRPLD	AGAP005552-RB	TSS698	2L:16976341-16994592	1745	-	Res	Sus	OK	1.82956	0.925677	2.73344	9.3584	6.19496	12.5218	1.6322	-5.45322	4.94669e-08	1.59316e-06	yes
TCONS_00008478	TCONS_00008478	j	XLOC_000476	AGAP005567	AGAP005567-RB	TSS709	2L:17309026-17317709	5038	-	Res	Sus	OK	0	0	0	1.77351	1.12193	2.42508	1.79769e+308	1.79769e+308	2.60867e-08	9.04892e-07	yes
TCONS_00008480	TCONS_00008480	j	XLOC_000482	AGAP005583	AGAP005583-RB	TSS714	2L:17406555-17420775	12759	-	Res	Sus	OK	2.69108	1.83478	3.54737	5.58312	3.85115	7.31509	0.729807	-3.28452	0.00102156	0.00795663	yes
TCONS_00008481	TCONS_00008481	j	XLOC_000482	AGAP005583	AGAP005583-RB	TSS715	2L:17406555-17420775	12690	-	Res	Sus	OK	9.13442	6.30123	11.9676	2.40177	1.63745	3.16608	-1.33585	6.01216	1.83065e-09	8.7512e-08	yes
TCONS_00008483	TCONS_00008483	j	XLOC_000486	AGAP005595	AGAP005595-RA	TSS718	2L:17569808-17609749	11151	-	Res	Sus	OK	1.90311	1.27652	2.52969	3.79401	2.60892	4.97911	0.689938	-3.04045	0.00236225	0.0153347	yes
TCONS_00008488	TCONS_00008488	j	XLOC_000488	AGAP005599	AGAP005599-RB	TSS726	2L:17677489-17748898	9224	-	Res	Sus	OK	6.21442	4.27609	8.15274	2.67769	1.81645	3.53892	-0.841919	3.75828	0.000171085	0.00185338	yes
TCONS_00008489	TCONS_00008489	j	XLOC_000493	AGAP005607	AGAP005607-RA	TSS731	2L:17805980-17830388	6716	-	Res	Sus	OK	0.349715	0.158831	0.540599	1.47163	0.934259	2.00899	1.437	-4.3764	1.20657e-05	0.000197249	yes
TCONS_00008496	TCONS_00008496	j	XLOC_000504	AGAP005624	AGAP005624-RA	TSS751	2L:17947212-17955192	1712	-	Res	Sus	OK	2.70937	1.43912	3.97962	6.92254	4.3895	9.45557	0.938067	-3.15462	0.00160709	0.011415	yes
TCONS_00008501	TCONS_00008501	j	XLOC_000521	AGAP005655	AGAP005655-RA	TSS776	2L:18314422-18338386	3509	-	Res	Sus	OK	3.84768	2.52031	5.17505	7.94316	5.40754	10.4788	0.724841	-3.08434	0.00204005	0.0136944	yes
TCONS_00008507	TCONS_00008507	j	XLOC_000546	AGAP005711	AGAP005711-RA	TSS795	2L:19260915-19276332	4604	-	Res	Sus	OK	0.317351	0.111327	0.523375	1.68046	1.04361	2.31731	1.66681	-4.43468	9.22071e-06	0.0001566	yes
TCONS_00008510	TCONS_00008510	j	XLOC_000549	AGAP005715	AGAP005715-RB	TSS800	2L:19502679-19539703	3747	-	Res	Sus	OK	1.00383	0.537769	1.46989	14.4692	9.95022	18.9883	2.6682	-9.53686	0	0	yes
TCONS_00008511	TCONS_00008511	j	XLOC_000550	SCRB12	AGAP005716-RA	TSS802	2L:19542879-19567665	2747	-	Res	Sus	OK	0	0	0	1.82404	1.06552	2.58255	1.79769e+308	1.79769e+308	7.56572e-07	1.77849e-05	yes
TCONS_00008516	TCONS_00008516	j	XLOC_000551	AGAP005719	AGAP005719-RA	TSS808	2L:19575582-19594680	5286	-	Res	Sus	OK	0.39798	0.182075	0.613885	1.40707	0.881933	1.9322	1.26286	-3.83569	0.000125212	0.00142353	yes
TCONS_00008522	TCONS_00008522	j	XLOC_000561	AGAP005739	AGAP005739-RA	TSS823	2L:20039594-20065119	8768	-	Res	Sus	OK	0.399465	0.207771	0.591159	1.72459	1.13751	2.31167	1.46262	-4.97186	6.63121e-07	1.5773e-05	yes
TCONS_00008524	TCONS_00008524	j	XLOC_000561	AGAP005739	AGAP005739-RA	TSS824	2L:20039594-20065119	9265	-	Res	Sus	OK	3.09834	2.09183	4.10485	1.06781	0.679622	1.456	-1.06526	4.36999	1.24253e-05	0.000201931	yes
TCONS_00008538	TCONS_00008538	j	XLOC_000585	AGAP005806	AGAP005806-RA	TSS865	2L:21399275-21484738	3789	-	Res	Sus	OK	4.19258	2.75891	5.62625	2.20744	1.38427	3.03062	-0.641482	2.5357	0.0112222	0.0465548	yes
TCONS_00008541	TCONS_00008541	j	XLOC_000586	AGAP005807	AGAP005807-RD	TSS868	2L:21508729-21610766	3198	-	Res	Sus	OK	13.2447	9.04325	17.4462	6.11542	4.08791	8.14292	-0.772786	3.36834	0.000756227	0.00621244	yes
TCONS_00008546	TCONS_00008546	j	XLOC_000588	AGAP005811	AGAP005811-RA	TSS875	2L:21627293-21632196	4046	-	Res	Sus	OK	1.24031	0.700879	1.77974	0.293553	0.092107	0.494998	-1.44106	3.54746	0.000388963	0.00364765	yes
TCONS_00008552	TCONS_00008552	j	XLOC_000599	AGAP005832	AGAP005832-RA	TSS890	2L:22284706-22295933	3745	-	Res	Sus	OK	2.43095	1.54321	3.31868	4.63115	3.10523	6.15707	0.644525	-2.6208	0.00877235	0.0397803	yes
TCONS_00008553	TCONS_00008553	j	XLOC_000599	AGAP005832	AGAP005832-RA	TSS890	2L:22284706-22295933	3594	-	Res	Sus	OK	0	0	0	3.205	2.10323	4.30676	1.79769e+308	1.79769e+308	2.97894e-09	1.33306e-07	yes
TCONS_00008554	TCONS_00008554	j	XLOC_000599	AGAP005832	AGAP005832-RA	TSS891	2L:22284706-22295933	4804	-	Res	Sus	OK	6.22363	4.22344	8.22383	16.8937	11.6555	22.1319	0.998588	-4.47216	7.74327e-06	0.000134722	yes
TCONS_00008559	TCONS_00008559	j	XLOC_000600	AGAP005841	AGAP005841-RA	TSS895	2L:22376629-22420970	7177	-	Res	Sus	OK	1.39216	0.875391	1.90893	3.17222	2.13504	4.20941	0.823578	-3.32986	0.000868886	0.00696545	yes
TCONS_00008560	TCONS_00008560	j	XLOC_000600	AGAP005841	AGAP005841-RA	TSS897	2L:22376629-22420970	4180	-	Res	Sus	OK	3.35269	2.19283	4.51254	1.67554	1.03665	2.31442	-0.693629	2.69448	0.00704993	0.0339924	yes
TCONS_00008564	TCONS_00008564	j	XLOC_000609	AGAP005857	AGAP005857-RA	TSS910	2L:22632770-22635971	2113	-	Res	Sus	OK	0.193503	0	0.423076	1.05206	0.496066	1.60804	1.69321	-2.60738	0.00912393	0.0406559	yes
TCONS_00008565	TCONS_00008565	j	XLOC_000611	AGAP005865	AGAP005865-RA	TSS912	2L:22649438-22674320	9489	-	Res	Sus	OK	11.4741	7.92454	15.0236	1.12728	0.715649	1.53892	-2.32028	9.69655	0	0	yes
TCONS_00008566	TCONS_00008566	j	XLOC_000611	AGAP005865	AGAP005865-RA	TSS913	2L:22649438-22674320	6758	-	Res	Sus	OK	1.93422	1.23468	2.63375	9.01893	6.20622	11.8316	1.53962	-6.4479	1.13414e-10	7.1899e-09	yes
TCONS_00008567	TCONS_00008567	j	XLOC_000612	AGAP005869	AGAP005869-RA	TSS915	2L:22677295-22684114	2373	-	Res	Sus	OK	33.528	23.1128	43.9433	59.3319	40.9308	77.7329	0.570765	-2.60054	0.00930759	0.0412577	yes
TCONS_00008569	TCONS_00008569	j	XLOC_000620	AGAP005886	AGAP005886-RA	TSS924	2L:23155878-23171706	6003	-	Res	Sus	OK	5.89111	4.00114	7.78108	16.3684	11.2891	21.4478	1.02191	-4.57909	4.67014e-06	8.7425e-05	yes
TCONS_00008571	TCONS_00008571	j	XLOC_000624	AGAP005891	AGAP005891-RB	TSS932	2L:23191392-23210430	3475	-	Res	Sus	OK	0.512768	0.230471	0.795066	2.2086	1.40885	3.00836	1.46029	-4.43218	9.32837e-06	0.000158002	yes
TCONS_00008572	TCONS_00008572	j	XLOC_000624	AGAP005891	AGAP005891-RB	TSS933	2L:23191392-23210430	3380	-	Res	Sus	OK	3.25876	2.11872	4.3988	1.36239	0.813047	1.91172	-0.872109	3.26738	0.00108547	0.00833525	yes
TCONS_00008577	TCONS_00008577	j	XLOC_000630	AGAP005901	AGAP005901-RC	TSS943	2L:23456634-23485901	5229	-	Res	Sus	OK	1.12463	0.668267	1.58099	3.27179	2.18716	4.35642	1.06789	-4.076	4.58172e-05	0.000620691	yes
TCONS_00008578	TCONS_00008578	j	XLOC_000630	AGAP005901	AGAP005901-RC	TSS945	2L:23456634-23485901	3880	-	Res	Sus	OK	0	0	0	1.62667	0.999203	2.25413	1.79769e+308	1.79769e+308	1.08068e-07	3.17462e-06	yes
TCONS_00008580	TCONS_00008580	j	XLOC_000630	AGAP005901	AGAP005901-RC	TSS946	2L:23456634-23485901	5351	-	Res	Sus	OK	0	0	0	0.665453	0.371223	0.959684	1.79769e+308	1.79769e+308	3.04345e-06	6.05437e-05	yes
TCONS_00008584	TCONS_00008584	j	XLOC_000640	AGAP005918	AGAP005918-RA	TSS956	2L:23657965-23682441	3114	-	Res	Sus	OK	1.26822	0.701508	1.83493	2.64422	1.68114	3.6073	0.734762	-2.5491	0.0108002	0.0454059	yes
TCONS_00008586	TCONS_00008586	j	XLOC_000640	AGAP005918	AGAP005918-RA	TSS959	2L:23657965-23682441	3191	-	Res	Sus	OK	4.33899	2.84934	5.82865	1.60099	0.955227	2.24675	-0.997022	3.76463	0.000166796	0.00181538	yes
TCONS_00008588	TCONS_00008588	j	XLOC_000647	AGAP005931	AGAP005931-RA	TSS963	2L:23847252-23849640	2250	-	Res	Sus	OK	0.381265	0.0485058	0.714024	1.49474	0.775031	2.21444	1.36621	-2.74124	0.00612077	0.0308895	yes
TCONS_00008591	TCONS_00008591	j	XLOC_000652	AGAP005940	AGAP005940-RB	TSS969	2L:23872259-23880641	7233	-	Res	Sus	OK	0.279783	0.126033	0.433534	3.03152	2.04611	4.01693	2.3828	-7.46407	8.39329e-14	9.82326e-12	yes
TCONS_00008592	TCONS_00008592	j	XLOC_000652	AGAP005940	AGAP005940-RB	TSS969	2L:23872259-23880641	7104	-	Res	Sus	OK	0	0	0	0.335772	0.167544	0.504	1.79769e+308	1.79769e+308	3.27773e-05	0.000465475	yes
TCONS_00008593	TCONS_00008593	j	XLOC_000653	AGAP005943	AGAP005943-RB	TSS971	2L:23887153-23974728	11155	-	Res	Sus	OK	1.81296	1.21127	2.41464	5.43266	3.74687	7.11845	1.09747	-4.83092	1.35901e-06	2.96849e-05	yes
TCONS_00008594	TCONS_00008594	j	XLOC_000653	AGAP005943	AGAP005943-RB	TSS973	2L:23887153-23974728	9633	-	Res	Sus	OK	3.82339	2.60497	5.0418	1.69367	1.12869	2.25865	-0.814241	3.52992	0.000415682	0.00384268	yes
TCONS_00008595	TCONS_00008595	j	XLOC_000657	AGAP005952	AGAP005952-RA	TSS978	2L:24024063-24034855	3409	-	Res	Sus	OK	12.9112	8.76968	17.0526	31.2844	21.5572	41.0117	0.88503	-3.96225	7.42472e-05	0.000926211	yes
TCONS_00008597	TCONS_00008597	j	XLOC_000662	AGAP005961	AGAP005961-RA	TSS984	2L:24056966-24075702	4839	-	Res	Sus	OK	4.99665	3.35708	6.63623	24.6888	16.9999	32.3777	1.59758	-7.06273	1.63247e-12	1.52929e-10	yes
TCONS_00008598	TCONS_00008598	j	XLOC_000667	AGAP005976	AGAP005976-RA	TSS991	2L:24341920-24406816	5957	-	Res	Sus	OK	0.580399	0.309527	0.85127	5.67152	3.87373	7.4693	2.2795	-8.08089	6.66134e-16	1.13482e-13	yes
TCONS_00008604	TCONS_00008604	j	XLOC_000676	AGAP005988	AGAP005988-RA	TSS1006	2L:24558899-24561948	1668	-	Res	Sus	OK	0	0	0	0.695342	0.160995	1.22969	1.79769e+308	1.79769e+308	0.00462621	0.0252971	yes
TCONS_00008613	TCONS_00008613	j	XLOC_000689	AGAP006028	AGAP006028-RC	TSS1027	2L:25359764-25435023	3744	-	Res	Sus	OK	0	0	0	2.24589	1.426	3.06578	1.79769e+308	1.79769e+308	2.14475e-08	7.68122e-07	yes
TCONS_00008614	TCONS_00008614	j	XLOC_000689	AGAP006028	AGAP006028-RC	TSS1027	2L:25359764-25435023	3748	-	Res	Sus	OK	0.455245	0.190477	0.720014	0.0184295	0	0.0542806	-3.20688	3.15889	0.00158371	0.0112779	yes
TCONS_00008633	TCONS_00008633	j	XLOC_000720	AGAP006089	AGAP006089-RA	TSS1072	2L:26386790-26544777	7521	-	Res	Sus	OK	0.164277	0.0580967	0.270457	0.994984	0.631584	1.35838	1.80117	-4.85228	1.22049e-06	2.69259e-05	yes
TCONS_00008636	TCONS_00008636	j	XLOC_000721	AGAP006091	AGAP006091-RA	TSS1074	2L:26551921-26586768	4962	-	Res	Sus	OK	4.53548	3.05008	6.02088	9.08488	6.24818	11.9216	0.69468	-3.07041	0.00213769	0.0142178	yes
TCONS_00008642	TCONS_00008642	j	XLOC_000729	AGAP006107	AGAP006107-RC	TSS1086	2L:26694458-26765811	7015	-	Res	Sus	OK	0.402662	0.205918	0.599406	6.61524	4.54361	8.68687	2.79903	-9.646	0	0	yes
TCONS_00008643	TCONS_00008643	j	XLOC_000729	AGAP006107	AGAP006107-RC	TSS1087	2L:26694458-26765811	6526	-	Res	Sus	OK	7.5157	5.16809	9.8633	4.04049	2.75063	5.33036	-0.620626	2.77914	0.00545028	0.0283588	yes
TCONS_00008646	TCONS_00008646	j	XLOC_000731	AGAP006113	AGAP006113-RA	TSS1092	2L:26775787-26842831	5823	-	Res	Sus	OK	4.17358	2.80428	5.54287	0.466917	0.235869	0.697966	-2.19038	7.37846	1.60094e-13	1.77483e-11	yes
TCONS_00008647	TCONS_00008647	j	XLOC_000731	AGAP006113	AGAP006113-RA	TSS1092	2L:26775787-26842831	5826	-	Res	Sus	OK	1.63214	1.02499	2.23929	7.50202	5.14542	9.85861	1.52528	-6.26545	3.71743e-10	2.12742e-08	yes
TCONS_00008661	TCONS_00008661	j	XLOC_000758	AGAP006165	AGAP006165-RB	TSS1130	2L:27443821-27474889	10882	-	Res	Sus	OK	5.53218	3.80335	7.26101	3.12766	2.13244	4.12289	-0.570296	2.55741	0.0105454	0.0450171	yes
TCONS_00008662	TCONS_00008662	j	XLOC_000758	AGAP006165	AGAP006165-RB	TSS1132	2L:27443821-27474889	11381	-	Res	Sus	OK	0.184347	0.0817984	0.286895	0.860993	0.551519	1.17047	1.54127	-4.65427	3.25127e-06	6.40713e-05	yes
TCONS_00008666	TCONS_00008666	j	XLOC_000762	AGAP006171	AGAP006171-RA	TSS1140	2L:27646631-27651664	4420	-	Res	Sus	OK	1.85624	1.17301	2.53948	3.73748	2.50784	4.96711	0.699855	-2.83525	0.00457893	0.0251008	yes
TCONS_00008668	TCONS_00008668	j	XLOC_000767	AGAP006184	AGAP006184-RA	TSS1146	2L:27856226-27871810	2626	-	Res	Sus	OK	1.70779	0.954079	2.46151	7.99069	5.37617	10.6052	1.54307	-5.61735	1.93913e-08	7.03043e-07	yes
TCONS_00008669	TCONS_00008669	j	XLOC_000767	AGAP006184	AGAP006184-RA	TSS1146	2L:27856226-27871810	2607	-	Res	Sus	OK	0	0	0	4.02047	2.58966	5.45128	1.79769e+308	1.79769e+308	9.55555e-09	3.7712e-07	yes
TCONS_00008671	TCONS_00008671	j	XLOC_000768	ATC1_ANOGA	AGAP006186-RD	TSS1149	2L:27894348-27929127	5517	-	Res	Sus	OK	49.228	33.4576	64.9985	20.4367	14.0535	26.82	-0.879131	3.92978	8.50249e-05	0.0010332	yes
TCONS_00008682	TCONS_00008682	j	XLOC_000778	AGAP006223	AGAP006223-RA	TSS1165	2L:28524226-28528387	1723	-	Res	Sus	OK	0	0	0	4.01954	2.41318	5.62591	1.79769e+308	1.79769e+308	2.79997e-07	7.34066e-06	yes
TCONS_00008683	TCONS_00008683	j	XLOC_000779	AGAP006225	AGAP006225-RA	TSS1166	2L:28528881-28539416	3951	-	Res	Sus	OK	0.898348	0.467381	1.32931	5.0863	3.40622	6.76638	1.73375	-5.95327	2.62838e-09	1.19682e-07	yes
TCONS_00008694	TCONS_00008694	j	XLOC_000802	AGAP006279	AGAP006279-RA	TSS1196	2L:29397207-29420323	1978	-	Res	Sus	OK	0.35289	0.026081	0.679699	5.47955	3.54035	7.41875	2.74262	-5.53278	3.15201e-08	1.07229e-06	yes
TCONS_00008698	TCONS_00008698	j	XLOC_000806	AGAP006328	AGAP006328-RA	TSS1203	2L:29589349-29776471	6625	-	Res	Sus	OK	1.73532	1.12308	2.34756	0.550738	0.306781	0.794694	-1.14769	4.05331	5.04987e-05	0.000674789	yes
TCONS_00008701	TCONS_00008701	j	XLOC_000817	AGAP006340	AGAP006340-RC	TSS1208	2L:29910413-29965172	8709	-	Res	Sus	OK	3.56792	2.42174	4.71409	1.55933	1.02755	2.09111	-0.827725	3.53344	0.000410191	0.00380228	yes
TCONS_00008702	TCONS_00008702	j	XLOC_000817	AGAP006340	AGAP006340-RC	TSS1208	2L:29910413-29965172	8937	-	Res	Sus	OK	0.360657	0.187071	0.534242	2.54749	1.71857	3.37641	1.95494	-6.72987	1.69815e-11	1.29857e-09	yes
TCONS_00008707	TCONS_00008707	j	XLOC_000832	AGAP006360	AGAP006360-RA	TSS1222	2L:30462047-30493512	7181	-	Res	Sus	OK	6.99543	4.79884	9.19203	2.33995	1.5551	3.12479	-1.09513	4.76707	1.86921e-06	3.92926e-05	yes
TCONS_00008711	TCONS_00008711	j	XLOC_000837	AGAP013401	AGAP013401-RA	TSS1228	2L:30505888-30512329	2705	-	Res	Sus	OK	0.2053	0	0.411615	2.14692	1.29635	2.99749	2.34731	-4.34601	1.38633e-05	0.000221869	yes
TCONS_00008712	TCONS_00008712	j	XLOC_000840	CPR144	AGAP006369-RA	TSS1231	2L:30553003-30556616	2155	-	Res	Sus	OK	0.0220492	0	0.0660979	1.37012	0.704523	2.03572	4.12938	-4.01698	5.89489e-05	0.000766353	yes
TCONS_00008724	TCONS_00008724	j	XLOC_000848	AGAP006381	AGAP006381-RA	TSS1249	2L:30879450-30957382	2279	-	Res	Sus	OK	5.84268	3.79962	7.88574	1.08756	0.53538	1.63974	-1.68125	5.45428	4.91717e-08	1.58597e-06	yes
TCONS_00008730	TCONS_00008730	j	XLOC_000855	AGAP006398	AGAP006398-RA	TSS1261	2L:31084023-31089848	1335	-	Res	Sus	OK	168.62	115.323	221.917	80.1031	55.2557	104.951	-0.74433	3.36147	0.000775296	0.00633254	yes
TCONS_00008735	TCONS_00008735	j	XLOC_000874	AGAP006436	AGAP006436-RA	TSS1279	2L:31825976-31873758	1746	-	Res	Sus	OK	2.59298	1.42955	3.7564	0.745297	0.24655	1.24404	-1.24678	3.09494	0.00196854	0.0133299	yes
TCONS_00008736	TCONS_00008736	j	XLOC_000874	AGAP006436	AGAP006436-RA	TSS1281	2L:31825976-31873758	8667	-	Res	Sus	OK	1.92589	1.26629	2.58548	0.849135	0.520479	1.17779	-0.818923	3.16908	0.00152924	0.010959	yes
TCONS_00008740	TCONS_00008740	j	XLOC_000881	AGAP006452	AGAP006452-RB	TSS1289	2L:32266594-32298155	6214	-	Res	Sus	OK	0	0	0	5.54171	3.79429	7.28912	1.79769e+308	1.79769e+308	1.12845e-10	7.16413e-09	yes
TCONS_00008742	TCONS_00008742	j	XLOC_000881	AGAP006452	AGAP006452-RB	TSS1289	2L:32266594-32298155	6630	-	Res	Sus	OK	0.551855	0.297291	0.806419	9.57566	6.60459	12.5467	2.85369	-10.2664	0	0	yes
TCONS_00008743	TCONS_00008743	j	XLOC_000881	AGAP006452	AGAP006452-RB	TSS1290	2L:32266594-32298155	6583	-	Res	Sus	OK	1.62847	1.04296	2.21398	5.94695	4.07294	7.82096	1.29524	-5.41833	6.01587e-08	1.88924e-06	yes
TCONS_00008744	TCONS_00008744	j	XLOC_000881	AGAP006452	AGAP006452-RB	TSS1291	2L:32266594-32298155	6050	-	Res	Sus	OK	1.29659	0.807126	1.78605	2.68104	1.79047	3.57161	0.726467	-2.88947	0.00385895	0.0221358	yes
TCONS_00008746	TCONS_00008746	j	XLOC_000885	AGAP006460	AGAP006460-RA	TSS1295	2L:32387042-32431005	14047	-	Res	Sus	OK	0.172177	0.0841739	0.26018	0.8121	0.532483	1.09172	1.5511	-5.0338	4.80848e-07	1.1866e-05	yes
TCONS_00008753	TCONS_00008753	j	XLOC_000888	AGAP006463	AGAP006463-RA	TSS1304	2L:32489109-32506238	1511	-	Res	Sus	OK	0	0	0	0.613366	0.0704197	1.15631	1.79769e+308	1.79769e+308	0.0119293	0.0486602	yes
TCONS_00008758	TCONS_00008758	j	XLOC_000898	AGAP006477	AGAP006477-RA	TSS1317	2L:32724915-32737220	3307	-	Res	Sus	OK	2.94516	1.8642	4.02612	1.07963	0.591964	1.56729	-1.00355	3.44854	0.000563619	0.00488673	yes
TCONS_00008760	TCONS_00008760	j	XLOC_000899	AGAP006478	AGAP006478-RA	TSS1320	2L:32742580-32818426	7316	-	Res	Sus	OK	2.86206	1.91509	3.80903	0.290301	0.138863	0.441739	-2.28838	7.40887	1.27454e-13	1.43095e-11	yes
TCONS_00008778	TCONS_00008778	j	XLOC_000934	AGAP006569	AGAP006569-RA	TSS1368	2L:34158586-34168048	4885	-	Res	Sus	OK	0.757564	0.401756	1.11337	6.22564	4.23049	8.22079	2.10632	-7.40892	1.27232e-13	1.4321e-11	yes
TCONS_00008780	TCONS_00008780	j	XLOC_000938	AGAP006574	AGAP006574-RB	TSS1372	2L:34207127-34220709	4586	-	Res	Sus	OK	0.96152	0.533506	1.38953	4.80879	3.23576	6.38182	1.60969	-5.82787	5.61399e-09	2.33465e-07	yes
TCONS_00008781	TCONS_00008781	j	XLOC_000938	AGAP006574	AGAP006574-RB	TSS1372	2L:34207127-34220709	3699	-	Res	Sus	OK	0.950007	0.500389	1.39962	2.56909	1.63781	3.50038	0.994839	-3.33754	0.000845229	0.00681419	yes
TCONS_00008785	TCONS_00008785	j	XLOC_000945	AGAP006601	AGAP006601-RB	TSS1382	2L:34641824-34667651	4862	-	Res	Sus	OK	0	0	0	0.315507	0.132935	0.49808	1.79769e+308	1.79769e+308	0.000273878	0.00272722	yes
TCONS_00008791	TCONS_00008791	j	XLOC_000955	AGAP006618	AGAP006618-RA	TSS1399	2L:34750320-34751796	1283	-	Res	Sus	OK	0.15846	0	0.395152	1.73212	0.837726	2.62652	2.3916	-3.02652	0.00247387	0.0158886	yes
TCONS_00008794	TCONS_00008794	j	XLOC_000960	AGAP006629	AGAP006629-RA	TSS1405	2L:34782312-34792568	2576	-	Res	Sus	OK	1.84292	1.05777	2.62808	3.95517	2.56797	5.34237	0.763672	-2.76776	0.00564434	0.0291043	yes
TCONS_00008796	TCONS_00008796	j	XLOC_000962	AGAP006632	AGAP006632-RA	TSS1409	2L:34856170-34860161	2016	-	Res	Sus	OK	0.133124	0	0.306536	1.03711	0.510489	1.56373	2.05291	-2.93672	0.00331707	0.0197863	yes
TCONS_00008806	TCONS_00008806	j	XLOC_000967	AGAP006645	AGAP006645-RD	TSS1422	2L:35623698-35652426	4631	-	Res	Sus	OK	0	0	0	0.444701	0.203639	0.685762	1.79769e+308	1.79769e+308	0.000112337	0.00129857	yes
TCONS_00008812	TCONS_00008812	j	XLOC_000979	AGAP006665	AGAP006665-RC	TSS1438	2L:36439822-36514274	6317	-	Res	Sus	OK	0.661265	0.363622	0.958907	1.91323	1.24879	2.57766	1.06239	-3.73745	0.000185896	0.00198315	yes
TCONS_00008823	TCONS_00008823	j	XLOC_001002	AGAP006726	AGAP006726-RA	TSS1469	2L:37288437-37295468	1003	-	Res	Sus	OK	4.35695	2.35899	6.35491	1.10893	0.297738	1.92012	-1.36838	3.16989	0.00152494	0.0109353	yes
TCONS_00008827	TCONS_00008827	j	XLOC_001013	AGAP006745	AGAP006745-RB	TSS1481	2L:37706861-37710190	1371	-	Res	Sus	OK	2.96827	1.62936	4.30718	15.41	10.3405	20.4794	1.64704	-5.90026	3.62938e-09	1.59184e-07	yes
TCONS_00008828	TCONS_00008828	j	XLOC_001013	AGAP006745	AGAP006745-RB	TSS1481	2L:37706861-37710190	1239	-	Res	Sus	OK	2.13386	1.04945	3.21826	0	0	0	-1.79769e+308	-1.79769e+308	4.15065e-05	0.000569286	yes
TCONS_00008829	TCONS_00008829	j	XLOC_001013	AGAP006745	AGAP006745-RB	TSS1481	2L:37706861-37710190	1299	-	Res	Sus	OK	1.75008	0.807772	2.69239	6.76034	4.26683	9.25384	1.35141	-4.14125	3.45412e-05	0.00048661	yes
TCONS_00008830	TCONS_00008830	j	XLOC_001014	AGAP006746	AGAP006746-RA	TSS1482	2L:37727354-37732898	1596	-	Res	Sus	OK	0.23888	0	0.518957	2.54218	1.4313	3.65307	2.36482	-3.77994	0.000156864	0.00172343	yes
TCONS_00008831	TCONS_00008831	j	XLOC_001018	AGAP006755	AGAP006755-RA	TSS1484	2L:37874137-37880455	5255	-	Res	Sus	OK	0.338937	0.139545	0.538329	5.29149	3.59113	6.99185	2.74804	-8.19909	2.22045e-16	4.1165e-14	yes
TCONS_00008847	TCONS_00008847	j	XLOC_001057	CPR59	AGAP006829-RA	TSS1530	2L:39074152-39077012	1395	-	Res	Sus	OK	20.1268	13.4461	26.8075	113.338	78.2185	148.458	1.72833	-7.6123	2.68674e-14	3.37741e-12	yes
TCONS_00008850	TCONS_00008850	j	XLOC_001082	CPR140	AGAP006868-RB	TSS1550	2L:39268946-39276154	2927	-	Res	Sus	OK	0	0	0	2.44391	1.4141	3.47372	1.79769e+308	1.79769e+308	1.03578e-06	2.3329e-05	yes
TCONS_00008854	TCONS_00008854	j	XLOC_001096	AGAP006889	AGAP006889-RA	TSS1563	2L:39373036-39375733	2577	-	Res	Sus	OK	0.0995966	0	0.239849	1.24346	0.659763	1.82716	2.52453	-3.40145	0.000670294	0.0056259	yes
TCONS_00008855	TCONS_00008855	j	XLOC_001097	AGAP006890	AGAP006890-RA	TSS1564	2L:39376197-39413052	4582	-	Res	Sus	OK	0.925558	0.528556	1.32256	4.24671	2.86429	5.62913	1.5235	-5.65863	1.52585e-08	5.72007e-07	yes
TCONS_00008856	TCONS_00008856	j	XLOC_001098	AGAP006892	AGAP006892-RA	TSS1565	2L:39428785-39484862	3056	-	Res	Sus	OK	8.28414	5.59104	10.9772	1.02351	0.55177	1.49525	-2.0911	7.415	1.2168e-13	1.37664e-11	yes
TCONS_00008857	TCONS_00008857	j	XLOC_001098	AGAP006892	AGAP006892-RA	TSS1565	2L:39428785-39484862	3061	-	Res	Sus	OK	8.93117	6.04048	11.8219	3.54418	2.30521	4.78315	-0.92424	3.88005	0.000104434	0.00122324	yes
TCONS_00008862	TCONS_00008862	j	XLOC_001106	AGAP006904	AGAP006904-RC	TSS1576	2L:39815883-39838131	3660	-	Res	Sus	OK	11.2329	7.63158	14.8341	4.45691	2.92135	5.99246	-0.924388	3.92833	8.55367e-05	0.00103828	yes
TCONS_00008867	TCONS_00008867	j	XLOC_001112	SRPN2	AGAP006911-RA	TSS1584	2L:39869645-39924073	1512	-	Res	Sus	OK	2.29104	1.17115	3.41093	18.0694	12.2044	23.9345	2.06522	-7.03933	1.93157e-12	1.77555e-10	yes
TCONS_00008870	TCONS_00008870	j	XLOC_001116	AGAP006921	AGAP006921-RB	TSS1588	2L:40002078-40030781	2823	-	Res	Sus	OK	0.534891	0.173673	0.896108	2.08922	1.22119	2.95726	1.36249	-3.43677	0.000588692	0.00506432	yes
TCONS_00008880	TCONS_00008880	j	XLOC_001131	AGAP006959	AGAP006959-RA	TSS1606	2L:40255762-40263682	3189	-	Res	Sus	OK	468.382	286.849	649.916	60.551	41.5079	79.5941	-2.0458	8.1976	2.22045e-16	4.35434e-14	yes
TCONS_00008891	TCONS_00008891	j	XLOC_001149	AGAP007001	AGAP007001-RA	TSS1634	2L:40589334-40592012	1296	-	Res	Sus	OK	0.619694	0.0923607	1.14703	2.31499	1.20896	3.42103	1.31794	-2.70095	0.00691422	0.0334807	yes
TCONS_00008906	TCONS_00008906	j	XLOC_001184	AGAP007086	AGAP007086-RA	TSS1673	2L:42308293-42409102	12338	-	Res	Sus	OK	0	0	0	0.560689	0.343107	0.778272	1.79769e+308	1.79769e+308	1.27625e-07	3.68052e-06	yes
TCONS_00008908	TCONS_00008908	j	XLOC_001184	AGAP007086	AGAP007086-RA	TSS1675	2L:42308293-42409102	3786	-	Res	Sus	OK	5.30243	3.54821	7.05664	1.72977	1.07137	2.38818	-1.12018	4.4424	8.89618e-06	0.000152437	yes
TCONS_00008913	TCONS_00008913	j	XLOC_001186	AGAP007092	AGAP007092-RA	TSS1680	2L:42465137-42561148	8916	-	Res	Sus	OK	0	0	0	0.0885481	0.0171498	0.159946	1.79769e+308	1.79769e+308	0.00656178	0.0322807	yes
TCONS_00008924	TCONS_00008924	j	XLOC_001211	AGAP007133	AGAP007133-RA	TSS1710	2L:43148758-43310013	7430	-	Res	Sus	OK	0.690505	0.388308	0.992702	0.127427	0.0286164	0.226237	-1.68988	3.79575	0.000147198	0.00163432	yes
TCONS_00008926	TCONS_00008926	j	XLOC_001214	AGAP007137	AGAP007137-RB	TSS1715	2L:43487914-43551703	4959	-	Res	Sus	OK	1.58409	0.984328	2.18385	3.17605	2.11551	4.23659	0.695629	-2.75591	0.0058529	0.0299001	yes
TCONS_00008929	TCONS_00008929	j	XLOC_001214	AGAP007137	AGAP007137-RB	TSS1717	2L:43487914-43551703	3348	-	Res	Sus	OK	4.4401	2.93308	5.94712	1.1684	0.66634	1.67047	-1.33504	4.87614	1.0818e-06	2.41927e-05	yes
TCONS_00008939	TCONS_00008939	j	XLOC_001235	AGAP007180	AGAP007180-RA	TSS1739	2L:44029783-44058534	7098	-	Res	Sus	OK	1.89454	1.22955	2.55953	0.836938	0.499068	1.17481	-0.816982	3.05442	0.00225499	0.0147995	yes
TCONS_00008944	TCONS_00008944	j	XLOC_001251	AGAP007221	AGAP007221-RB	TSS1753	2L:44384807-44398985	4742	-	Res	Sus	OK	1.46307	0.89362	2.03252	3.08906	2.05158	4.12653	0.747328	-2.90739	0.00364463	0.0212405	yes
TCONS_00008950	TCONS_00008950	j	XLOC_001259	AGAP007247	AGAP007247-RB	TSS1760	2L:44523367-44637251	10122	-	Res	Sus	OK	0.162927	0.0645897	0.261264	1.11862	0.728581	1.50866	1.92655	-5.52777	3.2432e-08	1.09823e-06	yes
TCONS_00008952	TCONS_00008952	j	XLOC_001260	AGAP007248	AGAP007248-RB	TSS1764	2L:44523367-44637251	6628	-	Res	Sus	OK	0.177068	0.0541864	0.29995	1.50632	0.972207	2.04044	2.14089	-5.49427	3.92321e-08	1.29472e-06	yes
TCONS_00008959	TCONS_00008959	j	XLOC_001281	AGAP007307	AGAP007307-RA	TSS1794	2L:45166996-45252700	2510	-	Res	Sus	OK	0	0	0	1.7437	0.992194	2.49521	1.79769e+308	1.79769e+308	1.73745e-06	3.6821e-05	yes
TCONS_00008966	TCONS_00008966	j	XLOC_001286	AGAP007315	AGAP007315-RA	TSS1806	2L:45288384-45350974	1467	-	Res	Sus	OK	0.874864	0.243561	1.50617	2.63141	1.41041	3.8524	1.1012	-2.56718	0.0102531	0.0441491	yes
TCONS_00008969	TCONS_00008969	j	XLOC_001288	AGAP007327	AGAP007327-RB	TSS1810	2L:45425505-45591632	5657	-	Res	Sus	OK	0.190131	0.0442616	0.336	1.79255	1.14556	2.43954	2.24368	-5.29254	1.20629e-07	3.49704e-06	yes
TCONS_00008971	TCONS_00008971	j	XLOC_001288	AGAP007327	AGAP007327-RB	TSS1811	2L:45425505-45591632	5209	-	Res	Sus	OK	0.19907	0.0455708	0.35257	1.85142	1.17932	2.52353	2.23005	-5.23325	1.66553e-07	4.66e-06	yes
TCONS_00008976	TCONS_00008976	j	XLOC_001294	AGAP007336	AGAP007336-RA	TSS1821	2L:45648241-45700031	7010	-	Res	Sus	OK	0.0907773	0.00240653	0.179148	0.449512	0.236381	0.662644	1.59975	-2.9548	0.00312869	0.0189054	yes
TCONS_00008978	TCONS_00008978	j	XLOC_001296	AGAP007340	AGAP007340-RA	TSS1824	2L:45811582-45878638	2852	-	Res	Sus	OK	1.10781	0.563065	1.65255	0.285525	0.0553412	0.515708	-1.35581	2.87154	0.00408483	0.0230923	yes
TCONS_00008979	TCONS_00008979	j	XLOC_001296	AGAP007340	AGAP007340-RA	TSS1826	2L:45811582-45878638	2033	-	Res	Sus	OK	0	0	0	1.69993	0.90226	2.4976	1.79769e+308	1.79769e+308	1.01191e-05	0.000169702	yes
TCONS_00008989	TCONS_00008989	j	XLOC_001315	AGAP007382	AGAP007382-RA	TSS1851	2L:46203876-46209449	2267	-	Res	Sus	OK	4.90162	3.12437	6.67887	16.7182	11.4298	22.0065	1.22693	-5.09974	3.40115e-07	8.74527e-06	yes
TCONS_00009001	TCONS_00009001	j	XLOC_001335	AGAP007416	AGAP007416-RA	TSS1878	2L:46373755-46521291	4714	-	Res	Sus	OK	0.695431	0.358329	1.03253	2.60618	1.70036	3.512	1.32111	-4.42979	9.43265e-06	0.000159585	yes
TCONS_00009015	TCONS_00009015	j	XLOC_001396	AGAP007500	AGAP007500-RA	TSS1933	2L:46930110-46957639	3337	-	Res	Sus	OK	0.27188	0.0597794	0.48398	1.6736	1.00941	2.3378	1.81737	-4.15272	3.28551e-05	0.00046643	yes
TCONS_00009017	TCONS_00009017	j	XLOC_001397	AGAP007501	AGAP007501-RA	TSS1935	2L:46958439-46968735	2547	-	Res	Sus	OK	1.92298	1.09	2.75596	4.89198	3.20016	6.58379	0.933721	-3.36906	0.000754244	0.00619961	yes
TCONS_00009021	TCONS_00009021	j	XLOC_001398	AGAP007503	AGAP007503-RA	TSS1938	2L:46973435-46994721	9402	-	Res	Sus	OK	1.63001	1.06459	2.19543	3.13004	2.11876	4.14132	0.65246	-2.75276	0.00590955	0.030092	yes
TCONS_00009023	TCONS_00009023	j	XLOC_001406	AGAP007523	AGAP007523-RB	TSS1949	2L:47144809-47189580	9206	-	Res	Sus	OK	5.06638	3.47221	6.66054	0.809912	0.509547	1.11028	-1.83346	7.5395	4.70735e-14	5.7061e-12	yes
TCONS_00009024	TCONS_00009024	j	XLOC_001406	AGAP007523	AGAP007523-RB	TSS1950	2L:47144809-47189580	9340	-	Res	Sus	OK	7.57547	5.21992	9.93102	2.97503	2.02442	3.92564	-0.934661	4.19268	2.75675e-05	0.000401042	yes
TCONS_00009027	TCONS_00009027	j	XLOC_001407	AGAP007525	AGAP007525-RA	TSS1956	2L:47194848-47228700	4634	-	Res	Sus	OK	9.88409	6.77289	12.9953	3.96697	2.65715	5.27679	-0.912924	4.00249	6.26799e-05	0.000803961	yes
TCONS_00009042	TCONS_00009042	j	XLOC_001429	AGAP007562	AGAP007562-RA	TSS1996	2L:47577503-47716624	13105	-	Res	Sus	OK	0	0	0	0.385173	0.220854	0.549492	1.79769e+308	1.79769e+308	1.37868e-06	3.00996e-05	yes
TCONS_00009043	TCONS_00009043	j	XLOC_001429	AGAP007562	AGAP007562-RA	TSS1996	2L:47577503-47716624	13174	-	Res	Sus	OK	1.75769	1.17591	2.33947	4.14351	2.85002	5.43699	0.857542	-3.7696	0.000163511	0.00178667	yes
TCONS_00009044	TCONS_00009044	j	XLOC_001429	AGAP007563	AGAP007563-RC	TSS1996	2L:47577503-47716624	58969	-	Res	Sus	OK	0	0	0	0.0270473	0.0117212	0.0423733	1.79769e+308	1.79769e+308	0.00020811	0.00217439	yes
TCONS_00009046	TCONS_00009046	j	XLOC_001429	AGAP007563	AGAP007563-RC	TSS1998	2L:47577503-47716624	29603	-	Res	Sus	OK	0	0	0	1.28294	0.878705	1.68718	1.79769e+308	1.79769e+308	1.09439e-10	7.00839e-09	yes
TCONS_00009047	TCONS_00009047	j	XLOC_001429	AGAP007563	AGAP007563-RC	TSS1998	2L:47577503-47716624	49529	-	Res	Sus	OK	1.82569	1.25794	2.39343	0.817029	0.560069	1.07399	-0.804037	3.63579	0.00027713	0.00275339	yes
TCONS_00009052	TCONS_00009052	j	XLOC_001440	AGAP007584	AGAP007584-RA	TSS2015	2L:47816065-47834968	2337	-	Res	Sus	OK	0.35032	0.0713019	0.629337	2.71249	1.66787	3.75712	2.04678	-4.62712	3.70786e-06	7.16296e-05	yes
TCONS_00009056	TCONS_00009056	j	XLOC_001442	AGAP007587	AGAP007587-RB	TSS2023	2L:47990048-48053135	5131	-	Res	Sus	OK	2.42388	1.58565	3.2621	0.37562	0.179262	0.571978	-1.86455	5.9495	2.68971e-09	1.21721e-07	yes
TCONS_00009064	TCONS_00009064	j	XLOC_001450	AGAP007605	AGAP007605-RA	TSS2034	2L:48160891-48173521	9588	-	Res	Sus	OK	4.44997	3.04088	5.85905	8.93299	6.17609	11.6899	0.696855	-3.15198	0.00162168	0.0115001	yes
TCONS_00009069	TCONS_00009069	j	XLOC_001453	AGAP007608	AGAP007608-RA	TSS2042	2L:48196813-48229127	2639	-	Res	Sus	OK	1.54128	0.845548	2.237	5.54451	3.66457	7.42446	1.2802	-4.53524	5.7539e-06	0.000104391	yes
TCONS_00009074	TCONS_00009074	j	XLOC_001465	AGAP007624	AGAP007624-RA	TSS2058	2L:48381911-48385651	3009	-	Res	Sus	OK	0.437825	0.144652	0.730999	1.32741	0.743786	1.91103	1.10916	-2.76925	0.00561853	0.0290051	yes
TCONS_00009079	TCONS_00009079	j	XLOC_001469	LANB2	AGAP007629-RA	TSS2064	2L:48472393-48483780	5967	-	Res	Sus	OK	2.15618	1.40309	2.90927	6.78291	4.65614	8.90967	1.14607	-4.8835	1.04219e-06	2.34256e-05	yes
TCONS_00009083	TCONS_00009083	j	XLOC_001472	AGAP007633	AGAP007633-RE	TSS2074	2L:48492236-48512012	3671	-	Res	Sus	OK	0.94828	0.477602	1.41896	10.0326	6.83076	13.2345	2.35895	-7.9951	1.33227e-15	2.11452e-13	yes
TCONS_00009088	TCONS_00009088	j	XLOC_001476	AGAP007640	AGAP007640-RA	TSS2084	2L:48548033-48591709	11345	-	Res	Sus	OK	0.409565	0.228008	0.591123	3.99763	2.74412	5.25114	2.27836	-8.39203	0	0	yes
TCONS_00009100	TCONS_00009100	j	XLOC_001491	AGAP007667	AGAP007667-RA	TSS2108	2L:48878756-48886902	2792	-	Res	Sus	OK	0.269595	0.017731	0.52146	1.75869	1.00398	2.51341	1.8754	-3.64837	0.000263912	0.00265132	yes
TCONS_00009116	TCONS_00009116	j	XLOC_001509	AGAP007712	AGAP007712-RA	TSS2138	2L:49180250-49190951	2157	-	Res	Sus	OK	0.0415998	0	0.123623	0.569452	0.173195	0.96571	2.61658	-2.50281	0.012321	0.0498616	yes
TCONS_00009127	TCONS_00009127	j	XLOC_001518	AGAP007726	AGAP007726-RB	TSS2157	2L:49327094-49335475	2734	-	Res	Sus	OK	0.208794	0	0.428295	2.06215	1.21734	2.90695	2.29016	-4.05954	4.91696e-05	0.000659426	yes
TCONS_00009132	TCONS_00009132	j	XLOC_001521	AGAP007730	AGAP007730-RA	TSS2164	2L:49350312-49356343	2482	-	Res	Sus	OK	0.317599	0.0426578	0.592541	4.25229	2.73989	5.76468	2.59442	-5.54422	2.95274e-08	1.01467e-06	yes
TCONS_00009134	TCONS_00009134	j	XLOC_001523	AGAP004677	AGAP004677-RA	TSS2169	2L:157347-186936	1449	-	Res	Sus	OK	1.77225	0.872751	2.67174	9.57924	6.33436	12.8241	1.68735	-5.53045	3.19405e-08	1.08408e-06	yes
TCONS_00009135	TCONS_00009135	j	XLOC_001523	AGAP004677	AGAP004677-RA	TSS2170	2L:157347-186936	1459	-	Res	Sus	OK	2.39873	1.2856	3.51186	16.7109	11.3001	22.1217	1.94112	-6.86097	6.83964e-12	5.68334e-10	yes
TCONS_00009143	TCONS_00009143	j	XLOC_001537	AGAP004691	AGAP004691-RA	TSS2190	2L:1270188-1301023	4654	-	Res	Sus	OK	0.3124	0.108103	0.516697	1.20531	0.71591	1.69471	1.35021	-3.50813	0.000451264	0.00410285	yes
TCONS_00009147	TCONS_00009147	j	XLOC_001539	AGAP004694	AGAP004694-RA	TSS2197	2L:1594197-1627124	2402	-	Res	Sus	OK	1.41795	0.699384	2.13652	0.429459	0.0884729	0.770445	-1.19444	2.53616	0.0112074	0.0465198	yes
TCONS_00009149	TCONS_00009149	j	XLOC_001540	EXD_ANOGA	AGAP004696-RA	TSS2200	2L:1923987-1965683	3626	-	Res	Sus	OK	0	0	0	0.750589	0.381438	1.11974	1.79769e+308	1.79769e+308	2.38555e-05	0.000352859	yes
TCONS_00009150	TCONS_00009150	j	XLOC_001540	EXD_ANOGA	AGAP004696-RA	TSS2201	2L:1923987-1965683	4205	-	Res	Sus	OK	0.303712	0.0918491	0.515575	1.3026	0.770569	1.83463	1.45604	-3.60247	0.000315202	0.00306877	yes
TCONS_00009151	TCONS_00009151	j	XLOC_001542	AGAP004698	AGAP004698-RA	TSS2202	2L:1969022-1971192	1380	-	Res	Sus	OK	0.185748	0	0.449308	1.55138	0.716759	2.38601	2.12251	-2.79743	0.0051511	0.0273702	yes
TCONS_00009162	TCONS_00009162	j	XLOC_001554	AGAP004731	AGAP004731-RA	TSS2222	2L:2867011-2962307	2489	-	Res	Sus	OK	0.658781	0.247774	1.06979	1.91144	1.0976	2.72528	1.06522	-2.82054	0.00479424	0.0259522	yes
TCONS_00009163	TCONS_00009163	j	XLOC_001554	AGAP004731	AGAP004731-RA	TSS2223	2L:2867011-2962307	1502	-	Res	Sus	OK	0	0	0	3.78561	2.2355	5.33573	1.79769e+308	1.79769e+308	5.18998e-07	1.26588e-05	yes
TCONS_00009164	TCONS_00009164	j	XLOC_001555	AGAP004734	AGAP004734-RA	TSS2224	2L:2867011-2962307	15622	-	Res	Sus	OK	1.58043	1.0587	2.10217	0.64454	0.407725	0.881354	-0.896918	3.6317	0.000281564	0.00278991	yes
TCONS_00009170	TCONS_00009170	j	XLOC_001562	AGAP004747	AGAP004747-RA	TSS2236	2L:3033981-3037851	3517	-	Res	Sus	OK	0.187417	0.0117535	0.363081	1.483	0.874528	2.09148	2.06849	-4.04334	5.26949e-05	0.000698216	yes
TCONS_00009172	TCONS_00009172	j	XLOC_001565	AGAP004753	AGAP004753-RB	TSS2240	2L:3057930-3061847	909	-	Res	Sus	OK	0	0	0	0.866906	0.188963	1.54485	1.79769e+308	1.79769e+308	0.00527198	0.027666	yes
TCONS_00009174	TCONS_00009174	j	XLOC_001570	AGAP004767	AGAP004767-RA	TSS2247	2L:3189833-3213653	4843	-	Res	Sus	OK	0.372936	0.150819	0.595054	1.44798	0.88925	2.00671	1.35652	-3.82298	0.000131847	0.00149013	yes
TCONS_00009182	TCONS_00009182	j	XLOC_001577	AGAP004780	AGAP004780-RA	TSS2262	2L:3452498-3461044	6876	-	Res	Sus	OK	0	0	0	0.969714	0.59446	1.34497	1.79769e+308	1.79769e+308	1.18113e-07	3.4354e-06	yes
TCONS_00009190	TCONS_00009190	j	XLOC_001585	AGAP004795	AGAP004795-RA	TSS2277	2L:3605332-3635049	3175	-	Res	Sus	OK	0	0	0	1.05275	0.549646	1.55586	1.79769e+308	1.79769e+308	1.42575e-05	0.000226861	yes
TCONS_00009196	TCONS_00009196	j	XLOC_001598	LIG_ANOGA	AGAP004817-RA	TSS2296	2L:3843007-3856078	3513	-	Res	Sus	OK	0	0	0	1.85513	1.13786	2.5724	1.79769e+308	1.79769e+308	1.15343e-07	3.36593e-06	yes
TCONS_00009197	TCONS_00009197	j	XLOC_001598	LIG_ANOGA	AGAP004817-RA	TSS2297	2L:3843007-3856078	5794	-	Res	Sus	OK	37.502	25.6629	49.3412	9.73337	6.70428	12.7625	-1.34884	6.08547	1.1615e-09	5.87719e-08	yes
TCONS_00009198	TCONS_00009198	j	XLOC_001598	LIG_ANOGA	AGAP004817-RA	TSS2298	2L:3843007-3856078	5799	-	Res	Sus	OK	1.70293	1.07725	2.32862	12.986	8.95274	17.0192	2.03152	-8.44534	0	0	yes
TCONS_00009204	TCONS_00009204	j	XLOC_001607	AGAP004834	AGAP004834-RB	TSS2313	2L:4242673-4252296	2941	-	Res	Sus	OK	0	0	0	0.483077	0.184119	0.782034	1.79769e+308	1.79769e+308	0.000615186	0.0052462	yes
TCONS_00009205	TCONS_00009205	j	XLOC_001607	AGAP004834	AGAP004834-RB	TSS2313	2L:4242673-4252296	2939	-	Res	Sus	OK	0	0	0	0.343145	0.0945392	0.59175	1.79769e+308	1.79769e+308	0.00288515	0.0178669	yes
TCONS_00009206	TCONS_00009206	j	XLOC_001607	AGAP004834	AGAP004834-RB	TSS2313	2L:4242673-4252296	2863	-	Res	Sus	OK	0	0	0	1.62303	0.93134	2.31472	1.79769e+308	1.79769e+308	1.34649e-06	2.94261e-05	yes
TCONS_00009208	TCONS_00009208	j	XLOC_001612	AGAP004841	AGAP004841-RA	TSS2320	2L:4379721-4392490	5749	-	Res	Sus	OK	0	0	0	1.27143	0.784854	1.758	1.79769e+308	1.79769e+308	8.65828e-08	2.60593e-06	yes
TCONS_00009213	TCONS_00009213	j	XLOC_001615	GPRSTN	AGAP004850-RA	TSS2325	2L:4444970-4462188	12949	-	Res	Sus	OK	0.996175	0.64155	1.3508	0.353307	0.199978	0.506636	-1.03659	3.69346	0.00022122	0.00229182	yes
TCONS_00009216	TCONS_00009216	j	XLOC_001617	AGAP004852	AGAP004852-RB	TSS2329	2L:4465394-4475550	5293	-	Res	Sus	OK	9.43258	6.46814	12.397	33.7827	23.113	44.4524	1.27578	-5.72668	1.02415e-08	4.00252e-07	yes
TCONS_00009218	TCONS_00009218	j	XLOC_001624	AGAP004864	AGAP004864-RA	TSS2337	2L:4582892-4592843	5260	-	Res	Sus	OK	0.5948	0.31026	0.87934	1.44358	0.908877	1.97829	0.886659	-2.93103	0.00337845	0.0200791	yes
TCONS_00009220	TCONS_00009220	j	XLOC_001627	AGAP004866	AGAP004866-RA	TSS2344	2L:4666860-4676547	8131	-	Res	Sus	OK	0.908125	0.549258	1.26699	2.37072	1.58567	3.15577	0.959568	-3.72232	0.0001974	0.0020852	yes
TCONS_00009222	TCONS_00009222	j	XLOC_001627	AGAP004866	AGAP004866-RA	TSS2344	2L:4666860-4676547	8409	-	Res	Sus	OK	4.42079	3.00621	5.83538	2.36759	1.58225	3.15294	-0.624445	2.70974	0.0067336	0.0328731	yes
TCONS_00009224	TCONS_00009224	j	XLOC_001631	AGAP004873	AGAP004873-RA	TSS2349	2L:4768420-4817307	6900	-	Res	Sus	OK	0	0	0	0.514975	0.283078	0.746872	1.79769e+308	1.79769e+308	4.46868e-06	8.42614e-05	yes
TCONS_00009225	TCONS_00009225	j	XLOC_001631	AGAP004873	AGAP004873-RA	TSS2349	2L:4768420-4817307	6562	-	Res	Sus	OK	0.122564	0.0216124	0.223516	1.73924	1.13554	2.34295	2.65257	-5.93538	2.93164e-09	1.31323e-07	yes
TCONS_00009232	TCONS_00009232	j	XLOC_001637	AGAP004886	AGAP004886-RB	TSS2365	2L:4954505-4968464	2555	-	Res	Sus	OK	0.557598	0.185883	0.929313	2.42225	1.4546	3.38991	1.46881	-3.77991	0.000156888	0.00172327	yes
TCONS_00009233	TCONS_00009233	j	XLOC_001637	AGAP004886	AGAP004886-RB	TSS2366	2L:4954505-4968464	2917	-	Res	Sus	OK	0.374044	0.0898163	0.658271	8.35695	5.63817	11.0757	3.10648	-7.51635	5.63993e-14	6.78067e-12	yes
TCONS_00009237	TCONS_00009237	j	XLOC_001651	AGAP004910	AGAP004910-RA	TSS2384	2L:5815576-5819743	1370	-	Res	Sus	OK	0	0	0	0.514031	0.0713182	0.956744	1.79769e+308	1.79769e+308	0.0101114	0.0437356	yes
TCONS_00009241	TCONS_00009241	j	XLOC_001664	AGAP004937	AGAP004937-RA	TSS2397	2L:6209534-6223303	11766	-	Res	Sus	OK	0.390972	0.219236	0.562707	0.149984	0.0658651	0.234102	-0.958109	2.68985	0.00714842	0.0343322	yes
TCONS_00009244	TCONS_00009244	j	XLOC_001667	AGAP004942	AGAP004942-RA	TSS2401	2L:6371583-6437218	7549	-	Res	Sus	OK	1.24206	0.782937	1.70119	6.87422	4.73097	9.01746	1.711	-7.07645	1.47904e-12	1.39742e-10	yes
TCONS_00009255	TCONS_00009255	j	XLOC_001706	AGAP005008	AGAP005008-RB	TSS2450	2L:7820592-7917012	2129	-	Res	Sus	OK	0.774298	0.312073	1.23652	2.38921	1.40691	3.37151	1.12676	-3.10898	0.00187734	0.0128804	yes
TCONS_00009257	TCONS_00009257	j	XLOC_001708	AGAP005015	AGAP005015-RA	TSS2453	2L:8300315-8324181	3598	-	Res	Sus	OK	0.467181	0.187614	0.746749	7.13293	4.83316	9.43271	2.72576	-8.01997	1.11022e-15	1.77487e-13	yes
TCONS_00009260	TCONS_00009260	j	XLOC_001716	AGAP005030	AGAP005030-RA	TSS2461	2L:8584077-8603598	12721	-	Res	Sus	OK	8.14678	5.60674	10.6868	4.64918	3.20539	6.09297	-0.560932	2.54937	0.0107917	0.0453791	yes
TCONS_00009268	TCONS_00009268	j	XLOC_001722	AGAP005039	AGAP005039-RA	TSS2477	2L:8664634-8707939	4387	-	Res	Sus	OK	4.37084	2.87652	5.86517	2.00711	1.23921	2.775	-0.778261	3.03364	0.00241624	0.015607	yes
TCONS_00009270	TCONS_00009270	j	XLOC_001726	AGAP005043	AGAP005043-RB	TSS2481	2L:8767477-8779578	6409	-	Res	Sus	OK	0	0	0	1.0301	0.641737	1.41846	1.79769e+308	1.79769e+308	5.63898e-08	1.78742e-06	yes
TCONS_00009271	TCONS_00009271	j	XLOC_001726	AGAP005043	AGAP005043-RB	TSS2481	2L:8767477-8779578	6040	-	Res	Sus	OK	0.284104	0.122506	0.445703	1.48994	0.959331	2.02055	1.65715	-4.93869	7.86475e-07	1.84191e-05	yes
TCONS_00009274	TCONS_00009274	j	XLOC_001733	AGAP005056	AGAP005056-RA	TSS2494	2L:8887794-8889559	1594	-	Res	Sus	OK	9.40774	6.10526	12.7102	4.81465	2.93655	6.69275	-0.66987	2.55297	0.0106809	0.0450203	yes
TCONS_00009277	TCONS_00009277	j	XLOC_001738	AGAP005068	AGAP005068-RA	TSS2501	2L:9316387-9332298	3266	-	Res	Sus	OK	0.0839834	0	0.200473	0.716524	0.34479	1.08826	2.14379	-2.89525	0.00378851	0.0218282	yes
TCONS_00009289	TCONS_00009289	j	XLOC_001771	AGAP005127	AGAP005127-RA	TSS2540	2L:10330517-10336460	4916	-	Res	Sus	OK	0.282904	0.0901496	0.475658	7.58886	5.17725	10.0005	3.28933	-8.75047	0	0	yes
TCONS_00009292	TCONS_00009292	j	XLOC_001780	AGAP005143	AGAP005143-RA	TSS2551	2L:10472271-10560094	9776	-	Res	Sus	OK	0.443989	0.235316	0.652662	2.32242	1.55127	3.09356	1.65456	-5.75044	8.90121e-09	3.54146e-07	yes
TCONS_00009294	TCONS_00009294	j	XLOC_001781	AGAP005147	AGAP005147-RB	TSS2556	2L:10565294-10575499	1898	-	Res	Sus	OK	0	0	0	1.12874	0.494672	1.76281	1.79769e+308	1.79769e+308	0.000185209	0.00197677	yes
TCONS_00009297	TCONS_00009297	j	XLOC_001784	AGAP005156	AGAP005156-RA	TSS2563	2L:10649038-10759904	3104	-	Res	Sus	OK	0.0642935	0	0.168399	2.24843	1.34987	3.14698	3.55453	-4.26252	2.02133e-05	0.000306801	yes
TCONS_00009301	TCONS_00009301	j	XLOC_001787	AGAP005160	AGAP005160-RD	TSS2569	2L:10778204-10811531	4025	-	Res	Sus	OK	17.5675	12.1245	23.0104	9.79881	6.73587	12.8618	-0.583787	2.65287	0.00798116	0.0370064	yes
TCONS_00009302	TCONS_00009302	j	XLOC_001787	AGAP005160	AGAP005160-RD	TSS2569	2L:10778204-10811531	4022	-	Res	Sus	OK	2.47545	1.59021	3.36068	7.10367	4.84267	9.36466	1.05419	-4.40406	1.06244e-05	0.000176899	yes
TCONS_00009308	TCONS_00009308	j	XLOC_001790	AGAP005164	AGAP005164-RA	TSS2578	2L:11053066-11119388	2963	-	Res	Sus	OK	0	0	0	2.57829	1.59551	3.56107	1.79769e+308	1.79769e+308	7.73235e-08	2.34807e-06	yes
TCONS_00009311	TCONS_00009311	j	XLOC_001791	AGAP005165	AGAP005165-RA	TSS2581	2L:11130783-11260999	1382	-	Res	Sus	OK	0	0	0	0.456364	0.0937682	0.81896	1.79769e+308	1.79769e+308	0.00591451	0.0301033	yes
TCONS_00009313	TCONS_00009313	j	XLOC_001791	AGAP005165	AGAP005165-RA	TSS2582	2L:11130783-11260999	6533	-	Res	Sus	OK	0.558247	0.306123	0.810371	1.2119	0.768499	1.65529	0.77514	-2.66721	0.00764838	0.0359201	yes
TCONS_00009314	TCONS_00009314	j	XLOC_001792	AGAP005170	AGAP005170-RA	TSS2585	2L:11283755-11334904	3349	-	Res	Sus	OK	2.79385	1.74134	3.84637	8.18042	5.53499	10.8258	1.07432	-4.32768	1.50688e-05	0.000238053	yes
TCONS_00009320	TCONS_00009320	j	XLOC_001809	PGRPLC	AGAP005203-RC	TSS2607	2L:12198710-12208633	1268	-	Res	Sus	OK	0.956999	0.296616	1.61738	4.58767	2.75564	6.4197	1.56732	-3.93171	8.43455e-05	0.00102664	yes
TCONS_00009323	TCONS_00009323	j	XLOC_001810	PGRPLA	AGAP005205-RC	TSS2609	2L:12211357-12220968	1536	-	Res	Sus	OK	3.77793	2.16903	5.38684	9.22548	6.02303	12.4279	0.892792	-3.24993	0.00115434	0.00875284	yes
TCONS_00009324	TCONS_00009324	j	XLOC_001810	PGRPLA	AGAP005205-RC	TSS2609	2L:12211357-12220968	1609	-	Res	Sus	OK	0.719352	0.181422	1.25728	2.58523	1.41753	3.75293	1.27922	-2.92854	0.00340559	0.020205	yes
TCONS_00009326	TCONS_00009326	j	XLOC_001814	AGAP005213	AGAP005213-RA	TSS2619	2L:12366345-12408201	8748	-	Res	Sus	OK	0.135687	0.0369529	0.234422	0.727937	0.436987	1.01889	1.67986	-4.04685	5.19119e-05	0.000689912	yes
TCONS_00009327	TCONS_00009327	j	XLOC_001814	AGAP005213	AGAP005213-RA	TSS2621	2L:12366345-12408201	4874	-	Res	Sus	OK	0	0	0	0.833848	0.454317	1.21338	1.79769e+308	1.79769e+308	5.56174e-06	0.000101531	yes
TCONS_00009328	TCONS_00009328	j	XLOC_001818	AGAP005218	AGAP005218-RA	TSS2624	2L:12430209-12431932	1399	-	Res	Sus	OK	0.21218	0	0.492325	3.24469	1.87626	4.61313	2.72734	-3.93544	8.30434e-05	0.00101443	yes
TCONS_00009330	TCONS_00009330	j	XLOC_001825	AGAP005230	AGAP005230-RA	TSS2631	2L:12594128-12609112	3692	-	Res	Sus	OK	0.222254	0.0249947	0.419513	1.18088	0.658956	1.7028	1.67019	-3.36902	0.000754351	0.00619934	yes
TCONS_00009331	TCONS_00009331	j	XLOC_001831	AGAP005239	AGAP005239-RA	TSS2638	2L:12704417-12709271	3178	-	Res	Sus	OK	0.29537	0.0604383	0.530302	1.36952	0.778753	1.96029	1.53399	-3.39068	0.000697198	0.00581411	yes
TCONS_00009334	TCONS_00009334	j	XLOC_001832	AGAP005243	AGAP005243-RA	TSS2640	2L:12718546-12767586	6380	-	Res	Sus	OK	5.09591	3.45206	6.73977	2.43771	1.61197	3.26345	-0.737378	3.15279	0.00161719	0.0114756	yes
TCONS_00009336	TCONS_00009336	j	XLOC_001833	AGAP005244	AGAP005244-RB	TSS2644	2L:12776812-12857673	9905	-	Res	Sus	OK	0.289546	0.144743	0.43435	2.97451	2.02197	3.92705	2.32952	-7.84553	4.21885e-15	6.1233e-13	yes
TCONS_00009346	TCONS_00009346	j	XLOC_001839	AGAP005255	AGAP005255-RA	TSS2654	2L:13240823-13250638	4174	-	Res	Sus	OK	1.3302	0.767613	1.89278	10.0974	6.91605	13.2787	2.02695	-7.68676	1.5099e-14	1.95371e-12	yes
TCONS_00009347	TCONS_00009347	j	XLOC_001839	AGAP005255	AGAP005255-RA	TSS2653	2L:13240823-13250638	4223	-	Res	Sus	OK	1.17726	0.664203	1.69032	5.38892	3.62896	7.14888	1.52115	-5.58631	2.31946e-08	8.18078e-07	yes
TCONS_00009348	TCONS_00009348	j	XLOC_001841	AGAP005259	AGAP005259-RA	TSS2656	2L:13341029-13348416	6561	-	Res	Sus	OK	0.292184	0.128651	0.455718	1.06391	0.661343	1.46648	1.29232	-3.82571	0.000130393	0.00147484	yes
TCONS_00009356	TCONS_00009356	j	XLOC_001860	AGAP005308	AGAP005308-RA	TSS2682	2L:13949645-13952365	1650	-	Res	Sus	OK	0.198758	0	0.458361	1.25572	0.575121	1.93632	1.84338	-2.6071	0.00913124	0.0406803	yes
TCONS_00009363	TCONS_00009363	j	XLOC_001881	AGAP005347	AGAP005347-RA	TSS2706	2L:14376619-14380716	3582	-	Res	Sus	OK	0.856994	0.431658	1.28233	2.76615	1.77149	3.7608	1.17178	-3.82384	0.000131391	0.00148574	yes
TCONS_00009368	TCONS_00009368	j	XLOC_001889	AGAP005369	AGAP005369-RB	TSS2720	2L:14698418-14706996	3203	-	Res	Sus	OK	1.89442	1.1382	2.65063	4.88227	3.25232	6.51222	0.946699	-3.63846	0.000274276	0.00272995	yes
TCONS_00009370	TCONS_00009370	j	XLOC_001895	AGAP005378	AGAP005378-RA	TSS2726	2L:14731452-14828550	6810	-	Res	Sus	OK	7.71445	5.29906	10.1298	15.3521	10.5844	20.1198	0.688156	-3.12092	0.00180286	0.0124546	yes
TCONS_00009372	TCONS_00009372	j	XLOC_001903	AGAP005390	AGAP005390-RB	TSS2737	2L:14856792-14866347	2083	-	Res	Sus	OK	0	0	0	0.606068	0.212551	0.999585	1.79769e+308	1.79769e+308	0.00103409	0.00802022	yes
TCONS_00009377	TCONS_00009377	j	XLOC_001911	AGAP005408	AGAP005408-RA	TSS2746	2L:15186956-15209273	4254	-	Res	Sus	OK	0.204202	0.0301281	0.378277	5.81314	3.92354	7.70273	3.34876	-7.34111	2.11831e-13	2.32502e-11	yes
TCONS_00009380	TCONS_00009380	j	XLOC_001921	AGAP005425	AGAP005425-RA	TSS2761	2L:15380484-15420263	3581	-	Res	Sus	OK	0	0	0	0.39816	0.167659	0.62866	1.79769e+308	1.79769e+308	0.000275407	0.00273936	yes
TCONS_00009381	TCONS_00009381	j	XLOC_001921	AGAP005425	AGAP005425-RA	TSS2762	2L:15380484-15420263	6010	-	Res	Sus	OK	0.336658	0.153203	0.520113	2.48308	1.65319	3.31298	1.99819	-6.25159	4.06293e-10	2.30719e-08	yes
TCONS_00009383	TCONS_00009383	j	XLOC_001921	AGAP005425	AGAP005425-RA	TSS2760	2L:15380484-15420263	1862	-	Res	Sus	OK	0	0	0	0.770671	0.305868	1.23547	1.79769e+308	1.79769e+308	0.000456382	0.00413915	yes
TCONS_00009388	TCONS_00009388	j	XLOC_001935	AGAP005448	AGAP005448-RA	TSS2775	2L:15548563-15557299	4909	-	Res	Sus	OK	0.0529551	0	0.133111	0.774094	0.404877	1.14331	2.68225	-3.38021	0.000724316	0.0059882	yes
TCONS_00009390	TCONS_00009390	j	XLOC_001936	AGAP005449	AGAP005449-RB	TSS2777	2L:15557429-15634847	5690	-	Res	Sus	OK	0	0	0	0.442855	0.218843	0.666866	1.79769e+308	1.79769e+308	3.845e-05	0.000533836	yes
TCONS_00009396	TCONS_00009396	j	XLOC_001947	AGAP005472	AGAP005472-RA	TSS2790	2L:16000528-16067300	7291	-	Res	Sus	OK	0	0	0	0.609842	0.351516	0.868167	1.79769e+308	1.79769e+308	1.17054e-06	2.59537e-05	yes
TCONS_00009401	TCONS_00009401	j	XLOC_001966	AGAP005505	AGAP005505-RA	TSS2818	2L:16282516-16291143	4481	-	Res	Sus	OK	0.571427	0.261911	0.880943	2.23675	1.41852	3.05497	1.36464	-4.1757	2.97074e-05	0.00042822	yes
TCONS_00009402	TCONS_00009402	j	XLOC_001966	AGAP005505	AGAP005505-RA	TSS2817	2L:16282516-16291143	5553	-	Res	Sus	OK	8.96379	6.13619	11.7914	3.83285	2.5631	5.1026	-0.849585	3.7145	0.000203605	0.00213744	yes
TCONS_00009403	TCONS_00009403	j	XLOC_001967	AGAP005508	AGAP005508-RC	TSS2819	2L:16385118-16465079	4577	-	Res	Sus	OK	0.259136	0.0808205	0.437451	4.93248	3.32952	6.53544	2.94625	-7.74313	9.76996e-15	1.31027e-12	yes
TCONS_00009404	TCONS_00009404	j	XLOC_001967	AGAP005508	AGAP005508-RC	TSS2820	2L:16385118-16465079	10206	-	Res	Sus	OK	6.98115	4.8148	9.14751	3.80962	2.60501	5.01424	-0.605684	2.73425	0.00625229	0.0312247	yes
TCONS_00009409	TCONS_00009409	j	XLOC_001968	AGAP005510	AGAP005510-RA	TSS2827	2L:16486934-16537376	1461	-	Res	Sus	OK	0	0	0	1.65548	0.792695	2.51826	1.79769e+308	1.79769e+308	6.21396e-05	0.00079819	yes
TCONS_00009410	TCONS_00009410	j	XLOC_001970	AGAP005515	AGAP005515-RA	TSS2829	2L:16540114-16550958	2330	-	Res	Sus	OK	2.83623	1.66504	4.00742	6.29546	4.11746	8.47347	0.797354	-2.96023	0.00307411	0.0187192	yes
TCONS_00009415	TCONS_00009415	j	XLOC_001980	AGAP005533	AGAP005533-RA	TSS2848	2L:16670704-16684435	6064	-	Res	Sus	OK	0.218231	0.0641438	0.372318	0.980982	0.577393	1.38457	1.503	-3.67846	0.000234651	0.00240165	yes
TCONS_00009421	TCONS_00009421	j	XLOC_001989	AGAP005550	AGAP005550-RA	TSS2858	2L:16966463-16971104	3422	-	Res	Sus	OK	0.294786	0.080251	0.509321	1.58653	0.957195	2.21586	1.68305	-4.06118	4.88257e-05	0.000655411	yes
TCONS_00009422	TCONS_00009422	j	XLOC_001989	AGAP005550	AGAP005550-RA	TSS2858	2L:16966463-16971104	3307	-	Res	Sus	OK	0.263746	0.0574674	0.470025	1.29627	0.75281	1.83973	1.59226	-3.58862	0.00033243	0.00320328	yes
TCONS_00009423	TCONS_00009423	j	XLOC_001991	AGAP005555	AGAP005555-RA	TSS2861	2L:17000031-17004739	3243	-	Res	Sus	OK	4.51047	2.95824	6.06271	1.64798	0.977869	2.31809	-1.00685	3.78013	0.000156745	0.00172341	yes
TCONS_00009425	TCONS_00009425	j	XLOC_001992	AGAP005556	AGAP005556-RB	TSS2862	2L:17005124-17022895	1335	-	Res	Sus	OK	15.7479	10.5132	20.9827	6.54762	4.1045	8.99075	-0.877606	3.51237	0.000444133	0.00404886	yes
TCONS_00009427	TCONS_00009427	j	XLOC_001992	AGAP005556	AGAP005556-RB	TSS2864	2L:17005124-17022895	2413	-	Res	Sus	OK	0.376376	0.0673687	0.685384	2.36663	1.4019	3.33135	1.83863	-4.01169	6.02851e-05	0.000780734	yes
TCONS_00009428	TCONS_00009428	j	XLOC_001994	AGAP005562	AGAP005562-RA	TSS2868	2L:17045941-17082960	914	-	Res	Sus	OK	0	0	0	2.12624	0.916477	3.33601	1.79769e+308	1.79769e+308	0.000219766	0.00228266	yes
TCONS_00009432	TCONS_00009432	j	XLOC_001995	AGAP005564	AGAP005564-RC	TSS2872	2L:17097348-17247245	7540	-	Res	Sus	OK	0.936655	0.558518	1.31479	0.204656	0.0788771	0.330434	-1.52099	4.13692	3.51994e-05	0.000493832	yes
TCONS_00009444	TCONS_00009444	j	XLOC_002026	AGAP005614	AGAP005614-RA	TSS2900	2L:17864581-17867434	622	-	Res	Sus	OK	1.44918	0.236276	2.66209	5.33169	2.81496	7.84842	1.30267	-2.71137	0.00670054	0.0327443	yes
TCONS_00009445	TCONS_00009445	j	XLOC_002026	AGAP005614	AGAP005614-RA	TSS2901	2L:17864581-17867434	727	-	Res	Sus	OK	0.470194	0	1.07904	2.86897	1.30262	4.43532	1.80856	-2.57397	0.0100538	0.043563	yes
TCONS_00009449	TCONS_00009449	j	XLOC_002037	AGAP005635	AGAP005635-RB	TSS2914	2L:18059003-18067877	1933	-	Res	Sus	OK	0.254135	0	0.530353	2.76141	1.6273	3.89552	2.38563	-4.10643	4.01829e-05	0.00055354	yes
TCONS_00009450	TCONS_00009450	j	XLOC_002037	AGAP005635	AGAP005635-RB	TSS2915	2L:18059003-18067877	3784	-	Res	Sus	OK	1.12732	0.625154	1.62948	3.44878	2.26755	4.63	1.11818	-3.97997	6.89238e-05	0.000871882	yes
TCONS_00009452	TCONS_00009452	j	XLOC_002049	AGAP005661	AGAP005661-RB	TSS2932	2L:18357219-18482962	9695	-	Res	Sus	OK	3.26258	2.21982	4.30534	1.7807	1.19299	2.3684	-0.605513	2.63591	0.00839116	0.0384708	yes
TCONS_00009453	TCONS_00009453	j	XLOC_002049	AGAP005661	AGAP005661-RB	TSS2933	2L:18357219-18482962	11443	-	Res	Sus	OK	0.593086	0.361012	0.825159	3.23241	2.21491	4.24992	1.69565	-6.75291	1.44906e-11	1.12367e-09	yes
TCONS_00009454	TCONS_00009454	j	XLOC_002049	AGAP005661	AGAP005661-RB	TSS2933	2L:18357219-18482962	11311	-	Res	Sus	OK	3.61493	2.47713	4.75274	1.1664	0.770817	1.56199	-1.13115	4.88934	1.01174e-06	2.28811e-05	yes
TCONS_00009455	TCONS_00009455	j	XLOC_002057	AGAP005674	AGAP005674-RA	TSS2940	2L:18548555-18710890	4339	-	Res	Sus	OK	0	0	0	0.893261	0.50279	1.28373	1.79769e+308	1.79769e+308	2.37768e-06	4.87276e-05	yes
TCONS_00009456	TCONS_00009456	j	XLOC_002057	AGAP005674	AGAP005674-RA	TSS2941	2L:18548555-18710890	4377	-	Res	Sus	OK	4.29259	2.86395	5.72123	8.31349	5.68861	10.9384	0.660989	-2.88167	0.00395576	0.0225417	yes
TCONS_00009458	TCONS_00009458	j	XLOC_002061	AGAP005680	AGAP005680-RA	TSS2946	2L:18548555-18710890	1621	-	Res	Sus	OK	0	0	0	0.915006	0.349529	1.48048	1.79769e+308	1.79769e+308	0.0006056	0.00518048	yes
TCONS_00009461	TCONS_00009461	j	XLOC_002062	GPRNNA21	AGAP005681-RA	TSS2948	2L:18548555-18710890	6672	-	Res	Sus	OK	6.80029	4.65034	8.95024	3.14551	2.11268	4.17834	-0.770989	3.38289	0.000717276	0.00594559	yes
TCONS_00009462	TCONS_00009462	j	XLOC_002062	GPRNNA21	AGAP005681-RA	TSS2949	2L:18548555-18710890	7780	-	Res	Sus	OK	14.256	9.84092	18.671	6.52078	4.48376	8.5578	-0.78218	3.55629	0.000376132	0.00354692	yes
TCONS_00009465	TCONS_00009465	j	XLOC_002071	AGAP005701	AGAP005701-RA	TSS2956	2L:19150893-19175228	1843	-	Res	Sus	OK	5.25552	3.3463	7.16473	11.4639	7.73124	15.1966	0.779929	-3.19747	0.00138638	0.010158	yes
TCONS_00009466	TCONS_00009466	j	XLOC_002083	AGAP005721	AGAP005721-RA	TSS2973	2L:19594787-19626507	3738	-	Res	Sus	OK	17.8357	12.3093	23.362	6.49214	4.39594	8.58834	-1.01061	4.51666	6.28231e-06	0.000112543	yes
TCONS_00009467	TCONS_00009467	j	XLOC_002083	AGAP005721	AGAP005721-RA	TSS2974	2L:19594787-19626507	3569	-	Res	Sus	OK	3.2761	2.1257	4.42649	6.13642	4.14657	8.12627	0.627589	-2.62606	0.00863807	0.0393087	yes
TCONS_00009468	TCONS_00009468	j	XLOC_002084	SCRB3	AGAP005725-RA	TSS2976	2L:19651932-19695694	4200	-	Res	Sus	OK	2.72651	1.72458	3.72845	15.2781	10.5273	20.0289	1.7234	-7.16012	8.06022e-13	7.95618e-11	yes
TCONS_00009473	TCONS_00009473	j	XLOC_002093	AGAP005745	AGAP005745-RA	TSS2991	2L:20169877-20173336	3196	-	Res	Sus	OK	0.194093	0.00926177	0.378925	1.14231	0.632365	1.65225	1.77246	-3.37058	0.000750088	0.0061712	yes
TCONS_00009474	TCONS_00009474	j	XLOC_002094	AGAP005746	AGAP005746-RA	TSS2992	2L:20175501-20178588	659	-	Res	Sus	OK	5.2578	2.7799	7.7357	1.8583	0.667178	3.04943	-1.04005	2.61456	0.00893433	0.0400782	yes
TCONS_00009475	TCONS_00009475	j	XLOC_002094	AGAP005746	AGAP005746-RA	TSS2993	2L:20175501-20178588	2356	-	Res	Sus	OK	0.232304	0	0.474772	1.15127	0.580097	1.72244	1.60057	-2.76997	0.0056062	0.0289584	yes
TCONS_00009479	TCONS_00009479	j	XLOC_002100	AGAP005755	AGAP005755-RB	TSS3001	2L:20213366-20280333	2269	-	Res	Sus	OK	0.296954	0	0.597395	1.50258	0.772247	2.23292	1.62136	-2.889	0.00386471	0.0221602	yes
TCONS_00009482	TCONS_00009482	j	XLOC_002109	AGAP005771	AGAP005771-RA	TSS3014	2L:20414838-20427458	8283	-	Res	Sus	OK	0.433068	0.225371	0.640764	3.46398	2.34718	4.58077	2.07928	-7.19614	6.19504e-13	6.19828e-11	yes
TCONS_00009488	TCONS_00009488	j	XLOC_002125	AGAP005796	AGAP005796-RA	TSS3034	2L:20951960-21034999	4903	-	Res	Sus	OK	0.971234	0.549011	1.39346	0.360612	0.158465	0.562759	-0.990765	2.79331	0.00521712	0.0276179	yes
TCONS_00009491	TCONS_00009491	j	XLOC_002129	AGAP005803	AGAP005803-RA	TSS3040	2L:21200855-21236707	3600	-	Res	Sus	OK	1.30596	0.754123	1.8578	3.37388	2.22398	4.52378	0.949125	-3.49667	0.000471107	0.00423958	yes
TCONS_00009492	TCONS_00009492	j	XLOC_002129	AGAP005803	AGAP005803-RA	TSS3041	2L:21200855-21236707	5519	-	Res	Sus	OK	1.39761	0.868435	1.92678	4.24964	2.87497	5.6243	1.11207	-4.46623	7.96104e-06	0.000138076	yes
TCONS_00009500	TCONS_00009500	j	XLOC_002155	AGAP005849	AGAP005849-RA	TSS3070	2L:22500897-22539696	3245	-	Res	Sus	OK	0.748067	0.364923	1.13121	2.05703	1.27388	2.84019	1.01153	-3.17003	0.00152422	0.0109354	yes
TCONS_00009503	TCONS_00009503	j	XLOC_002164	AGAP005863	AGAP005863-RA	TSS3080	2L:22645296-22649032	2665	-	Res	Sus	OK	0.119491	0	0.275127	3.07744	1.92934	4.22554	3.24861	-4.7955	1.62272e-06	3.47232e-05	yes
TCONS_00009504	TCONS_00009504	j	XLOC_002168	AGAP005870	AGAP005870-RB	TSS3084	2L:22686595-22707992	1498	-	Res	Sus	OK	0.667722	0.135602	1.19984	2.47349	1.32348	3.6235	1.30951	-2.83866	0.00453039	0.0249214	yes
TCONS_00009506	TCONS_00009506	j	XLOC_002168	AGAP005870	AGAP005870-RB	TSS3085	2L:22686595-22707992	1440	-	Res	Sus	OK	0	0	0	1.40736	0.623849	2.19086	1.79769e+308	1.79769e+308	0.00016379	0.00178795	yes
TCONS_00009509	TCONS_00009509	j	XLOC_002172	AGAP005881	AGAP005881-RA	TSS3089	2L:23123429-23131540	6792	-	Res	Sus	OK	0.653306	0.358634	0.947978	1.66478	1.07448	2.25508	0.935403	-3.26075	0.00111119	0.00849577	yes
TCONS_00009520	TCONS_00009520	j	XLOC_002194	AGAP005928	AGAP005928-RB	TSS3119	2L:23806193-23812328	1717	-	Res	Sus	OK	0	0	0	0.570451	0.173498	0.967404	1.79769e+308	1.79769e+308	0.00202559	0.0136222	yes
TCONS_00009521	TCONS_00009521	j	XLOC_002194	AGAP005928	AGAP005928-RB	TSS3120	2L:23806193-23812328	1757	-	Res	Sus	OK	0	0	0	0.410977	0.0713963	0.750557	1.79769e+308	1.79769e+308	0.00774965	0.0362683	yes
TCONS_00009522	TCONS_00009522	j	XLOC_002194	AGAP005928	AGAP005928-RB	TSS3120	2L:23806193-23812328	2165	-	Res	Sus	OK	0.31511	0.0348702	0.59535	1.21249	0.625926	1.79906	1.34751	-2.66201	0.0077676	0.0363138	yes
TCONS_00009526	TCONS_00009526	j	XLOC_002202	AGAP005939	AGAP005939-RA	TSS3128	2L:23867120-23870831	3444	-	Res	Sus	OK	0.0556021	0	0.140661	0.613502	0.293281	0.933723	2.40096	-2.9708	0.00297021	0.0182655	yes
TCONS_00009532	TCONS_00009532	j	XLOC_002211	AGAP005956	AGAP005956-RA	TSS3144	2L:24044446-24048146	2257	-	Res	Sus	OK	0.11721	0	0.282744	1.00564	0.472607	1.53867	2.14941	-2.84978	0.00437498	0.0243611	yes
TCONS_00009537	TCONS_00009537	j	XLOC_002215	AGAP005963	AGAP005963-RB	TSS3150	2L:24097198-24106657	5978	-	Res	Sus	OK	2.09458	1.35546	2.8337	4.21252	2.84961	5.57542	0.698708	-2.91893	0.0035124	0.0206968	yes
TCONS_00009538	TCONS_00009538	j	XLOC_002216	AGAP005964	AGAP005964-RB	TSS3154	2L:24107317-24320310	5515	-	Res	Sus	OK	0	0	0	0.272545	0.102187	0.442903	1.79769e+308	1.79769e+308	0.000687921	0.00574762	yes
TCONS_00009539	TCONS_00009539	j	XLOC_002216	AGAP005964	AGAP005964-RB	TSS3155	2L:24107317-24320310	6075	-	Res	Sus	OK	6.2411	4.24045	8.24175	0.924584	0.542497	1.30667	-1.90957	7.30226	2.82885e-13	3.02955e-11	yes
TCONS_00009540	TCONS_00009540	j	XLOC_002216	AGAP005964	AGAP005964-RB	TSS3156	2L:24107317-24320310	6345	-	Res	Sus	OK	0.40957	0.191595	0.627546	1.57734	1.0014	2.15329	1.34839	-4.17833	2.93662e-05	0.000423854	yes
TCONS_00009543	TCONS_00009543	j	XLOC_002220	AGAP005971	AGAP005971-RA	TSS3164	2L:24320897-24332805	3499	-	Res	Sus	OK	0	0	0	1.06833	0.582273	1.55439	1.79769e+308	1.79769e+308	5.51587e-06	0.000100819	yes
TCONS_00009544	TCONS_00009544	j	XLOC_002220	AGAP005971	AGAP005971-RA	TSS3164	2L:24320897-24332805	3684	-	Res	Sus	OK	5.27864	3.51221	7.04508	14.9117	10.257	19.5664	1.03848	-4.53856	5.66389e-06	0.000103012	yes
TCONS_00009545	TCONS_00009545	j	XLOC_002220	AGAP005971	AGAP005971-RA	TSS3165	2L:24320897-24332805	3989	-	Res	Sus	OK	3.83251	2.5105	5.15452	6.97094	4.71447	9.22741	0.59823	-2.5293	0.0114291	0.0471692	yes
TCONS_00009547	TCONS_00009547	j	XLOC_002221	AGAP005973	AGAP005973-RA	TSS3167	2L:24334288-24341677	1355	-	Res	Sus	OK	3.83617	2.22894	5.4434	1.66855	0.80873	2.52836	-0.832523	2.50709	0.0121731	0.0494399	yes
TCONS_00009548	TCONS_00009548	j	XLOC_002223	AGAP005978	AGAP005978-RB	TSS3171	2L:24428105-24443506	1486	-	Res	Sus	OK	0	0	0	1.87639	0.92629	2.8265	1.79769e+308	1.79769e+308	3.90972e-05	0.000540102	yes
TCONS_00009551	TCONS_00009551	j	XLOC_002225	AGAP005983	AGAP005983-RA	TSS3172	2L:24486976-24514966	2611	-	Res	Sus	OK	0.833177	0.36938	1.29697	0.0606761	0	0.157945	-2.6197	3.08747	0.00201868	0.0135923	yes
TCONS_00009552	TCONS_00009552	j	XLOC_002225	AGAP005983	AGAP005983-RA	TSS3173	2L:24486976-24514966	3600	-	Res	Sus	OK	4.82475	3.18163	6.46787	2.51075	1.5807	3.4408	-0.653176	2.59615	0.00942748	0.0416219	yes
TCONS_00009553	TCONS_00009553	j	XLOC_002228	AGAP005993	AGAP005993-RA	TSS3179	2L:24575616-24594971	3741	-	Res	Sus	OK	2.77095	1.72741	3.81449	8.55938	5.80551	11.3132	1.12784	-4.55398	5.26413e-06	9.69404e-05	yes
TCONS_00009581	TCONS_00009581	j	XLOC_002275	AGAP006068	AGAP006068-RC	TSS3252	2L:25980197-25997941	3951	-	Res	Sus	OK	0	0	0	3.4484	2.27578	4.62102	1.79769e+308	1.79769e+308	2.03258e-09	9.58157e-08	yes
TCONS_00009582	TCONS_00009582	j	XLOC_002275	AGAP006068	AGAP006068-RC	TSS3250	2L:25980197-25997941	4195	-	Res	Sus	OK	0.391972	0.15627	0.627675	3.18425	2.09355	4.27495	2.09478	-6.05394	1.41349e-09	6.97623e-08	yes
TCONS_00009583	TCONS_00009583	j	XLOC_002275	AGAP006068	AGAP006068-RC	TSS3253	2L:25980197-25997941	4116	-	Res	Sus	OK	1.11507	0.630493	1.59965	3.93086	2.61789	5.24383	1.25994	-4.59744	4.27706e-06	8.11337e-05	yes
TCONS_00009584	TCONS_00009584	j	XLOC_002277	AGAP006072	AGAP006072-RA	TSS3255	2L:26055401-26062518	2408	-	Res	Sus	OK	0.391588	0.0740027	0.709173	1.4279	0.759891	2.09591	1.29375	-2.76361	0.00571659	0.0293875	yes
TCONS_00009585	TCONS_00009585	j	XLOC_002277	AGAP006072	AGAP006072-RA	TSS3255	2L:26055401-26062518	3559	-	Res	Sus	OK	3.78341	2.46359	5.10322	7.79888	5.29277	10.305	0.723355	-3.05026	0.0022864	0.0149545	yes
TCONS_00009586	TCONS_00009586	j	XLOC_002289	AGAP006097	AGAP006097-RB	TSS3268	2L:26593490-26685356	2411	-	Res	Sus	OK	4.51624	2.90504	6.12743	1.77254	1.01068	2.53439	-0.935269	3.34874	0.00081179	0.00658793	yes
TCONS_00009587	TCONS_00009587	j	XLOC_002289	AGAP006097	AGAP006097-RB	TSS3269	2L:26593490-26685356	2433	-	Res	Sus	OK	0	0	0	4.23213	2.73019	5.73407	1.79769e+308	1.79769e+308	8.72548e-09	3.48096e-07	yes
TCONS_00009589	TCONS_00009589	j	XLOC_002289	AGAP006097	AGAP006097-RB	TSS3270	2L:26593490-26685356	1385	-	Res	Sus	OK	0	0	0	3.83542	2.25366	5.41719	1.79769e+308	1.79769e+308	6.18726e-07	1.48209e-05	yes
TCONS_00009598	TCONS_00009598	j	XLOC_002307	AGAP006141	AGAP006141-RB	TSS3297	2L:27091901-27101952	3946	-	Res	Sus	OK	0.335395	0.123678	0.547113	3.89189	2.60065	5.18314	2.45134	-6.8749	6.20326e-12	5.21346e-10	yes
TCONS_00009601	TCONS_00009601	j	XLOC_002312	AGAP006147	AGAP006147-RA	TSS3306	2L:27155132-27157320	1741	-	Res	Sus	OK	1.56693	0.71172	2.42213	5.37111	3.3272	7.41503	1.23192	-3.70307	0.000213007	0.00222187	yes
TCONS_00009603	TCONS_00009603	j	XLOC_002318	AGAP006159	AGAP006159-RA	TSS3312	2L:27430671-27436392	934	-	Res	Sus	OK	0	0	0	1.71078	0.670063	2.75149	1.79769e+308	1.79769e+308	0.000505047	0.00448464	yes
TCONS_00009604	TCONS_00009604	j	XLOC_002318	AGAP006159	AGAP006159-RA	TSS3314	2L:27430671-27436392	1535	-	Res	Sus	OK	0	0	0	0.921401	0.322925	1.51988	1.79769e+308	1.79769e+308	0.00103792	0.00803868	yes
TCONS_00009611	TCONS_00009611	j	XLOC_002328	AGAP006179	AGAP006179-RA	TSS3330	2L:27798851-27808355	1036	-	Res	Sus	OK	1.49444	0.557933	2.43095	24.3564	16.4678	32.2451	2.79104	-7.91325	2.44249e-15	3.71621e-13	yes
TCONS_00009612	TCONS_00009612	j	XLOC_002330	AGAP006183	AGAP006183-RA	TSS3332	2L:27821155-27852773	7044	-	Res	Sus	OK	1.25635	0.78606	1.72664	13.5963	9.37815	17.8146	2.38159	-9.79708	0	0	yes
TCONS_00009614	TCONS_00009614	j	XLOC_002330	AGAP006183	AGAP006183-RA	TSS3333	2L:27821155-27852773	7061	-	Res	Sus	OK	13.73	9.47113	17.9889	4.7333	3.23182	6.23477	-1.06496	4.80071	1.58106e-06	3.39966e-05	yes
TCONS_00009615	TCONS_00009615	j	XLOC_002331	AGAP006185	AGAP006185-RA	TSS3335	2L:27872529-27881968	2302	-	Res	Sus	OK	0.679474	0.234899	1.12405	1.94433	1.0758	2.81286	1.05136	-2.65414	0.00795097	0.0369052	yes
TCONS_00009618	TCONS_00009618	j	XLOC_002332	AGAP006188	AGAP006188-RB	TSS3339	2L:27934193-28207729	6394	-	Res	Sus	OK	1.23234	0.760547	1.70413	0.0268488	0	0.067903	-3.82645	4.85502	1.20373e-06	2.65826e-05	yes
TCONS_00009621	TCONS_00009621	j	XLOC_002348	AGAP006212	AGAP006212-RA	TSS3363	2L:28322905-28400870	869	-	Res	Sus	OK	0	0	0	1.14751	0.30346	1.99157	1.79769e+308	1.79769e+308	0.00327347	0.0196057	yes
TCONS_00009634	TCONS_00009634	j	XLOC_002366	AGAP006254	AGAP006254-RA	TSS3386	2L:28623745-28643670	3338	-	Res	Sus	OK	1.87278	1.10438	2.64118	4.77663	3.15937	6.39389	0.93631	-3.52025	0.000431143	0.00395825	yes
TCONS_00009636	TCONS_00009636	j	XLOC_002366	AGAP006254	AGAP006254-RC	TSS3388	2L:28623745-28643670	5069	-	Res	Sus	OK	0.36274	0.14735	0.578129	2.60353	1.70183	3.50523	1.97094	-5.73439	9.78635e-09	3.84509e-07	yes
TCONS_00009637	TCONS_00009637	j	XLOC_002371	AGAP006260	AGAP006260-RB	TSS3396	2L:28708089-28740943	2886	-	Res	Sus	OK	0.571872	0.206608	0.937137	1.89682	1.10231	2.69133	1.19902	-3.13957	0.00169197	0.0118462	yes
TCONS_00009638	TCONS_00009638	j	XLOC_002376	CTL6	AGAP006267-RA	TSS3403	2L:28797340-28888982	5155	-	Res	Sus	OK	20.0774	13.8832	26.2716	11.1428	7.66877	14.6169	-0.588798	2.68478	0.00725779	0.0347365	yes
TCONS_00009641	TCONS_00009641	j	XLOC_002378	AGAP006269	AGAP006269-RA	TSS3406	2L:28923091-28927176	3569	-	Res	Sus	OK	0.275149	0.0446714	0.505627	1.03118	0.541107	1.52126	1.32115	-2.7436	0.006077	0.0307108	yes
TCONS_00009648	TCONS_00009648	j	XLOC_002428	AGAP006339	AGAP006339-RA	TSS3424	2L:29778487-29904894	4048	-	Res	Sus	OK	0.468043	0.203742	0.732345	1.74351	1.08309	2.40393	1.31509	-3.8681	0.000109689	0.00127497	yes
TCONS_00009651	TCONS_00009651	j	XLOC_002433	AGAP006347	AGAP006347-RB	TSS3427	2L:30172541-30340529	5741	-	Res	Sus	OK	2.28669	1.49176	3.08162	4.87427	3.30817	6.44036	0.756864	-3.19775	0.00138504	0.0101515	yes
TCONS_00009656	TCONS_00009656	j	XLOC_002439	AGAP006366	AGAP006366-RD	TSS3437	2L:30513822-30536932	4777	-	Res	Sus	OK	33.8796	23.3172	44.4421	4.45668	2.99703	5.91633	-2.02841	8.97172	0	0	yes
TCONS_00009657	TCONS_00009657	j	XLOC_002442	AGAP006373	AGAP006373-RA	TSS3441	2L:30565902-30573614	4213	-	Res	Sus	OK	0.589566	0.289772	0.88936	2.87111	1.88648	3.85573	1.58307	-5.16215	2.44124e-07	6.48495e-06	yes
TCONS_00009660	TCONS_00009660	j	XLOC_002453	GPRGR14	AGAP006399-RA	TSS3452	2L:31084023-31089848	985	-	Res	Sus	OK	3.23873	1.58034	4.89713	17.2921	11.389	23.1952	1.67507	-5.44372	5.2179e-08	1.66471e-06	yes
TCONS_00009664	TCONS_00009664	j	XLOC_002462	AGAP006415	AGAP006415-RA	TSS3463	2L:31617985-31652568	1301	-	Res	Sus	OK	0.156838	0	0.405891	1.62191	0.705747	2.53808	2.33615	-2.77217	0.00556845	0.0288072	yes
TCONS_00009667	TCONS_00009667	j	XLOC_002468	AGAP006426	AGAP006426-RA	TSS3470	2L:31721336-31732721	1860	-	Res	Sus	OK	2.53963	1.41151	3.66775	5.89826	3.77897	8.01756	0.842638	-2.94973	0.00318053	0.0191714	yes
TCONS_00009668	TCONS_00009668	j	XLOC_002469	AGAP006427	AGAP006427-RB	TSS3472	2L:31735732-31752410	5668	-	Res	Sus	OK	0.608082	0.317759	0.898406	4.53655	3.07031	6.00279	2.00961	-6.97114	3.14393e-12	2.76885e-10	yes
TCONS_00009672	TCONS_00009672	j	XLOC_002481	AGAP006448	AGAP006448-RA	TSS3489	2L:32200033-32254165	4912	-	Res	Sus	OK	1.14433	0.673601	1.61506	3.81758	2.56274	5.07242	1.2048	-4.57616	4.73599e-06	8.83578e-05	yes
TCONS_00009676	TCONS_00009676	j	XLOC_002485	AGAP006454	AGAP006454-RA	TSS3498	2L:32298807-32352950	9202	-	Res	Sus	OK	0.645999	0.381546	0.910452	0.175187	0.0740448	0.276329	-1.30494	3.68761	0.00022637	0.00233695	yes
TCONS_00009680	TCONS_00009680	j	XLOC_002491	AGAP006475	AGAP006475-RA	TSS3505	2L:32679319-32695490	10763	-	Res	Sus	OK	1.94889	1.29605	2.60173	4.50332	3.08864	5.918	0.837556	-3.64762	0.000264685	0.00265787	yes
TCONS_00009687	TCONS_00009687	j	XLOC_002515	AGAP006508	AGAP006508-RB	TSS3526	2L:33175177-33203403	3344	-	Res	Sus	OK	0	0	0	1.24561	0.701042	1.79017	1.79769e+308	1.79769e+308	2.38461e-06	4.88242e-05	yes
TCONS_00009690	TCONS_00009690	j	XLOC_002518	AGAP006513	AGAP006513-RA	TSS3531	2L:33292938-33348295	6408	-	Res	Sus	OK	0	0	0	0.281927	0.122184	0.441671	1.79769e+308	1.79769e+308	0.000207982	0.00217356	yes
TCONS_00009707	TCONS_00009707	j	XLOC_002567	AGAP006592	AGAP006592-RA	TSS3602	2L:34425733-34441055	2311	-	Res	Sus	OK	0.983344	0.445424	1.52126	2.80599	1.69289	3.91909	1.04855	-3.1035	0.00191249	0.0130364	yes
TCONS_00009714	TCONS_00009714	j	XLOC_002586	AGAP006634	AGAP006634-RA	TSS3627	2L:34920604-35194216	7015	-	Res	Sus	OK	5.93538	4.05701	7.81375	2.61894	1.75562	3.48226	-0.818162	3.58084	0.000342493	0.00327734	yes
TCONS_00009720	TCONS_00009720	j	XLOC_002599	AGAP006656	AGAP006656-RA	TSS3641	2L:35818396-36415221	1904	-	Res	Sus	OK	3.5236	2.10759	4.93961	7.44493	4.88965	10.0002	0.748051	-2.83091	0.00464155	0.0253496	yes
TCONS_00009721	TCONS_00009721	j	XLOC_002599	AGAP006656	AGAP006656-RA	TSS3646	2L:35818396-36415221	893	-	Res	Sus	OK	0	0	0	1.0122	0.226497	1.79791	1.79769e+308	1.79769e+308	0.00498967	0.0267249	yes
TCONS_00009731	TCONS_00009731	j	XLOC_002626	AGAP006702	AGAP006702-RB	TSS3675	2L:37066036-37079246	6192	-	Res	Sus	OK	2.10706	1.35841	2.85572	0.953161	0.564614	1.34171	-0.793267	2.93394	0.00334691	0.0199238	yes
TCONS_00009733	TCONS_00009733	j	XLOC_002628	AGAP006705	AGAP006705-RA	TSS3680	2L:37094618-37108230	1903	-	Res	Sus	OK	0	0	0	0.54925	0.142867	0.955633	1.79769e+308	1.79769e+308	0.00343466	0.0203392	yes
TCONS_00009735	TCONS_00009735	j	XLOC_002635	AGAP006718	AGAP006718-RA	TSS3690	2L:37150322-37158486	2387	-	Res	Sus	OK	1.33737	0.649143	2.02561	4.16753	2.61344	5.72162	1.13662	-3.57697	0.000347605	0.0033205	yes
TCONS_00009736	TCONS_00009736	j	XLOC_002638	AGAP006721	AGAP006721-RB	TSS3694	2L:37168480-37246064	3592	-	Res	Sus	OK	2.83241	1.79205	3.87277	0.564409	0.25869	0.870128	-1.6131	4.92961	8.23933e-07	1.92148e-05	yes
TCONS_00009737	TCONS_00009737	j	XLOC_002638	AGAP006721	AGAP006721-RB	TSS3695	2L:37168480-37246064	4985	-	Res	Sus	OK	0.126202	0.0015162	0.250887	0.916221	0.522869	1.30957	1.98238	-3.6805	0.000232779	0.00239081	yes
TCONS_00009740	TCONS_00009740	j	XLOC_002641	COEAE3H	AGAP006725-RA	TSS3703	2L:37288437-37295468	2228	-	Res	Sus	OK	0.127654	0	0.302114	1.14266	0.561588	1.72374	2.1918	-3.00614	0.00264591	0.0167113	yes
TCONS_00009742	TCONS_00009742	j	XLOC_002644	AGAP006730	AGAP006730-RA	TSS3709	2L:37301684-37306159	4245	-	Res	Sus	OK	2.2581	1.4157	3.1005	4.60851	3.08304	6.13397	0.713381	-2.86074	0.00422657	0.0237052	yes
TCONS_00009745	TCONS_00009745	j	XLOC_002651	REL2	AGAP006747-RA	TSS3722	2L:37733103-37744887	3917	-	Res	Sus	OK	3.0946	2.00901	4.18018	15.3874	10.6223	20.1525	1.60389	-6.85522	7.12008e-12	5.89417e-10	yes
TCONS_00009746	TCONS_00009746	j	XLOC_002651	REL2	AGAP006747-RA	TSS3724	2L:37733103-37744887	3039	-	Res	Sus	OK	2.72619	1.6892	3.76319	10.5358	7.17747	13.8941	1.35187	-5.44801	5.09355e-08	1.63212e-06	yes
TCONS_00009748	TCONS_00009748	j	XLOC_002653	AGAP006754	AGAP006754-RA	TSS3727	2L:37748959-37873685	5476	-	Res	Sus	OK	0.893765	0.506044	1.28149	4.55526	3.07671	6.03381	1.62859	-6.01187	1.834e-09	8.75776e-08	yes
TCONS_00009751	TCONS_00009751	j	XLOC_002655	AGAP006756	AGAP006756-RA	TSS3733	2L:37882051-37888595	3259	-	Res	Sus	OK	0.783124	0.385	1.18125	9.84226	6.7105	12.974	2.53115	-8.44071	0	0	yes
TCONS_00009752	TCONS_00009752	j	XLOC_002658	GNBPA1	AGAP006761-RA	TSS3736	2L:37924153-37926560	1710	-	Res	Sus	OK	0.113498	0	0.289574	1.38245	0.662915	2.10199	2.49983	-3.0554	0.00224757	0.0147574	yes
TCONS_00009769	TCONS_00009769	j	XLOC_002712	AGAP006873	AGAP006873-RA	TSS3795	2L:39300238-39307966	3158	-	Res	Sus	OK	6.76534	4.54946	8.98123	3.46102	2.26369	4.65835	-0.670251	2.8138	0.0048959	0.0263538	yes
TCONS_00009772	TCONS_00009772	j	XLOC_002721	AGAP006898	AGAP006898-RA	TSS3805	2L:39572255-39606342	4931	-	Res	Sus	OK	5.4468	3.68302	7.21057	10.0536	6.91779	13.1894	0.612903	-2.7264	0.006403	0.0317866	yes
TCONS_00009775	TCONS_00009775	j	XLOC_002723	AGAP006901	AGAP006901-RC	TSS3810	2L:39704044-39750797	7226	-	Res	Sus	OK	7.61226	5.23613	9.9884	31.7581	21.6011	41.9152	1.42839	-6.39237	1.63335e-10	1.00514e-08	yes
TCONS_00009776	TCONS_00009776	j	XLOC_002724	AGAP006908	AGAP006908-RA	TSS3818	2L:39869645-39924073	1752	-	Res	Sus	OK	1.05331	0.412905	1.69371	3.18866	1.85569	4.52164	1.10767	-3.00246	0.00267805	0.0168613	yes
TCONS_00009785	TCONS_00009785	j	XLOC_002750	CLIPA10	AGAP006954-RA	TSS3849	2L:40219640-40224823	2862	-	Res	Sus	OK	0.123956	0	0.277093	0.897703	0.451612	1.34379	1.97991	-2.97373	0.00294203	0.0181453	yes
TCONS_00009791	TCONS_00009791	j	XLOC_002760	AGAP006975	AGAP006975-RA	TSS3862	2L:40441109-40443131	1871	-	Res	Sus	OK	0.281675	0	0.599732	2.94167	1.68487	4.19847	2.34598	-3.88637	0.000101756	0.00119696	yes
TCONS_00009796	TCONS_00009796	j	XLOC_002773	AGAP006992	AGAP006992-RA	TSS3883	2L:40500483-40508388	3602	-	Res	Sus	OK	0.312909	0.0723118	0.553506	1.40892	0.806934	2.0109	1.50467	-3.42108	0.00062372	0.00530769	yes
TCONS_00009797	TCONS_00009797	j	XLOC_002773	AGAP006992	AGAP006992-RA	TSS3884	2L:40500483-40508388	3693	-	Res	Sus	OK	0.274573	0.0517261	0.497421	3.21303	2.06644	4.35961	2.45975	-5.54872	2.87763e-08	9.92726e-07	yes
TCONS_00009803	TCONS_00009803	j	XLOC_002780	AGAP007006	AGAP007006-RC	TSS3895	2L:40730308-40772078	9356	-	Res	Sus	OK	0.515851	0.290382	0.741321	2.3836	1.60352	3.16368	1.53055	-5.60611	2.06926e-08	7.44108e-07	yes
TCONS_00009804	TCONS_00009804	j	XLOC_002781	AGAP007007	AGAP007007-RA	TSS3900	2L:40774336-40777747	2341	-	Res	Sus	OK	2.23574	1.27016	3.20131	0	0	0	-1.79769e+308	-1.79769e+308	1.82058e-06	3.84167e-05	yes
TCONS_00009805	TCONS_00009805	j	XLOC_002781	AGAP007007	AGAP007007-RA	TSS3901	2L:40774336-40777747	1585	-	Res	Sus	OK	0.57379	0.1082	1.03938	5.79712	3.66769	7.92655	2.31285	-5.19334	2.06552e-07	5.61189e-06	yes
TCONS_00009822	TCONS_00009822	j	XLOC_002804	AGAP007049	AGAP007049-RA	TSS3938	2L:41780835-41797297	858	-	Res	Sus	OK	4.20111	2.24024	6.16198	10.3182	6.54954	14.0869	0.898562	-3.03224	0.00242747	0.0156635	yes
TCONS_00009823	TCONS_00009823	j	XLOC_002806	AGAP007051	AGAP007051-RA	TSS3941	2L:41833571-41874573	3362	-	Res	Sus	OK	0.602265	0.25618	0.948351	11.0844	7.57593	14.5929	2.9126	-8.87923	0	0	yes
TCONS_00009824	TCONS_00009824	j	XLOC_002806	AGAP007051	AGAP007051-RA	TSS3941	2L:41833571-41874573	3387	-	Res	Sus	OK	1.32864	0.730173	1.9271	16.4594	11.3255	21.5932	2.51674	-9.18711	0	0	yes
TCONS_00009825	TCONS_00009825	j	XLOC_002810	AGAP007057	AGAP007057-RA	TSS3946	2L:41904857-41910306	3131	-	Res	Sus	OK	0.565681	0.230409	0.900953	3.35693	2.1589	4.55496	1.78075	-5.14787	2.63467e-07	6.96941e-06	yes
TCONS_00009830	TCONS_00009830	j	XLOC_002818	AGAP007065	AGAP007065-RA	TSS3960	2L:42134126-42150477	7974	-	Res	Sus	OK	1.82452	1.19219	2.45684	3.76652	2.55819	4.97485	0.724836	-3.06965	0.00214308	0.014243	yes
TCONS_00009837	TCONS_00009837	j	XLOC_002836	AGAP007093	AGAP007093-RA	TSS3986	2L:42465137-42561148	3585	-	Res	Sus	OK	3.36369	2.18625	4.54113	0.979596	0.544595	1.4146	-1.23365	4.36352	1.27985e-05	0.000207232	yes
TCONS_00009844	TCONS_00009844	j	XLOC_002846	AGAP007119	AGAP007119-RA	TSS4004	2L:43040488-43043142	1250	-	Res	Sus	OK	18.0285	12.0343	24.0228	7.20037	4.49652	9.90423	-0.917823	3.65989	0.000252321	0.00255231	yes
TCONS_00009853	TCONS_00009853	j	XLOC_002851	AGAP007135	AGAP007135-RA	TSS4020	2L:43341358-43386559	4843	-	Res	Sus	OK	1.06314	0.604853	1.52142	4.38085	2.93402	5.82768	1.41602	-5.21514	1.83677e-07	5.06839e-06	yes
TCONS_00009856	TCONS_00009856	j	XLOC_002865	AGAP007163	AGAP007163-RB	TSS4035	2L:43615324-43707631	6607	-	Res	Sus	OK	0.411544	0.196034	0.627054	1.00361	0.607321	1.3999	0.891445	-2.71844	0.00655913	0.0322784	yes
TCONS_00009866	TCONS_00009866	j	XLOC_002915	AGAP007253	AGAP007253-RB	TSS4078	2L:44665739-44695102	1954	-	Res	Sus	OK	0	0	0	3.21041	1.9137	4.50712	1.79769e+308	1.79769e+308	3.67987e-07	9.34755e-06	yes
TCONS_00009868	TCONS_00009868	j	XLOC_002915	AGAP007253	AGAP007253-RB	TSS4079	2L:44665739-44695102	6205	-	Res	Sus	OK	0.598607	0.317195	0.880019	5.57558	3.80106	7.35011	2.23155	-7.86152	3.77476e-15	5.53334e-13	yes
TCONS_00009873	TCONS_00009873	j	XLOC_002936	IAP1	AGAP007294-RA	TSS4104	2L:45036357-45062613	3648	-	Res	Sus	OK	3.88804	2.52486	5.25121	9.1819	6.24935	12.1144	0.85933	-3.6238	0.000290308	0.00286624	yes
TCONS_00009877	TCONS_00009877	j	XLOC_002946	AGAP007308	AGAP007308-RA	TSS4115	2L:45166996-45252700	3695	-	Res	Sus	OK	0	0	0	2.55918	1.62446	3.4939	1.79769e+308	1.79769e+308	2.17757e-08	7.76727e-07	yes
TCONS_00009884	TCONS_00009884	j	XLOC_002969	AGAP007349	AGAP007349-RA	TSS4143	2L:45991793-45998069	5020	-	Res	Sus	OK	0	0	0	0.257166	0.102519	0.411813	1.79769e+308	1.79769e+308	0.000440765	0.00402481	yes
TCONS_00009885	TCONS_00009885	j	XLOC_002969	AGAP007349	AGAP007349-RA	TSS4143	2L:45991793-45998069	5501	-	Res	Sus	OK	0	0	0	0.806057	0.471642	1.14047	1.79769e+308	1.79769e+308	7.1529e-07	1.69317e-05	yes
TCONS_00009886	TCONS_00009886	j	XLOC_002969	AGAP007349	AGAP007349-RA	TSS4144	2L:45991793-45998069	3266	-	Res	Sus	OK	0	0	0	0.409629	0.168952	0.650305	1.79769e+308	1.79769e+308	0.000332064	0.00320115	yes
TCONS_00009888	TCONS_00009888	j	XLOC_002974	AGAP007362	AGAP007362-RB	TSS4148	2L:46061684-46079319	1747	-	Res	Sus	OK	0.129244	0	0.311892	3.24189	1.96906	4.51473	3.22221	-4.39375	1.11409e-05	0.000184109	yes
TCONS_00009890	TCONS_00009890	j	XLOC_002975	AGAP007366	AGAP007366-RB	TSS4151	2L:46087325-46090357	733	-	Res	Sus	OK	3.06497	1.39188	4.73806	17.0986	11.1805	23.0167	1.71896	-5.31893	1.04382e-07	3.08275e-06	yes
TCONS_00009893	TCONS_00009893	j	XLOC_002978	AGAP007373	AGAP007373-RB	TSS4157	2L:46135108-46152665	1992	-	Res	Sus	OK	2.37014	1.34183	3.39845	26.5074	18.2115	34.8034	2.41448	-9.02676	0	0	yes
TCONS_00009894	TCONS_00009894	j	XLOC_002980	AGAP007375	AGAP007375-RA	TSS4161	2L:46156158-46178709	7189	-	Res	Sus	OK	0.271498	0.111368	0.431628	0.882027	0.529215	1.23484	1.17827	-3.30673	0.000943922	0.00744657	yes
TCONS_00009897	TCONS_00009897	j	XLOC_002981	AGAP007377	AGAP007377-RA	TSS4164	2L:46178967-46199890	3354	-	Res	Sus	OK	4.66272	3.05677	6.26866	2.40059	1.49444	3.30674	-0.663884	2.59842	0.00936535	0.0414387	yes
TCONS_00009905	TCONS_00009905	j	XLOC_003013	AGAP007474	AGAP007474-RA	TSS4201	2L:46751208-46791623	10968	-	Res	Sus	OK	2.35464	1.58371	3.12558	4.41409	3.02785	5.80033	0.628411	-2.7703	0.00560051	0.0289391	yes
TCONS_00009907	TCONS_00009907	j	XLOC_003022	AGAP007489	AGAP007489-RB	TSS4212	2L:46866897-46898248	2734	-	Res	Sus	OK	1.03763	0.519435	1.55583	3.08749	1.95281	4.22216	1.09042	-3.51717	0.000436176	0.00399282	yes
TCONS_00009908	TCONS_00009908	j	XLOC_003023	AGAP007490	AGAP007490-RA	TSS4213	2L:46866897-46898248	3102	-	Res	Sus	OK	0.993341	0.516134	1.47055	0.344372	0.112195	0.576549	-1.05935	2.55927	0.0104892	0.0448507	yes
TCONS_00009909	TCONS_00009909	j	XLOC_003028	AGAP007504	AGAP007504-RA	TSS4217	2L:46973435-46994721	5684	-	Res	Sus	OK	0	0	0	0.59714	0.314871	0.879408	1.79769e+308	1.79769e+308	1.16323e-05	0.000191156	yes
TCONS_00009913	TCONS_00009913	j	XLOC_003040	AGAP007521	AGAP007521-RB	TSS4227	2L:47132361-47142464	7313	-	Res	Sus	OK	3.54585	2.39642	4.69527	0.474569	0.261882	0.687255	-2.01113	7.27202	3.54161e-13	3.71179e-11	yes
TCONS_00009915	TCONS_00009915	j	XLOC_003045	AGAP007530	AGAP007530-RA	TSS4231	2L:47229458-47241165	4023	-	Res	Sus	OK	1.8211	1.10338	2.53883	3.62542	2.39074	4.86009	0.688528	-2.64374	0.00819951	0.037828	yes
TCONS_00009917	TCONS_00009917	j	XLOC_003047	AGAP007534	AGAP007534-RC	TSS4236	2L:47267063-47270270	1483	-	Res	Sus	OK	0.590196	0.103694	1.0767	2.25185	1.1933	3.3104	1.33905	-2.82225	0.00476873	0.0258808	yes
TCONS_00009921	TCONS_00009921	j	XLOC_003060	AGAP007573	AGAP007573-RA	TSS4249	2L:47769559-47786633	9262	-	Res	Sus	OK	0.36034	0.180918	0.539762	1.19708	0.766007	1.62815	1.20059	-3.90758	9.32244e-05	0.00111382	yes
TCONS_00009922	TCONS_00009922	j	XLOC_003060	AGAP007573	AGAP007573-RA	TSS4250	2L:47769559-47786633	15048	-	Res	Sus	OK	1.04398	0.683278	1.40469	0.149871	0.069602	0.23014	-1.94103	6.09081	1.12338e-09	5.7303e-08	yes
TCONS_00009928	TCONS_00009928	j	XLOC_003072	AGAP007592	AGAP007592-RA	TSS4270	2L:48055291-48085574	5401	-	Res	Sus	OK	1.14054	0.677275	1.6038	2.28926	1.49322	3.08531	0.696731	-2.60609	0.00915817	0.0407756	yes
TCONS_00009932	TCONS_00009932	j	XLOC_003075	AGAP007596	AGAP007596-RA	TSS4277	2L:48099811-48119441	6275	-	Res	Sus	OK	18.2071	12.5606	23.8535	8.33175	5.73935	10.9242	-0.781736	3.55897	0.000372315	0.00351996	yes
TCONS_00009933	TCONS_00009933	j	XLOC_003076	AGAP007599	AGAP007599-RA	TSS4279	2L:48133714-48138336	1466	-	Res	Sus	OK	6.22898	3.946	8.51195	12.9144	8.66826	17.1606	0.729134	-2.9617	0.00305946	0.0186557	yes
TCONS_00009934	TCONS_00009934	j	XLOC_003077	AGAP007600	AGAP007600-RA	TSS4280	2L:48138897-48146716	7054	-	Res	Sus	OK	0.325628	0.147494	0.503762	1.6132	1.04288	2.18352	1.60022	-4.91362	8.94115e-07	2.05903e-05	yes
TCONS_00009938	TCONS_00009938	j	XLOC_003086	AGAP007620	AGAP007620-RA	TSS4293	2L:48344978-48353742	3261	-	Res	Sus	OK	0.878859	0.443862	1.31386	3.06715	1.97456	4.15974	1.24988	-4.0992	4.14587e-05	0.000568806	yes
TCONS_00009943	TCONS_00009943	j	XLOC_003087	AGAP007623	AGAP007623-RA	TSS4297	2L:48356751-48380715	6903	-	Res	Sus	OK	0.961081	0.573218	1.34894	4.13841	2.80802	5.4688	1.46001	-5.65939	1.51909e-08	5.69956e-07	yes
TCONS_00009945	TCONS_00009945	j	XLOC_003087	AGAP007623	AGAP007623-RA	TSS4296	2L:48356751-48380715	8678	-	Res	Sus	OK	0.457399	0.246679	0.668119	2.20332	1.47446	2.93218	1.57216	-5.54402	2.95604e-08	1.01501e-06	yes
TCONS_00009961	TCONS_00009961	j	XLOC_003116	AGAP007683	AGAP007683-RA	TSS4341	2L:49005691-49009044	2779	-	Res	Sus	OK	0.167404	0	0.3574	0.88323	0.428456	1.338	1.66317	-2.669	0.00760765	0.0357936	yes
TCONS_00009968	TCONS_00009968	j	XLOC_003123	AGAP007699	AGAP007699-RA	TSS4357	2L:49132061-49135070	1548	-	Res	Sus	OK	0.741967	0.241838	1.2421	3.65045	2.21402	5.08689	1.5933	-4.08273	4.45098e-05	0.000605584	yes
TCONS_00009971	TCONS_00009971	j	XLOC_003129	AGAP007708	AGAP007708-RA	TSS4369	2L:49150989-49177744	1687	-	Res	Sus	OK	6.68698	4.26199	9.11197	0.470954	0.0769697	0.864938	-2.65316	5.8197	5.89546e-09	2.4402e-07	yes
TCONS_00009972	TCONS_00009972	j	XLOC_003129	AGAP007709	AGAP007709-RA	TSS4370	2L:49150989-49177744	2102	-	Res	Sus	OK	2.02328	1.11078	2.93578	6.63053	4.35525	8.90581	1.18697	-4.18902	2.80165e-05	0.000406368	yes
TCONS_00009975	TCONS_00009975	j	XLOC_003132	AGAP007715	AGAP007715-RA	TSS4378	2L:49200862-49210724	3240	-	Res	Sus	OK	0	0	0	1.73692	1.0218	2.45205	1.79769e+308	1.79769e+308	5.93811e-07	1.42628e-05	yes
TCONS_00009976	TCONS_00009976	j	XLOC_003133	AGAP007717	AGAP007717-RA	TSS4384	2L:49211357-49234978	2027	-	Res	Sus	OK	0.655707	0.21156	1.09985	6.88762	4.52803	9.24721	2.35177	-6.19651	5.77299e-10	3.14083e-08	yes
TCONS_00009977	TCONS_00009977	j	XLOC_003133	AGAP007717	AGAP007717-RA	TSS4385	2L:49211357-49234978	1949	-	Res	Sus	OK	0	0	0	0.811519	0.327718	1.29532	1.79769e+308	1.79769e+308	0.00039716	0.00370563	yes
TCONS_00009985	TCONS_00009985	j	XLOC_003137	AGAP007723	AGAP007723-RA	TSS4397	2L:49279880-49308222	4974	-	Res	Sus	OK	2.98756	1.95197	4.02315	0.99439	0.57558	1.4132	-1.10008	4.0335	5.49522e-05	0.000724211	yes
TCONS_00011123	TCONS_00011123	j	XLOC_005993	AGAP001109	AGAP001109-RA	TSS4420	2R:268950-287320	3767	-	Res	Sus	OK	0.802012	0.409357	1.19467	1.95688	1.21742	2.69634	0.891983	-2.88456	0.00391963	0.0224023	yes
TCONS_00011124	TCONS_00011124	j	XLOC_005993	AGAP001109	AGAP001109-RA	TSS4420	2R:268950-287320	3279	-	Res	Sus	OK	0.962351	0.496648	1.42805	0	0	0	-1.79769e+308	-1.79769e+308	1.79111e-05	0.000276518	yes
TCONS_00011133	TCONS_00011133	j	XLOC_005995	AGAP001111	AGAP001111-RB	TSS4429	2R:295917-326033	2939	-	Res	Sus	OK	2.24439	1.33353	3.15524	0	0	0	-1.79769e+308	-1.79769e+308	4.15163e-07	1.04199e-05	yes
TCONS_00011152	TCONS_00011152	j	XLOC_006004	AGAP001132	AGAP001132-RA	TSS4447	2R:552698-555099	2271	-	Res	Sus	OK	2.44696	1.41641	3.47752	0.0837918	0	0.209837	-3.37427	4.32013	1.55934e-05	0.000245112	yes
TCONS_00011155	TCONS_00011155	j	XLOC_006006	AGAP001136	AGAP001136-RA	TSS4449	2R:565689-567393	1208	-	Res	Sus	OK	1.55753	0.656781	2.45828	0.216803	0	0.50345	-1.97187	2.73282	0.00627948	0.0313073	yes
TCONS_00011160	TCONS_00011160	j	XLOC_006009	AGAP001141	AGAP001141-RB	TSS4452	2R:580473-590558	5028	-	Res	Sus	OK	6.31758	4.28051	8.35465	2.84227	1.87012	3.81442	-0.798733	3.39843	0.000677745	0.00567441	yes
TCONS_00011187	TCONS_00011187	j	XLOC_006030	AGAP001187	AGAP001187-RA	TSS4475	2R:997047-1169455	6659	-	Res	Sus	OK	0.664095	0.358867	0.969323	0	0	0	-1.79769e+308	-1.79769e+308	6.76155e-06	0.00012025	yes
TCONS_00011189	TCONS_00011189	j	XLOC_006030	AGAP001187	AGAP001187-RA	TSS4476	2R:997047-1169455	6149	-	Res	Sus	OK	0.185159	0.0438334	0.326484	0	0	0	-1.79769e+308	-1.79769e+308	0.00439237	0.0243259	yes
TCONS_00011218	TCONS_00011218	j	XLOC_006047	PGRPLB	AGAP001212-RA	TSS4498	2R:1585409-1595399	1802	-	Res	Sus	OK	10.7836	7.18091	14.3862	3.50624	2.13117	4.88132	-1.12348	4.36142	1.2922e-05	0.000208925	yes
TCONS_00011222	TCONS_00011222	j	XLOC_006048	AGAP001213	AGAP001213-RA	TSS4501	2R:1596324-1604335	3156	-	Res	Sus	OK	6.40455	4.32091	8.48818	1.93391	1.2114	2.65642	-1.19747	4.83432	1.33599e-06	2.92111e-05	yes
TCONS_00011238	TCONS_00011238	j	XLOC_006056	AGAP001227	AGAP001227-RA	TSS4507	2R:1648879-1652983	3536	-	Res	Sus	OK	1.04691	0.552711	1.54111	0.21564	0.0341478	0.397132	-1.57999	3.27463	0.00105801	0.00816273	yes
TCONS_00011240	TCONS_00011240	j	XLOC_006057	AGAP001229	AGAP001229-RA	TSS4509	2R:1653330-1658336	1139	-	Res	Sus	OK	4.07099	2.209	5.93298	0.510605	0	1.02958	-2.07604	3.72528	0.000195096	0.00206383	yes
TCONS_00011245	TCONS_00011245	j	XLOC_006061	AGAP001234	AGAP001234-RA	TSS4513	2R:1750052-1757210	5886	-	Res	Sus	OK	0.623286	0.329427	0.917145	0.04183	0	0.0997736	-2.70139	3.69231	0.000222224	0.00230115	yes
TCONS_00011253	TCONS_00011253	j	XLOC_006063	AGAP001238	AGAP001238-RA	TSS4518	2R:1779495-1815345	5054	-	Res	Sus	OK	1.57336	0.961118	2.1856	0.175887	0.0371664	0.314608	-2.19113	4.98287	6.2648e-07	1.49741e-05	yes
TCONS_00011262	TCONS_00011262	j	XLOC_006069	AGAP001582	AGAP001582-RA	TSS4528	2R:1982565-1991252	2211	-	Res	Sus	OK	0.858086	0.346511	1.36966	0	0	0	-1.79769e+308	-1.79769e+308	0.000397276	0.00370592	yes
TCONS_00011279	TCONS_00011279	j	XLOC_006077	AGAP001264	AGAP001264-RA	TSS4542	2R:2095709-2098720	1838	-	Res	Sus	OK	2.339	1.31296	3.36504	0.924601	0.40185	1.44735	-0.928117	2.59395	0.00948791	0.0417716	yes
TCONS_00011287	TCONS_00011287	j	XLOC_006080	AGAP001271	AGAP001271-RB	TSS4547	2R:2147662-2175747	7626	-	Res	Sus	OK	0.790997	0.469823	1.11217	0.0604403	0	0.122795	-2.57164	4.639	3.50099e-06	6.81103e-05	yes
TCONS_00011297	TCONS_00011297	j	XLOC_006086	AGAP001281	AGAP001281-RA	TSS4555	2R:2208299-2279771	4552	-	Res	Sus	OK	5.17941	3.4601	6.89872	1.44837	0.867607	2.02913	-1.27425	4.89578	9.79162e-07	2.22241e-05	yes
TCONS_00011299	TCONS_00011299	j	XLOC_006086	AGAP001281	AGAP001281-RA	TSS4557	2R:2208299-2279771	2110	-	Res	Sus	OK	5.43993	3.48389	7.39598	0.567582	0.181271	0.953892	-2.26014	5.87226	4.29897e-09	1.84697e-07	yes
TCONS_00011302	TCONS_00011302	j	XLOC_006086	AGAP001281	AGAP001281-RA	TSS4558	2R:2208299-2279771	2392	-	Res	Sus	OK	10.2682	6.85878	13.6777	2.88191	1.718	4.04582	-1.2706	4.86041	1.17143e-06	2.59603e-05	yes
TCONS_00011303	TCONS_00011303	j	XLOC_006086	AGAP001281	AGAP001281-RA	TSS4559	2R:2208299-2279771	870	-	Res	Sus	OK	17.2587	11.0938	23.4236	3.84647	1.92358	5.76936	-1.50116	4.88646	1.02663e-06	2.31822e-05	yes
TCONS_00011316	TCONS_00011316	j	XLOC_006093	AGAP001298	AGAP001298-RA	TSS4569	2R:2648187-2656509	4873	-	Res	Sus	OK	0.640814	0.322053	0.959576	1.76004	1.10341	2.41667	1.01035	-3.24981	0.00115483	0.00875507	yes
TCONS_00011321	TCONS_00011321	j	XLOC_006095	AGAP001303	AGAP001303-RA	TSS4572	2R:2712097-2724093	1696	-	Res	Sus	OK	0.470204	0.0556621	0.884747	3.88134	2.33923	5.42345	2.11077	-4.36554	1.26807e-05	0.000205702	yes
TCONS_00011323	TCONS_00011323	j	XLOC_006095	AGAP001303	AGAP001303-RA	TSS4573	2R:2712097-2724093	1584	-	Res	Sus	OK	8.20978	5.30931	11.1102	2.44831	1.32914	3.56748	-1.20993	4.18854	2.80757e-05	0.000407094	yes
TCONS_00011330	TCONS_00011330	j	XLOC_006098	AGAP001313	AGAP001313-RA	TSS4580	2R:2842294-2869516	1821	-	Res	Sus	OK	10.4244	6.93681	13.912	0	0	0	-1.79769e+308	-1.79769e+308	1.12948e-09	5.75473e-08	yes
TCONS_00011333	TCONS_00011333	j	XLOC_006100	AGAP001320	AGAP001320-RA	TSS4582	2R:2986976-2991811	4437	-	Res	Sus	OK	1.31718	0.779834	1.85452	3.18541	2.10631	4.26452	0.883089	-3.33072	0.000866212	0.00694781	yes
TCONS_00011345	TCONS_00011345	j	XLOC_006106	AGAP001330	AGAP001330-RA	TSS4591	2R:3053978-3195439	5523	-	Res	Sus	OK	1.74635	1.09068	2.40201	0	0	0	-1.79769e+308	-1.79769e+308	4.99413e-08	1.60376e-06	yes
TCONS_00011350	TCONS_00011350	j	XLOC_006110	AGAP001337	AGAP001337-RA	TSS4598	2R:3308652-3322618	3457	-	Res	Sus	OK	3.77845	2.44944	5.10747	0.62835	0.291914	0.964787	-1.79397	5.6007	2.13493e-08	7.65228e-07	yes
TCONS_00011361	TCONS_00011361	j	XLOC_006116	ACES_ANOGA	AGAP001356-RA	TSS4605	2R:3438277-3501128	10356	-	Res	Sus	OK	6.37325	4.39371	8.35279	2.21253	1.49194	2.93311	-1.05797	4.70161	2.58114e-06	5.2314e-05	yes
TCONS_00011385	TCONS_00011385	j	XLOC_006127	AGAP001370	AGAP001370-RB	TSS4623	2R:3839546-3879913	2864	-	Res	Sus	OK	1.35362	0.744433	1.96282	0.315875	0.0866455	0.545105	-1.45519	3.40827	0.000653759	0.00550598	yes
TCONS_00011420	TCONS_00011420	j	XLOC_006151	AGAP001419	AGAP001419-RB	TSS4647	2R:4657342-4738948	2228	-	Res	Sus	OK	3.99498	2.53617	5.45379	1.43021	0.785443	2.07498	-1.02722	3.54117	0.000398351	0.00371281	yes
TCONS_00011423	TCONS_00011423	j	XLOC_006151	AGAP001419	AGAP001419-RB	TSS4651	2R:4657342-4738948	2268	-	Res	Sus	OK	6.12892	4.01626	8.24159	3.18745	1.98442	4.39049	-0.653797	2.55814	0.0105232	0.0449527	yes
TCONS_00011429	TCONS_00011429	j	XLOC_006156	AGAP001429	AGAP001429-RA	TSS4656	2R:4787206-4797676	2113	-	Res	Sus	OK	0.362527	0.0677042	0.65735	0	0	0	-1.79769e+308	-1.79769e+308	0.00696066	0.0336539	yes
TCONS_00011457	TCONS_00011457	j	XLOC_006171	AGAP001452	AGAP001452-RA	TSS4677	2R:5252530-5263027	4919	-	Res	Sus	OK	1.97253	1.26224	2.68282	4.00511	2.70017	5.31005	0.708254	-2.91693	0.00353493	0.0207963	yes
TCONS_00011465	TCONS_00011465	j	XLOC_006175	AGAP001460	AGAP001460-RA	TSS4681	2R:5286076-5294117	2886	-	Res	Sus	OK	1.11316	0.547887	1.67844	0.230646	0.0112494	0.450043	-1.57408	2.91958	0.00350498	0.0206696	yes
TCONS_00011470	TCONS_00011470	j	XLOC_006177	AGAP001469	AGAP001469-RA	TSS4684	2R:5340535-5352097	3156	-	Res	Sus	OK	2.52421	1.58186	3.46656	1.05183	0.580796	1.52287	-0.875394	3.00293	0.0026739	0.0168399	yes
TCONS_00011472	TCONS_00011472	j	XLOC_006177	AGAP001469	AGAP001469-RA	TSS4684	2R:5340535-5352097	4695	-	Res	Sus	OK	3.40492	2.2545	4.55535	0.82214	0.465219	1.17906	-1.42107	5.16641	2.38637e-07	6.35448e-06	yes
TCONS_00011480	TCONS_00011480	j	XLOC_006179	MSN	AGAP001474-RA	TSS4690	2R:5371415-5372853	935	-	Res	Sus	OK	16.834	11.0198	22.6481	2.92345	1.46375	4.38314	-1.75064	5.76702	8.06834e-09	3.23342e-07	yes
TCONS_00011487	TCONS_00011487	j	XLOC_006182	AGAP001480	AGAP001480-RC	TSS4696	2R:5397412-5407119	1972	-	Res	Sus	OK	6.91908	4.5575	9.28065	1.33368	0.701554	1.9658	-1.64634	5.63745	1.72584e-08	6.35106e-07	yes
TCONS_00011489	TCONS_00011489	j	XLOC_006182	AGAP001480	AGAP001480-RA	TSS4696	2R:5397412-5407119	5234	-	Res	Sus	OK	6.26674	4.2558	8.27767	3.24662	2.16415	4.3291	-0.657641	2.84232	0.00447861	0.0246981	yes
TCONS_00011493	TCONS_00011493	j	XLOC_006182	AGAP001480	AGAP001480-RA	TSS4700	2R:5397412-5407119	2629	-	Res	Sus	OK	4.55996	2.93092	6.189	0.242072	0.0203502	0.463793	-2.93584	5.97238	2.3382e-09	1.08484e-07	yes
TCONS_00011500	TCONS_00011500	j	XLOC_006186	AGAP001486	AGAP001486-RA	TSS4707	2R:5437130-5462040	3139	-	Res	Sus	OK	1.43529	0.7894	2.08118	0.525698	0.213573	0.837823	-1.00439	2.69636	0.00701021	0.0338527	yes
TCONS_00011509	TCONS_00011509	j	XLOC_006191	GPRMTN	AGAP001499-RB	TSS4715	2R:5673832-5688605	1906	-	Res	Sus	OK	7.62652	4.95923	10.2938	1.92323	1.03029	2.81617	-1.37762	4.74	2.13718e-06	4.41888e-05	yes
TCONS_00011512	TCONS_00011512	j	XLOC_006191	GPRMTN	AGAP001499-RB	TSS4716	2R:5673832-5688605	1568	-	Res	Sus	OK	1.2052	0.491121	1.91927	0	0	0	-1.79769e+308	-1.79769e+308	0.000368345	0.00348765	yes
TCONS_00011520	TCONS_00011520	j	XLOC_006194	AGAP001504	AGAP001504-RA	TSS4720	2R:5695055-5698055	825	-	Res	Sus	OK	5.07139	2.74222	7.40055	0.749863	0.0305568	1.46917	-1.91148	3.59459	0.000324898	0.00314719	yes
TCONS_00011531	TCONS_00011531	j	XLOC_006198	AGAP001520	AGAP001520-RB	TSS4728	2R:5789029-5812776	2722	-	Res	Sus	OK	5.13741	3.3992	6.87561	9.85426	6.71694	12.9916	0.651355	-2.80405	0.00504656	0.0269575	yes
TCONS_00011545	TCONS_00011545	j	XLOC_006207	AGAP001535	AGAP001535-RA	TSS4736	2R:5939939-5957773	13460	-	Res	Sus	OK	1.6211	1.0854	2.1568	0.888007	0.579659	1.19636	-0.601881	2.51126	0.01203	0.0489939	yes
TCONS_00011554	TCONS_00011554	j	XLOC_006212	AGAP001549	AGAP001549-RA	TSS4743	2R:6099402-6102779	3069	-	Res	Sus	OK	4.26498	2.78902	5.74093	0.244502	0.0503674	0.438636	-2.85897	6.60165	4.06613e-11	2.8523e-09	yes
TCONS_00011556	TCONS_00011556	j	XLOC_006213	AGAP001550	AGAP001550-RA	TSS4744	2R:6104278-6108570	2223	-	Res	Sus	OK	4.65483	2.89065	6.41901	0.617501	0.190526	1.04448	-2.01998	5.12351	2.99903e-07	7.79765e-06	yes
TCONS_00011558	TCONS_00011558	j	XLOC_006213	AGAP001550	AGAP001550-RA	TSS4745	2R:6104278-6108570	1408	-	Res	Sus	OK	1.1392	0.379718	1.89869	0	0	0	-1.79769e+308	-1.79769e+308	0.00135018	0.00993564	yes
TCONS_00011596	TCONS_00011596	j	XLOC_006229	AGAP001577	AGAP001577-RA	TSS4769	2R:6368110-6434789	5112	-	Res	Sus	OK	3.14249	2.06414	4.22084	6.07535	4.12853	8.02217	0.659225	-2.80815	0.00498265	0.0267067	yes
TCONS_00011599	TCONS_00011599	j	XLOC_006230	AGAP001581	AGAP001581-RA	TSS4772	2R:6437235-6458933	2067	-	Res	Sus	OK	5.50167	3.52888	7.47445	2.57687	1.51321	3.64054	-0.758474	2.77437	0.0055309	0.0286365	yes
TCONS_00011600	TCONS_00011600	j	XLOC_006230	AGAP001581	AGAP001581-RA	TSS4773	2R:6437235-6458933	2617	-	Res	Sus	OK	1.47184	0.788762	2.15491	0.310627	0.0597332	0.561521	-1.55567	3.34001	0.000837768	0.00676764	yes
TCONS_00011624	TCONS_00011624	j	XLOC_006240	AGAP001604	AGAP001604-RA	TSS4788	2R:6647516-6679508	5977	-	Res	Sus	OK	0.771662	0.427601	1.11572	0.0956364	0.00164581	0.189627	-2.08799	3.86951	0.000109053	0.00126959	yes
TCONS_00011650	TCONS_00011650	j	XLOC_006255	AGAP001643	AGAP001643-RA	TSS4804	2R:7256644-7265879	5358	-	Res	Sus	OK	2.68006	1.75205	3.60808	1.10806	0.6645	1.55162	-0.88323	3.33744	0.000845538	0.00681543	yes
TCONS_00011651	TCONS_00011651	j	XLOC_006255	AGAP001643	AGAP001643-RA	TSS4804	2R:7256644-7265879	5200	-	Res	Sus	OK	0.219818	0.0609471	0.37869	2.19266	1.42015	2.96516	2.30007	-5.7213	1.05715e-08	4.1169e-07	yes
TCONS_00011693	TCONS_00011693	j	XLOC_006284	AGAP001690	AGAP001690-RA	TSS4835	2R:8465449-8512893	9290	-	Res	Sus	OK	0.906961	0.566053	1.24787	0.233368	0.112251	0.354485	-1.35748	4.23675	2.26777e-05	0.000338386	yes
TCONS_00011694	TCONS_00011694	j	XLOC_006284	AGAP001690	AGAP001690-RA	TSS4835	2R:8465449-8512893	10885	-	Res	Sus	OK	0.464842	0.264353	0.665332	0.0603554	0.00599698	0.114714	-2.04145	4.08867	4.33847e-05	0.000592101	yes
TCONS_00011697	TCONS_00011697	j	XLOC_006284	AGAP001690	AGAP001690-RA	TSS4839	2R:8465449-8512893	8839	-	Res	Sus	OK	0.79325	0.482581	1.10392	0.113742	0.0341744	0.19331	-1.94221	4.84513	1.26526e-06	2.78439e-05	yes
TCONS_00011698	TCONS_00011698	j	XLOC_006284	AGAP001690	AGAP001690-RA	TSS4839	2R:8465449-8512893	9021	-	Res	Sus	OK	0.204436	0.0880166	0.320855	0	0	0	-1.79769e+308	-1.79769e+308	0.000222319	0.00230159	yes
TCONS_00011700	TCONS_00011700	j	XLOC_006285	AGAP013145	AGAP013145-RB	TSS4841	2R:8514466-8672791	7887	-	Res	Sus	OK	0.758968	0.453634	1.0643	0.0525843	0	0.107725	-2.66954	4.75372	1.99708e-06	4.16433e-05	yes
TCONS_00011709	TCONS_00011709	j	XLOC_006289	AGAP001696	AGAP001696-RA	TSS4848	2R:8719344-8777381	6400	-	Res	Sus	OK	4.07923	2.74362	5.41485	1.42244	0.895304	1.94957	-1.05354	4.26098	2.03533e-05	0.000308501	yes
TCONS_00011754	TCONS_00011754	j	XLOC_006319	AGAP001747	AGAP001747-RA	TSS4889	2R:9246966-9254036	3584	-	Res	Sus	OK	17.2122	11.8444	22.58	33.0129	22.7504	43.2754	0.651278	-2.95811	0.00309527	0.0188142	yes
TCONS_00011762	TCONS_00011762	j	XLOC_006321	AGAP001751	AGAP001751-RB	TSS4895	2R:9305703-9397954	3542	-	Res	Sus	OK	3.78513	2.46351	5.10675	1.37446	0.798042	1.95088	-1.01302	3.71271	0.000205054	0.00215009	yes
TCONS_00011770	TCONS_00011770	j	XLOC_006323	AGAP001753	AGAP001753-RA	TSS4903	2R:9444298-9446234	1775	-	Res	Sus	OK	2.83067	1.58614	4.07521	0.145474	0	0.348249	-2.96827	4.06172	4.87123e-05	0.000654088	yes
TCONS_00011772	TCONS_00011772	j	XLOC_006324	AGAP001754	AGAP001754-RA	TSS4905	2R:9446576-9460299	8936	-	Res	Sus	OK	0.514993	0.290802	0.739185	0.0619455	0.00274917	0.121142	-2.1179	4.03369	5.49079e-05	0.000724275	yes
TCONS_00011774	TCONS_00011774	j	XLOC_006325	AGAP001759	AGAP001759-RA	TSS4907	2R:9479329-9485151	2564	-	Res	Sus	OK	21.1457	14.5158	27.7757	11.9106	8.08535	15.7359	-0.574008	2.55777	0.0105345	0.0449789	yes
TCONS_00011776	TCONS_00011776	j	XLOC_006326	AGAP001762	AGAP001762-RA	TSS4908	2R:9486756-9493959	4360	-	Res	Sus	OK	2.37299	1.50038	3.2456	0.525965	0.25021	0.801721	-1.50667	4.70549	2.53254e-06	5.14471e-05	yes
TCONS_00011798	TCONS_00011798	j	XLOC_006336	AGAP001780	AGAP001780-RA	TSS4925	2R:10214261-10232015	12955	-	Res	Sus	OK	7.30775	5.04184	9.57365	3.26045	2.23433	4.28657	-0.807069	3.65353	0.000258658	0.00260982	yes
TCONS_00011799	TCONS_00011799	j	XLOC_006336	AGAP001780	AGAP001780-RA	TSS4925	2R:10214261-10232015	12910	-	Res	Sus	OK	2.13526	1.44154	2.82897	0.588024	0.364722	0.811326	-1.28957	5.16076	2.45951e-07	6.52955e-06	yes
TCONS_00011808	TCONS_00011808	j	XLOC_006339	AGAP001786	AGAP001786-RA	TSS4933	2R:10351380-10460681	12042	-	Res	Sus	OK	1.18138	0.773738	1.58901	0	0	0	-1.79769e+308	-1.79769e+308	3.3917e-09	1.50253e-07	yes
TCONS_00011809	TCONS_00011809	j	XLOC_006339	AGAP001786	AGAP001786-RA	TSS4935	2R:10351380-10460681	8775	-	Res	Sus	OK	0.678632	0.404917	0.952347	0.255897	0.126455	0.385339	-0.975304	3.01507	0.00256923	0.0163723	yes
TCONS_00011813	TCONS_00011813	j	XLOC_006343	AGAP001791	AGAP001791-RA	TSS4942	2R:10498414-10597905	3964	-	Res	Sus	OK	0	0	0	0.729524	0.374563	1.08449	1.79769e+308	1.79769e+308	1.9745e-05	0.000300727	yes
TCONS_00011828	TCONS_00011828	j	XLOC_006342	AGAP001799	AGAP001799-RA	TSS4940	2R:10498414-10597905	2551	-	Res	Sus	OK	196.641	131.63	261.651	437.6	267.857	607.342	0.799926	-3.139	0.00169527	0.011858	yes
TCONS_00011830	TCONS_00011830	j	XLOC_006342	AGAP001799	AGAP001799-RA	TSS4941	2R:10498414-10597905	1629	-	Res	Sus	OK	127.698	87.4556	167.94	304.678	200.861	408.495	0.869588	-3.74717	0.000178843	0.00192324	yes
TCONS_00011842	TCONS_00011842	j	XLOC_006355	AGAP001814	AGAP001814-RA	TSS4960	2R:10859311-10866073	1784	-	Res	Sus	OK	1.08475	0.429173	1.74033	0	0	0	-1.79769e+308	-1.79769e+308	0.00046766	0.00421716	yes
TCONS_00011871	TCONS_00011871	j	XLOC_006380	AGAP001867	AGAP001867-RA	TSS4974	2R:11691757-11701405	6678	-	Res	Sus	OK	19.319	13.3351	25.3029	8.53409	5.87564	11.1925	-0.81702	3.71971	0.00019945	0.00210384	yes
TCONS_00011897	TCONS_00011897	j	XLOC_006397	AGAP001905	AGAP001905-RB	TSS4993	2R:11978381-11989558	4032	-	Res	Sus	OK	4.19395	2.75881	5.62908	1.67269	1.01517	2.33021	-0.919211	3.52749	0.000419512	0.00387241	yes
TCONS_00011907	TCONS_00011907	j	XLOC_006402	AGAP001913	AGAP001913-RA	TSS5000	2R:12016313-12023879	2764	-	Res	Sus	OK	1.59408	0.880082	2.30808	0.195309	0.00190372	0.388713	-2.09947	3.86344	0.000111799	0.00129405	yes
TCONS_00011912	TCONS_00011912	j	XLOC_006405	AGAP001916	AGAP001916-RA	TSS5005	2R:12036602-12090928	4718	-	Res	Sus	OK	1.56535	0.962576	2.16812	0.44537	0.212699	0.678041	-1.25696	3.87351	0.00010728	0.00125292	yes
TCONS_00011921	TCONS_00011921	j	XLOC_006412	AGAP001925	AGAP001925-RA	TSS5011	2R:12299383-12333450	2890	-	Res	Sus	OK	0.976594	0.467723	1.48547	0	0	0	-1.79769e+308	-1.79769e+308	6.1951e-05	0.000796928	yes
TCONS_00011934	TCONS_00011934	j	XLOC_006418	AGAP001935	AGAP001935-RB	TSS5019	2R:12534895-12624315	7374	-	Res	Sus	OK	0.927324	0.550987	1.30366	2.2249	1.47028	2.97953	0.875166	-3.30937	0.000935054	0.00739115	yes
TCONS_00011940	TCONS_00011940	j	XLOC_006421	AGAP013214	AGAP013214-RA	TSS5025	2R:12674485-12680907	2824	-	Res	Sus	OK	2.46713	1.47638	3.45788	5.56214	3.67872	7.44556	0.812926	-3.09517	0.001967	0.0133215	yes
TCONS_00011941	TCONS_00011941	j	XLOC_006421	AGAP013214	AGAP013214-RA	TSS5025	2R:12674485-12680907	2816	-	Res	Sus	OK	0.979174	0.473526	1.48482	4.97085	3.26296	6.67873	1.62464	-5.23859	1.61807e-07	4.5503e-06	yes
TCONS_00011970	TCONS_00011970	j	XLOC_006435	AGAP001971	AGAP001971-RA	TSS5043	2R:12994458-12999282	1130	-	Res	Sus	OK	31.2025	21.2663	41.1387	4.53064	2.6978	6.36349	-1.92963	7.49603	6.57252e-14	7.79568e-12	yes
TCONS_00011974	TCONS_00011974	j	XLOC_006438	AGAP001976	AGAP001976-RA	TSS5046	2R:13018936-13020014	636	-	Res	Sus	OK	2.89132	1.3152	4.46745	0.444119	0	0.975785	-1.87338	2.84838	0.0043942	0.024333	yes
TCONS_00011981	TCONS_00011981	j	XLOC_006443	AGAP001988	AGAP001988-RA	TSS5051	2R:13208875-13211226	1083	-	Res	Sus	OK	5.447	3.16988	7.72412	2.11855	0.99153	3.24557	-0.944334	2.79148	0.00524681	0.0275765	yes
TCONS_00012027	TCONS_00012027	j	XLOC_006474	AGAP002030	AGAP002030-RA	TSS5079	2R:14084494-14098004	9419	-	Res	Sus	OK	0.879345	0.548757	1.20993	0.258134	0.129393	0.386875	-1.2257	3.925	8.67288e-05	0.00104756	yes
TCONS_00012032	TCONS_00012032	j	XLOC_006476	AGAP002036	AGAP002036-RA	TSS5083	2R:14119188-14129612	8137	-	Res	Sus	OK	5.66036	3.85118	7.46955	19.7818	13.641	25.9227	1.25128	-5.61661	1.94741e-08	7.05463e-07	yes
TCONS_00012038	TCONS_00012038	j	XLOC_006479	AGAP002040	AGAP002040-RB	TSS5088	2R:14253343-14301999	3002	-	Res	Sus	OK	0.775117	0.352025	1.19821	0	0	0	-1.79769e+308	-1.79769e+308	0.000124124	0.00141407	yes
TCONS_00012064	TCONS_00012064	j	XLOC_006495	AGAP002065	AGAP002065-RA	TSS5109	2R:14723264-14725064	1410	-	Res	Sus	OK	1.23707	0.507081	1.96705	0.0773891	0	0.213286	-2.77165	2.99231	0.00276872	0.0173037	yes
TCONS_00012092	TCONS_00012092	j	XLOC_006511	AGAP002090	AGAP002090-RA	TSS5133	2R:15170001-15212129	4403	-	Res	Sus	OK	3.32096	2.15607	4.48585	1.00107	0.556286	1.44585	-1.19919	4.2368	2.26733e-05	0.000338435	yes
TCONS_00012101	TCONS_00012101	j	XLOC_006514	AGAP002100	AGAP002100-RA	TSS5139	2R:15333632-15348050	2749	-	Res	Sus	OK	2.81716	1.7135	3.92081	1.0012	0.502712	1.49969	-1.03452	3.26585	0.00109137	0.00836887	yes
TCONS_00012106	TCONS_00012106	j	XLOC_006518	AGAP002104	AGAP002104-RA	TSS5145	2R:15440432-15572504	5535	-	Res	Sus	OK	0.877714	0.498649	1.25678	0.334677	0.150234	0.519119	-0.964156	2.75407	0.005886	0.0299894	yes
TCONS_00012116	TCONS_00012116	j	XLOC_006523	AGAP002113	AGAP002113-RA	TSS5151	2R:15755286-15781688	3460	-	Res	Sus	OK	0.528274	0.215969	0.840579	0	0	0	-1.79769e+308	-1.79769e+308	0.000358404	0.00340743	yes
TCONS_00012131	TCONS_00012131	j	XLOC_006532	AGAP002135	AGAP002135-RB	TSS5164	2R:16132227-16323525	2756	-	Res	Sus	OK	6.05816	3.98654	8.12977	2.69127	1.64674	3.7358	-0.811392	3.13722	0.00170559	0.0119113	yes
TCONS_00012136	TCONS_00012136	j	XLOC_006532	AGAP002135	AGAP002135-RB	TSS5166	2R:16132227-16323525	1491	-	Res	Sus	OK	0.703281	0.130433	1.27613	0	0	0	-1.79769e+308	-1.79769e+308	0.00703674	0.0339547	yes
TCONS_00012144	TCONS_00012144	j	XLOC_006539	AGAP002149	AGAP002149-RA	TSS5173	2R:16421313-16464394	9817	-	Res	Sus	OK	7.94814	5.48617	10.4101	3.1824	2.16857	4.19622	-0.915303	4.11985	3.79116e-05	0.00052719	yes
TCONS_00012146	TCONS_00012146	j	XLOC_006539	AGAP002149	AGAP002149-RA	TSS5175	2R:16421313-16464394	7842	-	Res	Sus	OK	4.07982	2.77223	5.3874	0.491994	0.276719	0.707269	-2.11534	7.80021	6.21725e-15	8.70869e-13	yes
TCONS_00012188	TCONS_00012188	j	XLOC_006551	AGAP002175	AGAP002175-RA	TSS5201	2R:16899947-16901902	1627	-	Res	Sus	OK	7.71684	4.96222	10.4715	2.20554	1.17022	3.24087	-1.25243	4.24751	2.1616e-05	0.000324741	yes
TCONS_00012216	TCONS_00012216	j	XLOC_006567	AGAP002194	AGAP002194-RA	TSS5219	2R:17422663-17477310	3129	-	Res	Sus	OK	1.8584	1.10431	2.6125	0.0959591	0	0.214429	-2.96355	4.56084	5.09486e-06	9.40981e-05	yes
TCONS_00012224	TCONS_00012224	j	XLOC_006569	AGAP013290	AGAP013290-RB	TSS5225	2R:17496292-17515225	2458	-	Res	Sus	OK	2.45674	1.45506	3.45842	0.280966	0.0389975	0.522935	-2.16836	4.55134	5.3306e-06	9.79601e-05	yes
TCONS_00012246	TCONS_00012246	j	XLOC_006583	AGAP002224	AGAP002224-RA	TSS5242	2R:17716702-17731996	4691	-	Res	Sus	OK	2.72799	1.75214	3.70383	0.289598	0.0971294	0.482066	-2.24283	5.94315	2.796e-09	1.26014e-07	yes
TCONS_00012250	TCONS_00012250	j	XLOC_006584	AGAP002226	AGAP002226-RA	TSS5245	2R:17736571-17788652	6097	-	Res	Sus	OK	1.17013	0.708915	1.63135	0.290277	0.125839	0.454715	-1.39404	4.03998	5.34569e-05	0.000707038	yes
TCONS_00012260	TCONS_00012260	j	XLOC_006588	AGAP002233	AGAP002233-RA	TSS5250	2R:17922000-17962112	3637	-	Res	Sus	OK	1.64889	0.964163	2.33362	0.285293	0.0794714	0.491114	-1.75434	4.21505	2.49721e-05	0.000367404	yes
TCONS_00012261	TCONS_00012261	j	XLOC_006588	AGAP002233	AGAP002233-RA	TSS5251	2R:17922000-17962112	5736	-	Res	Sus	OK	0.147844	0.019559	0.27613	0.639524	0.344663	0.934384	1.46456	-2.98101	0.00287296	0.0178164	yes
TCONS_00012276	TCONS_00012276	j	XLOC_006595	AGAP002252	AGAP002252-RA	TSS5263	2R:18200542-18208745	3714	-	Res	Sus	OK	0.534708	0.227611	0.841806	0.0481226	0	0.122661	-2.40797	2.91527	0.00355379	0.0208683	yes
TCONS_00012295	TCONS_00012295	j	XLOC_006602	AGAP002274	AGAP002274-RA	TSS5279	2R:18416585-18507996	10827	-	Res	Sus	OK	2.74296	1.85948	3.62644	0.271716	0.144027	0.399405	-2.31204	8.1164	4.44089e-16	8.03055e-14	yes
TCONS_00012301	TCONS_00012301	j	XLOC_006602	AGAP002274	AGAP002274-RA	TSS5282	2R:18416585-18507996	7540	-	Res	Sus	OK	8.80378	6.07286	11.5347	0.728917	0.439739	1.01809	-2.49138	9.89429	0	0	yes
TCONS_00012302	TCONS_00012302	j	XLOC_006602	AGAP002274	AGAP002274-RA	TSS5282	2R:18416585-18507996	2701	-	Res	Sus	OK	23.5949	16.2695	30.9203	13.1659	9.05215	17.2797	-0.583399	2.64896	0.00807401	0.0373506	yes
TCONS_00012309	TCONS_00012309	j	XLOC_006607	AGAP002281	AGAP002281-RA	TSS5291	2R:18539508-18547211	2385	-	Res	Sus	OK	0.967086	0.428494	1.50568	0.0702075	0	0.184686	-2.62283	3.04439	0.00233155	0.0151823	yes
TCONS_00012323	TCONS_00012323	j	XLOC_006618	AGAP002304	AGAP002304-RA	TSS5302	2R:19042365-19052486	5385	-	Res	Sus	OK	1.06401	0.624479	1.50354	0.127247	0.0177793	0.236715	-2.12367	4.45066	8.56072e-06	0.000147146	yes
TCONS_00012329	TCONS_00012329	j	XLOC_006621	WDY_ANOGA	AGAP002309-RA	TSS5307	2R:19060526-19153812	2877	-	Res	Sus	OK	1.0562	0.525624	1.58678	0	0	0	-1.79769e+308	-1.79769e+308	3.42666e-05	0.000483822	yes
TCONS_00012340	TCONS_00012340	j	XLOC_006626	AGAP002321	AGAP002321-RA	TSS5313	2R:19489178-19536141	16121	-	Res	Sus	OK	1.43502	0.960913	1.90913	0.609776	0.388938	0.830614	-0.855845	3.49167	0.000480006	0.00430299	yes
TCONS_00012356	TCONS_00012356	j	XLOC_006634	SPAST_ANOGA	AGAP002334-RA	TSS5323	2R:19976918-19996749	1794	-	Res	Sus	OK	3.65054	2.14889	5.15218	1.22773	0.55848	1.89698	-1.08971	3.19141	0.0014158	0.0103102	yes
TCONS_00012359	TCONS_00012359	j	XLOC_006634	SPAST_ANOGA	AGAP002334-RA	TSS5324	2R:19976918-19996749	4038	-	Res	Sus	OK	2.08169	1.27773	2.88565	0.554029	0.259466	0.848593	-1.32372	4.02871	5.6083e-05	0.000734942	yes
TCONS_00012360	TCONS_00012360	j	XLOC_006634	SPAST_ANOGA	AGAP002334-RA	TSS5324	2R:19976918-19996749	4050	-	Res	Sus	OK	2.55012	1.60795	3.49229	0.510441	0.231796	0.789086	-1.60862	4.88078	1.05669e-06	2.37152e-05	yes
TCONS_00012393	TCONS_00012393	j	XLOC_006651	AGAP002366	AGAP002366-RA	TSS5345	2R:20665213-20681870	7617	-	Res	Sus	OK	3.4866	2.35199	4.62122	0.610696	0.352014	0.869377	-1.74208	6.52275	6.90319e-11	4.59411e-09	yes
TCONS_00012408	TCONS_00012408	j	XLOC_006659	AGAP002381	AGAP002381-RA	TSS5353	2R:20866389-20871377	2716	-	Res	Sus	OK	0.765196	0.351136	1.17926	0.0702093	0	0.171788	-2.38865	3.09274	0.00198319	0.0134004	yes
TCONS_00012440	TCONS_00012440	j	XLOC_006677	AGAP002411	AGAP002411-RA	TSS5376	2R:20980895-21020204	6548	-	Res	Sus	OK	0.345639	0.156706	0.534572	0	0	0	-1.79769e+308	-1.79769e+308	0.000126671	0.00143753	yes
TCONS_00012443	TCONS_00012443	j	XLOC_006677	AGAP002411	AGAP002411-RA	TSS5377	2R:20980895-21020204	3078	-	Res	Sus	OK	3.50763	2.25141	4.76385	0.31779	0.0924513	0.543129	-2.4013	6.04564	1.4882e-09	7.2879e-08	yes
TCONS_00012453	TCONS_00012453	j	XLOC_006679	AGAP002415	AGAP002415-RA	TSS5383	2R:21045563-21047271	1205	-	Res	Sus	OK	3.70013	2.09471	5.30554	0.112478	0	0.295658	-3.49336	4.14547	3.39123e-05	0.000479588	yes
TCONS_00012466	TCONS_00012466	j	XLOC_006686	AGAP002424	AGAP002424-RA	TSS5395	2R:21124462-21204021	4293	-	Res	Sus	OK	2.16443	1.36086	2.968	0.684262	0.357813	1.01071	-1.15157	3.80988	0.000139037	0.00155783	yes
TCONS_00012474	TCONS_00012474	j	XLOC_006690	AGAP002434	AGAP002434-RA	TSS5402	2R:21353079-21376212	5091	-	Res	Sus	OK	2.13947	1.38611	2.89283	0.915243	0.543805	1.28668	-0.849124	3.1607	0.00157392	0.0112245	yes
TCONS_00012475	TCONS_00012475	j	XLOC_006690	AGAP002434	AGAP002434-RA	TSS5403	2R:21353079-21376212	4470	-	Res	Sus	OK	3.38106	2.24109	4.52103	1.1087	0.665337	1.55205	-1.115	4.26338	2.01357e-05	0.000305939	yes
TCONS_00012478	TCONS_00012478	j	XLOC_006691	AGAP002439	AGAP002439-RB	TSS5405	2R:21421575-21429777	3615	-	Res	Sus	OK	10.8336	7.37139	14.2959	2.81448	1.7922	3.83677	-1.34788	5.57203	2.51789e-08	8.79626e-07	yes
TCONS_00012518	TCONS_00012518	j	XLOC_006717	AGAP002490	AGAP002490-RA	TSS5440	2R:21966977-21974640	5517	-	Res	Sus	OK	0.806274	0.456254	1.15629	0.159111	0.0416253	0.276597	-1.62282	3.7892	0.000151131	0.00167126	yes
TCONS_00012520	TCONS_00012520	j	XLOC_006718	AGAP002493	AGAP002493-RA	TSS5442	2R:21991035-22002468	2635	-	Res	Sus	OK	0.793312	0.347791	1.23883	0	0	0	-1.79769e+308	-1.79769e+308	0.000184525	0.00197185	yes
TCONS_00012522	TCONS_00012522	j	XLOC_006718	AGAP002493	AGAP002493-RA	TSS5442	2R:21991035-22002468	7369	-	Res	Sus	OK	0.993714	0.599261	1.38817	0.254801	0.111444	0.398157	-1.36097	3.9531	7.71467e-05	0.000956701	yes
TCONS_00012523	TCONS_00012523	j	XLOC_006718	AGAP002493	AGAP002493-RA	TSS5443	2R:21991035-22002468	6300	-	Res	Sus	OK	3.01084	1.99899	4.02269	0.525608	0.279022	0.772194	-1.74542	6.04898	1.45765e-09	7.15414e-08	yes
TCONS_00012524	TCONS_00012524	j	XLOC_006718	AGAP002493	AGAP002493-RA	TSS5445	2R:21991035-22002468	4712	-	Res	Sus	OK	2.09825	1.32303	2.87347	4.66946	3.14062	6.1983	0.79994	-3.24086	0.00119169	0.00896061	yes
TCONS_00012544	TCONS_00012544	j	XLOC_006733	AGAP002527	AGAP002527-RA	TSS5460	2R:22364153-22371320	4681	-	Res	Sus	OK	0.331596	0.13109	0.532102	0.0359587	0	0.0904652	-2.22155	2.72255	0.00647811	0.0320477	yes
TCONS_00012548	TCONS_00012548	j	XLOC_006736	AGAP002529	AGAP002529-RA	TSS5464	2R:22417883-22443284	3586	-	Res	Sus	OK	1.9565	1.18294	2.73005	0	0	0	-1.79769e+308	-1.79769e+308	2.11333e-07	5.72416e-06	yes
TCONS_00012550	TCONS_00012550	j	XLOC_006736	AGAP002529	AGAP002529-RA	TSS5466	2R:22417883-22443284	10240	-	Res	Sus	OK	0.275028	0.138895	0.41116	0.0352566	0	0.0749685	-2.05422	3.3393	0.000839893	0.00678108	yes
TCONS_00012592	TCONS_00012592	j	XLOC_006757	AGAP002569	AGAP002569-RA	TSS5495	2R:23000984-23005339	1897	-	Res	Sus	OK	30.133	20.7017	39.5644	15.753	10.6609	20.8451	-0.64859	2.88298	0.00393935	0.0224801	yes
TCONS_00012596	TCONS_00012596	j	XLOC_006759	AGAP002573	AGAP002573-RA	TSS5497	2R:23016854-23093130	3838	-	Res	Sus	OK	1.42412	0.827122	2.02112	0.141408	0.00294851	0.279868	-2.30966	4.33692	1.4449e-05	0.000229411	yes
TCONS_00012597	TCONS_00012597	j	XLOC_006759	AGAP002573	AGAP002573-RA	TSS5498	2R:23016854-23093130	843	-	Res	Sus	OK	2.42718	1.10203	3.75233	0.407629	0	0.882803	-1.78413	2.77206	0.00557025	0.0288132	yes
TCONS_00012602	TCONS_00012602	j	XLOC_006761	AGAP002579	AGAP002579-RA	TSS5503	2R:23252732-23275160	2727	-	Res	Sus	OK	3.24223	2.01786	4.46659	1.11079	0.572476	1.6491	-1.07119	3.48707	0.000488338	0.00436438	yes
TCONS_00012611	TCONS_00012611	j	XLOC_006768	AGAP002591	AGAP002591-RA	TSS5510	2R:23313568-23658367	3839	-	Res	Sus	OK	1.37345	0.79991	1.947	0.461594	0.20785	0.715338	-1.0904	3.15903	0.00158297	0.0112745	yes
TCONS_00012629	TCONS_00012629	j	XLOC_006781	AGAP002603	AGAP002603-RA	TSS5522	2R:23823898-23830836	1771	-	Res	Sus	OK	3.97334	2.4034	5.54329	0.650598	0.210015	1.09118	-1.80947	4.61578	3.91623e-06	7.50634e-05	yes
TCONS_00012655	TCONS_00012655	j	XLOC_006795	AGAP002622	AGAP002622-RA	TSS5537	2R:24272224-24276543	2189	-	Res	Sus	OK	2.95026	1.73308	4.16744	0.218919	0	0.461588	-2.60094	4.39806	1.09224e-05	0.000180972	yes
TCONS_00012682	TCONS_00012682	j	XLOC_006810	AGAP002644	AGAP002644-RA	TSS5553	2R:24825282-24979792	7788	-	Res	Sus	OK	3.58387	2.42188	4.74585	0	0	0	-1.79769e+308	-1.79769e+308	3.44681e-10	1.99062e-08	yes
TCONS_00012684	TCONS_00012684	j	XLOC_006810	AGAP002644	AGAP002644-RA	TSS5554	2R:24825282-24979792	2356	-	Res	Sus	OK	5.7296	3.70941	7.7498	2.02261	1.14396	2.90127	-1.04126	3.72212	0.000197559	0.00208638	yes
TCONS_00012688	TCONS_00012688	j	XLOC_006810	AGAP002644	AGAP002644-RA	TSS5559	2R:24825282-24979792	7199	-	Res	Sus	OK	1.74671	1.13383	2.35958	0.213175	0.0884908	0.33786	-2.10337	6.16768	6.92998e-10	3.69736e-08	yes
TCONS_00012689	TCONS_00012689	j	XLOC_006810	AGAP002644	AGAP002644-RA	TSS5560	2R:24825282-24979792	5264	-	Res	Sus	OK	1.00458	0.580847	1.42831	0	0	0	-1.79769e+308	-1.79769e+308	1.06027e-06	2.37836e-05	yes
TCONS_00012730	TCONS_00012730	j	XLOC_006832	AGAP002671	AGAP002671-RA	TSS5591	2R:25280521-25288691	1521	-	Res	Sus	OK	1.30346	0.565059	2.04185	0.129692	0	0.321471	-2.30761	2.91452	0.00356234	0.0208962	yes
TCONS_00012739	TCONS_00012739	j	XLOC_006837	AGAP002682	AGAP002682-RA	TSS5598	2R:25601815-25611226	7459	-	Res	Sus	OK	4.27081	2.89652	5.64511	0.635559	0.367165	0.903954	-1.90505	7.17635	7.15872e-13	7.13012e-11	yes
TCONS_00012750	TCONS_00012750	j	XLOC_006842	AGAP002695	AGAP002695-RA	TSS5605	2R:25667466-25720908	6613	-	Res	Sus	OK	0.95808	0.571968	1.34419	2.6795	1.79118	3.56782	1.02845	-3.94161	8.09381e-05	0.000993388	yes
TCONS_00012754	TCONS_00012754	j	XLOC_006842	AGAP002695	AGAP002695-RA	TSS5610	2R:25667466-25720908	6458	-	Res	Sus	OK	2.54052	1.68017	3.40086	1.19395	0.747009	1.64089	-0.7551	2.99174	0.00277392	0.0173141	yes
TCONS_00012763	TCONS_00012763	j	XLOC_006850	AGAP002704	AGAP002704-RA	TSS5612	2R:25826280-25828161	932	-	Res	Sus	OK	6.28458	3.65906	8.9101	1.26331	0.387379	2.13924	-1.60436	3.96386	7.37473e-05	0.000921016	yes
TCONS_00012767	TCONS_00012767	j	XLOC_006852	AGAP002708	AGAP002708-RB	TSS5614	2R:25936373-25944858	893	-	Res	Sus	OK	0.843149	0.0981965	1.5881	0	0	0	-1.79769e+308	-1.79769e+308	0.0117984	0.0482734	yes
TCONS_00012768	TCONS_00012768	j	XLOC_006852	AGAP002708	AGAP002708-RB	TSS5614	2R:25936373-25944858	1358	-	Res	Sus	OK	0.175432	0	0.428835	2.07684	1.05398	3.0997	2.47135	-3.23876	0.0012005	0.00900846	yes
TCONS_00012773	TCONS_00012773	j	XLOC_006853	AGAP002711	AGAP002711-RB	TSS5619	2R:26013460-26046048	5590	-	Res	Sus	OK	3.00784	1.99951	4.01616	0.216746	0.0812672	0.352224	-2.63025	7.41668	1.20126e-13	1.36255e-11	yes
TCONS_00012777	TCONS_00012777	j	XLOC_006853	AGAP002711	AGAP002711-RB	TSS5621	2R:26013460-26046048	4356	-	Res	Sus	OK	1.82861	1.14981	2.50741	0.624872	0.333125	0.916619	-1.07377	3.60037	0.000317769	0.00309036	yes
TCONS_00012781	TCONS_00012781	j	XLOC_006856	AGAP002715	AGAP002715-RA	TSS5626	2R:26122335-26165617	10576	-	Res	Sus	OK	4.70579	3.22297	6.18861	2.51234	1.69856	3.32612	-0.627581	2.77753	0.00547731	0.0284726	yes
TCONS_00012782	TCONS_00012782	j	XLOC_006856	AGAP002715	AGAP002715-RA	TSS5627	2R:26122335-26165617	10351	-	Res	Sus	OK	1.49742	0.981376	2.01347	0.170807	0.072265	0.26935	-2.17096	6.46107	1.03968e-10	6.70671e-09	yes
TCONS_00012787	TCONS_00012787	j	XLOC_006858	AGAP002719	AGAP002719-RA	TSS5633	2R:26185493-26234417	8820	-	Res	Sus	OK	2.53665	1.6947	3.37859	0.644096	0.382285	0.905907	-1.37075	5.22413	1.74972e-07	4.87084e-06	yes
TCONS_00012805	TCONS_00012805	j	XLOC_006870	AGAP002736	AGAP002736-RB	TSS5650	2R:26356322-26362523	2534	-	Res	Sus	OK	5.76118	3.77174	7.75062	0.592069	0.234525	0.949613	-2.27527	6.54145	6.09246e-11	4.12297e-09	yes
TCONS_00012806	TCONS_00012806	j	XLOC_006870	AGAP002736	AGAP002736-RB	TSS5652	2R:26356322-26362523	2616	-	Res	Sus	OK	1.06387	0.523418	1.60431	0	0	0	-1.79769e+308	-1.79769e+308	4.12567e-05	0.000566211	yes
TCONS_00012809	TCONS_00012809	j	XLOC_006871	AGAP002737	AGAP002737-RB	TSS5654	2R:26367256-26405654	17082	-	Res	Sus	OK	0.329737	0.20481	0.454664	0.11227	0.0578534	0.166688	-1.07738	3.50255	0.000460825	0.00417002	yes
TCONS_00012811	TCONS_00012811	j	XLOC_006871	AGAP002737	AGAP002737-RB	TSS5655	2R:26367256-26405654	9844	-	Res	Sus	OK	15.4904	10.6633	20.3176	28.2305	19.0978	37.3632	0.60018	-2.67233	0.00753266	0.0354786	yes
TCONS_00012812	TCONS_00012812	j	XLOC_006871	AGAP002737	AGAP002737-RB	TSS5656	2R:26367256-26405654	5509	-	Res	Sus	OK	73.9206	49.6661	98.1751	253.391	151.691	355.091	1.23194	-4.7528	2.00618e-06	4.17934e-05	yes
TCONS_00012819	TCONS_00012819	j	XLOC_006874	AGAP002742	AGAP002742-RA	TSS5661	2R:26565614-26585956	785	-	Res	Sus	OK	3.03721	1.45736	4.61706	0.375658	0	0.84274	-2.09002	3.10139	0.00192616	0.0131012	yes
TCONS_00012820	TCONS_00012820	j	XLOC_006875	AGAP002748	AGAP002748-RA	TSS5662	2R:26644297-26659713	2172	-	Res	Sus	OK	1.50238	0.785095	2.21966	0.312937	0.0421025	0.583772	-1.5688	3.17438	0.00150157	0.0108028	yes
TCONS_00012861	TCONS_00012861	j	XLOC_006898	AGAP002787	AGAP002787-RA	TSS5693	2R:27223567-27237292	1362	-	Res	Sus	OK	1.42602	0.587673	2.26436	0	0	0	-1.79769e+308	-1.79769e+308	0.000334496	0.00321406	yes
TCONS_00012864	TCONS_00012864	j	XLOC_006899	AGAP002789	AGAP002789-RA	TSS5694	2R:27239268-27242489	3145	-	Res	Sus	OK	3.52358	2.26995	4.77721	0.49438	0.20927	0.779491	-1.96393	5.79655	6.76923e-09	2.74521e-07	yes
TCONS_00012866	TCONS_00012866	j	XLOC_006900	AGAP002790	AGAP002790-RA	TSS5695	2R:27248414-27318988	10167	-	Res	Sus	OK	5.41875	3.72372	7.11378	1.67423	1.11791	2.23055	-1.17451	5.14734	2.642e-07	6.98459e-06	yes
TCONS_00012870	TCONS_00012870	j	XLOC_006903	AGAP002793	AGAP002793-RA	TSS5697	2R:27479770-27631899	8017	-	Res	Sus	OK	3.12956	2.10356	4.15557	1.57919	1.027	2.13139	-0.68398	2.85395	0.00431798	0.0240984	yes
TCONS_00012878	TCONS_00012878	j	XLOC_006907	AGAP002800	AGAP002800-RA	TSS5702	2R:27652883-27655375	2164	-	Res	Sus	OK	0.546869	0.151689	0.94205	0	0	0	-1.79769e+308	-1.79769e+308	0.0028227	0.0175664	yes
TCONS_00012881	TCONS_00012881	j	XLOC_006909	AGAP002802	AGAP002802-RA	TSS5705	2R:27707790-27764796	2425	-	Res	Sus	OK	5.03289	3.23573	6.83004	1.03942	0.501321	1.57751	-1.57733	5.0162	5.27043e-07	1.28337e-05	yes
TCONS_00012890	TCONS_00012890	j	XLOC_006909	AGAP002802	AGAP002802-RA	TSS5707	2R:27707790-27764796	2902	-	Res	Sus	OK	3.51352	2.20263	4.8244	7.27517	4.87467	9.67567	0.72785	-2.92268	0.00347033	0.0204954	yes
TCONS_00012911	TCONS_00012911	j	XLOC_006922	AGAP002826	AGAP002826-RA	TSS5720	2R:28044106-28054784	1619	-	Res	Sus	OK	3.24959	1.79745	4.70173	0.745942	0.193876	1.29801	-1.47164	3.40444	0.00066299	0.00557308	yes
TCONS_00012913	TCONS_00012913	j	XLOC_006923	AGAP002828	AGAP002828-RA	TSS5723	2R:28058136-28068054	5411	-	Res	Sus	OK	2.41316	1.56521	3.2611	0.397443	0.186442	0.608445	-1.80364	5.66602	1.46149e-08	5.51628e-07	yes
TCONS_00012915	TCONS_00012915	j	XLOC_006923	AGAP002828	AGAP002828-RA	TSS5725	2R:28058136-28068054	2351	-	Res	Sus	OK	0.378619	0.0646198	0.692617	2.05267	1.17465	2.93069	1.69037	-3.62297	0.000291241	0.00287353	yes
TCONS_00012933	TCONS_00012933	j	XLOC_006933	AGAP002840	AGAP002840-RA	TSS5734	2R:28213214-28218592	2679	-	Res	Sus	OK	1.25903	0.657684	1.86037	0.252834	0.0328036	0.472865	-1.60536	3.2343	0.00121941	0.00913483	yes
TCONS_00012947	TCONS_00012947	j	XLOC_006941	AGAP002858	AGAP002858-RE	TSS5744	2R:28322912-28394046	10063	-	Res	Sus	OK	34.3537	23.078	45.6294	16.6135	11.3517	21.8753	-0.726492	3.18557	0.00144468	0.0104669	yes
TCONS_00012948	TCONS_00012948	j	XLOC_006941	AGAP002858	AGAP002858-RE	TSS5745	2R:28322912-28394046	9962	-	Res	Sus	OK	11.173	7.71563	14.6303	5.57413	3.84378	7.30449	-0.695362	3.17292	0.00150916	0.0108433	yes
TCONS_00012983	TCONS_00012983	j	XLOC_006965	AGAP002902	AGAP002902-RA	TSS5775	2R:29114216-29122936	5549	-	Res	Sus	OK	7.50679	5.12653	9.88705	4.02144	2.7064	5.33647	-0.624169	2.74063	0.00613219	0.0309224	yes
TCONS_00013020	TCONS_00013020	j	XLOC_006988	AGAP002942	AGAP002942-RA	TSS5812	2R:29870157-29988832	3391	-	Res	Sus	OK	1.13626	0.596254	1.67627	0.242424	0.0386425	0.446206	-1.54481	3.19954	0.00137646	0.010092	yes
TCONS_00013035	TCONS_00013035	j	XLOC_006996	AGAP013267	AGAP013267-RA	TSS5822	2R:30162743-30179057	3669	-	Res	Sus	OK	3.30571	2.1563	4.45513	0.646185	0.328388	0.963983	-1.63232	5.42025	5.95168e-08	1.87308e-06	yes
TCONS_00013039	TCONS_00013039	j	XLOC_006998	AGAP013301	AGAP013301-RA	TSS5825	2R:30206848-30250491	9718	-	Res	Sus	OK	0.993486	0.629835	1.35714	0.236293	0.116208	0.356378	-1.43615	4.58613	4.51538e-06	8.49604e-05	yes
TCONS_00013043	TCONS_00013043	j	XLOC_006998	AGAP013301	AGAP013301-RA	TSS5829	2R:30206848-30250491	7462	-	Res	Sus	OK	1.02559	0.632214	1.41897	0.114354	0.0279503	0.200758	-2.19372	5.17777	2.24557e-07	6.0305e-06	yes
TCONS_00013055	TCONS_00013055	j	XLOC_007007	AGAP002982	AGAP002982-RA	TSS5841	2R:30519179-30529700	9718	-	Res	Sus	OK	1.37849	0.890993	1.86599	0.417493	0.229468	0.605519	-1.19448	4.17195	3.02007e-05	0.000434762	yes
TCONS_00013058	TCONS_00013058	j	XLOC_007008	AGAP002983	AGAP002983-RA	TSS5844	2R:30530220-30539785	4870	-	Res	Sus	OK	0.859379	0.471356	1.2474	0.102008	0	0.205627	-2.13116	3.83432	0.000125913	0.00143076	yes
TCONS_00013063	TCONS_00013063	j	XLOC_007009	AGAP013286	AGAP013286-RC	TSS5847	2R:30549667-30557708	737	-	Res	Sus	OK	7.78757	4.59572	10.9794	18.4958	12.1937	24.7979	0.865015	-3.24585	0.00117102	0.00885347	yes
TCONS_00013076	TCONS_00013076	j	XLOC_007014	AGAP002996	AGAP002996-RD	TSS5854	2R:30730688-30753601	3687	-	Res	Sus	OK	3.48153	2.25539	4.70767	0.235111	0.052746	0.417476	-2.69517	6.3277	2.48848e-10	1.46594e-08	yes
TCONS_00013078	TCONS_00013078	j	XLOC_007014	AGAP002996	AGAP002996-RD	TSS5856	2R:30730688-30753601	3586	-	Res	Sus	OK	2.46878	1.53701	3.40055	0	0	0	-1.79769e+308	-1.79769e+308	5.81797e-08	1.83624e-06	yes
TCONS_00013085	TCONS_00013085	j	XLOC_007018	AGAP002999	AGAP002999-RA	TSS5864	2R:30868226-30903064	568	-	Res	Sus	OK	2.80706	0.950059	4.66406	0	0	0	-1.79769e+308	-1.79769e+308	0.00125051	0.00932663	yes
TCONS_00013119	TCONS_00013119	j	XLOC_007035	AGAP003029	AGAP003029-RA	TSS5890	2R:31248636-31254127	2940	-	Res	Sus	OK	1.41144	0.775846	2.04704	0.231169	0.0323027	0.430035	-1.80922	3.72651	0.000194147	0.00205527	yes
TCONS_00013163	TCONS_00013163	j	XLOC_007062	AGAP003080	AGAP003080-RB	TSS5920	2R:32272667-32291402	5003	-	Res	Sus	OK	5.8455	3.93847	7.75252	1.23589	0.734192	1.73759	-1.55388	5.96743	2.41015e-09	1.11238e-07	yes
TCONS_00013171	TCONS_00013171	j	XLOC_007067	AGAP003090	AGAP003090-RB	TSS5925	2R:32386054-32395229	5897	-	Res	Sus	OK	0.582405	0.308619	0.856191	0.0494841	0	0.111742	-2.46551	3.67137	0.000241255	0.00245897	yes
TCONS_00013179	TCONS_00013179	j	XLOC_007068	AGAP003092	AGAP003092-RD	TSS5930	2R:32401890-32415232	1305	-	Res	Sus	OK	1.54207	0.657494	2.42664	0	0	0	-1.79769e+308	-1.79769e+308	0.00024462	0.00248695	yes
TCONS_00013188	TCONS_00013188	j	XLOC_007075	AGAP003108	AGAP003108-RA	TSS5935	2R:32463553-32501214	5144	-	Res	Sus	OK	5.60423	3.79528	7.41317	2.7705	1.83191	3.70909	-0.704493	3.01109	0.00260312	0.0165429	yes
TCONS_00013203	TCONS_00013203	j	XLOC_007080	AGAP003115	AGAP003115-RA	TSS5942	2R:32675639-32757546	3964	-	Res	Sus	OK	0.924533	0.489493	1.35957	0.250151	0.0656266	0.434675	-1.30722	2.98809	0.00280726	0.0174826	yes
TCONS_00013207	TCONS_00013207	j	XLOC_007082	AGAP013411	AGAP013411-RA	TSS5945	2R:32820864-32876181	15810	-	Res	Sus	OK	0.654065	0.412432	0.895699	0.302072	0.17298	0.431165	-0.772541	2.73513	0.00623551	0.0311585	yes
TCONS_00013234	TCONS_00013234	j	XLOC_007094	AGAP003138	AGAP003138-RA	TSS5966	2R:33132443-33148144	6155	-	Res	Sus	OK	0.26389	0.095762	0.432018	1.19091	0.72602	1.65579	1.50694	-4.03359	5.49306e-05	0.000724142	yes
TCONS_00013242	TCONS_00013242	j	XLOC_007096	AGAP003140	AGAP003140-RB	TSS5971	2R:33159780-33181296	2688	-	Res	Sus	OK	2.74724	1.61945	3.87503	1.13089	0.55706	1.70472	-0.88759	2.71981	0.00653185	0.0322052	yes
TCONS_00013250	TCONS_00013250	j	XLOC_007098	AGAP003143	AGAP003143-RB	TSS5973	2R:33211870-33213560	1449	-	Res	Sus	OK	1.34792	0.505292	2.19054	0.147838	0	0.380259	-2.2102	2.61273	0.00898211	0.0402435	yes
TCONS_00013269	TCONS_00013269	j	XLOC_007112	AGAP003173	AGAP003173-RA	TSS5988	2R:33516461-33525281	957	-	Res	Sus	OK	2.16312	1.04089	3.28534	0	0	0	-1.79769e+308	-1.79769e+308	5.78569e-05	0.00075438	yes
TCONS_00013276	TCONS_00013276	j	XLOC_007113	AGAP003175	AGAP003175-RA	TSS5992	2R:33525704-33566599	4709	-	Res	Sus	OK	0.845119	0.456681	1.23356	0	0	0	-1.79769e+308	-1.79769e+308	6.76445e-06	0.000120253	yes
TCONS_00013284	TCONS_00013284	j	XLOC_007117	AGAP003182	AGAP003182-RA	TSS5998	2R:33613680-33617761	3774	-	Res	Sus	OK	1.41906	0.817866	2.02025	0.469708	0.20283	0.736585	-1.10564	3.12002	0.00180841	0.0124851	yes
TCONS_00013295	TCONS_00013295	j	XLOC_007119	AGAP003187	AGAP003187-RA	TSS6006	2R:33653316-33690660	7038	-	Res	Sus	OK	1.87961	1.22004	2.53918	0.732937	0.429298	1.03658	-0.941759	3.46923	0.000521946	0.00459127	yes
TCONS_00013305	TCONS_00013305	j	XLOC_007124	AGAP003195	AGAP003195-RA	TSS6011	2R:33743871-33776983	1242	-	Res	Sus	OK	2.8669	1.46847	4.26534	0	0	0	-1.79769e+308	-1.79769e+308	2.06427e-05	0.000312567	yes
TCONS_00013313	TCONS_00013313	j	XLOC_007126	AGAP012981	AGAP012981-RA	TSS6015	2R:33780338-33812924	1936	-	Res	Sus	OK	17.8103	12.092	23.5285	3.85507	2.36284	5.3473	-1.53039	6.08616	1.15648e-09	5.87198e-08	yes
TCONS_00013327	TCONS_00013327	j	XLOC_007134	AGAP003221	AGAP003221-RA	TSS6026	2R:34017960-34028112	4987	-	Res	Sus	OK	0.736542	0.38662	1.08646	0.0789781	0	0.170374	-2.2328	3.56975	0.000357322	0.00339787	yes
TCONS_00013329	TCONS_00013329	j	XLOC_007135	AGAP003222	AGAP003222-RA	TSS6027	2R:34028365-34033998	2939	-	Res	Sus	OK	1.64142	0.886902	2.39593	0.112134	0	0.261013	-2.68362	3.82008	0.000133407	0.00150469	yes
TCONS_00013336	TCONS_00013336	j	XLOC_007139	AGAP003232	AGAP003232-RA	TSS6031	2R:34060206-34066121	4328	-	Res	Sus	OK	4.50283	3.00739	5.99827	0.547225	0.271081	0.823369	-2.1076	6.97757	3.00338e-12	2.67173e-10	yes
TCONS_00013341	TCONS_00013341	j	XLOC_007143	AGAP003235	AGAP003235-RA	TSS6036	2R:34232309-34300452	3902	-	Res	Sus	OK	3.53069	2.30167	4.75971	1.58598	0.959884	2.21208	-0.800291	3.04107	0.0023574	0.0153144	yes
TCONS_00013347	TCONS_00013347	j	XLOC_007147	AGAP003240	AGAP003240-RA	TSS6042	2R:34373886-34377676	2552	-	Res	Sus	OK	15.2307	10.3791	20.0823	7.77161	5.20604	10.3372	-0.672835	2.93336	0.0033531	0.0199472	yes
TCONS_00013364	TCONS_00013364	j	XLOC_007158	DH44	AGAP003269-RA	TSS6052	2R:34687264-34740306	4942	-	Res	Sus	OK	5.81341	3.93488	7.69195	1.43861	0.891608	1.98562	-1.39649	5.59723	2.17802e-08	7.76259e-07	yes
TCONS_00013382	TCONS_00013382	j	XLOC_007167	AGAP003282	AGAP003282-RB	TSS6068	2R:34774190-34873476	10486	-	Res	Sus	OK	3.07106	2.07796	4.06415	1.31156	0.854837	1.76829	-0.850803	3.58068	0.000342704	0.00327865	yes
TCONS_00013396	TCONS_00013396	j	XLOC_007174	AGAP003289	AGAP003289-RA	TSS6079	2R:35082123-35085308	1739	-	Res	Sus	OK	3.72441	2.16266	5.28617	0.199469	0	0.455526	-2.92701	4.33488	1.45843e-05	0.000231393	yes
TCONS_00013408	TCONS_00013408	j	XLOC_007181	AGAP003301	AGAP003301-RA	TSS6088	2R:35250357-35341740	3573	-	Res	Sus	OK	2.1935	1.33458	3.05243	0.492893	0.205506	0.780279	-1.49296	4.25135	2.12488e-05	0.000320095	yes
TCONS_00013415	TCONS_00013415	j	XLOC_007184	AGAP003308	AGAP003308-RB	TSS6091	2R:35613939-35629130	1132	-	Res	Sus	OK	4.02094	2.23144	5.81044	0.506541	0.00813156	1.00495	-2.07167	3.83672	0.000124689	0.00141832	yes
TCONS_00013424	TCONS_00013424	j	XLOC_007190	AGAP003318	AGAP003318-RB	TSS6099	2R:35897889-35933272	7240	-	Res	Sus	OK	8.50263	5.84925	11.156	4.55902	3.09729	6.02075	-0.623268	2.78606	0.00533535	0.0279387	yes
TCONS_00013428	TCONS_00013428	j	XLOC_007191	AGAP003320	AGAP003320-RA	TSS6102	2R:35938831-35961703	6832	-	Res	Sus	OK	2.29622	1.50594	3.08649	0.445119	0.229206	0.661033	-1.64067	5.51709	3.44668e-08	1.15649e-06	yes
TCONS_00013443	TCONS_00013443	j	XLOC_007199	GPRNNA7	AGAP003335-RA	TSS6116	2R:36169421-36276687	3076	-	Res	Sus	OK	0.376195	0.100005	0.652385	0	0	0	-1.79769e+308	-1.79769e+308	0.00322312	0.0193725	yes
TCONS_00013444	TCONS_00013444	j	XLOC_007199	GPRNNA7	AGAP003335-RA	TSS6117	2R:36169421-36276687	2704	-	Res	Sus	OK	1.69702	0.943405	2.45064	0	0	0	-1.79769e+308	-1.79769e+308	3.33953e-06	6.5518e-05	yes
TCONS_00013457	TCONS_00013457	j	XLOC_007207	AGAP003346	AGAP003346-RA	TSS6125	2R:36329248-36333258	3325	-	Res	Sus	OK	4.81892	3.18188	6.45596	2.35869	1.47839	3.239	-0.714442	2.83131	0.0046358	0.0253276	yes
TCONS_00013499	TCONS_00013499	j	XLOC_007235	AGAP003398	AGAP003398-RE	TSS6164	2R:37299454-37403351	1435	-	Res	Sus	OK	24.0984	16.3964	31.8004	7.61153	4.90195	10.3211	-1.15248	4.81801	1.45001e-06	3.14237e-05	yes
TCONS_00013506	TCONS_00013506	j	XLOC_007235	AGAP003398	AGAP003398-RE	TSS6164	2R:37299454-37403351	1412	-	Res	Sus	OK	3.54549	2.02271	5.06828	0	0	0	-1.79769e+308	-1.79769e+308	1.60746e-06	3.44468e-05	yes
TCONS_00013511	TCONS_00013511	j	XLOC_007236	AGAP003400	AGAP003400-RA	TSS6166	2R:37299454-37403351	5324	-	Res	Sus	OK	1.23309	0.731472	1.73471	0	0	0	-1.79769e+308	-1.79769e+308	4.40648e-07	1.09722e-05	yes
TCONS_00013514	TCONS_00013514	j	XLOC_007238	AGAP003405	AGAP003405-RA	TSS6168	2R:37425157-37436869	4057	-	Res	Sus	OK	11.98	8.22454	15.7355	0.576999	0.282866	0.871132	-3.03316	10.1369	0	0	yes
TCONS_00013542	TCONS_00013542	j	XLOC_007255	AGAP003434	AGAP003434-RA	TSS6188	2R:37703243-37711151	5051	-	Res	Sus	OK	0.992453	0.57757	1.40733	0.128149	0.0192217	0.237076	-2.04699	4.322	1.5462e-05	0.000243567	yes
TCONS_00013567	TCONS_00013567	j	XLOC_007273	AGAP003464	AGAP003464-RA	TSS6196	2R:37966834-37969285	1877	-	Res	Sus	OK	0.521437	0.0917125	0.951161	0	0	0	-1.79769e+308	-1.79769e+308	0.00761541	0.0358187	yes
TCONS_00013594	TCONS_00013594	j	XLOC_007290	AGAP003486	AGAP003486-RA	TSS6217	2R:38588728-38597566	3395	-	Res	Sus	OK	1.31841	0.735445	1.90137	0.191512	0.021082	0.361941	-1.92923	3.88286	0.000103233	0.00121175	yes
TCONS_00013627	TCONS_00013627	j	XLOC_007306	AGAP003508	AGAP003508-RA	TSS6243	2R:38776218-38785911	2661	-	Res	Sus	OK	1.66036	0.942227	2.37849	0.261764	0.0459691	0.477558	-1.84735	3.9687	7.22659e-05	0.000907137	yes
TCONS_00013638	TCONS_00013638	j	XLOC_007312	AGAP003519	AGAP003519-RA	TSS6250	2R:39077844-39103877	13964	-	Res	Sus	OK	1.9069	1.28568	2.52812	0.214589	0.110765	0.318412	-2.18451	7.49041	6.86118e-14	8.07295e-12	yes
TCONS_00013643	TCONS_00013643	j	XLOC_007315	AGAP003525	AGAP003525-RB	TSS6253	2R:39130108-39140659	1475	-	Res	Sus	OK	5.63893	3.51217	7.76569	0	0	0	-1.79769e+308	-1.79769e+308	5.70071e-08	1.8031e-06	yes
TCONS_00013644	TCONS_00013644	j	XLOC_007315	AGAP003525	AGAP003525-RB	TSS6254	2R:39130108-39140659	2030	-	Res	Sus	OK	4.21033	2.63901	5.78166	0.681762	0.264189	1.09933	-1.82062	5.07675	3.83937e-07	9.708e-06	yes
TCONS_00013663	TCONS_00013663	j	XLOC_007327	AGAP003542	AGAP003542-RA	TSS6268	2R:39352818-39356978	2154	-	Res	Sus	OK	0.604531	0.190325	1.01874	0	0	0	-1.79769e+308	-1.79769e+308	0.00175583	0.0121965	yes
TCONS_00013668	TCONS_00013668	j	XLOC_007330	AGAP003546	AGAP003546-RB	TSS6272	2R:39365614-39418293	6521	-	Res	Sus	OK	3.00061	1.99373	4.00748	0.552143	0.297823	0.806463	-1.69276	5.94084	2.83562e-09	1.27409e-07	yes
TCONS_00013672	TCONS_00013672	j	XLOC_007330	AGAP003546	AGAP003546-RB	TSS6275	2R:39365614-39418293	7894	-	Res	Sus	OK	0.487254	0.259115	0.715392	0	0	0	-1.79769e+308	-1.79769e+308	9.70544e-06	0.000163886	yes
TCONS_00013687	TCONS_00013687	j	XLOC_007339	AGAP003570	AGAP003570-RA	TSS6289	2R:39722202-39742953	4315	-	Res	Sus	OK	1.09902	0.626898	1.57114	0.228969	0.0655397	0.392398	-1.56859	3.76582	0.000166002	0.00180763	yes
TCONS_00013695	TCONS_00013695	j	XLOC_007343	AGAP013217	AGAP013217-RA	TSS6299	2R:40050719-40063191	2915	-	Res	Sus	OK	1.29212	0.677781	1.90645	0.176192	0	0.362197	-1.99246	3.44175	0.000577965	0.00498661	yes
TCONS_00013741	TCONS_00013741	j	XLOC_007377	AGAP003638	AGAP003638-RA	TSS6339	2R:40812761-40877140	7772	-	Res	Sus	OK	16.6779	11.5074	21.8485	9.54714	6.58527	12.509	-0.557845	2.54381	0.0109652	0.0457986	yes
TCONS_00013759	TCONS_00013759	j	XLOC_007391	AGAP003656	AGAP003656-RA	TSS6356	2R:41116498-41215501	12856	-	Res	Sus	OK	1.72185	1.14921	2.2945	0.66948	0.417465	0.921495	-0.944655	3.76129	0.000169041	0.00183619	yes
TCONS_00013762	TCONS_00013762	j	XLOC_007391	AGAP003656	AGAP003656-RA	TSS6358	2R:41116498-41215501	11812	-	Res	Sus	OK	1.97285	1.31871	2.62699	0.865709	0.549818	1.1816	-0.823684	3.34126	0.000833999	0.00674089	yes
TCONS_00013793	TCONS_00013793	j	XLOC_007406	AGAP003680	AGAP003680-RA	TSS6382	2R:41860406-41916847	4698	-	Res	Sus	OK	1.61508	0.983845	2.24632	7.29832	4.97543	9.62121	1.50826	-5.98469	2.16803e-09	1.01335e-07	yes
TCONS_00013794	TCONS_00013794	j	XLOC_007406	AGAP003680	AGAP003680-RA	TSS6383	2R:41860406-41916847	4945	-	Res	Sus	OK	3.94185	2.6289	5.25481	15.0312	10.3762	19.6863	1.33848	-5.88589	3.9592e-09	1.71941e-07	yes
TCONS_00013802	TCONS_00013802	j	XLOC_007412	AGAP003691	AGAP003691-RA	TSS6392	2R:42045502-42098290	2735	-	Res	Sus	OK	3.57846	2.25607	4.90085	50.8789	35.0234	66.7344	2.65452	-10.9827	0	0	yes
TCONS_00013805	TCONS_00013805	j	XLOC_007413	AGAP013146	AGAP013146-RB	TSS6394	2R:42045502-42098290	3179	-	Res	Sus	OK	32.8263	22.6541	42.9985	14.3482	9.83994	18.8564	-0.827607	3.75074	0.000176315	0.00189976	yes
TCONS_00013809	TCONS_00013809	j	XLOC_007413	AGAP013146	AGAP013146-RB	TSS6394	2R:42045502-42098290	3015	-	Res	Sus	OK	17.6023	12.077	23.1276	9.49449	6.43206	12.5569	-0.617317	2.74316	0.00608517	0.0307485	yes
TCONS_00013813	TCONS_00013813	j	XLOC_007414	AGAP013188	AGAP013188-RA	TSS6398	2R:42045502-42098290	2951	-	Res	Sus	OK	24.3564	16.7718	31.9409	6.84191	4.56319	9.12063	-1.26973	5.56954	2.55414e-08	8.90879e-07	yes
TCONS_00013826	TCONS_00013826	j	XLOC_007423	AGAP003709	AGAP003709-RC	TSS6409	2R:42216447-42287351	4905	-	Res	Sus	OK	2.27407	1.45253	3.0956	0.587766	0.302265	0.873266	-1.353	4.4701	7.81827e-06	0.000135867	yes
TCONS_00013835	TCONS_00013835	j	XLOC_007423	AGAP003709	AGAP003709-RC	TSS6414	2R:42216447-42287351	1795	-	Res	Sus	OK	2.63212	1.47358	3.79066	0.471986	0.0913202	0.852652	-1.71859	3.74092	0.000183351	0.00196216	yes
TCONS_00013855	TCONS_00013855	j	XLOC_007431	AGAP003725	AGAP003725-RA	TSS6429	2R:42439235-42468970	3471	-	Res	Sus	OK	3.66908	2.37335	4.96482	1.41395	0.818488	2.00942	-0.953552	3.46994	0.000520584	0.00458112	yes
TCONS_00013861	TCONS_00013861	j	XLOC_007434	AGAP003730	AGAP003730-RA	TSS6434	2R:42636769-42641314	3967	-	Res	Sus	OK	6.12411	4.12927	8.11895	11.2801	7.7522	14.808	0.610805	-2.70523	0.00682568	0.033194	yes
TCONS_00013872	TCONS_00013872	j	XLOC_007439	AGAP003735	AGAP003735-RA	TSS6444	2R:42676995-42763921	10076	-	Res	Sus	OK	0.673788	0.40154	0.946036	0.0963411	0.0237659	0.168916	-1.94502	4.55063	5.34862e-06	9.81686e-05	yes
TCONS_00013877	TCONS_00013877	j	XLOC_007440	AGAP013455	AGAP013455-RA	TSS6447	2R:42769017-42784997	3727	-	Res	Sus	OK	0.72826	0.339747	1.11677	0.18947	0.0129331	0.366006	-1.34643	2.50811	0.0121378	0.0493326	yes
TCONS_00013878	TCONS_00013878	j	XLOC_007440	AGAP013455	AGAP013455-RA	TSS6447	2R:42769017-42784997	3706	-	Res	Sus	OK	1.74708	1.01615	2.47801	0	0	0	-1.79769e+308	-1.79769e+308	8.74592e-07	2.02783e-05	yes
TCONS_00013879	TCONS_00013879	j	XLOC_007440	AGAP013455	AGAP013455-RA	TSS6448	2R:42769017-42784997	2733	-	Res	Sus	OK	0.691918	0.277894	1.10594	0	0	0	-1.79769e+308	-1.79769e+308	0.000415282	0.0038398	yes
TCONS_00013903	TCONS_00013903	j	XLOC_007451	AGAP013467	AGAP013467-RA	TSS6463	2R:43073587-43076657	2879	-	Res	Sus	OK	0.999508	0.49154	1.50748	0.0994821	0	0.229922	-2.30728	3.28149	0.00103259	0.00801708	yes
TCONS_00013923	TCONS_00013923	j	XLOC_007467	AGAP003789	AGAP003789-RC	TSS6481	2R:43164768-43328912	2882	-	Res	Sus	OK	1.81323	1.03423	2.59223	0.388487	0.11683	0.660145	-1.5406	3.75435	0.000173794	0.00187857	yes
TCONS_00013960	TCONS_00013960	j	XLOC_007487	AGAP003823	AGAP003823-RB	TSS6514	2R:43771687-43795498	4362	-	Res	Sus	OK	12.9955	8.93733	17.0537	4.82169	3.23536	6.40803	-0.99148	4.37157	1.23358e-05	0.000200772	yes
TCONS_00013984	TCONS_00013984	j	XLOC_007506	AGAP003853	AGAP003853-RA	TSS6525	2R:44558365-44563348	4112	-	Res	Sus	OK	0.817131	0.415012	1.21925	3.07364	1.99603	4.15125	1.32482	-4.38516	1.15903e-05	0.000190678	yes
TCONS_00013985	TCONS_00013985	j	XLOC_007506	AGAP003853	AGAP003853-RA	TSS6525	2R:44558365-44563348	4362	-	Res	Sus	OK	1.41529	0.822663	2.00793	3.26963	2.14376	4.39551	0.837341	-3.08905	0.00200798	0.0135451	yes
TCONS_00014001	TCONS_00014001	j	XLOC_007515	AGAP003867	AGAP003867-RA	TSS6540	2R:44698524-44702877	1948	-	Res	Sus	OK	6.98546	4.52348	9.44745	0.380119	0.0468783	0.71336	-2.9111	6.16192	7.18671e-10	3.8297e-08	yes
TCONS_00014006	TCONS_00014006	j	XLOC_007518	AGAP003872	AGAP003872-RA	TSS6545	2R:44846764-44896139	12782	-	Res	Sus	OK	0.782231	0.494962	1.0695	0.248691	0.13137	0.366012	-1.14594	3.83356	0.000126303	0.00143445	yes
TCONS_00014018	TCONS_00014018	j	XLOC_007525	AGAP003887	AGAP003887-RA	TSS6552	2R:45555236-45601867	2751	-	Res	Sus	OK	2.59847	1.57936	3.61758	1.13772	0.600741	1.6747	-0.825896	2.6917	0.00710891	0.0342057	yes
TCONS_00014049	TCONS_00014049	j	XLOC_007542	AGAP003925	AGAP003925-RA	TSS6572	2R:46336123-46357201	7179	-	Res	Sus	OK	3.62316	2.44751	4.79881	1.40232	0.905287	1.89935	-0.949221	3.9507	7.79245e-05	0.00096499	yes
TCONS_00014070	TCONS_00014070	j	XLOC_007553	AGAP003944	AGAP003944-RA	TSS6587	2R:46650308-46687838	4117	-	Res	Sus	OK	0.608045	0.283773	0.932318	0.0660264	0	0.155476	-2.2202	3.04982	0.00228978	0.0149721	yes
TCONS_00014142	TCONS_00014142	j	XLOC_007594	AGAP004033	AGAP004033-RA	TSS6639	2R:48125097-48149667	3317	-	Res	Sus	OK	3.45929	2.21084	4.70774	0.781405	0.389281	1.17353	-1.48772	4.81372	1.48144e-06	3.2042e-05	yes
TCONS_00014148	TCONS_00014148	j	XLOC_007598	AGAP004039	AGAP004039-RB	TSS6644	2R:48273978-48343509	9215	-	Res	Sus	OK	4.08547	2.77996	5.39097	1.97377	1.31423	2.6333	-0.727491	3.14693	0.00164996	0.0116184	yes
TCONS_00014151	TCONS_00014151	j	XLOC_007598	AGAP004039	AGAP004039-RB	TSS6647	2R:48273978-48343509	7070	-	Res	Sus	OK	14.1894	9.78352	18.5953	7.52416	5.1789	9.86942	-0.634375	2.88376	0.00392958	0.0224359	yes
TCONS_00014176	TCONS_00014176	j	XLOC_007613	AGAP013121	AGAP013121-RA	TSS6668	2R:49387666-49441201	4802	-	Res	Sus	OK	3.01538	1.96783	4.06294	0.429997	0.19561	0.664384	-1.9477	6.02646	1.6759e-09	8.0992e-08	yes
TCONS_00014189	TCONS_00014189	j	XLOC_007623	AGAP004087	AGAP004087-RA	TSS6677	2R:49529950-49534956	2490	-	Res	Sus	OK	0.73689	0.303309	1.17047	0	0	0	-1.79769e+308	-1.79769e+308	0.000338052	0.00324046	yes
TCONS_00014199	TCONS_00014199	j	XLOC_007628	AGAP004095	AGAP004095-RA	TSS6683	2R:49723319-49725286	781	-	Res	Sus	OK	3.53762	1.68562	5.38962	0.165337	0	0.456029	-3.06323	3.33963	0.000838894	0.00677549	yes
TCONS_00014205	TCONS_00014205	j	XLOC_007632	AGAP004106	AGAP004106-RA	TSS6689	2R:49826510-49967667	2071	-	Res	Sus	OK	1.87882	1.01639	2.74124	0.492199	0.139954	0.844444	-1.33951	3.15099	0.00162716	0.0114909	yes
TCONS_00014215	TCONS_00014215	j	XLOC_007638	AGAP004115	AGAP004115-RA	TSS6696	2R:50167815-50178488	1722	-	Res	Sus	OK	4.47011	2.68542	6.2548	0.855699	0.299396	1.412	-1.65325	4.33399	1.46429e-05	0.000232156	yes
TCONS_00014236	TCONS_00014236	j	XLOC_007655	AGAP013023	AGAP013023-RB	TSS6719	2R:50672412-50682303	1891	-	Res	Sus	OK	2.79271	1.61654	3.96888	1.02985	0.469981	1.58972	-0.997601	2.9013	0.00371613	0.0214982	yes
TCONS_00014262	TCONS_00014262	j	XLOC_007668	AGAP004169	AGAP004169-RB	TSS6733	2R:51025315-51147282	3335	-	Res	Sus	OK	0.273707	0.065522	0.481892	0	0	0	-1.79769e+308	-1.79769e+308	0.00427604	0.0239067	yes
TCONS_00014266	TCONS_00014266	j	XLOC_007668	AGAP004169	AGAP004169-RB	TSS6734	2R:51025315-51147282	3833	-	Res	Sus	OK	6.87895	4.6676	9.0903	0.609771	0.311694	0.907848	-2.42314	8.28333	2.22045e-16	4.25968e-14	yes
TCONS_00014304	TCONS_00014304	j	XLOC_007686	AGAP004209	AGAP004209-RA	TSS6759	2R:51878129-51908860	14373	-	Res	Sus	OK	1.78548	1.20222	2.36873	0.134794	0.0612419	0.208346	-2.58369	8.12519	4.44089e-16	7.80659e-14	yes
TCONS_00014311	TCONS_00014311	j	XLOC_007688	AGAP004211	AGAP004211-RA	TSS6764	2R:51919191-51934676	4543	-	Res	Sus	OK	2.88626	1.88783	3.8847	0.798366	0.445342	1.15139	-1.28515	4.57823	4.68938e-06	8.77107e-05	yes
TCONS_00014313	TCONS_00014313	j	XLOC_007688	AGAP004211	AGAP004211-RA	TSS6766	2R:51919191-51934676	5422	-	Res	Sus	OK	1.51028	0.940759	2.0798	0.271615	0.111551	0.431679	-1.71566	4.90449	9.36713e-07	2.14259e-05	yes
TCONS_00014339	TCONS_00014339	j	XLOC_007698	AGAP004234	AGAP004234-RA	TSS6784	2R:52930442-52952709	1871	-	Res	Sus	OK	5.29797	3.36058	7.23536	1.76892	0.950012	2.58783	-1.09695	3.71879	0.000200177	0.00210848	yes
TCONS_00014340	TCONS_00014340	j	XLOC_007698	AGAP004234	AGAP004234-RA	TSS6785	2R:52930442-52952709	1852	-	Res	Sus	OK	7.26081	4.68067	9.84095	3.45843	2.06154	4.85533	-0.741675	2.75728	0.00582836	0.0298058	yes
TCONS_00014347	TCONS_00014347	j	XLOC_007702	AGAP012952	AGAP012952-RA	TSS6791	2R:52983319-52986319	2421	-	Res	Sus	OK	1.51088	0.80537	2.21639	0.199447	0	0.406429	-2.0249	3.55871	0.000372685	0.00352271	yes
TCONS_00014350	TCONS_00014350	j	XLOC_007704	AGAP004244	AGAP004244-RA	TSS6792	2R:53005428-53128205	1113	-	Res	Sus	OK	1.89412	0.82479	2.96346	0.331161	0	0.726134	-1.74391	2.64317	0.00821343	0.0378685	yes
TCONS_00014354	TCONS_00014354	j	XLOC_007704	AGAP004244	AGAP004244-RA	TSS6795	2R:53005428-53128205	5032	-	Res	Sus	OK	0.912573	0.506532	1.31861	0.285168	0.10721	0.463127	-1.16319	3.03536	0.00240245	0.015543	yes
TCONS_00014372	TCONS_00014372	j	XLOC_007714	AGAP004256	AGAP004256-RB	TSS6808	2R:53330420-53400875	9162	-	Res	Sus	OK	4.03081	2.73685	5.32477	2.09159	1.38799	2.7952	-0.656041	2.82174	0.00477634	0.0258966	yes
TCONS_00014399	TCONS_00014399	j	XLOC_007727	AGAP004280	AGAP004280-RA	TSS6832	2R:53721996-53799235	4863	-	Res	Sus	OK	0.367438	0.159719	0.575156	0	0	0	-1.79769e+308	-1.79769e+308	0.000201709	0.00212158	yes
TCONS_00014401	TCONS_00014401	j	XLOC_007727	AGAP004280	AGAP004280-RA	TSS6834	2R:53721996-53799235	4123	-	Res	Sus	OK	1.8612	1.1589	2.5635	0	0	0	-1.79769e+308	-1.79769e+308	5.78111e-08	1.82722e-06	yes
TCONS_00014419	TCONS_00014419	j	XLOC_007739	AGAP004297	AGAP004297-RB	TSS6842	2R:54160059-54162527	1814	-	Res	Sus	OK	4.33952	2.68842	5.99062	0.597331	0.187802	1.00686	-1.98305	5.05816	4.23329e-07	1.05887e-05	yes
TCONS_00014449	TCONS_00014449	j	XLOC_007754	AGAP004323	AGAP004323-RA	TSS6855	2R:54461592-54491408	2227	-	Res	Sus	OK	0.610191	0.19036	1.03002	0	0	0	-1.79769e+308	-1.79769e+308	0.00182551	0.0125776	yes
TCONS_00014476	TCONS_00014476	j	XLOC_007772	AGAP004361	AGAP004361-RA	TSS6878	2R:55042520-55053814	6251	-	Res	Sus	OK	2.18743	1.42222	2.95263	0.120144	0.0185728	0.221715	-2.90179	6.3432	2.25038e-10	1.33819e-08	yes
TCONS_00014480	TCONS_00014480	j	XLOC_007774	AGAP004363	AGAP004363-RA	TSS6882	2R:55068680-55074378	4336	-	Res	Sus	OK	0.921706	0.499676	1.34374	0	0	0	-1.79769e+308	-1.79769e+308	6.27057e-06	0.000112379	yes
TCONS_00014481	TCONS_00014481	j	XLOC_007774	AGAP004363	AGAP004363-RA	TSS6883	2R:55068680-55074378	3623	-	Res	Sus	OK	1.50256	0.86909	2.13603	0.571598	0.265349	0.877847	-0.966491	2.83527	0.00457864	0.0251023	yes
TCONS_00014489	TCONS_00014489	j	XLOC_007780	AGAP004373	AGAP004373-RA	TSS6888	2R:55424924-55464112	1442	-	Res	Sus	OK	5.55341	3.29834	7.80848	17.391	11.6345	23.1475	1.14154	-4.35798	1.3127e-05	0.000211697	yes
TCONS_00014502	TCONS_00014502	j	XLOC_007789	AGAP004391	AGAP004391-RA	TSS6896	2R:55560767-55570252	1660	-	Res	Sus	OK	27.9312	19.0338	36.8286	14.4545	9.68233	19.2267	-0.658739	2.87175	0.00408204	0.0230913	yes
TCONS_00014510	TCONS_00014510	j	XLOC_007793	AGAP004402	AGAP004402-RA	TSS6902	2R:55666340-55698426	3654	-	Res	Sus	OK	3.77705	2.45593	5.09816	1.03094	0.564108	1.49777	-1.29847	4.53871	5.65999e-06	0.000102984	yes
TCONS_00014516	TCONS_00014516	j	XLOC_007796	AGAP004409	AGAP004409-RA	TSS6905	2R:55816406-55820118	3433	-	Res	Sus	OK	3.54701	2.26177	4.83224	0.925957	0.474321	1.37759	-1.34303	4.42068	9.83901e-06	0.000165697	yes
TCONS_00014524	TCONS_00014524	j	XLOC_007802	AGAP004423	AGAP004423-RA	TSS6910	2R:55860721-55884594	1825	-	Res	Sus	OK	3.87777	2.3277	5.42784	1.62164	0.827434	2.41584	-0.871825	2.75818	0.00581251	0.029742	yes
TCONS_00014531	TCONS_00014531	j	XLOC_007804	AGAP004428	AGAP004428-RA	TSS6915	2R:55887373-55932349	3404	-	Res	Sus	OK	30.9003	21.3356	40.4651	16.281	11.2072	21.3547	-0.640769	2.91764	0.00352694	0.0207659	yes
TCONS_00014548	TCONS_00014548	j	XLOC_007812	AGAP004438	AGAP004438-RA	TSS6928	2R:56013818-56026116	6277	-	Res	Sus	OK	1.39384	0.864622	1.92307	0	0	0	-1.79769e+308	-1.79769e+308	6.91378e-08	2.13028e-06	yes
TCONS_00014549	TCONS_00014549	j	XLOC_007812	AGAP004438	AGAP004438-RA	TSS6928	2R:56013818-56026116	6275	-	Res	Sus	OK	0.702884	0.386582	1.01919	2.9978	2.0017	3.9939	1.45044	-5.18583	2.15058e-07	5.81435e-06	yes
TCONS_00014550	TCONS_00014550	j	XLOC_007812	AGAP004438	AGAP004438-RA	TSS6928	2R:56013818-56026116	6178	-	Res	Sus	OK	2.3127	1.50863	3.11678	0.311897	0.138565	0.485229	-2.0035	6.11261	9.80167e-10	5.08201e-08	yes
TCONS_00014551	TCONS_00014551	j	XLOC_007812	AGAP004438	AGAP004438-RA	TSS6930	2R:56013818-56026116	2986	-	Res	Sus	OK	1.74662	1.01554	2.47769	0	0	0	-1.79769e+308	-1.79769e+308	8.84259e-07	2.04487e-05	yes
TCONS_00014556	TCONS_00014556	j	XLOC_007813	AGAP004440	AGAP004440-RB	TSS6933	2R:56028998-56087380	13678	-	Res	Sus	OK	2.77431	1.89543	3.65319	0.403643	0.242283	0.565003	-1.92763	7.55838	4.08562e-14	5.0075e-12	yes
TCONS_00014560	TCONS_00014560	j	XLOC_007813	AGAP004440	AGAP004440-RB	TSS6935	2R:56028998-56087380	1458	-	Res	Sus	OK	18.6388	12.5998	24.6777	9.34222	6.14023	12.5442	-0.6907	2.9289	0.00340161	0.0201869	yes
TCONS_00014562	TCONS_00014562	j	XLOC_007814	AGAP004450	AGAP004450-RB	TSS6936	2R:56347495-56374324	629	-	Res	Sus	OK	1.34972	0.194111	2.50532	0	0	0	-1.79769e+308	-1.79769e+308	0.009747	0.0425472	yes
TCONS_00014581	TCONS_00014581	j	XLOC_007826	AGAP004473	AGAP004473-RA	TSS6948	2R:56734478-56740059	4835	-	Res	Sus	OK	1.31292	0.782474	1.84338	0.361411	0.158093	0.56473	-1.29	3.725	0.000195317	0.00206567	yes
TCONS_00014591	TCONS_00014591	j	XLOC_007832	AGAP004486	AGAP004486-RA	TSS6959	2R:56838409-56843384	2751	-	Res	Sus	OK	3.91946	2.48847	5.35044	10.474	7.10311	13.845	0.982946	-4.03924	5.36245e-05	0.000709042	yes
TCONS_00014619	TCONS_00014619	j	XLOC_007848	AGAP004516	AGAP004516-RA	TSS6977	2R:57254556-57259803	1116	-	Res	Sus	OK	5.13219	3.02103	7.24334	1.09722	0.38679	1.80765	-1.54275	4.02228	5.76382e-05	0.00075264	yes
TCONS_00014623	TCONS_00014623	j	XLOC_007849	AGAP004518	AGAP004518-RA	TSS6979	2R:57282173-57309900	6858	-	Res	Sus	OK	4.0056	2.69238	5.31883	0.357231	0.169123	0.54534	-2.41707	7.7933	6.43929e-15	8.90661e-13	yes
TCONS_00014626	TCONS_00014626	j	XLOC_007850	AGAP004519	AGAP004519-RA	TSS6980	2R:57327172-57329964	2035	-	Res	Sus	OK	5.26917	3.26153	7.27681	0	0	0	-1.79769e+308	-1.79769e+308	7.64121e-08	2.32359e-06	yes
TCONS_00014629	TCONS_00014629	j	XLOC_007852	AGAP004522	AGAP004522-RA	TSS6982	2R:57346063-57349383	3016	-	Res	Sus	OK	10.5081	7.11377	13.9024	5.56833	3.69286	7.44381	-0.635049	2.72161	0.0064965	0.0321027	yes
TCONS_00014641	TCONS_00014641	j	XLOC_007858	AGAP004533	AGAP004533-RA	TSS6994	2R:57453798-57455738	1248	-	Res	Sus	OK	65.0375	44.8584	85.2167	13.9358	9.24342	18.6282	-1.5405	6.72903	1.70801e-11	1.30385e-09	yes
TCONS_00014680	TCONS_00014680	j	XLOC_007877	ANCE9	AGAP004563-RA	TSS7021	2R:57617243-57622835	4634	-	Res	Sus	OK	6.07341	4.1068	8.04002	0.496108	0.240293	0.751923	-2.50488	8.22779	2.22045e-16	4.09928e-14	yes
TCONS_00014696	TCONS_00014696	j	XLOC_007889	AGAP004574	AGAP004574-RA	TSS7032	2R:57710257-57736487	1956	-	Res	Sus	OK	4.59654	2.83798	6.35511	1.22074	0.576021	1.86545	-1.32585	4.06609	4.7808e-05	0.000643512	yes
TCONS_00014714	TCONS_00014714	j	XLOC_007903	GPRGBB2	AGAP004595-RA	TSS7052	2R:58201116-58238162	4524	-	Res	Sus	OK	2.37807	1.51242	3.24371	0.677696	0.352164	1.00323	-1.25534	4.16576	3.10316e-05	0.000444692	yes
TCONS_00014722	TCONS_00014722	j	XLOC_007906	AGAP004604	AGAP004604-RA	TSS7060	2R:58275009-58333609	5832	-	Res	Sus	OK	2.2841	1.4793	3.0889	0.988536	0.589642	1.38743	-0.837502	3.12673	0.00176762	0.0122592	yes
TCONS_00014728	TCONS_00014728	j	XLOC_007908	AGAP004608	AGAP004608-RA	TSS7062	2R:58346782-58355258	5099	-	Res	Sus	OK	1.71143	1.06499	2.35788	0.371843	0.167292	0.576394	-1.52661	4.57552	4.75035e-06	8.84761e-05	yes
TCONS_00014732	TCONS_00014732	j	XLOC_007911	AGAP004612	AGAP004612-RA	TSS7064	2R:58391260-58394400	2706	-	Res	Sus	OK	2.41505	1.43256	3.39754	1.03423	0.526965	1.54149	-0.848067	2.66172	0.00777427	0.0363296	yes
TCONS_00014739	TCONS_00014739	j	XLOC_007914	AGAP004619	AGAP004619-RA	TSS7071	2R:58527200-58613912	3566	-	Res	Sus	OK	1.76583	1.04312	2.48855	0.407422	0.154543	0.660302	-1.46653	3.94508	7.97747e-05	0.000982114	yes
TCONS_00014749	TCONS_00014749	j	XLOC_007919	AGAP004625	AGAP004625-RA	TSS7075	2R:58631174-58635480	2659	-	Res	Sus	OK	1.95181	1.13533	2.7683	0.536166	0.216634	0.855698	-1.29207	3.54906	0.00038661	0.00362867	yes
TCONS_00014763	TCONS_00014763	j	XLOC_007927	AGAP004637	AGAP004637-RA	TSS7084	2R:58762879-58799891	4956	-	Res	Sus	OK	0.447727	0.191449	0.704005	0.0576413	0	0.136145	-2.04994	2.77519	0.00551695	0.0285776	yes
TCONS_00014766	TCONS_00014766	j	XLOC_007928	AGAP013117	AGAP013117-RA	TSS7086	2R:58802037-58804478	1105	-	Res	Sus	OK	4.57208	2.51232	6.63183	28.5326	19.3135	37.7517	1.83108	-6.60565	3.95779e-11	2.78516e-09	yes
TCONS_00014771	TCONS_00014771	j	XLOC_007930	AGAP004640	AGAP004640-RB	TSS7088	2R:58817393-58839475	2741	-	Res	Sus	OK	0.444701	0.113923	0.775479	1.79287	1.02068	2.56506	1.39417	-3.24407	0.00117834	0.00887839	yes
TCONS_00014788	TCONS_00014788	j	XLOC_007943	AGAP004657	AGAP004657-RB	TSS7104	2R:59570473-59572133	1276	-	Res	Sus	OK	12.8827	8.47486	17.2905	25.7743	17.5379	34.0107	0.693493	-2.96255	0.00305098	0.0186142	yes
TCONS_00014789	TCONS_00014789	j	XLOC_007943	AGAP004657	AGAP004657-RB	TSS7104	2R:59570473-59572133	1275	-	Res	Sus	OK	10.3758	6.72314	14.0285	36.3419	24.9232	47.7606	1.25349	-5.31296	1.07861e-07	3.17065e-06	yes
TCONS_00014798	TCONS_00014798	j	XLOC_007949	AGAP004671	AGAP004671-RA	TSS7113	2R:61176223-61192892	5181	-	Res	Sus	OK	4.40084	2.93955	5.86213	1.10467	0.648142	1.56121	-1.38224	5.21461	1.84205e-07	5.07663e-06	yes
TCONS_00014808	TCONS_00014808	j	XLOC_007953	GPRMAC2	AGAP004675-RB	TSS7121	2R:61372669-61417964	2679	-	Res	Sus	OK	0.715534	0.297135	1.13393	0.0639634	0	0.163738	-2.41472	2.89906	0.00374286	0.0216132	yes
TCONS_00014810	TCONS_00014810	j	XLOC_007955	AGAP001099	AGAP001099-RA	TSS7123	2R:20159-31394	1470	-	Res	Sus	OK	3.61715	2.03254	5.20177	0	0	0	-1.79769e+308	-1.79769e+308	2.49344e-06	5.07697e-05	yes
TCONS_00014811	TCONS_00014811	j	XLOC_007955	AGAP001099	AGAP001099-RA	TSS7124	2R:20159-31394	5705	-	Res	Sus	OK	1.0566	0.619862	1.49334	0.140703	0.0256333	0.255773	-2.01616	4.40046	1.08023e-05	0.00017932	yes
TCONS_00014814	TCONS_00014814	j	XLOC_007955	AGAP001099	AGAP001099-RA	TSS7126	2R:20159-31394	951	-	Res	Sus	OK	2.49453	1.1585	3.83056	0	0	0	-1.79769e+308	-1.79769e+308	9.41451e-05	0.00112209	yes
TCONS_00014816	TCONS_00014816	j	XLOC_007956	AGAP001100	AGAP001100-RA	TSS7128	2R:36238-55039	2768	-	Res	Sus	OK	4.43782	2.84003	6.03561	2.08925	1.22984	2.94867	-0.753356	2.75621	0.00584752	0.029883	yes
TCONS_00014835	TCONS_00014835	j	XLOC_007970	AGAP001130	AGAP001130-RA	TSS7145	2R:544067-552374	7505	-	Res	Sus	OK	5.92035	4.05409	7.78661	2.22319	1.48152	2.96485	-0.979454	4.26798	1.97252e-05	0.000300529	yes
TCONS_00014876	TCONS_00014876	j	XLOC_008002	AGAP001185	AGAP001185-RA	TSS7184	2R:820754-823685	620	-	Res	Sus	OK	16.2724	10.2193	22.3254	6.58395	3.64417	9.52374	-0.904832	3.11391	0.00184628	0.012695	yes
TCONS_00014891	TCONS_00014891	j	XLOC_008011	AGAP001209	AGAP001209-RA	TSS7201	2R:1569350-1584815	4415	-	Res	Sus	OK	5.5624	3.73396	7.39083	0.869883	0.474461	1.26531	-1.85543	6.61507	3.71381e-11	2.63447e-09	yes
TCONS_00014896	TCONS_00014896	j	XLOC_008013	AGAP001215	AGAP001215-RB	TSS7203	2R:1605025-1614778	3901	-	Res	Sus	OK	1.81844	1.08504	2.55183	0.767063	0.390733	1.14339	-0.863163	2.71817	0.0065644	0.03229	yes
TCONS_00014914	TCONS_00014914	j	XLOC_008023	AGAP001235	AGAP001235-RB	TSS7221	2R:1757368-1764289	2190	-	Res	Sus	OK	2.22667	1.25268	3.20067	0.468208	0.123706	0.81271	-1.55935	3.64338	0.000269086	0.00269288	yes
TCONS_00014915	TCONS_00014915	j	XLOC_008023	AGAP001235	AGAP001235-RB	TSS7222	2R:1757368-1764289	2509	-	Res	Sus	OK	6.59339	4.35132	8.83545	2.86426	1.76546	3.96305	-0.833758	3.25281	0.00114269	0.00868394	yes
TCONS_00014919	TCONS_00014919	j	XLOC_008025	AGAP001239	AGAP001239-RA	TSS7225	2R:1839694-1887309	3531	-	Res	Sus	OK	4.08684	2.66389	5.5098	1.3625	0.780397	1.94461	-1.09845	3.9861	6.71689e-05	0.000853107	yes
TCONS_00014933	TCONS_00014933	j	XLOC_008033	AGAP001257	AGAP001257-RA	TSS7238	2R:2059456-2066200	2099	-	Res	Sus	OK	68.0209	46.8477	89.194	34.5987	23.8528	45.3447	-0.675998	3.07465	0.00210748	0.0140615	yes
TCONS_00014938	TCONS_00014938	j	XLOC_008035	AGAP001265	AGAP001265-RA	TSS7244	2R:2098830-2106258	4208	-	Res	Sus	OK	3.94105	2.59618	5.28593	0.347956	0.133845	0.562068	-2.42713	6.89888	5.24158e-12	4.47339e-10	yes
TCONS_00014941	TCONS_00014941	j	XLOC_008039	AGAP001272	AGAP001272-RB	TSS7251	2R:2147662-2175747	2830	-	Res	Sus	OK	2.2573	1.3158	3.1988	5.47647	3.59426	7.35868	0.886291	-3.27981	0.00103878	0.00803967	yes
TCONS_00014942	TCONS_00014942	j	XLOC_008039	AGAP001272	AGAP001272-RB	TSS7248	2R:2147662-2175747	4609	-	Res	Sus	OK	2.34197	1.49204	3.1919	6.14759	4.17006	8.12512	0.965068	-3.98003	6.8906e-05	0.000871907	yes
TCONS_00014950	TCONS_00014950	j	XLOC_008042	AGAP001279	AGAP001279-RA	TSS7258	2R:2208299-2279771	12254	-	Res	Sus	OK	0.190344	0.0902873	0.290401	1.41169	0.945038	1.87835	2.00371	-6.45357	1.09243e-10	7.00602e-09	yes
TCONS_00014971	TCONS_00014971	j	XLOC_008055	AGAP001304	AGAP001304-RA	TSS7270	2R:2733272-2751002	2900	-	Res	Sus	OK	1.46002	0.800377	2.11966	0.108478	0	0.244607	-2.59966	3.89824	9.68927e-05	0.00114801	yes
TCONS_00014978	TCONS_00014978	j	XLOC_008060	AGAP001315	AGAP001315-RA	TSS7281	2R:2876565-2978895	6639	-	Res	Sus	OK	0.66086	0.373694	0.948026	0	0	0	-1.79769e+308	-1.79769e+308	2.08592e-06	4.31694e-05	yes
TCONS_00014979	TCONS_00014979	j	XLOC_008060	AGAP001315	AGAP001315-RA	TSS7281	2R:2876565-2978895	6021	-	Res	Sus	OK	0.731533	0.415687	1.04738	0	0	0	-1.79769e+308	-1.79769e+308	1.80883e-06	3.82054e-05	yes
TCONS_00014991	TCONS_00014991	j	XLOC_008065	AGAP001324	AGAP001324-RA	TSS7286	2R:2998927-3003708	4534	-	Res	Sus	OK	5.25958	3.53139	6.98777	2.07596	1.32158	2.83034	-0.929626	3.79506	0.000147606	0.00163721	yes
TCONS_00015004	TCONS_00015004	j	XLOC_008073	AGAP001343	AGAP001343-RA	TSS7296	2R:3331542-3345372	2792	-	Res	Sus	OK	12.794	8.68143	16.9067	23.5593	16.2364	30.8821	0.610539	-2.73082	0.00631774	0.0314447	yes
TCONS_00015011	TCONS_00015011	j	XLOC_008077	AGAP001350	AGAP001350-RA	TSS7302	2R:3396284-3426460	3731	-	Res	Sus	OK	3.55036	2.31723	4.78348	0.646285	0.323378	0.969192	-1.70356	5.59924	2.15296e-08	7.69814e-07	yes
TCONS_00015018	TCONS_00015018	j	XLOC_008082	AGAP001358	AGAP001358-RA	TSS7310	2R:3503924-3567729	9961	-	Res	Sus	OK	4.98628	3.41681	6.55576	2.44768	1.65294	3.24243	-0.711549	3.14695	0.00164983	0.0116194	yes
TCONS_00015020	TCONS_00015020	j	XLOC_008082	AGAP001358	AGAP001358-RA	TSS7309	2R:3503924-3567729	10123	-	Res	Sus	OK	3.26504	2.2137	4.31638	0.45918	0.263138	0.655221	-1.96159	7.33641	2.1938e-13	2.38416e-11	yes
TCONS_00015043	TCONS_00015043	j	XLOC_008092	AGAP001386	AGAP001386-RA	TSS7325	2R:4103439-4112298	7954	-	Res	Sus	OK	1.72319	1.13461	2.31176	0.84283	0.525339	1.16032	-0.715165	2.81288	0.00491003	0.0264137	yes
TCONS_00015060	TCONS_00015060	j	XLOC_008102	AGAP001405	AGAP001405-RA	TSS7338	2R:4200830-4203048	1879	-	Res	Sus	OK	5.70474	3.59616	7.81332	1.47678	0.722007	2.23156	-1.35143	4.28522	1.82561e-05	0.000281157	yes
TCONS_00015070	TCONS_00015070	j	XLOC_008109	AGAP001415	AGAP001415-RA	TSS7350	2R:4565641-4585913	3642	-	Res	Sus	OK	0.855395	0.454116	1.25667	0.279395	0.0946053	0.464185	-1.11894	2.75984	0.00578294	0.0296216	yes
TCONS_00015075	TCONS_00015075	j	XLOC_008114	AGAP001417	AGAP001417-RB	TSS7355	2R:4657342-4738948	1825	-	Res	Sus	OK	51.6241	35.6254	67.6229	110.713	75.7088	145.718	0.762954	-3.44661	0.000567674	0.00491802	yes
TCONS_00015089	TCONS_00015089	j	XLOC_008123	AGAP001430	AGAP001430-RA	TSS7365	2R:4787206-4797676	5406	-	Res	Sus	OK	6.58331	4.47215	8.69447	12.7432	8.7888	16.6977	0.660463	-2.96009	0.00307549	0.0187224	yes
TCONS_00015099	TCONS_00015099	j	XLOC_008125	AGAP001435	AGAP001435-RA	TSS7372	2R:4948688-5021700	2293	-	Res	Sus	OK	0.524001	0.136072	0.911931	2.56471	1.49892	3.63049	1.5881	-3.74121	0.000183134	0.00196032	yes
TCONS_00015102	TCONS_00015102	j	XLOC_008126	AGAP001438	AGAP001438-RB	TSS7378	2R:5021903-5049054	3856	-	Res	Sus	OK	8.2232	5.57397	10.8724	2.85055	1.83409	3.86702	-1.05945	4.40916	1.03771e-05	0.000173501	yes
TCONS_00015108	TCONS_00015108	j	XLOC_008128	AGAP001446	AGAP001446-RB	TSS7380	2R:5138105-5214670	4231	-	Res	Sus	OK	3.46938	2.2862	4.65256	0	0	0	-1.79769e+308	-1.79769e+308	2.25256e-09	1.04841e-07	yes
TCONS_00015109	TCONS_00015109	j	XLOC_008128	AGAP001446	AGAP001446-RB	TSS7381	2R:5138105-5214670	5761	-	Res	Sus	OK	7.97699	5.47319	10.4808	1.3538	0.851846	1.85575	-1.77365	7.30213	2.83329e-13	3.02695e-11	yes
TCONS_00015110	TCONS_00015110	j	XLOC_008128	AGAP001446	AGAP001446-RB	TSS7382	2R:5138105-5214670	5010	-	Res	Sus	OK	7.95151	5.44116	10.4619	2.39227	1.569	3.21554	-1.20112	5.14383	2.69195e-07	7.10812e-06	yes
TCONS_00015111	TCONS_00015111	j	XLOC_008128	AGAP001446	AGAP001446-RB	TSS7383	2R:5138105-5214670	4604	-	Res	Sus	OK	1.41894	0.860963	1.97692	0	0	0	-1.79769e+308	-1.79769e+308	1.82838e-07	5.04842e-06	yes
TCONS_00015119	TCONS_00015119	j	XLOC_008131	AGAP001451	AGAP001451-RA	TSS7392	2R:5237654-5251940	4712	-	Res	Sus	OK	0.662911	0.329821	0.996	0	0	0	-1.79769e+308	-1.79769e+308	3.44033e-05	0.000484976	yes
TCONS_00015120	TCONS_00015120	j	XLOC_008131	AGAP001451	AGAP001451-RA	TSS7393	2R:5237654-5251940	4045	-	Res	Sus	OK	0.954407	0.513008	1.39581	0	0	0	-1.79769e+308	-1.79769e+308	7.6451e-06	0.000133594	yes
TCONS_00015127	TCONS_00015127	j	XLOC_008133	AGAP001455	AGAP001455-RC	TSS7401	2R:5267473-5280349	8128	-	Res	Sus	OK	3.16766	2.13191	4.20342	1.5134	0.987961	2.03884	-0.738635	3.09749	0.00195165	0.0132298	yes
TCONS_00015130	TCONS_00015130	j	XLOC_008133	AGAP001455	AGAP001455-RC	TSS7401	2R:5267473-5280349	6236	-	Res	Sus	OK	0.188606	0.0580822	0.319129	0	0	0	-1.79769e+308	-1.79769e+308	0.00192628	0.0131001	yes
TCONS_00015135	TCONS_00015135	j	XLOC_008136	AGAP001464	AGAP001464-RB	TSS7406	2R:5296805-5316269	5320	-	Res	Sus	OK	1.61257	0.998568	2.22656	0.0904611	0	0.186006	-2.88066	5.1315	2.87444e-07	7.50911e-06	yes
TCONS_00015137	TCONS_00015137	j	XLOC_008137	AGAP001467	AGAP001467-RA	TSS7407	2R:5316541-5326703	5398	-	Res	Sus	OK	2.29505	1.48574	3.10435	1.00175	0.596827	1.40668	-0.828999	3.09088	0.00199563	0.0134782	yes
TCONS_00015163	TCONS_00015163	j	XLOC_008151	GPROPDR	AGAP001498-RA	TSS7427	2R:5668261-5670871	1946	-	Res	Sus	OK	1.5572	0.773931	2.34047	0.272608	0	0.554143	-1.74261	3.03399	0.00241346	0.015596	yes
TCONS_00015179	TCONS_00015179	j	XLOC_008164	AGAP001515	AGAP001515-RB	TSS7441	2R:5745221-5759079	1824	-	Res	Sus	OK	23.2258	15.8321	30.6196	2.01324	1.05825	2.96823	-2.44552	8.56162	0	0	yes
TCONS_00015205	TCONS_00015205	j	XLOC_008181	AGAP001548	AGAP001548-RC	TSS7468	2R:6090679-6097327	1895	-	Res	Sus	OK	101.278	69.3625	133.194	54.1476	37.4122	70.883	-0.626156	2.83717	0.00455161	0.0249914	yes
TCONS_00015225	TCONS_00015225	j	XLOC_008192	AGAP001564	AGAP001564-RA	TSS7486	2R:6286885-6303274	4766	-	Res	Sus	OK	1.97544	1.23408	2.7168	0.117379	0.00138783	0.23337	-2.82314	5.34159	9.21364e-08	2.74685e-06	yes
TCONS_00015226	TCONS_00015226	j	XLOC_008192	AGAP001564	AGAP001564-RA	TSS7486	2R:6286885-6303274	3267	-	Res	Sus	OK	3.38715	2.18084	4.59346	1.38669	0.804618	1.96877	-0.893066	3.24465	0.00117594	0.00886942	yes
TCONS_00015227	TCONS_00015227	j	XLOC_008193	AGAP001566	AGAP001566-RB	TSS7490	2R:6305576-6326605	13301	-	Res	Sus	OK	4.03064	2.76881	5.29246	0.599035	0.370909	0.827161	-1.90636	7.734	1.04361e-14	1.3828e-12	yes
TCONS_00015256	TCONS_00015256	j	XLOC_008214	AGAP001608	AGAP001608-RA	TSS7517	2R:6682875-6772240	6026	-	Res	Sus	OK	1.97492	1.28529	2.66455	0.644547	0.367772	0.921321	-1.11974	4.04624	5.20469e-05	0.000690875	yes
TCONS_00015266	TCONS_00015266	j	XLOC_008218	AGAP001617	AGAP001617-RB	TSS7524	2R:6825229-6831707	3381	-	Res	Sus	OK	14.1973	9.73732	18.6572	1.18881	0.665785	1.71183	-2.4801	9.17539	0	0	yes
TCONS_00015280	TCONS_00015280	j	XLOC_008227	AGAP001632	AGAP001632-RA	TSS7534	2R:7040006-7056168	5159	-	Res	Sus	OK	1.7325	1.07563	2.38937	0.801311	0.445391	1.15723	-0.771073	2.64073	0.00827284	0.0380668	yes
TCONS_00015283	TCONS_00015283	j	XLOC_008228	AGAP001633	AGAP001633-RA	TSS7537	2R:7152552-7189157	22440	-	Res	Sus	OK	0.764283	0.506558	1.02201	0	0	0	-1.79769e+308	-1.79769e+308	1.50554e-09	7.35646e-08	yes
TCONS_00015284	TCONS_00015284	j	XLOC_008228	AGAP001633	AGAP001633-RA	TSS7538	2R:7152552-7189157	23982	-	Res	Sus	OK	3.52873	2.43369	4.62376	0.726915	0.485538	0.968293	-1.57988	6.95234	3.59268e-12	3.1328e-10	yes
TCONS_00015286	TCONS_00015286	j	XLOC_008228	AGAP001633	AGAP001633-RA	TSS7540	2R:7152552-7189157	23650	-	Res	Sus	OK	0.945528	0.634798	1.25626	0.490709	0.319809	0.66161	-0.655891	2.73947	0.00615377	0.0310063	yes
TCONS_00015292	TCONS_00015292	j	XLOC_008233	AGAP001638	AGAP001638-RB	TSS7551	2R:7234934-7246063	2760	-	Res	Sus	OK	3.83608	2.44332	5.22885	0.301222	0.0632045	0.539239	-2.54436	5.85184	4.86171e-09	2.06065e-07	yes
TCONS_00015309	TCONS_00015309	j	XLOC_008245	AGAP001662	AGAP001662-RA	TSS7569	2R:7609287-7672512	1760	-	Res	Sus	OK	3.86145	2.34818	5.37473	8.98258	5.9693	11.9959	0.844243	-3.27315	0.00106358	0.00819849	yes
TCONS_00015312	TCONS_00015312	j	XLOC_008245	AGAP001662	AGAP001662-RA	TSS7567	2R:7609287-7672512	9453	-	Res	Sus	OK	0	0	0	0.132051	0.0477102	0.216392	1.79769e+308	1.79769e+308	0.000869972	0.00697163	yes
TCONS_00015313	TCONS_00015313	j	XLOC_008245	AGAP001662	AGAP001662-RA	TSS7571	2R:7609287-7672512	10134	-	Res	Sus	OK	2.36009	1.58818	3.13201	1.13243	0.736899	1.52795	-0.734339	3.06931	0.00214551	0.0142548	yes
TCONS_00015324	TCONS_00015324	j	XLOC_008254	AGAP001674	AGAP001674-RA	TSS7579	2R:7841235-7906143	4344	-	Res	Sus	OK	1.9196	1.1986	2.6406	0	0	0	-1.79769e+308	-1.79769e+308	5.05247e-08	1.62131e-06	yes
TCONS_00015328	TCONS_00015328	j	XLOC_008256	AGAP001678	AGAP001678-RB	TSS7583	2R:8058433-8155747	3681	-	Res	Sus	OK	9.60144	6.52135	12.6815	3.387	2.20309	4.57091	-1.04197	4.39243	1.12091e-05	0.000184889	yes
TCONS_00015330	TCONS_00015330	j	XLOC_008256	AGAP001678	AGAP001678-RB	TSS7585	2R:8058433-8155747	6948	-	Res	Sus	OK	12.4305	8.57741	16.2836	4.59158	3.11989	6.06326	-0.995929	4.4672	7.92506e-06	0.000137506	yes
TCONS_00015340	TCONS_00015340	j	XLOC_008259	AGAP001683	AGAP001683-RA	TSS7593	2R:8242604-8443977	5399	-	Res	Sus	OK	10.7188	7.39366	14.0439	0.645684	0.364891	0.926477	-2.80944	10.5187	0	0	yes
TCONS_00015341	TCONS_00015341	j	XLOC_008259	AGAP001683	AGAP001683-RA	TSS7593	2R:8242604-8443977	5491	-	Res	Sus	OK	3.48909	2.33967	4.63851	7.1647	4.92517	9.40424	0.719526	-3.16883	0.00153053	0.0109647	yes
TCONS_00015342	TCONS_00015342	j	XLOC_008259	AGAP001683	AGAP001683-RA	TSS7594	2R:8242604-8443977	6061	-	Res	Sus	OK	1.28159	0.803435	1.75974	0.384499	0.197692	0.571305	-1.20392	3.93069	8.47014e-05	0.00103041	yes
TCONS_00015345	TCONS_00015345	j	XLOC_008259	AGAP001683	AGAP001683-RA	TSS7597	2R:8242604-8443977	1810	-	Res	Sus	OK	2.12662	1.14299	3.11025	0	0	0	-1.79769e+308	-1.79769e+308	7.66045e-06	0.00013365	yes
TCONS_00015354	TCONS_00015354	j	XLOC_008263	AGAP001697	AGAP001697-RB	TSS7602	2R:8779101-8780122	951	-	Res	Sus	OK	3.68851	1.93727	5.43975	0.908959	0.195496	1.62242	-1.40068	3.05376	0.0022599	0.0148251	yes
TCONS_00015374	TCONS_00015374	j	XLOC_008278	AGAP001730	AGAP001730-RA	TSS7622	2R:9035945-9067283	9810	-	Res	Sus	OK	5.96452	4.10707	7.82196	0.906055	0.580592	1.23152	-1.88448	7.9279	2.22045e-15	3.39006e-13	yes
TCONS_00015394	TCONS_00015394	j	XLOC_008289	AGAP001757	AGAP001757-RA	TSS7639	2R:9466245-9478857	6866	-	Res	Sus	OK	0.602861	0.332613	0.873109	0	0	0	-1.79769e+308	-1.79769e+308	4.06861e-06	7.76131e-05	yes
TCONS_00015396	TCONS_00015396	j	XLOC_008289	AGAP001757	AGAP001757-RA	TSS7638	2R:9466245-9478857	8076	-	Res	Sus	OK	3.33535	2.25164	4.41906	0.346824	0.178892	0.514756	-2.26351	7.76354	8.21565e-15	1.12229e-12	yes
TCONS_00015397	TCONS_00015397	j	XLOC_008289	AGAP001757	AGAP001757-RA	TSS7638	2R:9466245-9478857	8024	-	Res	Sus	OK	1.05925	0.659535	1.45897	0.199966	0.0840446	0.315888	-1.66717	4.82045	1.43235e-06	3.10868e-05	yes
TCONS_00015401	TCONS_00015401	j	XLOC_008292	AGAP001765	AGAP001765-RA	TSS7643	2R:9531152-9536643	4725	-	Res	Sus	OK	2.99796	1.95141	4.0445	1.35434	0.818058	1.89063	-0.794615	3.01059	0.00260739	0.0165605	yes
TCONS_00015412	TCONS_00015412	j	XLOC_008298	AGAP001775	AGAP001775-RA	TSS7652	2R:10155410-10167941	5015	-	Res	Sus	OK	17.9527	12.3989	23.5065	1.49268	0.924744	2.06061	-2.48717	10.144	0	0	yes
TCONS_00015417	TCONS_00015417	j	XLOC_008301	AGAP001779	AGAP001779-RC	TSS7656	2R:10180678-10210950	3258	-	Res	Sus	OK	0.424818	0.151484	0.698152	2.33386	1.46271	3.20501	1.70362	-4.58055	4.63754e-06	8.69623e-05	yes
TCONS_00015419	TCONS_00015419	j	XLOC_008301	AGAP001779	AGAP001779-RC	TSS7659	2R:10180678-10210950	3967	-	Res	Sus	OK	6.52276	4.39689	8.64863	0.622306	0.311891	0.932721	-2.34962	7.88663	3.10862e-15	4.64955e-13	yes
TCONS_00015427	TCONS_00015427	j	XLOC_008303	AGAP001782	AGAP001782-RA	TSS7663	2R:10281867-10308754	1326	-	Res	Sus	OK	13.3249	8.76593	17.8839	2.16143	1.06402	3.25883	-1.81887	5.94165	2.82169e-09	1.26913e-07	yes
TCONS_00015440	TCONS_00015440	j	XLOC_008315	GPRGPH	AGAP001807-RB	TSS7678	2R:10787887-10816046	1886	-	Res	Sus	OK	0.752086	0.225879	1.27829	0.0621388	0	0.175111	-2.49348	2.55998	0.0104679	0.0447901	yes
TCONS_00015441	TCONS_00015441	j	XLOC_008315	GPRGPH	AGAP001807-RB	TSS7679	2R:10787887-10816046	2339	-	Res	Sus	OK	0.989638	0.426691	1.55258	0.162917	0	0.364996	-1.8041	2.64414	0.00818985	0.0377953	yes
TCONS_00015458	TCONS_00015458	j	XLOC_008326	AGAP001824	AGAP001824-RA	TSS7694	2R:10910628-11079489	3450	-	Res	Sus	OK	1.01228	0.530135	1.49442	0.185777	0.015471	0.356082	-1.69541	3.28228	0.00102973	0.00800329	yes
TCONS_00015478	TCONS_00015478	j	XLOC_008342	AGAP001856	AGAP001856-RA	TSS7701	2R:11447314-11460839	3950	-	Res	Sus	OK	0.383976	0.142944	0.625009	0	0	0	-1.79769e+308	-1.79769e+308	0.00072102	0.00596878	yes
TCONS_00015480	TCONS_00015480	j	XLOC_008343	AGAP013198	AGAP013198-RA	TSS7703	2R:11470622-11496385	3772	-	Res	Sus	OK	0.888059	0.448434	1.32768	2.0987	1.29418	2.90323	0.860037	-2.74723	0.00601015	0.0304671	yes
TCONS_00015488	TCONS_00015488	j	XLOC_008350	AGAP001870	AGAP001870-RA	TSS7712	2R:11701535-11726767	4103	-	Res	Sus	OK	8.82216	6.01472	11.6296	4.47643	3.00207	5.95079	-0.67844	2.96275	0.00304904	0.018605	yes
TCONS_00015516	TCONS_00015516	j	XLOC_008361	AGAP001884	AGAP001884-RA	TSS7733	2R:11882020-11885656	1499	-	Res	Sus	OK	18.7101	12.6491	24.7712	3.44534	2.00993	4.88075	-1.69204	6.41234	1.433e-10	8.91794e-09	yes
TCONS_00015518	TCONS_00015518	j	XLOC_008362	AGAP001886	AGAP001886-RA	TSS7737	2R:11885744-11905446	3077	-	Res	Sus	OK	0.471255	0.153923	0.788587	0	0	0	-1.79769e+308	-1.79769e+308	0.00148848	0.0107279	yes
TCONS_00015524	TCONS_00015524	j	XLOC_008367	AGAP001895	AGAP001895-RA	TSS7743	2R:11928154-11945872	6967	-	Res	Sus	OK	8.39375	5.77387	11.0136	3.78993	2.56335	5.01651	-0.79514	3.53688	0.000404879	0.00376015	yes
TCONS_00015553	TCONS_00015553	j	XLOC_008395	NAA25_ANOGA	AGAP001954-RA	TSS7767	2R:12796857-12801720	3774	-	Res	Sus	OK	3.61023	2.34287	4.87759	0.327476	0.107356	0.547597	-2.40011	6.33007	2.45046e-10	1.44741e-08	yes
TCONS_00015558	TCONS_00015558	j	XLOC_008398	CRY1_ANOGA	AGAP001958-RA	TSS7770	2R:12809465-12840346	2673	-	Res	Sus	OK	1.80321	1.02519	2.58124	0.405737	0.127388	0.684087	-1.49162	3.68103	0.000232293	0.00238804	yes
TCONS_00015579	TCONS_00015579	j	XLOC_008414	AGAP001980	AGAP001980-RA	TSS7788	2R:13087478-13093968	2887	-	Res	Sus	OK	1.12859	0.555544	1.70164	0.10724	0	0.251315	-2.35366	3.27753	0.00104718	0.00809759	yes
TCONS_00015602	TCONS_00015602	j	XLOC_008430	AGAP002000	AGAP002000-RA	TSS7808	2R:13364041-13393985	2618	-	Res	Sus	OK	2.35746	1.39761	3.31732	0.22752	0.0158592	0.43918	-2.3381	4.60487	4.12731e-06	7.85293e-05	yes
TCONS_00015627	TCONS_00015627	j	XLOC_008448	AGAP002028	AGAP002028-RA	TSS7824	2R:14072672-14083763	4609	-	Res	Sus	OK	4.95734	3.3194	6.59529	0.571581	0.281935	0.861228	-2.16022	7.14184	9.20819e-13	9.02873e-11	yes
TCONS_00015641	TCONS_00015641	j	XLOC_008455	AGAP002041	AGAP002041-RB	TSS7835	2R:14311095-14358265	5512	-	Res	Sus	OK	0.165383	0.0229472	0.307819	0.630424	0.327942	0.932905	1.33813	-2.71458	0.00663599	0.0325152	yes
TCONS_00015642	TCONS_00015642	j	XLOC_008455	AGAP002041	AGAP002041-RB	TSS7835	2R:14311095-14358265	5733	-	Res	Sus	OK	0.575221	0.285078	0.865364	0.0328871	0	0.0851135	-2.86168	3.4349	0.000592772	0.00509147	yes
TCONS_00015644	TCONS_00015644	j	XLOC_008455	AGAP002041	AGAP002041-RB	TSS7835	2R:14311095-14358265	5699	-	Res	Sus	OK	0.39892	0.170854	0.626987	0.0144049	0	0.0430029	-3.32119	3.21514	0.00130382	0.00966051	yes
TCONS_00015646	TCONS_00015646	j	XLOC_008458	AGAP002048	AGAP002048-RA	TSS7838	2R:14532655-14541794	4670	-	Res	Sus	OK	1.72575	1.07709	2.37441	0.0565517	0	0.128876	-3.41826	5.1287	2.91742e-07	7.6034e-06	yes
TCONS_00015654	TCONS_00015654	j	XLOC_008463	AGAP002050	AGAP002050-RA	TSS7846	2R:14554837-14586948	3561	-	Res	Sus	OK	2.91687	1.83013	4.00361	0.353037	0.110399	0.595675	-2.11169	5.4023	6.57909e-08	2.04285e-06	yes
TCONS_00015655	TCONS_00015655	j	XLOC_008464	AGAP002054	AGAP002054-RA	TSS7849	2R:14658775-14682357	4486	-	Res	Sus	OK	3.8193	2.52598	5.11262	0.456094	0.211302	0.700885	-2.12512	6.69743	2.12121e-11	1.59445e-09	yes
TCONS_00015677	TCONS_00015677	j	XLOC_008479	AGAP002086	AGAP002086-RA	TSS7874	2R:15147819-15154042	3782	-	Res	Sus	OK	2.10294	1.28585	2.92002	0.223851	0.0449598	0.402743	-2.24011	5.04188	4.6099e-07	1.14271e-05	yes
TCONS_00015686	TCONS_00015686	j	XLOC_008484	AGAP002094	AGAP002094-RA	TSS7882	2R:15256255-15269590	2921	-	Res	Sus	OK	2.61005	1.59213	3.62797	1.04645	0.545127	1.54777	-0.913971	2.95906	0.00308575	0.0187641	yes
TCONS_00015688	TCONS_00015688	j	XLOC_008485	AGAP013535	AGAP013535-RA	TSS7884	2R:15270419-15292175	1449	-	Res	Sus	OK	4.92786	2.8527	7.00301	1.38338	0.541074	2.22569	-1.27037	3.43199	0.000599159	0.00513633	yes
TCONS_00015690	TCONS_00015690	j	XLOC_008486	AGAP002095	AGAP002095-RB	TSS7885	2R:15294176-15326760	4723	-	Res	Sus	OK	6.40252	4.35149	8.45355	2.00093	1.28657	2.71529	-1.16308	4.84951	1.23765e-06	2.72771e-05	yes
TCONS_00015692	TCONS_00015692	j	XLOC_008486	AGAP002095	AGAP002095-RB	TSS7887	2R:15294176-15326760	2614	-	Res	Sus	OK	0.591666	0.223434	0.959899	0.0446142	0	0.121958	-2.58489	2.80671	0.00500509	0.0267846	yes
TCONS_00015704	TCONS_00015704	j	XLOC_008493	AGAP002109	AGAP002109-RA	TSS7893	2R:15708661-15737227	3631	-	Res	Sus	OK	1.55785	0.906303	2.20939	4.09016	2.70478	5.47554	0.96528	-3.58716	0.000334296	0.00321424	yes
TCONS_00015710	TCONS_00015710	j	XLOC_008496	AGAP002114	AGAP002114-RA	TSS7899	2R:15755286-15781688	4729	-	Res	Sus	OK	1.51488	0.911975	2.11778	0.182969	0.0377966	0.328142	-2.11377	4.76263	1.91083e-06	4.01102e-05	yes
TCONS_00015712	TCONS_00015712	j	XLOC_008497	AGAP002115	AGAP002115-RA	TSS7904	2R:15781998-15913118	2568	-	Res	Sus	OK	1.27915	0.644644	1.91366	0.236991	0.00644496	0.467537	-1.68593	3.08786	0.00201601	0.0135826	yes
TCONS_00015713	TCONS_00015713	j	XLOC_008497	AGAP002115	AGAP002115-RA	TSS7905	2R:15781998-15913118	3034	-	Res	Sus	OK	0.886287	0.419643	1.35293	0	0	0	-1.79769e+308	-1.79769e+308	7.27701e-05	0.000911133	yes
TCONS_00015715	TCONS_00015715	j	XLOC_008497	AGAP002115	AGAP002115-RA	TSS7902	2R:15781998-15913118	3341	-	Res	Sus	OK	0	0	0	0.433326	0.158369	0.708282	1.79769e+308	1.79769e+308	0.000810909	0.00658321	yes
TCONS_00015724	TCONS_00015724	j	XLOC_008500	AGAP002123	AGAP002123-RA	TSS7915	2R:16049125-16074619	5402	-	Res	Sus	OK	5.9279	4.01897	7.83682	0.924867	0.539009	1.31072	-1.85777	7.05001	1.78901e-12	1.66182e-10	yes
TCONS_00015754	TCONS_00015754	j	XLOC_008519	AGAP002165	AGAP002165-RA	TSS7949	2R:16668901-16682680	2500	-	Res	Sus	OK	0.926276	0.430511	1.42204	0	0	0	-1.79769e+308	-1.79769e+308	9.3205e-05	0.00111389	yes
TCONS_00015757	TCONS_00015757	j	XLOC_008520	AGAP002166	AGAP002166-RA	TSS7950	2R:16812392-16816183	2632	-	Res	Sus	OK	5.3116	3.46792	7.15528	1.20731	0.638124	1.7765	-1.4815	5.06108	4.16893e-07	1.04515e-05	yes
TCONS_00015765	TCONS_00015765	j	XLOC_008525	AGAP002178	AGAP002178-RA	TSS7958	2R:16920241-17198201	3116	-	Res	Sus	OK	4.12617	2.67329	5.57905	0.973125	0.50918	1.43707	-1.44459	4.87469	1.08979e-06	2.43344e-05	yes
TCONS_00015773	TCONS_00015773	j	XLOC_008529	AGAP002186	AGAP002186-RA	TSS7963	2R:17216189-17379169	2898	-	Res	Sus	OK	4.59786	2.98595	6.20977	2.20993	1.33843	3.08143	-0.732631	2.77692	0.00548773	0.0285033	yes
TCONS_00015794	TCONS_00015794	j	XLOC_008542	AGAP002219	AGAP002219-RA	TSS7983	2R:17694405-17702648	5542	-	Res	Sus	OK	2.7587	1.82461	3.69278	1.15567	0.713534	1.5978	-0.870081	3.40611	0.000658959	0.00554448	yes
TCONS_00015804	TCONS_00015804	j	XLOC_008549	AGAP002236	AGAP002236-RA	TSS7991	2R:18013545-18025126	2491	-	Res	Sus	OK	3.14876	1.93049	4.36704	0.50867	0.175374	0.841966	-1.82297	4.79138	1.65642e-06	3.53756e-05	yes
TCONS_00015805	TCONS_00015805	j	XLOC_008549	AGAP002236	AGAP002236-RA	TSS7991	2R:18013545-18025126	2508	-	Res	Sus	OK	3.28229	2.02492	4.53966	1.41806	0.765968	2.07016	-0.83925	2.80449	0.00503969	0.0269339	yes
TCONS_00015817	TCONS_00015817	j	XLOC_008556	AGAP002250	AGAP002250-RA	TSS8006	2R:18098720-18192489	6409	-	Res	Sus	OK	2.85813	1.90155	3.81471	0.0948675	0.00905033	0.180685	-3.40544	7.06136	1.6489e-12	1.54141e-10	yes
TCONS_00015821	TCONS_00015821	j	XLOC_008558	AGAP002253	AGAP002253-RB	TSS8009	2R:18208824-18223569	2910	-	Res	Sus	OK	6.26564	4.1742	8.35707	2.38357	1.47984	3.2873	-0.966482	3.82654	0.000129959	0.00147106	yes
TCONS_00015822	TCONS_00015822	j	XLOC_008558	AGAP002253	AGAP002253-RB	TSS8009	2R:18208824-18223569	2987	-	Res	Sus	OK	5.57653	3.69743	7.45562	0.874717	0.447786	1.30165	-1.85242	6.24658	4.19535e-10	2.36716e-08	yes
TCONS_00015829	TCONS_00015829	j	XLOC_008562	AGAP002261	AGAP002261-RA	TSS8014	2R:18261368-18272647	2994	-	Res	Sus	OK	2.06627	1.20018	2.93236	0.414171	0.128124	0.700218	-1.60722	3.9788	6.92646e-05	0.00087519	yes
TCONS_00015832	TCONS_00015832	j	XLOC_008563	AGAP002262	AGAP002262-RA	TSS8018	2R:18298195-18335351	4649	-	Res	Sus	OK	1.39529	0.831544	1.95903	0.56839	0.284573	0.852206	-0.898048	2.79625	0.00516988	0.0274337	yes
TCONS_00015856	TCONS_00015856	j	XLOC_008573	AGAP002282	AGAP002282-RA	TSS8037	2R:18547377-18568155	2651	-	Res	Sus	OK	2.31113	1.36505	3.2572	0.307231	0.0607932	0.553669	-2.01789	4.48149	7.4124e-06	0.000130043	yes
TCONS_00015861	TCONS_00015861	j	XLOC_008576	AGAP002288	AGAP002288-RA	TSS8041	2R:18590950-18629465	7686	-	Res	Sus	OK	2.20902	1.45919	2.95886	0.615222	0.355077	0.875367	-1.27832	4.71499	2.4172e-06	4.93997e-05	yes
TCONS_00015885	TCONS_00015885	j	XLOC_008596	AGAP002327	AGAP002327-RA	TSS8066	2R:19895008-19899622	2400	-	Res	Sus	OK	1.43557	0.738681	2.13247	0	0	0	-1.79769e+308	-1.79769e+308	1.89498e-05	0.000290319	yes
TCONS_00015899	TCONS_00015899	j	XLOC_008606	AGAP002342	AGAP002342-RA	TSS8079	2R:20376221-20408375	2674	-	Res	Sus	OK	3.96904	2.5059	5.43217	1.82043	1.04274	2.59812	-0.779451	2.76272	0.00573222	0.0294404	yes
TCONS_00015900	TCONS_00015900	j	XLOC_008607	AGAP002344	AGAP002344-RA	TSS8082	2R:20485460-20499440	2365	-	Res	Sus	OK	1.17464	0.569794	1.77948	0.138692	0	0.311747	-2.13646	3.16551	0.00154811	0.0110763	yes
TCONS_00015963	TCONS_00015963	j	XLOC_008658	AGAP002438	AGAP002438-RB	TSS8136	2R:21385433-21421240	5022	-	Res	Sus	OK	0.617311	0.314951	0.919672	0.137876	0.0179535	0.257799	-1.49902	3.0034	0.00266982	0.0168262	yes
TCONS_00015964	TCONS_00015964	j	XLOC_008658	AGAP002438	AGAP002438-RB	TSS8134	2R:21385433-21421240	5828	-	Res	Sus	OK	10.9382	7.53139	14.345	4.5083	3.05194	5.96465	-0.886341	3.95042	7.80135e-05	0.000965551	yes
TCONS_00015982	TCONS_00015982	j	XLOC_008669	AGAP002454	AGAP002454-RA	TSS8154	2R:21561255-21562598	992	-	Res	Sus	OK	3.83386	2.06573	5.60199	0.951243	0.242982	1.65951	-1.39386	3.18296	0.00145777	0.0105479	yes
TCONS_00015984	TCONS_00015984	j	XLOC_008670	AGAP002456	AGAP002456-RA	TSS8159	2R:21564199-21572471	3279	-	Res	Sus	OK	1.25874	0.696168	1.82131	0	0	0	-1.79769e+308	-1.79769e+308	3.82152e-06	7.34395e-05	yes
TCONS_00015986	TCONS_00015986	j	XLOC_008670	AGAP002456	AGAP002456-RA	TSS8158	2R:21564199-21572471	3957	-	Res	Sus	OK	8.82738	6.01795	11.6368	0.990974	0.562062	1.41989	-2.18693	8.14138	4.44089e-16	7.74488e-14	yes
TCONS_00016001	TCONS_00016001	j	XLOC_008678	AGAP002461	AGAP002461-RA	TSS8171	2R:21724561-21791536	3889	-	Res	Sus	OK	12.5763	8.63001	16.5226	6.7138	4.55167	8.87592	-0.627651	2.79181	0.00524145	0.0275615	yes
TCONS_00016016	TCONS_00016016	j	XLOC_008690	AGAP002488	AGAP002488-RA	TSS8188	2R:21958775-21966195	4608	-	Res	Sus	OK	6.92686	4.7021	9.15161	2.77619	1.82324	3.72914	-0.914326	3.89003	0.00010023	0.00118216	yes
TCONS_00016020	TCONS_00016020	j	XLOC_008692	AGAP002492	AGAP002492-RA	TSS8194	2R:21974888-21984645	4678	-	Res	Sus	OK	1.05713	0.611604	1.50266	0.225693	0.0737419	0.377645	-1.54414	3.88807	0.000101046	0.00119051	yes
TCONS_00016022	TCONS_00016022	j	XLOC_008692	AGAP002492	AGAP002492-RA	TSS8194	2R:21974888-21984645	1989	-	Res	Sus	OK	1.13031	0.518549	1.74207	0	0	0	-1.79769e+308	-1.79769e+308	0.000109828	0.00127592	yes
TCONS_00016025	TCONS_00016025	j	XLOC_008695	AGAP002497	AGAP002497-RA	TSS8202	2R:22013956-22030107	2878	-	Res	Sus	OK	0.348906	0.0906864	0.607127	2.09309	1.27793	2.90826	1.79159	-4.28457	1.83094e-05	0.000281683	yes
TCONS_00016027	TCONS_00016027	j	XLOC_008695	AGAP002497	AGAP002497-RA	TSS8203	2R:22013956-22030107	2947	-	Res	Sus	OK	4.81271	3.16113	6.46428	0.224702	0.0345608	0.414843	-3.06424	6.7115	1.9263e-11	1.46542e-09	yes
TCONS_00016035	TCONS_00016035	j	XLOC_008699	AGAP002502	AGAP002502-RA	TSS8208	2R:22050322-22066257	8639	-	Res	Sus	OK	12.3164	8.50154	16.1312	2.30412	1.54679	3.06145	-1.67623	7.42299	1.14575e-13	1.30294e-11	yes
TCONS_00016037	TCONS_00016037	j	XLOC_008701	AGAP002505	AGAP002505-RA	TSS8212	2R:22069368-22091602	5803	-	Res	Sus	OK	6.21513	4.23186	8.19839	0.661696	0.364919	0.958474	-2.23993	8.13866	4.44089e-16	7.77561e-14	yes
TCONS_00016038	TCONS_00016038	j	XLOC_008701	AGAP002505	AGAP002505-RA	TSS8213	2R:22069368-22091602	5790	-	Res	Sus	OK	2.63264	1.72666	3.53862	0.420479	0.205529	0.63543	-1.83435	5.9533	2.62785e-09	1.19906e-07	yes
TCONS_00016039	TCONS_00016039	j	XLOC_008701	AGAP002505	AGAP002505-RA	TSS8214	2R:22069368-22091602	9485	-	Res	Sus	OK	1.076	0.67867	1.47334	2.13604	1.43031	2.84177	0.685699	-2.76772	0.00564499	0.0291042	yes
TCONS_00016042	TCONS_00016042	j	XLOC_008701	AGAP002505	AGAP002505-RA	TSS8214	2R:22069368-22091602	3948	-	Res	Sus	OK	3.19867	2.05152	4.34582	0.241307	0.0518295	0.430785	-2.58442	5.98774	2.12775e-09	9.95574e-08	yes
TCONS_00016045	TCONS_00016045	j	XLOC_008703	AGAP002511	AGAP002511-RA	TSS8219	2R:22133492-22143666	4171	-	Res	Sus	OK	1.54246	0.927914	2.15701	0.142619	0.0125152	0.272723	-2.38096	4.78365	1.72142e-06	3.65516e-05	yes
TCONS_00016051	TCONS_00016051	j	XLOC_008707	AGAP002518	AGAP002518-RA	TSS8225	2R:22184935-22193860	2761	-	Res	Sus	OK	2.03912	1.18718	2.89105	0.839366	0.406425	1.27231	-0.887624	2.67447	0.00748478	0.0352945	yes
TCONS_00016060	TCONS_00016060	j	XLOC_008713	AGAP002523	AGAP002523-RA	TSS8232	2R:22341956-22352968	8809	-	Res	Sus	OK	1.79634	1.18545	2.40723	0.097966	0.0225359	0.173396	-2.90889	6.91177	4.78639e-12	4.10876e-10	yes
TCONS_00016064	TCONS_00016064	j	XLOC_008716	AGAP002530	AGAP002530-RA	TSS8235	2R:22417883-22443284	5494	-	Res	Sus	OK	5.44464	3.65218	7.23709	2.61038	1.68614	3.53462	-0.735134	3.04107	0.00235737	0.0153165	yes
TCONS_00016068	TCONS_00016068	j	XLOC_008718	AGAP002534	AGAP002534-RB	TSS8237	2R:22450264-22451627	918	-	Res	Sus	OK	2.53335	1.20449	3.8622	0.280147	0	0.650917	-2.20198	3.09346	0.00197839	0.0133781	yes
[truncated: 6,114 more rows]
